# Supplementary material for: Modular synthesis of bicyclic twisted amides and anilines
Source: Royal Society of Chemistry journal article supplement (doi:10.1039/d3cc01470c), 2023-01-01

## Modular Synthesis of Bicyclic Twisted Amides and Anilines

### Supporting Information

Alexandra Hindle, Krzysztof Baj, Jonathan A. Iggo, Daniel J. Cox, Christopher M. Pask,  
Adam Nelson\* and Stephen P. Marsden\*

#### Contents

|                                                                        |    |
|------------------------------------------------------------------------|----|
| 1. General Experimental.....                                           | 2  |
| 2. General Methods.....                                                | 4  |
| 3. Synthesis of Enecarbamates.....                                     | 7  |
| 4. Synthesis of Bicyclic Lactams.....                                  | 13 |
| 5. Synthesis of Bicyclic Anilines .....                                | 43 |
| 6. NMR, IR, Distortion Parameters and X-ray data <sup>6,17</sup> ..... | 57 |
| 7. pK <sub>a</sub> Determinations of Bicyclic Anilines .....           | 62 |
| 8. Antimicrobial Assays of Twisted Lactams.....                        | 86 |
| 9. References.....                                                     | 90 |
| 10. Spectra .....                                                      | 92 |

## 1. General Experimental

Commercially available starting materials were obtained from Sigma–Aldrich, Fluorochem, Alfa Aesar and Acros. All non-aqueous reactions were performed under a nitrogen atmosphere unless otherwise stated. Water-sensitive reactions were performed in anhydrous solvents in oven-dried glassware cooled under nitrogen before use. Anhydrous dichloromethane (DCM), anhydrous tetrahydrofuran (THF), anhydrous toluene, anhydrous diethyl ether, anhydrous ethanol, anhydrous methanol and anhydrous acetonitrile were obtained from a PureSolv MD5 Purification System. Anhydrous dimethyl sulfoxide (DMSO) was obtained from SureSeal bottles from Sigma–Aldrich. All other solvents used were of chromatography or analytical grade. An IKA RV 10 rotary evaporator was used to remove the solvents under reduced pressure.

Thin layer chromatography (TLC) was performed using aluminium backed silica (Merck silica gel 60 F254) plates obtained from Merck. Ultraviolet lamp ( $\lambda_{\text{max}} = 254$  nm) and  $\text{KMnO}_4$  were used for visualization. Flash column chromatography was performed using silica gel 60 (35–70  $\mu\text{m}$  particles) supplied by Merck. A Bruker Daltonics micrOTOF spectrometer with electrospray (ES) ionisation source was used for high-resolution mass spectrometry (HRMS). Perkin-Elmer One FT-IR spectrometer was used to analyse the infrared spectra. Melting points (m.p.) were determined using Stuart melting point apparatus SMP3. Mass directed auto-purification (MDAP) was performed using an Agilent 1290 Infinity II Preparative HPLC system with mass spectrometer (LC/MSD XT) and fraction collector. The system ran in positive mode with an Agilent Technologies PLRP-S, 300Å, 8  $\mu\text{m}$  particle size, 150x25 mm column at ambient temperature with a binary solvent system: MeCN and  $\text{H}_2\text{O}$  with 0.1% formic acid.

Proton ( $^1\text{H}$ ), carbon ( $^{13}\text{C}$ ) and fluorine ( $^{19}\text{F}$ ) NMR data was collected on a Bruker 300, 400 or 500 MHz spectrometer. Data was collected at 300 K unless otherwise stated. Chemical shifts ( $\delta$ ) are given in parts per million (ppm) and they are referenced to the residual solvent peak. Coupling constants ( $J$ ) are reported in Hertz (Hz) and splitting patterns are reported in an abbreviated manner: app. (apparent), s (singlet), d (doublet), t (triplet), q (quartet), p (pentet), m (multiplet), br. (broad). Assignments were made using COSY, DEPT, HMQC, HMBC and NOESY experiments.

X-ray measurements were carried out at 120 K on an Agilent SuperNova diffractometer equipped with an Atlas CCD detector and connected to an Oxford Cryostream low temperature device using mirror monochromated Cu  $K_\alpha$  radiation ( $\lambda = 1.54184 \text{ \AA}$ ) from a Microfocus X-ray source. The structure was solved by intrinsic phasing using SHELXT<sup>1</sup> and refined by a full matrix least squares technique based on  $F^2$  using SHELXL2014.<sup>2</sup>

## 2. General Methods

**General method A:** Synthesis of enecarbamates *via* Shono oxidation and Brønsted acid-mediated elimination:<sup>3,4</sup>

An Electrasyn vial (10 or 20 mL) fitted with a stir bar was charged with the Boc-protected amine in anhydrous methanol (10 or 20 mL) containing tetraethylammonium tosylate and was electrolysed with graphite electrodes at a constant current of 65 mA at 25 °C. After the passage of 2.5 Fmol<sup>-1</sup> of electricity, the mixture was concentrated *in vacuo*. The residue was taken up in toluene, NH<sub>4</sub>Cl (20 mol%) was added and the mixture stirred at reflux for 1-4 h. Then, the mixture was allowed to cool to rt and the solvent evaporated under reduced pressure to give a crude product. The crude product was purified by flash column chromatography to yield the corresponding enecarbamate as a mixture of rotamers.

**General method B:** Hydroamination of enecarbamates with amino esters:<sup>5</sup>

To a 7 mL vial were added [Ir(dF(Me)ppy)<sub>2</sub>(dtbbpy)PF<sub>6</sub>] (5.1 mg, 2 mol%), TRIP thiol (27 mg, 50 mol%), amino ester hydrochloride (0.50 mmol), enecarbamate (0.25 mmol) and lithium hydroxide monohydrate (21.0 mg, 0.50 mmol). The vial was flushed with N<sub>2</sub> and toluene (5 mL) was then added and the resultant mixture was stirred for 16 h under irradiation with a blue LED and fan cooling. The reaction was scaled out by repetition in additional vials as specified. The solvent was evaporated under reduced pressure to give a crude product. The crude product was purified by flash column chromatography to yield the resulting amine as a mixture of rotamers.



**General method C:** Cbz/POC protection of amino esters and benzylamines:<sup>6</sup>

Benzyl or propargyl chloroformate (1.1 eq.) was slowly added to a mixture of amine (1.0 eq.) and NaHCO<sub>3</sub> (6.0 eq.) in DCM. The mixture was stirred for 16-96 h at room temperature, and then water was added (10 mL). The two layers were separated, and the organic layer was dried (MgSO<sub>4</sub>) and the solvent evaporated under reduced pressure to give a crude product. The crude product was purified by flash column chromatography to yield the resulting carbamate as a mixture of rotamers.

**General method D:** Tin-mediated cyclisation of protected amino esters:<sup>6</sup>

NaOH (1.1 eq.) was added to a solution of amino ester (1.0 eq.) in 1:1 MeOH:water (0.059 M) and stirred at 70 °C for 2 h or until complete by TLC and the solvent then evaporated under reduced pressure. To the resultant residue was added HCl (6 N) (0.089 M) and EtOAc (0.071 M) and the mixture stirred for 3 h or until complete by TLC and the solvent then evaporated under reduced pressure. To a suspension of the crude amino acid in toluene (0.075 M) was added *n*-Bu<sub>2</sub>SnO (1.01 eq.) and the mixture refluxed under Dean-Stark for 16 h. The solvent was then evaporated under reduced pressure and the residue partitioned between DCM (10 mL) and water (10 mL). The organic layer was then washed with water (3 × 10 mL) and dried (MgSO<sub>4</sub>) and the solvent then evaporated under reduced pressure to give the crude product. The crude product was purified by flash column chromatography to yield the resulting bicyclic lactam as a mixture of rotamers.

**General method E:** Hydroamination of enecarbamates with benzylamines:<sup>5</sup>

To a 7 mL vial were added [Ir(dF(Me)ppy)<sub>2</sub>(dtbbpy)PF<sub>6</sub>] (5.1 mg, 2 mol%), TRIP thiol (27 mg, 50 mol%), 2-bromobenzylamine (186 mg, 1.00 mmol) and enecarbamate (0.25 mmol). Toluene (5 mL) was then added under N<sub>2</sub> and the resultant mixture was stirred for 16 h under irradiation with a blue LED and fan cooling. The reaction

was scaled out by repetition in additional vials as specified. Then, the solvent was evaporated under reduced pressure to give a crude product. The crude product was purified by flash column chromatography to yield the resulting amine as a mixture of rotamers.

**General method F:** Buchwald-Hartwig cyclisations of protected benzylamines:<sup>7</sup>

HCl (6 N) (0.089 M) was added to a solution of protected amine (1 eq.) in EtOAc (0.071 M) and stirred for 3 h or until complete by TLC. The solvent was then removed under reduced pressure to give the corresponding NH amine. Pd<sub>2</sub>(dba)<sub>3</sub> (4 mol%) and BINAP (8 mol%) were dissolved in toluene and stirred at 110 °C for 30 min and then cooled to rt. This solution was then added to NaOtBu (1.9 eq.) and the NH amine and the resulting mixture stirred at reflux for 16-96 h. The mixture was then allowed to cool to rt, filtered through celite, and washed with DCM (20 mL). The solvent was then removed under reduced pressure to give a crude product. The crude product was purified by flash column chromatography to yield the corresponding bicyclic aniline as a mixture of rotamers.

### 3. Synthesis of Enecarbamates

#### *cis-tert*-Butyl octahydro-2*H*-isoindole-2-carboxylate **S1**

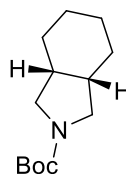

**S1**

Boc<sub>2</sub>O (2.7 mL, 11.8 mmol) was added to a solution of *cis*-octahydro-1*H*-isoindole hydrochloride (1.59 g, 9.84 mmol) and Et<sub>3</sub>N (2.7 mL, 19.7 mmol) in DCM (30 mL) and stirred at rt for 72 h. The solvent was then evaporated under reduced pressure to give a crude product. The crude product was purified by flash column chromatography eluting with 90:10 hexane–EtOAc to yield slightly impure *carbamate S1* as a 1:1 mixture of rotamers (2.17 g, 97%) as a colourless oil, *R*<sub>f</sub> 0.31 (80:20 hexane–EtOAc);  $\nu_{\max}/\text{cm}^{-1}$  2975, 2926, 2856, 1693 (C=O), 1392, 1304, 1136, 1092, 875 and 771;  $\delta_{\text{H}}$  (400 MHz, CDCl<sub>3</sub>) 3.36–3.25 (2H, m, 2-H, 9-H), 3.22 (1H, dd, *J* 10.6, 5.4, m, 2-H, 9-H), 3.14 (1H, dd, *J* 10.5, 5.7, m, 2-H, 9-H), 2.21–2.09 (2H, m, 3-H, 8-H), 1.59–1.42 (15H, m, Boc CMe<sub>3</sub>, 4-H<sub>2</sub>, 5-H<sub>A</sub>, 6-H<sub>A</sub>, 7-H<sub>2</sub>), 1.38–1.39 (2H, m, 5-H<sub>B</sub>, 6-H<sub>B</sub>);  $\delta_{\text{C}}$  (100 MHz, CDCl<sub>3</sub>) 155.4 (Boc C=O), 80.0 (Boc CMe<sub>3</sub>), 50.1 (C-2, C-9), 49.7 (C-2, C-9), 37.5 (C-3, C-8), 36.8 (C-3, C-8), 28.7 (Boc CMe<sub>3</sub>), 26.0 (C-4, C-7), 23.02 (C-5, C-6), 22.96 (C-5, C-6) (10 out of 14 signals present); HRMS found MNa<sup>+</sup>, 248.1618. C<sub>13</sub>H<sub>23</sub>NO<sub>2</sub>Na requires 248.1621.

**tert-Butyl 1,4,5,6,7,7a-hexahydro-2H-isoindole-2-carboxylate 5b**

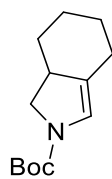

**5b**

Compound **5b** was synthesised using general method A using Boc protected amine **S1** (2.00 g, 8.88 mmol), anhydrous methanol (20 mL), tetraethylammonium tosylate (166 mg, 0.56 mmol), toluene (20 mL) and NH<sub>4</sub>Cl (95.0 mg, 20 mol%). Reflux was carried out for 1 h. The crude product was purified by flash column chromatography eluting with 95:5 hexane–EtOAc to yield the *enecarbamate* **5b** as a 60:40 mixture of rotamers (1.45 g, 70%) as a pale yellow oil, *R*<sub>f</sub> 0.68 (80:20 hexane–EtOAc);  $\nu_{\max}/\text{cm}^{-1}$  2976, 2931, 2858, 1687 (C=O), 1385, 1365, 1164, 1109, 892 and 773;  $\delta_{\text{H}}$  (500 MHz, CDCl<sub>3</sub>) 6.24 (0.4H, br s, 2-H), 6.12 (0.6H, br s, 2-H), 3.90 (0.6H, app. t, *J* 10.9, 9-H<sub>A</sub>), 3.84 (0.4H, app. t, *J* 11.3, 9-H<sub>A</sub>), 3.24 (0.6H, dd, *J* 11.4, 7.1, m, 9-H<sub>B</sub>), 3.19 (0.4H, dd, *J* 11.3, 7.2, m, 9-H<sub>B</sub>), 2.79–2.66 (1H, 8-H), 2.38 (1H, app. t, *J* 15.3, 4-H<sub>A</sub>), 2.00–1.87 (2H, m, 4-H<sub>B</sub>, 7-H<sub>A</sub>), 1.84–1.72 (2H, m, 5-H<sub>A</sub>, 6-H<sub>A</sub>), 1.46 (9H, s, Boc CMe<sub>3</sub>), 1.31 (1H, app. qt, *J* 13.1, 3.0, 6-H<sub>B</sub>), 1.22 (1H, app. qt, *J* 12.8, 3.2, 5-H<sub>B</sub>), 1.16 (1H, app. dq, *J* 12.5, 3.1, 7-H<sub>B</sub>);  $\delta_{\text{C}}$  (125 MHz, CDCl<sub>3</sub>) 152.3 (Boc C=O), 151.7 (Boc C=O), 125.5 (C-3), 125.4 (C-3), 120.5 (C-2), 120.4 (C-2), 79.8 (Boc CMe<sub>3</sub>), 79.6 (Boc CMe<sub>3</sub>), 52.2 (C-9), 51.7 (C-9), 43.3 (C-8), 42.2 (C-8), 34.6 (C-7), 28.6 (Boc CMe<sub>3</sub>), 27.6 (C-5), 25.8 (C-4), 25.5 (C-6) (17 out of 22 signals present); HRMS found MNa<sup>+</sup>, 246.1464. C<sub>13</sub>H<sub>21</sub>NO<sub>2</sub>Na requires 246.1465.

### **tert-Butyl piperidine-1-carboxylate **S2****

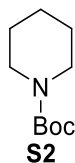

Boc<sub>2</sub>O (14 mL, 60 mmol) was added to piperidine (6.5 mL, 66 mmol) in DCM (210 mL) and stirred at rt for 72 h. The solvent was then evaporated under reduced pressure to yield carbamate **S2** as a mixture of rotamers (11.0 g, 99%) as a colourless oil,  $\nu_{\max}/\text{cm}^{-1}$  2976, 2934, 2855, 1687 (C=O), 1446, 1416, 1257, 1237, 1175, 1083 and 868;  $\delta_{\text{H}}$  (400 MHz, CDCl<sub>3</sub>) 3.38–3.31 (4H, m, 2-H<sub>2</sub>, 6-H<sub>2</sub>), 1.59–1.53 (2H, m, 4-H<sub>2</sub>), 1.53–1.47 (4H, m, 3-H<sub>2</sub>, 5-H<sub>2</sub>), 1.45 (9H, s, Boc CMe<sub>3</sub>);  $\delta_{\text{C}}$  (100 MHz, CDCl<sub>3</sub>) 155.1 (Boc C=O), 79.2 (Boc CMe<sub>3</sub>), 44.8 (C-2, C-6), 28.6 (Boc CMe<sub>3</sub>), 25.9 (C-4), 24.7 (C-3, C-5); HRMS found MNa<sup>+</sup>, 208.1308. C<sub>10</sub>H<sub>19</sub>NO<sub>2</sub>Na requires 208.1308. Spectroscopic data are consistent with those reported in the literature.<sup>8</sup>

### **tert-Butyl 3,4-dihydropyridine-1(2H)-carboxylate **5c****

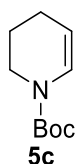

Compound **5c** was synthesised using general method A using Boc protected amine **S1** (1.02 g, 4.56 mmol), anhydrous methanol (10 mL), tetraethylammonium tosylate (83 mg, 0.28 mmol), toluene (10 mL) and NH<sub>4</sub>Cl (57.8 mg, 20 mol%). Reflux was carried out for 4 h. The crude product was purified by flash column chromatography eluting with 95:5 hexane–Et<sub>2</sub>O to yield the enecarbamate **5c** as a 60:40 mixture of rotamers (464 mg, 47%) as a colourless oil,  $R_{\text{f}}$  0.44 (80:20 hexane–Et<sub>2</sub>O);  $\nu_{\max}/\text{cm}^{-1}$  2976, 2934, 1688 (C=O), 1365, 1253, 1150, 990, 918, 876

and 729;  $\delta_{\text{H}}$  (500 MHz,  $\text{CDCl}_3$ ) 6.85 (0.4H, d,  $J$  8.5, 2-H), 6.71 (0.6H, d,  $J$  8.4, 2-H), 4.90 (0.4H, m, 3-H), 4.79 (0.6H, dt,  $J$  8.1 and 3.8, 3-H), 3.63–3.43 (2H, m, 6-H<sub>2</sub>), 2.09–1.95 (2H, m, 4-H<sub>2</sub>), 1.86–1.72 (2H, m, 5-H<sub>2</sub>), 1.48 (9H, s, Boc CMe<sub>3</sub>);  $\delta_{\text{C}}$  (125 MHz,  $\text{CDCl}_3$ ) 152.9 (Boc C=O), 152.5 (Boc C=O), 125.8 (C-2), 125.4 (C-2), 105.8 (C-3), 105.3 (C-3), 80.6 (Boc CMe<sub>3</sub>), 80.5 (Boc CMe<sub>3</sub>), 42.7 (C-6), 41.6 (C-6), 28.5 (Boc CMe<sub>3</sub>), 21.9, 21.6, 21.5 (C-4 and C-5) (15 out of 16 signals present); HRMS found  $2\text{MNa}^+$ , 389.2399.  $\text{C}_{20}\text{H}_{34}\text{N}_2\text{O}_4\text{Na}$  requires 389.2411. Spectroscopic data are consistent with those reported in the literature.<sup>4</sup>

***tert*-Butyl 3-((2-ethoxy-2-oxoethyl)amino)-3-methylpiperidine-1-carboxylate 5d<sup>9,10</sup>**

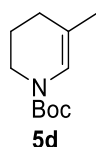

To a stirred solution of DIPA (1.5 mL, 11.0 mmol) in Et<sub>2</sub>O (20 mL) was added *n*-BuLi (6.9 mL of a 1.6 M solution in hexanes, 11.0 mmol) dropwise at 0 °C to 5 °C under N<sub>2</sub>. The solution was stirred for 15 min and then cooled to –78 °C whereupon addition of *tert*-butyl 2-oxopiperidine-1-carboxylate (2.00 g, 10.0 mmol) in Et<sub>2</sub>O (20 mL) was performed by syringe addition. The solution was stirred at –78 °C for 1 h before iodomethane (0.93 mL, 15.0 mmol) was added dropwise at –50 °C. The solution was then slowly warmed to –20 °C and stirred for 30 min. Sat. NH<sub>4</sub>Cl<sub>(aq)</sub> (20 mL) was then added and the layers separated. The aqueous layer was then extracted with Et<sub>2</sub>O (3 × 20 mL), and the organics washed with sat. NH<sub>4</sub>Cl<sub>(aq)</sub> (2 × 20 mL), dried (MgSO<sub>4</sub>) and the solvent then evaporated under reduced pressure to give the crude product. The crude product was purified by flash column chromatography eluting with 9:1 hexane–EtOAc to yield impure *lactam* (562 mg) as a yellow oil. Super-Hydride® (2.7 mL of a 1 M solution in THF, 2.67 mmol) was added dropwise to a solution of the *lactam* (541 mg, 2.54 mmol) in toluene (9.4 mL) at –78 °C and the mixture stirred for 30 min at –78 °C. Then, DIPEA (2.5 mL, 14.5

mmol), DMAP (6.2 mg, 2 mol%) and TFAA (0.42 mL, 3.05 mmol) were added and the resultant mixture was allowed to warm to room temperature and stirred for 16 h at room temperature. Then, water (10 mL) was added and the two layers were separated and the aqueous layer was extracted with DCM (2 × 10 mL). The organic layers were combined and washed with water (2 × 20 mL), dried (MgSO<sub>4</sub>) and the solvent evaporated under reduced pressure to give a crude product. The crude product was purified by flash column chromatography eluting with 95:5 hexane–EtOAc to yield the enecarbamate **5d** as a 60:40 mixture of rotamers (297 mg, 15% over two steps) as a yellow oil, *R<sub>f</sub>* 0.46 (80:20 hexane–EtOAc);  $\nu_{\max}/\text{cm}^{-1}$  2975, 2928, 2877, 1695 (C=O), 1674 (C=O), 1452, 1393, 1253, 1154, 1110, 981 and 764;  $\delta_{\text{H}}$  (500 MHz, CDCl<sub>3</sub>) 6.59 (0.4H, br s, 2-H), 6.43 (0.6H, br s, 2-H), 3.46–3.34 (2H, m, 6-H<sub>2</sub>), 1.91–1.84 (2H, m, 4-H<sub>2</sub>), 1.77–1.69 (2H, br m, 5-H<sub>2</sub>), 1.60 (3H, br s, Me), 1.41 (9H, s, Boc CMe<sub>3</sub>);  $\delta_{\text{C}}$  (125 MHz, CDCl<sub>3</sub>) 152.9 (Boc C=O), 152.5 (Boc C=O), 120.5 (C-2), 120.2 (C-2), 114.7 (C-3), 114.2 (C-3), 80.4 (Boc CMe<sub>3</sub>), 80.2 (Boc CMe<sub>3</sub>), 42.1 (C-6), 41.0 (C-6), 28.5 (Boc CMe<sub>3</sub>), 27.2 (C-4), 26.9 (C-4), 22.1 (C-5), 21.0 (C-5), 21.14 (Me), 21.09 (Me) (17 out of 18 signals present); Spectroscopic data are consistent with those reported in the literature.<sup>9</sup>

### **tert-Butyl azepane-1-carboxylate S3**

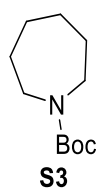

Boc<sub>2</sub>O (4.6 mL, 20 mmol) was added to a solution of azepane (2.3 mL, 20 mmol) in DCM (70 mL) and stirred at rt for 72 h. The solvent was then evaporated under reduced pressure to yield carbamate **S3** as a 1:1 mixture of rotamers (3.98 g, 100%) as a yellow oil;  $\nu_{\max}/\text{cm}^{-1}$  2974, 2927, 2857, 1687 (C=O), 1413, 1160, 1115, 964 and 770;  $\delta_{\text{H}}$  (400 MHz, CDCl<sub>3</sub>) 3.37 (2H, app. t, *J* 6.1, 2-H<sub>2</sub>, 7-H<sub>2</sub>), 3.31 (2H, app. t, *J* 6.1, 2-

H<sub>2</sub>, 7-H<sub>2</sub>), 1.71–1.58 (4H, br m, 3-H<sub>2</sub>, 6-H<sub>2</sub>), 1.57–1.48 (4H, br m, 4-H<sub>2</sub>, 5-H<sub>2</sub>), 1.45 (9H, s, Boc CMe<sub>3</sub>);  $\delta_{\text{C}}$  (100 MHz, CDCl<sub>3</sub>) 155.8 (Boc C=O), 79.0 (Boc CMe<sub>3</sub>), 47.1 (C-2, C-7), 46.7 (C-2, C-7), 28.7 (Boc CMe<sub>3</sub>), 28.6 (Boc CMe<sub>3</sub>), 27.6 (C-3, C-6), 27.0 (C-4, C-5), (8 out of 12 signals present); HRMS found MNa<sup>+</sup>, 221.1461. C<sub>11</sub>H<sub>21</sub>NO<sub>2</sub>Na requires 221.1465. Spectroscopic data are consistent with those reported in the literature.<sup>11</sup>

### ***tert*-Butyl 2,3,4,5-tetrahydro-1H-azepine-1-carboxylate **5e****

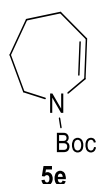

Compound **5e** was synthesised using general method A using Boc protected amine **S2** (3.00 g, 15.1 mmol), anhydrous methanol (20 mL), tetraethylammonium tosylate (249 mg, 0.42 mmol), toluene (20 mL) and NH<sub>4</sub>Cl (161 mg, 20 mol%). Reflux was carried out for 4 h. The crude product was purified by flash column chromatography eluting with 95:5 hexane–EtOAc to yield the enecarbamate **5e** as an undetermined mixture of rotamers (2.05 g, 69%) as a colourless oil, *R<sub>f</sub>* 0.69 (80:20 hexane–EtOAc);  $\nu_{\text{max}}/\text{cm}^{-1}$  2976, 2930, 2863, 1698 (C=O), 1650, 1365, 1217, 1115, 1073, 1012, 858, 768 and 721;  $\delta_{\text{H}}$  (400 MHz, CDCl<sub>3</sub>) 6.60–6.37 (1H, m, 2-H), 5.07–4.86 (1H, m, 3-H), 3.69–3.58 (2H, m, 7-H<sub>2</sub>), 2.17 (2H, app. ddd, *J* 11.6, 5.4, 1.5, 4-H<sub>2</sub>), 1.82–1.63 (4H, m, 5-H<sub>2</sub>, 6-H<sub>2</sub>), 1.48 (9H, s, Boc CMe<sub>3</sub>);  $\delta_{\text{C}}$  (100 MHz, CDCl<sub>3</sub>) 152.1 (Boc C=O), 130.8 (C-2), 114.2 (C-3), 80.4 (Boc CMe<sub>3</sub>), 47.1 (C-7), 47.0 (C-7), 28.5 (Boc CMe<sub>3</sub>), 28.2 (6), 26.4 (C-4), 25.4 (5) (10 out of 18 signals present); HRMS found MNa<sup>+</sup>, 220.1304. C<sub>11</sub>H<sub>19</sub>NO<sub>2</sub>Na requires 220.1308. Spectroscopic data are consistent with those reported in the literature.<sup>4</sup>



## 4. Synthesis of Bicyclic Lactams

### *tert*-Butyl 3-((2-ethoxy-2-oxoethyl)amino)pyrrolidine-1-carboxylate **S4**

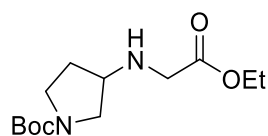

**S4**

**S4** was synthesised using general method B using *N*-Boc-2,3-dihydro-1H-pyrrole (42.3 mg, 0.25 mmol, supplier: Sigma Aldrich) and glycine ethyl ester hydrochloride (70.0 mg, 0.50 mmol). Reaction was performed in duplicate and the contents of the two vials combined before work-up. The crude product was purified by flash column chromatography eluting with 1:1 hexane–EtOAc to yield amino ester **S4** as a 1:1 mixture of rotamers (77.2 mg, 57%) as a yellow oil,  $R_f$  0.27 (EtOAc);  $\nu_{\max}/\text{cm}^{-1}$  2976, 2934, 2879, 1738 (C=O), 1693 (C=O), 1404, 1168, 1114 and 772;  $\delta_{\text{H}}$  (500 MHz,  $\text{CDCl}_3$ ) 4.19 (2H, q,  $J$  7.1 Hz, 10- $\text{H}_2$ ), 3.54–3.42 (2H, m, 2- $\text{H}_A$ , 5- $\text{H}_A$ ), 3.42–3.38 (2H, m, 7- $\text{H}_2$ ), 3.38–3.33 (1H, m, 5- $\text{H}_B$ ), 3.32–3.28 (1H, m, 3-H), 3.15 (0.5H, dd,  $J$  10.9, 4.3, 2- $\text{H}_B$ ), 3.08 (0.5H, dd,  $J$  10.8, 5.0, 2- $\text{H}_B$ ), 2.01 (1H, app. td,  $J$  12.9, 6.2, 4- $\text{H}_A$ ), 1.73 (1H, app. dd,  $J$  11.7, 5.4, 4- $\text{H}_B$ ), 1.66 (1H, br s, NH), 1.45 (9H, s,  $\text{C}(\text{Me})_3$ ), 1.28 (3H, t,  $J$  7.1 Hz, 11- $\text{H}_3$ );  $\delta_{\text{C}}$  (125 MHz,  $\text{CDCl}_3$ ) 172.5 (C=O C-8), 154.8 (C=O Boc), 154.7 (C=O Boc), 79.3 ( $\text{C}(\text{Me})_3$ ), 61.1 (C-10), 57.4 (C-3), 56.6 (C-3), 52.0 (C-2), 51.4 (C-2), 49.4 (C-7), 49.3 (C-7), 44.5 (C-5), 44.1 (C-5), 32.1 (C-4), 31.4 (C-4), 28.7 ( $\text{C}(\text{Me})_3$ ), 14.4 (C-11) (17 out of 22 signals present); HRMS found  $\text{MH}^+$ , 273.1809.  $\text{C}_{13}\text{H}_{25}\text{N}_2\text{O}_4$  requires 273.1809. Spectroscopic data are consistent with those reported in the literature.<sup>12</sup>

**tert-Butyl 3-(((benzyloxy)carbonyl)(2-ethoxy-2-oxoethyl)amino)pyrrolidine-1-carboxylate 9a**

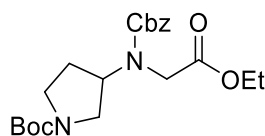

**9a**

**9a** was synthesised using general method C using benzyl chloroformate (43  $\mu\text{L}$ , 0.304 mmol), amino ester **S4** (75.0 mg, 0.276 mmol) and  $\text{NaHCO}_3$  (139 mg, 1.66 mmol) in DCM (3 mL) for 16 h. The crude product was purified by flash column chromatography, eluting with 1:1 hexane–EtOAc to yield *carbamate 9a* as a 60:40 mixture of rotamers (105 mg, 94%) as a colourless oil,  $R_f$  0.37 (1:1 hexane-EtOAc);  $\nu_{\text{max}}/\text{cm}^{-1}$  2977, 2877, 1750 (C=O), 1694 (C=O), 1404, 1365, 1198, 1169, 1135, 771 and 643;  $\delta_{\text{H}}$  (500 MHz,  $\text{CDCl}_3$ ) 7.40–7.27 (5H, m, Ph), 5.17 (0.8H, br s, Cbz  $\text{CH}_2$ ), 5.13 (1.2H, br s, Cbz  $\text{CH}_2$ ), 4.86–4.75 (0.6H, br m, 3-H), 4.70–4.59 (0.4H, br m, 3-H), 4.26–4.15 (0.8H, br m, 10- $\text{H}_2$ ), 4.15–4.06 (1.2H, br m, 10- $\text{H}_2$ ), 4.04–3.81 (2H, m, 7- $\text{H}_2$ ), 3.61 (1H, dd,  $J$  11.3, 7.9, 2- $\text{H}_A$ ), 3.53–3.36 (1H, br m, 5- $\text{H}_A$ ), 3.35–3.21 (1H, br m, 5- $\text{H}_B$ ), 3.20–3.09 (1H, dd, br m, 2- $\text{H}_B$ ), 2.16–2.04 (1H, br m, 4- $\text{H}_B$ ), 1.95–1.83 (1H, br m, 4- $\text{H}_B$ ), 1.44 (9H, s,  $\text{C}(\text{Me})_3$ ), 1.30–1.22 (1.2H, br m, 11- $\text{H}_3$ ), 1.22–1.13 (1.8H, br m, 11- $\text{H}_3$ );  $\delta_{\text{C}}$  (125 MHz,  $\text{CDCl}_3$ ) 170.0 (C=O C-8), 154.8 (C=O Cbz), 154.5 (C=O Boc), 136.3 (*ipso*-Ph), 128.7 (Ph), 128.6 (Ph), 128.4 (Ph), 128.3 (Ph), 128.2 (Ph), 128.0 (Ph), 79.8 ( $\text{C}(\text{Me})_3$ ), 68.0 (Cbz  $\text{CH}_2$ ), 67.8 (Cbz  $\text{CH}_2$ ), 61.5 (C-10), 55.3 (C-3), 54.6 (C-3), 55.3 (C-2), 54.6 (C-2), 45.5 (C-7), 45.2 (C-7), 44.5 (C-5), 43.9 (C-5), 28.6 ( $\text{C}(\text{Me})_3$ ), 28.5 (C-4), 14.2 (C-11) (25 out of 34 signals present); HRMS found  $\text{MH}^+$ , 407.2172.  $\text{C}_{21}\text{H}_{31}\text{N}_2\text{O}_6$  requires 407.2177.

**tert-Butyl 3a-((2-ethoxy-2-oxoethyl)amino)octahydro-2H-isoindole-2-carboxylate**  
**cis-S5**

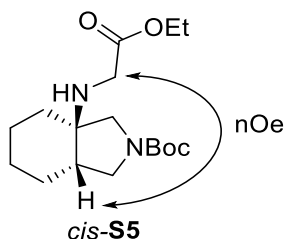

*Cis-S5* was synthesised using general method B using enecarbamate **5b** (55.8 mg, 0.25 mmol) and glycine ethyl ester hydrochloride (70.0 mg, 0.50 mmol). Reaction was performed in triplicate and the contents of the three vials combined before work-up. The crude product was purified by flash column chromatography eluting with 1:1 hexane–EtOAc to yield *amino ester cis-S5* as a 1:1 mixture of rotamers (138 mg, 56%) as a yellow oil,  $R_f$  0.34 (1:1 hexane-EtOAc);  $\nu_{\max}/\text{cm}^{-1}$  2975, 2929, 2857, 1738 (C=O), 1694 (C=O), 1392, 1365, 1172, 1097, 881 and 772;  $\delta_{\text{H}}$  (500 MHz, CDCl<sub>3</sub>) 4.19 (1H, q,  $J$  7.1 Hz, 14-H<sub>2</sub>), 4.18 (1H, q,  $J$  7.1 Hz, 14-H<sub>2</sub>), 3.54–3.46 (1H, m, 9-H<sub>A</sub>), 3.40 (1H, d,  $J$  16.9, 11-H<sub>A</sub>), 3.35–3.28 (1.5H, m, 2-H<sub>A</sub>, 11-H<sub>B</sub>), 3.27–3.21 (1H, m, 2-H<sub>A</sub>, 9-H<sub>B</sub>), 3.19–3.12 (1H, m, 2-H<sub>B</sub>, 9-H<sub>B</sub>), 3.09 (0.5H, d,  $J$  10.8, 2-H<sub>B</sub>), 1.98 (1H, app. q,  $J$  6.8, 8-H), 1.80 (1H, br s, NH), 1.68 (1H, app. dt,  $J$  12.7, 8.5, 4-H<sub>A</sub>), 1.61–1.49 (4H, m, 5-H<sub>2</sub>, 6-H<sub>2</sub>), 1.45 (4.5H, s, C(Me)<sub>3</sub>), 1.45 (4.5H, s, C(Me)<sub>3</sub>), 1.40–1.31 (3H, m, 4-H<sub>B</sub>, 7-H<sub>2</sub>), 1.27 (1.5H, t,  $J$  7.1 Hz, 15-H<sub>3</sub>), 1.27 (1.5H, t,  $J$  7.1 Hz, 15-H<sub>3</sub>);  $\delta_{\text{C}}$  (125 MHz, CDCl<sub>3</sub>) 172.9 (C=O C-12), 172.8 (C=O C-12), 155.4 (C=O Boc), 155.3 (C=O Boc), 79.34 (C(Me)<sub>3</sub>), 79.32 (C(Me)<sub>3</sub>), 61.2 (C-14), 60.5 (C-3), 59.9 (C-3), 54.6 (C-2), 53.4 (C-2), 49.7 (C-9), 48.9 (C-9), 44.8 (C-11), 44.7 (C-11), 42.5 (C-8), 41.2 (C-8), 29.71 (C-4), 29.68 (C-4), 28.7 (C(Me)<sub>3</sub>), 25.7 (C-7), 25.1 (C-7), 22.5, 22.2, 22.02, 21.96 (C-5, C-6), 14.3 (C-15) (27 out of 30 signals present); HRMS found  $\text{MNa}^+$ , 349.2098. C<sub>17</sub>H<sub>30</sub>N<sub>2</sub>O<sub>4</sub>Na requires 349.2098. The stereochemistry was assigned through positive NOESY interaction between 8-H and 11-H<sub>2</sub>.

***tert*-Butyl 3a-(((benzyloxy)carbonyl)(2-ethoxy-2-oxoethyl)amino)octahydro-2H-isoindole-2-carboxylate *cis*-9b**

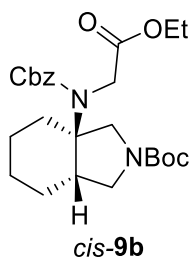

*Cis*-**9b** was synthesised using general method C using benzyl chloroformate (66  $\mu$ L, 0.465 mmol), amino ester *cis*-**S5** (138 mg, 0.423 mmol) and  $\text{NaHCO}_3$  (212 mg, 2.54 mmol) in DCM (4 mL) for 72 h. The crude product was purified by flash column chromatography, eluting with 8:2 hexane–EtOAc to yield *carbamate cis*-**9b** as a 60:40 mixture of rotamers (133 mg, 68%) as a pale yellow oil,  $R_f$  0.50 (1:1 hexane–EtOAc);  $\nu_{\text{max}}/\text{cm}^{-1}$  2976, 2931, 2863, 1749, 1691 (C=O), 1393, 1365, 1174, 1128, 1100, 774 and 698;  $\delta_{\text{H}}$  (500 MHz,  $\text{CDCl}_3$ ) 7.39–7.28 (5H, m, Ph), 5.22–4.98 (2H, m, Cbz  $\text{CH}_2$ ), 4.45–4.19 (1H, m, 2- $\text{H}_A$ ), 4.07–4.15 (2H, m 14- $\text{H}_2$ ), 4.00–3.72 (2H, m, 2- $\text{H}_B$ , 11- $\text{H}_A$ ), 3.57 (1H, d,  $J$  15.8, 11- $\text{H}_B$ ), 3.49–3.40 (1H, m, 9- $\text{H}_A$ ), 3.25 (0.6H, dd,  $J$  10.8, 7.3, 9- $\text{H}_B$ ), 3.14 (0.4H, dd,  $J$  10.7, 5.0, 9- $\text{H}_B$ ), 2.70–2.54 (0.4H, m, 8- $\text{H}$ ), 2.52–2.41 (0.6H, m, 8- $\text{H}$ ), 1.75–1.61 (2H, m, 4- $\text{H}_2$  or 5- $\text{H}_2$ , 6- $\text{H}_2$  or 7 $\text{H}_2$ ), 1.53–1.47 (2H, m, 4- $\text{H}_2$  or 5- $\text{H}_2$ , 6- $\text{H}_2$  or 7 $\text{H}_2$ ), 1.45 (4.5H, s,  $\text{C}(\text{Me})_3$ ), 1.44 (4.5H s,  $\text{C}(\text{Me})_3$ ), 1.40–1.33 (2H, m, 4- $\text{H}_2$  or 5- $\text{H}_2$ , 6- $\text{H}_2$  or 7 $\text{H}_2$ ), 1.33–1.24 (2H, m, 4- $\text{H}_2$  or 5- $\text{H}_2$ , 6- $\text{H}_2$  or 7 $\text{H}_2$ ), 1.24–1.12 (3H, m, 15- $\text{H}_3$ );  $\delta_{\text{C}}$  (125 MHz,  $\text{CDCl}_3$ ) 170.9 (C=O C-12), 170.7 (C=O C-12), 154.8 (C=O Boc or Cbz), 128.6 (Ph), 128.1 (Ph), 128.0 (Ph), 79.64 ( $\text{C}(\text{Me})_3$ ), 79.57 ( $\text{C}(\text{Me})_3$ ), 67.4 (Cbz  $\text{CH}_2$ ), 67.3 (Cbz  $\text{CH}_2$ ), 61.4 (C-14), 61.3 (C-14), 60.6 (C-3), 50.2 (C-9), 48.8 (C-9), 47.0 (C-11), 38.9 (C-8), 28.4 (C-4), 28.6 ( $\text{C}(\text{Me})_3$ ), 26.2 (C-7), 22.3, 21.6 (C-5, C-6), 14.4 (C-15), 14.3 (C-15) (24 out of 42 signals present); HRMS found  $\text{MNa}^+$ , 483.2478.  $\text{C}_{25}\text{H}_{36}\text{N}_2\text{O}_6\text{Na}$  requires 483.2466.

***tert*-Butyl 3-((3-ethoxy-3-oxopropyl)amino)pyrrolidine-1-carboxylate **S6****

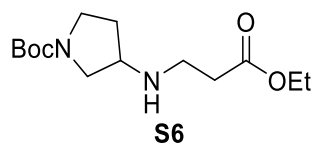

**S6** was synthesised using general method B using *N*-Boc-2,3-dihydro-1H-pyrrole (42.3 mg, 0.25 mmol, supplier: Sigma Aldrich) and ethyl 3-aminopropionate hydrochloride (75.0 mg, 0.50 mmol). Reaction was performed in duplicate and the contents of the two vials combined before work-up. The crude product was purified by flash column chromatography eluting with EtOAc to yield *amino ester* **S6** as a 1:1 mixture of rotamers (89.5 mg, 63%) as a yellow oil,  $R_f$  0.10 (EtOAc);  $\nu_{\max}/\text{cm}^{-1}$  2976, 2932, 2873, 1733 (C=O), 1692 (C=O), 1405, 1167 and 771;  $\delta_{\text{H}}$  (500 MHz,  $\text{CDCl}_3$ ) 4.14 (2H, q,  $J$  7.1 Hz, 11- $\text{H}_2$ ), 3.56 (0.5H, dd,  $J$  10.7, 6.1, 2- $\text{H}_A$ ), 3.52 (0.5H, dd,  $J$  11.2, 4.8, 2- $\text{H}_A$ ), 3.50–3.38 (1H, m, 5- $\text{H}_A$ ), 3.38–3.31 (1H, m, 5- $\text{H}_B$ ), 3.31–3.26 (1H, m, 3-H), 3.10 (0.5H, dd,  $J$  10.7, 5.0, 2- $\text{H}_B$ ), 3.02 (0.5H, dd,  $J$  10.6, 5.7, 2- $\text{H}_B$ ), 2.93–2.82 (2H, m, 7- $\text{H}_2$ ), 2.50 (2H, t,  $J$  6.4, 8- $\text{H}_2$ ), 2.04 (1H, app. td,  $J$  13.0, 5.9, 4- $\text{H}_A$ ), 1.73 (1H, app. d5,  $J$  15.2, 7.3, 4- $\text{H}_B$ ), 1.49 (1H, br s, NH), 1.45 (9H, s,  $\text{C}(\text{Me})_3$ ), 1.26 (3H, t,  $J$  7.1 Hz, 12- $\text{H}_3$ );  $\delta_{\text{C}}$  (125 MHz,  $\text{CDCl}_3$ ) 172.8 (C=O C-9), 154.8 (C=O Boc), 79.3 ( $\text{C}(\text{Me})_3$ ), 60.7 (C-11), 57.8 (C-3), 57.0 (C-3), 52.1 (C-2), 51.7 (C-2), 44.6 (C-5), 44.2 (C-5), 43.5 (C-7), 35.0 (C-8), 32.2 (C-4), 31.5 (C-4), 28.7 ( $\text{C}(\text{Me})_3$ ), 14.4 (C-12) (16 out of 24 signals present); HRMS found  $\text{MH}^+$ , 287.1969.  $\text{C}_{14}\text{H}_{27}\text{N}_2\text{O}_4$  requires 287.1965.

***tert*-Butyl 3-((3-ethoxy-3-oxopropyl)amino)pyrrolidine-1-carboxylate **9c****

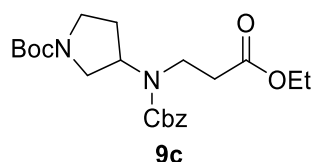

**9c** was synthesised using general method C using benzyl chloroformate (47  $\mu\text{L}$ , 0.327 mmol), amino ester **56** (85.0 mg, 0.297 mmol) and  $\text{NaHCO}_3$  (149 mg, 1.78 mmol) in DCM (3 mL) for 16 h. The crude product was purified by flash column chromatography, eluting with 1:1 hexane–EtOAc to yield *carbamate 9c* as a mixture of rotamers (112 mg, 89%) as a colourless oil,  $R_f$  0.37 (1:1 hexane–EtOAc);  $\nu_{\text{max}}/\text{cm}^{-1}$  2978, 2894, 1733 (C=O), 1694 (C=O), 1404, 1168, 1132 and 771;  $\delta_{\text{H}}$  (500 MHz,  $\text{CDCl}_3$ ) 7.39–7.30 (5H, m, Ph), 5.15 (2H, s, Cbz  $\text{CH}_2$ ), 4.66–4.49 (1H, br m, 3-H), 4.11 (2H, q,  $J$  7.0, 11- $\text{H}_2$ ), 3.64–3.41 (4H, m, 2- $\text{H}_A$ , 5- $\text{H}_A$ , 7- $\text{H}_2$ ), 3.31–3.09 (2H, m, 2- $\text{H}_B$ , 5- $\text{H}_B$ ), 2.66–2.47 (2H, br m, 8- $\text{H}_2$ ), 2.05–1.97 (2H, br m, 4- $\text{H}_2$ ), 1.45 (9H, s,  $\text{C}(\text{Me})_3$ ), 1.24 (3H, t,  $J$  6.9 Hz, 12- $\text{H}_3$ );  $\delta_{\text{C}}$  (125 MHz,  $\text{CDCl}_3$ ) 171.5 (C=O C-9), 155.9 (C=O Cbz), 154.8 (C=O Boc), 136.5 (*ipso*-Ph), 128.7 (Ph), 128.3 (Ph), 128.1 (Ph), 79.7 ( $\text{C}(\text{Me})_3$ ), 67.6 (Cbz  $\text{CH}_2$ ), 60.8 (C-11), 55.9 (C-3), 55.1 (C-3), 47.5 (C-2), 44.4 (C-5), 43.9 (C-5), 40.3 (C-7), 34.9 (C-8), 29.1 (C-4), 28.6 ( $\text{C}(\text{Me})_3$ ), 14.3 (C-12) (20 out of 36 signals present); HRMS found  $\text{MH}^+$ , 421.2331.  $\text{C}_{22}\text{H}_{33}\text{N}_2\text{O}_6$  requires 421.2333.

### Benzyl 2-oxo-1,5-diazabicyclo[4.2.1]nonane-5-carboxylate **6c**

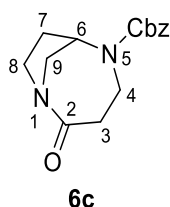

**6c** was synthesised using general method D using NaOH (11.5 mg, 0.288 mmol), amino ester **9c** (110 mg, 0.262 mmol), 1:1 MeOH:water (4.4 mL), HCl (2.9 mL, 6 N), EtOAc (0.4 mL), toluene (3.5 mL) and *n*- $\text{Bu}_2\text{SnO}$  (65.7 mg). The crude product was purified by flash column chromatography, eluting with EtOAc to yield *bicyclic carbamate 6c* as a 1:1 mixture of rotamers (22.4 mg, 31%) as a colourless oil,  $R_f$  0.31 (EtOAc);  $\nu_{\text{max}}/\text{cm}^{-1}$  2928, 1680 (C=O), 1406, 1262, 1217, 1098, 1008, 771 and 699;  $\delta_{\text{H}}$  (500 MHz,  $\text{CDCl}_3$ ) 7.39–7.30 (5H, m, Ph), 5.18–5.01 (2H, s, Cbz  $\text{CH}_2$ ), 4.73–4.50 (1H, m, 6-H), 4.22 (0.5H, dt,  $J$  9.0, 2.8 8- $\text{H}_A$ ), 4.20 (0.5H, dt,  $J$  9.0, 2.8 8- $\text{H}_A$ ), 3.99–3.86

(2H, m, 4-H<sub>A</sub>, 9-H<sub>A</sub>), 3.74–3.60 (1H, m, 4-H<sub>B</sub>), 3.09 (1H, ddd, *J* 14.6, 8.1, 6.9, 3-H<sub>A</sub>), 2.89–2.73 (2H, m, 5-H<sub>B</sub>, 9-H<sub>B</sub>), 2.61–2.45 (1H, m, 3-H<sub>B</sub>), 2.20–2.10 (1H, m, 7-H<sub>2</sub>), 2.09–1.55 (1H, m, 7-H<sub>2</sub>);  $\delta_{\text{C}}$  (125 MHz, CDCl<sub>3</sub>) 182.1 (C=O C-2), 182.0 (C=O C-2), 156.4 (C=O Cbz), 156.2 (C=O Cbz), 136.3 (*ipso*-Ph), 128.7 (Ph), 128.4 (Ph), 128.2 (Ph), 67.8 (CH<sub>2</sub> Cbz), 54.3 (C-6), 54.0 (C-6), 53.5 (C-9), 49.5 (C-8), 40.1 (C-4), 36.6 (C-3), 33.0 (C-7), 32.1 (C-7) (17 out of 26 signals present); HRMS found MH<sup>+</sup>, 275.1389. C<sub>15</sub>H<sub>19</sub>N<sub>2</sub>O<sub>3</sub> requires 275.1390.

***tert*-Butyl 3-((*N*-(3-ethoxy-3-oxopropyl)-4-methylphenyl)sulfonamido)pyrrolidine-1-carboxylate **9d****

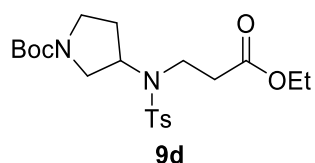

Tosyl chloride (195 mg, 0.341 mmol), DIPEA (169  $\mu$ L, 0.341 mmol) and DMAP (4.1 mg, 5 mol%) were added in sequence to a mixture of amino ester **S6** (195 mg, 0.681 mmol) in DCM (7 mL). The mixture was stirred for 16 h at room temperature, and the solvent evaporated under reduced pressure to give a crude product. The crude product was purified by flash column chromatography, eluting with 1:1 hexane–EtOAc to yield *carbamate* **9d** as a 1:1 mixture of rotamers (287 mg, 96%) as a yellow oil, *R<sub>f</sub>* 0.31 (6:4 hexane–EtOAc);  $\nu_{\text{max}}/\text{cm}^{-1}$  2978, 2933, 2884, 1731 (C=O), 1694 (C=O), 1402, 1344, 1157, 1108, 663 and 548;  $\delta_{\text{H}}$  (500 MHz, CDCl<sub>3</sub>) 7.75–7.66 (2H, m, Ar), 7.35–7.27 (2H, m, Ar), 4.52–4.42 (0.5H, br m, 3-H), 4.42–4.32 (0.5H, br m, 3-H), 4.14 (2H, q, *J* 7.1, 11-H<sub>2</sub>), 3.52–3.26 (4H, m, 2-H<sub>A</sub>, 5-H<sub>A</sub>, 7-H<sub>2</sub>), 3.21–3.11 (1H, m, 5-H<sub>B</sub>), 2.96–2.85 (1H, m, 2-H<sub>B</sub>), 2.85–2.67 (2H, br m, 8-H<sub>2</sub>), 2.44 (3H, s, Me), 2.05–1.95 (0.5H, br m, 4-H<sub>2</sub>), 1.91–1.80 (1H, br m, 4-H<sub>2</sub>), 1.80–1.71 (0.5H, br m, 4-H<sub>2</sub>), 1.42 (9H, s, C(Me)<sub>3</sub>), 1.26 (3H, t, *J* 7.1, 12-H<sub>3</sub>);  $\delta_{\text{C}}$  (125 MHz, CDCl<sub>3</sub>) 171.4 (C=O C-9), 144.0 (*ipso*-Ar), 135.7 (*ipso*-Ar), 135.6 (*ipso*-Ar), 130.1 (Ar), 127.8 (Ar), 79.9 (C(Me)<sub>3</sub>), 60.9 (C-11), 56.7 (C-3), 56.1 (C-3), 47.6 (C-2), 46.4 (C-2), 43.9 (C-5), 43.5 (C-

5), 39.84 (C-7), 39.75 (C-7), 36.72 (C-8), 36.65 (C-8), 29.4 (C-4), 27.9 (C-4), 28.5 (C(Me)<sub>3</sub>), 21.7 (Me), 14.3 (C-12) (23 out of 34 signals present); HRMS found MNa<sup>+</sup>, 463.1877. C<sub>21</sub>H<sub>32</sub>N<sub>2</sub>O<sub>6</sub>SNa requires 463.1873.

### 5-Tosyl-1,5-diazabicyclo[4.2.1]nonan-2-one **6d**

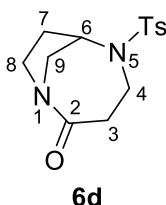

**6d** was synthesised using general method D using NaOH (27.9 mg, 0.700 mmol), amino ester **9d** (280 mg, 0.636 mmol), 1:1 MeOH:water (10 mL), HCl (7 mL, 6 N), EtOAc (1 mL), toluene (8 mL) and *n*-Bu<sub>2</sub>SnO (159 mg). The crude product was purified by flash column chromatography, eluting with EtOAc to yield *bicyclic sulfonamide 6d* (39.4 mg, 21%) as a colourless oil, *R<sub>f</sub>* 0.38 (EtOAc);  $\nu_{\max}/\text{cm}^{-1}$  3061, 2925, 1682, 1639 (C=O), 1598, 1442, 1338, 1158, 1091, 662 and 549;  $\delta_{\text{H}}$  (500 MHz, CDCl<sub>3</sub>) 7.62 (2H, d, *J* 8.3, Ar), 7.31 (2H, d, *J* 8.0, Ar), 4.69–4.60 (1H, m, 6-H), 4.05 (1H, ddt, *J* 11.7, 9.0, 2.5, 8-H<sub>A</sub>), 2.92 (1H, app. dt, *J* 13.8, 4.6, 4-H<sub>B</sub>), 3.76 (1H, d, *J* 14.2, 9-H<sub>A</sub>), 3.15 (1H, ddd, *J* 13.9, 11.1, 3.9, 3-H<sub>A</sub>), 2.88 (1H, ddd, *J* 13.9, 11.1, 2.9, 4-H<sub>B</sub>), 2.81–2.71 (2H, m, 8-H<sub>B</sub>, 9-H<sub>B</sub>), 2.46–2.42 (1H, m, 3-H<sub>B</sub>), 2.42 (3H, s, Me), 1.91 (1H, app. dtd, *J* 14.6, 8.3, 2.3, 7-H<sub>2</sub>), 1.44 (1H, app. dtt, *J* 14.5, 8.9, 1.7, 7-H<sub>2</sub>);  $\delta_{\text{C}}$  (125 MHz, CDCl<sub>3</sub>) 183.1 (C=O C-2), 144.1 (*ipso*-Ar), 135.7 (*ipso*-Ar), 130.1 (Ar), 127.3 (Ar), 54.8 (C-9), 54.5 (C-6), 51.1 (C-8), 41.7 (C-4), 37.7 (C-3), 29.5 (C-7) 21.7 (Me); HRMS found MNa<sup>+</sup>, 317.0939. C<sub>14</sub>H<sub>18</sub>N<sub>2</sub>O<sub>3</sub>SNa requires 317.0930.



**tert-Butyl  
carboxylate *cis*-S7**

**3a-((3-ethoxy-3-oxopropyl)amino)octahydro-2H-isoindole-2-**

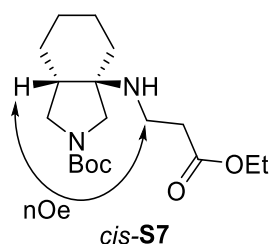

*Cis*-S7 was synthesised using general method B using enecarbamate **5b** (55.8 mg, 0.25 mmol) and ethyl 3-aminopropionate hydrochloride (75.0 mg, 0.50 mmol). The crude product was purified by flash column chromatography eluting with EtOAc to yield *amino ester cis*-S7 as a 1:1 mixture of rotamers (37.9 mg, 45%) as a yellow oil,  $R_f$  0.20 (1:1 hexane-EtOAc);  $\nu_{\max}/\text{cm}^{-1}$  2976, 2931, 2858, 1733 (C=O), 1694 (C=O), 1042, 1366, 1174, 1155, 1101, 844 and 769;  $\delta_{\text{H}}$  (500 MHz,  $\text{CDCl}_3$ ) 4.13 (1H, q,  $J$  7.1 Hz, 15- $\text{H}_2$ ), 4.12 (1H, q,  $J$  7.1 Hz, 15- $\text{H}_2$ ), 3.50–3.41 (1H, m, 9- $\text{H}_A$ ), 3.32 (0.5H, d,  $J$  10.8, 2- $\text{H}_A$ ), 3.26–3.20 (1H, m, 2- $\text{H}_A$ , 9- $\text{H}_B$ ), 3.19–3.08 (1.5H, m, 2- $\text{H}_B$ , 9- $\text{H}_B$ ), 2.86 (1H, dt,  $J$  11.4, 5.3, 11- $\text{H}_A$ ), 2.69 (1H, dt,  $J$  11.4, 5.3, 11- $\text{H}_B$ ), 2.45 (2H, app. td,  $J$  6.3, 4.1, 12- $\text{H}_2$ ), 1.98 (1H, app. dd,  $J$  12.7, 6.3, 8-H), 1.67–1.56 (2H, m, 4- $\text{H}_A$ , 7- $\text{H}_A$ ), 1.56–1.47 (3H, m, NH, 5-H/6-H), 1.46–1.42 (9H, m, 5-H/6-H,  $\text{C}(\text{Me})_3$ ), 1.40–1.30 (3H, m, 5-H/6-H, 7- $\text{H}_B$ ), 1.25 (1.5H, t,  $J$  7.1 Hz, 16- $\text{H}_3$ ), 1.25 (1.5H, t,  $J$  7.1 Hz, 16- $\text{H}_3$ );  $\delta_{\text{C}}$  (125 MHz,  $\text{CDCl}_3$ ) 172.99 (C=O C-13), 172.95 (C=O C-13), 155.39 (C=O Boc), 155.38 (C=O Boc), 79.22 ( $\text{C}(\text{Me})_3$ ), 79.19 ( $\text{C}(\text{Me})_3$ ), 60.6 (C-15), 60.5 (C-15), 60.4 (C-3), 59.8 (C-3), 55.1 (C-2), 54.2 (C-2), 49.4 (C-9), 48.7 (C-9), 42.1 (C-8), 41.1 (C-8), 38.1 (C-11), 38.0 (C-11), 35.83 (C-12), 35.82 (C-12), 29.5 (C-4), 29.4 (C-4), 28.7 ( $\text{C}(\text{Me})_3$ ), 25.2 (C-7), 24.9 (C-7), 22.3, 22.1, 22.0, 21.9 (C-5, C-6), 14.4 (C-16) (30 out of 32 signals present); HRMS found  $\text{MH}^+$ , 341.2437.  $\text{C}_{18}\text{H}_{33}\text{N}_2\text{O}_4$  requires 341.2435. The stereochemistry was assigned through positive NOESY interaction between 8-H and 11- $\text{H}_2$ .

**tert-Butyl 3a-(((benzyloxy)carbonyl)(3-ethoxy-3-oxopropyl)amino)octahydro-2H-isoindole-2-carboxylate *cis*-9e**

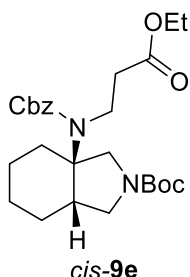

*Cis*-9e was synthesised using general method C using benzyl chloroformate (16  $\mu$ L, 0.109 mmol), amino ester *cis*-S7 (33.6 mg, 99.0  $\mu$ mol) and NaHCO<sub>3</sub> (50.0 mg, 0.594 mmol) in DCM (1 mL) for 72 h. The crude product was purified by flash column chromatography, eluting with 8:2 hexane–EtOAc to yield *carbamate cis*-9e as a 60:40 mixture of rotamers (43.0 mg, 92%) as a pale yellow oil,  $R_f$  0.56 (1:1 hexane–EtOAc);  $\nu_{\max}/\text{cm}^{-1}$  2975, 2930, 1733, 1691 (C=O), 1397, 1365, 1165, 1126, 1097, 774 and 698;  $\delta_H$  (500 MHz, CDCl<sub>3</sub>) 7.38–7.28 (5H, m, Ph), 5.18–5.07 (2H, Cbz CH<sub>2</sub>), 4.10 (1.2H, q,  $J$  7.1 Hz, 15-H<sub>2</sub>), 4.08 (0.8H, q,  $J$  7.1 Hz, 15-H<sub>2</sub>), 3.84–3.75 (1H, m, 11-H<sub>A</sub>), 3.73 (0.4H, d,  $J$  12.5, 2-H<sub>A</sub>), 3.72 (0.6H, d,  $J$  12.5, 2-H<sub>A</sub>), 3.59–3.46 (2H, m, 2-H<sub>B</sub>, 11-H<sub>B</sub>), 3.43 (0.6H, dd,  $J$  10.8, 7.2, 9-H<sub>A</sub>), 3.39 (0.4H, dd,  $J$  10.7, 6.7, 9-H<sub>A</sub>), 3.21 (0.6H, dd,  $J$  10.8, 5.3, 9-H<sub>B</sub>), 3.11 (0.4H, dd,  $J$  10.7, 4.1, 9-H<sub>B</sub>), 3.00–2.92 (0.4H, m, 8-H), 2.89–2.80 (0.6H, m, 8-H), 2.64–2.46 (2H, m, 12-H<sub>2</sub>), 2.35–2.25 (1H, m, 4-H<sub>A</sub>), 1.79–1.69 (1H, m, 7-H<sub>A</sub>), 1.64–1.49 (3H, m, 4-H<sub>B</sub>, 5-H/6-H), 1.48–1.43 (12H, m, 5-H/6-H, 7-H<sub>B</sub> C(Me)<sub>3</sub>), 1.23 (1.8H, t,  $J$  7.1 Hz, 16-H<sub>3</sub>), 1.22 (1.2H, t,  $J$  7.1 Hz, 16-H<sub>3</sub>);  $\delta_C$  (125 MHz, CDCl<sub>3</sub>) 171.4 (C=O C-13), 155.61 (C=O Cbz), 155.56 (C=O Cbz), 154.9 (C=O Boc), 154.8 (C=O Boc), 128.66 (Ph), 128.65 (Ph), 128.14 (Ph), 128.10 (Ph), 127.91 (Ph), 127.86 (Ph), 79.7 (C(Me)<sub>3</sub>), 79.6 (C(Me)<sub>3</sub>), 67.14 (Cbz CH<sub>2</sub>), 67.08 (Cbz CH<sub>2</sub>), 65.9 (C-3), 65.7 (C-3), 60.70 (C-15), 60.66 (C-15), 54.0 (C-2), 52.4 (C-2), 50.4 (C-9), 49.5 (C-9), 40.8 (C-11), 40.7 (C-11), 39.8 (C-8), 38.9 (C-8), 35.7 (C-12), 35.5 (C-12), 29.19 (C-4), 29.16 (C-4), 28.6 (C(Me)<sub>3</sub>), 28.1 (C-7), 27.4 (C-7), 22.9, 22.72, 22.65, 22.3 (C-5, C-6), 14.29 (C-16), 14.25 (C-16) (40 out of 44 signals present); HRMS found  $\text{MNa}^+$ , 497.2631. C<sub>26</sub>H<sub>38</sub>N<sub>2</sub>O<sub>6</sub>Na requires 497.2622.

**Benzyl (6aS\*,10aR\*)-4-oxooctahydro-5,10a-methanobenzo[b][1,5]diazocine-1(2H)-carboxylate 6e**

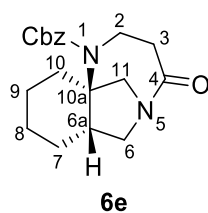

**6e** was synthesised using general method D using NaOH (3.7 mg, 92.7  $\mu\text{mol}$ ), amino ester **9e** (40.0 mg, 84.3  $\mu\text{mol}$ ), 1:1 MeOH:water (2 mL), HCl (1 mL, 6 N), EtOAc (0.2 mL), toluene (1.5 mL) and *n*-Bu<sub>2</sub>SnO (21.1 mg). The crude product was purified by flash column chromatography, eluting with 1:1 EtOAc-hexane to yield *bicyclic carbamate 6e* as a 75:25 mixture of rotamers (6.8 mg, 25%) as a pale yellow oil, *R<sub>f</sub>* 0.38 (EtOAc);  $\nu_{\text{max}}/\text{cm}^{-1}$  2925, 2858, 1680 (C=O), 1400, 1359, 1248, 1101, 1047, 1023, 797 and 697;  $\delta_{\text{H}}$  (500 MHz, CDCl<sub>3</sub>) 7.40–7.28 (5H, m, Ph), 5.14 (1.5H, d, *J* 11.6, Cbz CH<sub>2</sub>), 4.98 (0.5H, d, *J* 12.2, Cbz CH<sub>2</sub>), 4.64–4.40 (0.25H, m, 2-H<sub>A</sub>), 4.39–4.23 (1.75H, m, 2-H<sub>A</sub>, 11-H<sub>A</sub>), 3.68 (1H, app. d, *J* 13.9, 6-H<sub>A</sub>), 3.44–3.28 (1.75H, m, 2-H<sub>A</sub>, 6a-H), 3.23 (1H, app. d, *J* 13.8, 6-H<sub>B</sub>), 3.13–3.02 (0.25H, m, 6a-H), 2.94 (1H, ddd, *J* 14.8, 10.2, 2.8, 3-H<sub>A</sub>), 2.77–2.66 (1H, m, 3-H<sub>B</sub>), 2.61 (1H, d, *J* 12.2, 11-H<sub>B</sub>), 2.25–2.11 (1H, m, 10-H<sub>A</sub>), 2.05–1.90 (2H, m, 7-H<sub>A</sub>, 10-H<sub>B</sub>), 1.81–1.70 (1H, m, 8-H/9-H<sub>A</sub>), 1.65–1.57 (1H, m, 8-H/9-H<sub>A</sub>), 1.49–1.40 (1H, m, 8-H/9-H<sub>A</sub>), 1.21–1.09 (2H, m, 7-H<sub>B</sub>, 9-H<sub>B</sub>);  $\delta_{\text{C}}$  (125 MHz, CDCl<sub>3</sub>) 179.9 (C=O C-4), 155.6 (C=O Cbz), 155.0 (C=O Cbz), 128.8 (Ph), 128.7 (Ph), 128.6 (Ph), 128.5 (Ph), 128.1 (Ph), 127.8 (Ph), 67.0 (Cbz CH<sub>2</sub>), 66.7 (C-10a), 56.1 (C-11), 52.5 (C-6), 39.7 (C-6a), 38.5 (C-2), 35.1 (C-3), 33.4 (C-7), 25.7 (C-10), 23.6 (C-8, C-9) (19 out of 32 signals present); HRMS found MNa<sup>+</sup>, 351.1681. C<sub>18</sub>H<sub>24</sub>N<sub>2</sub>O<sub>3</sub>Na requires 351.1679.

**tert-Butyl 3-((2-ethoxy-2-oxoethyl)amino)piperidine-1-carboxylate **S8****

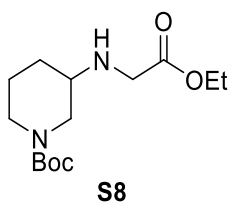

Compound **S8** was synthesised using general method B using enecarbamate **5c** (45.8 mg, 0.25 mmol) and glycine ethyl ester hydrochloride (70.0 mg, 0.50 mmol). The crude product was purified by flash column chromatography eluting with 1:1 hexane–EtOAc to yield amino ester **S8** as a 1:1 mixture of rotamers (59.0 mg, 82%) as a yellow oil,  $R_f$  0.31 (EtOAc);  $\nu_{\max}/\text{cm}^{-1}$  2967, 2932, 2859, 1738 (C=O), 1688 (C=O), 1420, 1365, 1238, 1153, 1026, 844 and 768;  $\delta_{\text{H}}$  (500 MHz,  $\text{CDCl}_3$ ) 4.16 (2H, q,  $J$  7.1 Hz, 11- $\text{H}_2$ ), 4.07–3.78 (1H, m, 2- $\text{H}_A$ ), 3.74 (1H, app. dt,  $J$  13.1, 4.2, 6- $\text{H}_A$ ), 3.43 (1H, d,  $J$  17.3, 8- $\text{H}_A$ ), 3.39 (1H, d,  $J$  17.3, 8- $\text{H}_B$ ), 2.91–2.79 (1H, m, 6- $\text{H}_B$ ), 2.78–2.56 (1H, m, 2- $\text{H}_B$ ), 2.56–2.46 (1H, m, 3-H), 1.92–1.84 (1H, m, 4- $\text{H}_A$ ), 1.73 (1H, br s, NH), 1.70–1.62 (1H, m, 5- $\text{H}_A$ ), 1.46–1.37 (10H, m, 5- $\text{H}_B$ ,  $\text{C}(\text{Me})_3$ ), 1.33–1.27 (1H, m, 4- $\text{H}_B$ ), 1.25 (3H, t,  $J$  7.1 Hz, 12- $\text{H}_3$ );  $\delta_{\text{C}}$  (125 MHz,  $\text{CDCl}_3$ ) 172.6 (C=O C-9), 154.9 (C=O Boc), 79.6 ( $\text{C}(\text{Me})_3$ ), 61.0 (C-11), 53.6 (C-3), 49.4 (C-2), 48.7 (C-2), 48.5 (C-8), 44.7 (C-6), 43.9 (C-6), 31.4 (C-4), 28.5 ( $\text{C}(\text{Me})_3$ ), 23.8 (C-5), 23.4 (C-5), 14.3 (C-12) (15 out of 24 signals present); HRMS found  $\text{MH}^+$ , 287.1965.  $\text{C}_{14}\text{H}_{27}\text{N}_2\text{O}_4$  requires 287.1965. Spectroscopic data are consistent with those reported in the literature.<sup>6</sup>

**tert-Butyl 3-(((benzyloxy)carbonyl)(2-ethoxy-2-oxoethyl)amino)piperidine-1-carboxylate **9f****

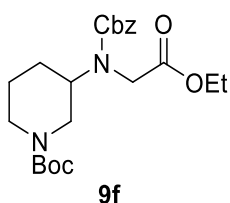

**9f** was synthesised using general method C using benzyl chloroformate (55.0  $\mu\text{L}$ , 0.385 mmol), amino ester **S8** (100 mg, 0.35 mmol) and  $\text{NaHCO}_3$  (175 mg, 2.1 mmol) in DCM (3 mL) for 16 h. The crude product was purified by flash column chromatography, eluting with 1:1 hexane–EtOAc to yield *carbamate* **9f** as a 60:40 mixture of rotamers (120 mg, 82%) as a pale yellow oil,  $R_f$  0.55 (1:1 hexane–EtOAc);  $\nu_{\text{max}}/\text{cm}^{-1}$  2976, 2936, 2860, 1752, 1687 (C=O), 1409, 1364, 1238, 1177, 1149, 1113, 1028, 992, 771 and 698;  $\delta_{\text{H}}$  (500 MHz,  $\text{CDCl}_3$ ) 7.40–7.27 (5H, m, Ph), 5.20 (0.8H, s, Cbz  $\text{CH}_2$ ), 5.12 (1.2H, s, Cbz  $\text{CH}_2$ ), 4.23–3.84 (7H, m, 2- $\text{H}_A$ , 6- $\text{H}_A$ , 3-H, 8- $\text{H}_2$ , 11- $\text{H}_2$ ), 2.72 (0.6H, app. t,  $J$  11.8, 6- $\text{H}_B$ ), 2.65 (0.4H, app. t,  $J$  11.8, 6- $\text{H}_B$ ), 2.60–2.45 (1H, m, 2- $\text{H}_B$ ), 2.02–1.89 (1H, m, 4- $\text{H}_A$ ), 1.77–1.69 (1H, m, 5- $\text{H}_A$ ), 1.59–1.47 (2H, m, 4- $\text{H}_B$ , 5- $\text{H}_B$ ), 1.45 (5.4H, m,  $\text{C}(\text{Me})_3$ ), 1.40 (3.6H, m,  $\text{C}(\text{Me})_3$ ), 1.28 (1.8H, t,  $J$  7.1, 12- $\text{H}_3$ ), 1.17 (1.2H, t,  $J$  7.1 Hz, 12- $\text{H}_3$ );  $\delta_{\text{C}}$  (125 MHz,  $\text{CDCl}_3$ ) 170.1 (C=O C-9), 156.3 (C=O Cbz), 155.5 (C=O Cbz), 154.9 (C=O Boc), 154.8 (C=O Boc), 136.5 (*ipso*-Ph), 128.7 (Ph), 128.6 (Ph), 128.2 (Ph), 128.0 (Ph), 127.9 (Ph), 79.9 ( $\text{C}(\text{Me})_3$ ), 67.9 ( $\text{CH}_2$  Cbz), 67.5 ( $\text{CH}_2$  Cbz), 61.4 (C-11), 53.3 (C-3), 47.3 (C-6), 45.7 (C-8), 43.4 (C-2), 29.1 (C-4), 28.5 ( $\text{C}(\text{Me})_3$ ), 24.8 (C-5), 14.3 (C-12), 14.2 (C-12) (24 out of 36 signals present); HRMS found  $\text{MNa}^+$ , 443.2157.  $\text{C}_{22}\text{H}_{32}\text{N}_2\text{O}_6\text{Na}$  requires 443.2153. Spectroscopic data are consistent with those reported in the literature.<sup>13</sup>

### Benzyl 2-oxo-1,4-diazabicyclo[3.3.1]nonane-4-carboxylate **6f**

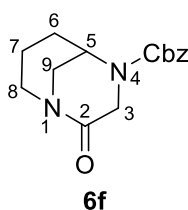

**6f** was synthesised using general method D using NaOH (11.5 mg, 0.288 mmol), amino ester **9f** (110 mg, 0.262 mmol), 1:1 MeOH:water (4.4 mL), HCl (2.9 mL, 6 N), EtOAc (0.4 mL), toluene (3.5 mL) and *n*- $\text{Bu}_2\text{SnO}$  (65.7 mg). The crude product was purified by flash column chromatography, eluting with 1:1 hexane–EtOAc to yield

*bicyclic carbamate 6f* as a 55:45 mixture of rotamers (41.7 mg, 58%) as a colourless oil,  $R_f$  0.35 (EtOAc);  $\nu_{\max}/\text{cm}^{-1}$  2927, 2859, 1686 (C=O), 1407, 1156, 1090, 1008, 765 and 698;  $\delta_{\text{H}}$  (500 MHz,  $\text{CDCl}_3$ ) 7.39–7.29 (5H, m, Ph), 5.22–5.06 (2H, s, Cbz  $\text{CH}_2$ ), 4.50 (0.45H, d,  $J$  15.5, 3- $\text{H}_A$ ), 4.41 (0.55H, d,  $J$  15.3, 3- $\text{H}_A$ ), 4.15–4.04 (2H, m, 8- $\text{H}_A$ , 5-H), 3.55 (1H, app. d,  $J$  14.3, 9- $\text{H}_A$ ), 3.82 (0.55H, d,  $J$  15.3, 3- $\text{H}_B$ ), 3.77 (0.45H, d,  $J$  15.3, 3- $\text{H}_B$ ), 3.21 (1H, app. t,  $J$  15.0, 9- $\text{H}_B$ ), 2.94 (1H, app. qd,  $J$  13.1, 3.2, 8- $\text{H}_B$ ), 2.27–2.19 (0.55H, m, 6- $\text{H}_B$ ), 2.13–2.04 (0.45H, m, 6- $\text{H}_A$ ), 1.89–1.76 (1H, m, 7- $\text{H}_A$ ), 1.72–1.66 (1H, m, 6- $\text{H}_B$ ), 1.45–1.35 (1H, m, 7- $\text{H}_B$ );  $\delta_{\text{C}}$  (125 MHz,  $\text{CDCl}_3$ ) 180.2 (C=O C-2), 155.4 (C=O Cbz), 154.9 (C=O Cbz), 136.4 (*ipso*-Ph), 136.3 (*ipso*-Ph), 128.70 (Ph), 128.69 (Ph), 128.4 (Ph), 128.3 (Ph), 128.2 (Ph), 128.1 (Ph), 67.63 ( $\text{CH}_2$  Cbz), 67.56 ( $\text{CH}_2$  Cbz), 52.1 (C-8), 51.9 (C-8), 51.2 (C-9), 51.1 (C-9), 50.2 (C-5), 49.7 (C-5), 48.8 (C-3), 48.7 (C-3), 28.8 (C-6), 27.7 (C-6), 21.1 (C-7), 21.0 (C-7) (21 out of 26 signals present); HRMS found  $\text{MNa}^+$ , 297.1209.  $\text{C}_{15}\text{H}_{18}\text{N}_2\text{O}_3\text{Na}$  requires 297.1210.

***tert*-Butyl 3-((2-ethoxy-2-oxoethyl)((prop-2-yn-1-yloxy)carbonyl)amino)piperidine-1-carboxylate **9g****

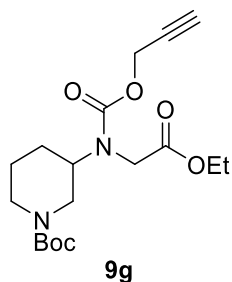

**9g** was synthesised using general method C using propargyl chloroformate (40  $\mu\text{L}$ , 0.322 mmol), amino ester **S8** (83.9 mg, 0.293 mmol) and  $\text{NaHCO}_3$  (145 mg, 1.76 mmol) in DCM (3 mL) for 16 h. The crude product was purified by flash column chromatography, eluting with 1:1 hexane–EtOAc to yield *carbamate 9g* as a 55:45 mixture of rotamers (96.9 mg, 91%) as a colourless oil,  $R_f$  0.30 (1:1 hexane–EtOAc);  $\nu_{\max}/\text{cm}^{-1}$  3250 ( $\text{C}\equiv\text{C-H}$ ), 2978, 2941, 2864, 1750 (C=O), 1684 (C=O), 1409, 1366, 1299, 1264, 1238, 1176, 1147, 1108, 1026, 991 and 769;  $\delta_{\text{H}}$  (500 MHz,  $\text{CDCl}_3$ ) 4.81–

4.65 (2H, m, POC 3-H<sub>2</sub>), 4.21 (0.9H, q, *J* 7.1, 11-H<sub>2</sub>), 4.19 (1.1H, q, *J* 7.1, 11-H<sub>2</sub>), 4.16–3.79 (5H, m, 2-H<sub>A</sub>, 3-H, 6-H<sub>A</sub>, 8-H<sub>2</sub>), 2.72 (0.55H, app. t, *J* 11.9, 6-H<sub>B</sub>), 2.66 (0.45H, app. t, *J* 11.9, 6-H<sub>B</sub>), 2.61–2.49 (1H, m, 2-H<sub>B</sub>), 2.47 (0.45H, t, *J* 2.2, POC 5-H), 2.43 (0.55H, t, *J* 2.1, POC 5-H), 2.01–1.90 (1H, m, 4-H<sub>A</sub>), 1.76–1.67 (1H, m, 5-H<sub>A</sub>), 1.59–1.50 (2H, m, 4-H<sub>B</sub>, 5-H<sub>B</sub>), 1.46 (4.05H, s, C(Me)<sub>3</sub>), 1.45 (4.95H, m, C(Me)<sub>3</sub>), 1.27 (3H, t, *J* 7.3, 12-H<sub>3</sub>);  $\delta_c$  (125 MHz, CDCl<sub>3</sub>) 169.9 (C=O C-9), 155.5, 154.9, 154.8, 154.7 (C=O POC/Boc), 80.0 (C(Me)<sub>3</sub>), 78.2 (POC C-4), 75.0 (POC C-5), 74.7 (POC C-5), 61.51 (C-11), 61.47 (C-11), 53.6 (C-3), 53.4 (POC C-3), 53.3 (POC C-3), 45.8 (br, C-6/C-8), 43.4 (br, C-2), 29.0 (C-4), 28.5 (C(Me)<sub>3</sub>), 28.4 (C-4), 24.8 (C-5), 14.31 (C-12), 14.28 (C-12) (22 out of 32 signals present); HRMS found MH<sup>+</sup>, 369.2019. C<sub>18</sub>H<sub>29</sub>N<sub>2</sub>O<sub>6</sub> requires 369.2020.

**Prop-2-yn-1-yl 2-oxo-1,4-diazabicyclo[3.3.1]nonane-4-carboxylate 6g**

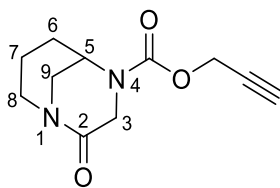

**6g**

**6g** was synthesised using general method D using NaOH (7.0 mg, 0.175 mmol), amino ester **9g** (58.5 mg, 0.159 mmol), 1:1 MeOH:water (2.4 mL), HCl (1.5 mL, 6 N), EtOAc (0.2 mL), toluene (2 mL) and *n*-Bu<sub>2</sub>SnO (39.5 mg). The crude product was purified by flash column chromatography, eluting with 1:1 hexane–EtOAc to yield *bicyclic carbamate 6g* as a 55:45 mixture of rotamers (18.7 mg, 53%) as a colourless oil, *R<sub>f</sub>* 0.49 (EtOAc);  $\nu_{\max}/\text{cm}^{-1}$  3247, 2953, 2867, 1691 (C=O), 1409, 1382, 1159, 1093, 1009 and 764;  $\delta_H$  (500 MHz, CDCl<sub>3</sub>) 4.78–4.72 (1.45H, m, POC 3-H<sub>2</sub>), 4.68 (0.55, dd, *J* 15.6, 2.4, POC 3-H<sub>2</sub>), 4.48 (0.45H, d, *J* 15.5, 3-H<sub>A</sub>), 4.39 (0.55H, d, *J* 15.3, 3-H<sub>A</sub>), 4.14–4.04 (2H, m, 8-H<sub>A</sub>, 5-H), 3.84 (0.55H, d, *J* 15.3, 3-H<sub>B</sub>), 3.77 (0.45H, d, *J* 15.3, 3-H<sub>B</sub>), 3.56 (1H, app. d, *J* 14.3, 9-H<sub>A</sub>), 3.23 (1H, dd, *J* 14.3, 4.4, 9-H<sub>B</sub>), 3.00–2.89

(1H, m, 8-H<sub>B</sub>), 2.48 (0.55H, t, *J* 2.4, POC 5-H), 2.46 (0.45H, t, *J* 2.4, POC 5-H), 2.22 (0.55H, app. d, *J* 14.0, 6-H<sub>A</sub>), 2.13 (0.45H, app. d, *J* 14.0, 6-H<sub>B</sub>), 1.88–1.76 (1H, m, 7-H<sub>A</sub>), 1.75–1.66 (1H, m, 6-H<sub>B</sub>), 1.41 (1H, app. d, *J* 14.1, 7-H<sub>B</sub>);  $\delta_{\text{C}}$  (125 MHz, CDCl<sub>3</sub>) 179.9 (C=O C-2), 154.6 (C=O POC), 154.0 (C=O POC), 78.2 (POC C-4), 78.2 (POC C-4), 75.0 (POC C-5), 74.9 (POC C-5), 53.31 (POC C-3), 53.27 (POC C-3), 52.0 (C-8), 51.9 (C-8), 51.2 (C-9), 51.1 (C-9), 50.4 (C-5), 49.7 (C-5), 48.74 (C-3), 48.72 (C-3), 28.7 (C-6), 27.5 (C-6), 21.1 (C-7), 21.0 (C-7) (21 out of 22 signals present); HRMS found MNa<sup>+</sup>, 245.0897. C<sub>11</sub>H<sub>14</sub>N<sub>2</sub>O<sub>3</sub>Na requires 245.0897.

**tert-Butyl 3-(((S)-1-methoxy-1-oxo-3-phenylpropan-2-yl)amino)piperidine-1-carboxylate (*S*)-S9**

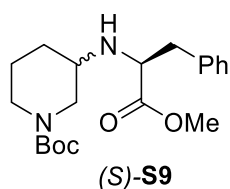

(*S*)-S9 was synthesised using general method B using enecarbamate **5c** (45.8 mg, 0.25 mmol) and L-phenylalanine methyl ester hydrochloride (70.0 mg, 0.50 mmol). Reaction was performed in duplicate and the contents of the two vials combined before work-up. The crude product was purified by flash column chromatography eluting with 2:1 hexane–EtOAc to yield *amino ester* (*S*)-S9 as an unresolved mixture of rotamers and diastereomers (139 mg, 51%) as a yellow oil, *R*<sub>f</sub> 0.64 (EtOAc);  $\nu_{\text{max}}/\text{cm}^{-1}$  2975, 2931, 2857, 1736 (C=O), 1688 (C=O), 1422, 1365, 1261, 1239, 1172, 1151, 766 and 700;  $\delta_{\text{H}}$  (500 MHz, CDCl<sub>3</sub>) 7.30–7.26 (2H, m, Ph), 7.24–7.20 (1H, m, Ph), 7.18–7.14 (2H, m, Ph), 3.94–3.68 (2H, m, 2-H<sub>A</sub>, 6-H<sub>A</sub>), 3.69–3.58 (4H, m, OMe, 8-H), 2.97–2.86 (2H, m, 9-H<sub>2</sub>), 2.80 (1H, ddd, *J* 13.5, 12.1, 6.7, 6-H<sub>B</sub>), 2.66 (0.5H, dd, *J* 12.6, 9.1, 2-H<sub>B</sub>), 2.57–2.46 (1H, m, 3-H, 2-H<sub>B</sub>), 2.45–2.36 (0.5H, m, 3-H), 1.85–1.74 (1H, m, 4-H<sub>A</sub>), 1.68–1.60 (1H, m, 5-H<sub>A</sub>), 1.56 (1H, br s, NH), 1.44 (9H, m, C(Me)<sub>3</sub>), 1.42–1.30 (1H, m, 5-H<sub>B</sub>), 1.30–1.21 (0.5H, m, 4-H<sub>B</sub>), 1.16 (0.5H, ddd, *J* 13.1, 12.1, 3.8, 4-H<sub>B</sub>);  $\delta_{\text{C}}$  (125 MHz, CDCl<sub>3</sub>) 172.6 (C=O CO<sub>2</sub>Me), 175.3 (C=O CO<sub>2</sub>Me), 155.0 (C=O



Boc), 137.4 (*ipso*-Ph), 137.3 (*ipso*-Ph), 130.4 (Ph), 129.3 (Ph), 128.6 (Ph), 128.5 (Ph), 126.8 (Ph), 79.6 (C(Me)<sub>3</sub>), 79.1 (C(Me)<sub>3</sub>), 60.4 (C-8), 52.7 (C-3), 51.9 (OMe), 51.8 (OMe), 49.4 (C-2), 48.6 (C-2), 44.6 (C-6), 43.8 (C-6), 40.3 (C-9), 40.1 (C-9), 32.1 (C-4), 30.7 (C-4), 28.58 (C(Me)<sub>3</sub>), 28.57 (C(Me)<sub>3</sub>), 23.8 (C-5), 23.4 (C-5) (28 out of 32 signals present); HRMS found MNa<sup>+</sup>, 385.2103. C<sub>20</sub>H<sub>30</sub>N<sub>2</sub>O<sub>4</sub>Na requires 385.2098.

**tert-Butyl 3-(((benzyloxy)carbonyl)((S)-1-methoxy-1-oxo-3-phenylpropan-2-yl)amino)piperidine-1-carboxylate (S)-9h**

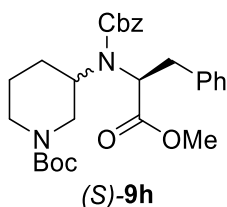

(S)-9h was synthesised using general method C using benzyl chloroformate (52  $\mu$ L, 0.364 mmol), amino ester (S)-S9 (120 mg, 0.331 mmol) and NaHCO<sub>3</sub> (167 mg, 1.99 mmol) in DCM (5 mL) for 96 h. The crude product was purified by flash column chromatography, eluting with 75:25 hexane–EtOAc to yield *impure carbamate* (S)-9h as an unknown mixture of diastereomers and rotamers (53.3 mg, ~32%) as a colourless oil,  $R_f$  0.67 (1:1 hexane-EtOAc);  $\nu_{\max}/\text{cm}^{-1}$  2950, 2859, 1743 (C=O), 1688 (C=O), 1420, 1268, 1238, 1174, 1149, 754 and 700;  $\delta_H$  (500 MHz, CDCl<sub>3</sub>) 7.41–7.32 (6H, m, Ph), 7.25–7.17 (2H, m, Ph), 7.13–7.06 (2H, m, Ph), 5.34–5.03 (2H, m, Cbz CH<sub>2</sub>), 4.31–3.83 (3H, m, 2-H<sub>A</sub>, 6-H<sub>A</sub>, 8-H), 3.80–3.48 (4H, m, OMe, 3-H), 3.45–3.37 (1H, m, CH<sub>2</sub>Ph), 3.34–3.04 (1H, m, CH<sub>2</sub>Ph), 2.82–2.54 (1H, m, 2-H<sub>B</sub>), 2.47–2.24 (1H, m, 6-H<sub>B</sub>), 1.66–1.52 (1H, m, 5-H<sub>A</sub>), 1.59–1.34 (9H, m, C(Me)<sub>3</sub>), 1.35–1.22 (1H, m, 5-H<sub>B</sub>), 1.21–0.78 (2H, m, 4-H<sub>2</sub>);  $\delta_C$  (125 MHz, CDCl<sub>3</sub>) 171.6 (C=O CO<sub>2</sub>Me), 171.4 (C=O CO<sub>2</sub>Me), 155.6, 155.3, 154.8, 154.6 (C=O Cbz/Boc), 138.4 (*ipso*-Ph), 138.1 (*ipso*-Ph), 136.6 (*ipso*-Ph), 136.2 (*ipso*-Ph), 129.8 (Ph), 129.6 (Ph), 128.7 (Ph), 128.4 (Ph), 128.2 (Ph), 128.0 (Ph), 127.7 (Ph), 127.1 (Ph), 79.7 (C(Me)<sub>3</sub>), 79.6 (C(Me)<sub>3</sub>), 67.6 (Cbz CH<sub>2</sub>), 67.4 (Cbz CH<sub>2</sub>), 59.4 (C-8), 54.1 (C-3), 53.7 (C-3), 52.5 (OMe), 52.4 (OMe), 47.3 (C-2),

43.5 (C-6), 37.2 (CH<sub>2</sub>Ph), 35.9 (CH<sub>2</sub>Ph), 28.9 (C-4), 28.53 (C(Me)<sub>3</sub>), 28.50 (C(Me)<sub>3</sub>), 25.0 (C-5) (35 out of 44 signals present); HRMS found MH<sup>+</sup>, 497.2656. C<sub>28</sub>H<sub>37</sub>N<sub>2</sub>O<sub>6</sub> requires MH, 497.2646.

**Benzyl (3*S*,5*S*)-3-benzyl-2-oxo-1,4-diazabicyclo[3.3.1]nonane-4-carboxylate (3*S*,5*S*)-6h**

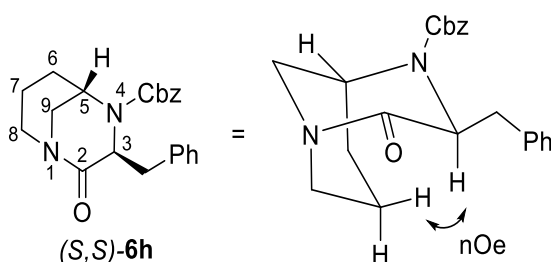

(*S,S*)-**6h** was synthesised using general method D using NaOH (4.4 mg, 0.111 mmol), amino ester (*S,S*)-**9h** (50.0 mg, 0.101 mmol), 1:1 MeOH:water (2 mL), HCl (1.1 mL, 6 N), EtOAc (0.2 mL), toluene (1.3 mL) and *n*-Bu<sub>2</sub>SnO (25.3 mg). The crude product was purified by flash column chromatography, eluting with 1:1 hexane–EtOAc to yield *bicyclic carbamate* (*S,S*)-**6h** as a single diastereomer and as a 60:40 mixture of rotamers (4.4 mg, 12%) as a colourless oil, *R*<sub>f</sub> 0.62 (EtOAc);  $\nu_{\max}/\text{cm}^{-1}$  2956, 2869, 1684 (C=O), 1404, 1266, 1160, 1108 and 699;  $\delta_{\text{H}}$  (500 MHz, CDCl<sub>3</sub>) 7.40–7.31 (5H, m, Ph), 7.31–7.26 (1H, m, Ph), 7.25–7.16 (3H, m, Ph), 7.06–7.02 (1H, m, Ph), 5.19 (0.4H, d, *J* 12.4, Cbz CH<sub>2</sub>), 5.16 (0.4H, d, *J* 12.4, Cbz CH<sub>2</sub>), 5.08 (0.6H, d, *J* 12.0, Cbz CH<sub>2</sub>), 4.99 (0.6H, d, *J* 12.0, Cbz CH<sub>2</sub>), 4.90 (0.4H, dd, *J* 9.8, 5.3, 5-H), 4.77 (0.6H, dd, *J* 9.2, 5.9, 5-H), 4.20 (0.6H, app. br s, 2-H), 4.10 (0.4H, app. br s, 2-H), 4.08–4.01 (1H, m, 8-H<sub>A</sub>), 3.71 (0.6H, app. d, *J* 14.5, 9-H<sub>A</sub>), 3.55 (0.4H, app. d, *J* 14.5, 9-H<sub>A</sub>), 3.28 (0.4H, dd, *J* 13.4, 5.3, CH<sub>2</sub>Ph), 3.22 (0.6H, dd, *J* 14.5, 1.5, 9-H<sub>B</sub>), 3.14–3.19 (1H, m, 9-H<sub>B</sub>, CH<sub>2</sub>Ph), 3.09–3.02 (1H, m, CH<sub>2</sub>Ph), 3.02–2.89 (1H, m, 8-H<sub>B</sub>), 2.20 (0.6H, app. d, *J* 13.3, 7-H<sub>A</sub>), 2.03 (0.4H, app. d, *J* 13.3, 6-H<sub>A</sub>), 1.86–1.65 (2H, m, 6-H<sub>B</sub>, 7-H<sub>A</sub>), 1.47–1.35 (1H, m, 7-H<sub>B</sub>);  $\delta_{\text{C}}$  (125 MHz, CDCl<sub>3</sub>) 181.4 (C=O C-2), 179.9 (C=O C-2), 136.8 (*ipso*-Ph), 136.7 (*ipso*-Ph), 129.4 (Ph), 129.2 (Ph), 128.8 (Ph), 128.48 (Ph), 128.45 (Ph), 128.3 (Ph),

128.1 (Ph), 127.1 (Ph), 67.7 (CH<sub>2</sub> Cbz), 67.5 (CH<sub>2</sub> Cbz), 62.8 (C-3), 53.6 (C-8), 53.5 (C-8), 49.8 (C-9), 49.7 (C-5), 49.1 (C-5), 40.4 (CH<sub>2</sub>Ph), 39.4 (CH<sub>2</sub>Ph), 29.0 (C-6), 27.8 (C-6), 21.52 (C-7), 21.45 (C-7) (26 out of 36 signals present); HRMS found MH<sup>+</sup>, 365.1871. C<sub>22</sub>H<sub>25</sub>N<sub>2</sub>O<sub>3</sub> requires 365.1860. Stereochemistry of (*S,S*)-**6h** assigned by a positive nOe observed between 3-H and 7-H<sub>A</sub>.

***tert*-Butyl 3-((2-ethoxy-2-oxoethyl)amino)-3-methylpiperidine-1-carboxylate **S10****

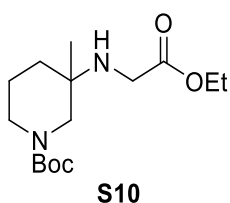

**S10** was synthesised using general method B using enecarbamate **5d** (45.8 mg, 0.25 mmol) and glycine ethyl ester hydrochloride (70.0 mg, 0.50 mmol). Reaction was performed in duplicate and the contents of the two vials combined before work-up. The crude product was purified by flash column chromatography eluting with 1:1 hexane–EtOAc to yield *amino ester* **S10** as an undetermined mixture of rotamers (69.3 mg, 46%) as a yellow oil, *R<sub>f</sub>* 0.33 (EtOAc);  $\nu_{\max}/\text{cm}^{-1}$  2974, 2933, 2862, 1740 (C=O), 1692 (C=O), 1424, 1366, 1276, 1165 and 765;  $\delta_{\text{H}}$  (500 MHz, CDCl<sub>3</sub>) 4.18 (2H, q, *J* 6.9 Hz, 11-H<sub>2</sub>), 3.59–3.50 (1H, m, 6-H<sub>A</sub>), 3.48–3.32 (3H, m, 2-H<sub>A</sub>, 8-H<sub>2</sub>), 3.18–3.09 (1H, m, 6-H<sub>B</sub>), 3.00 (1H, d, *J* 13.0, 2-H<sub>B</sub>), 1.68–1.58 (3H, m, NH, 4-H<sub>B</sub>, 5-H<sub>B</sub>), 1.54–1.46 (2H, m, 4-H<sub>B</sub>, 5-H<sub>B</sub>), 1.45 (9H, s, C(Me)<sub>3</sub>), 1.27 (3H, t, *J* 7.1, 12-H<sub>3</sub>), 1.03 (3H, s, 13-Me);  $\delta_{\text{C}}$  (125 MHz, CDCl<sub>3</sub>) 172.6 (C=O C-9), 155.1 (C=O Boc), 79.7 (C(Me)<sub>3</sub>), 61.0 (C-11), 51.2 (C-2), 44.2 (C-8), 43.6 (C-6), 36.3 (C-4), 28.6 (C(Me)<sub>3</sub>), 23.0 (Me-13), 21.6 (C-5), 14.4 (C-12) (12 out of 13 signals present); HRMS found MH<sup>+</sup>, 301.2206. C<sub>15</sub>H<sub>29</sub>N<sub>2</sub>O<sub>4</sub> requires 301.2207.

**tert-Butyl 3-(((benzyloxy)carbonyl)(2-ethoxy-2-oxoethyl)amino)-3-methylpiperidine-1-carboxylate 9i**

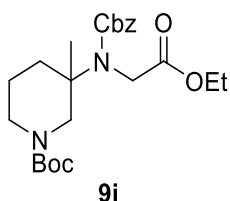

**9i** was synthesised using general method C using benzyl chloroformate (34  $\mu\text{L}$ , 0.239 mmol), amino ester **S10** (65.0 mg, 0.217 mmol) and  $\text{NaHCO}_3$  (109 mg, 1.30 mmol) in DCM (2 mL) for 16 h. The crude product was purified by flash column chromatography, eluting with 80:20 hexane–EtOAc to yield *carbamate 9i* as an undetermined mixture of rotamers (73.7 mg, 78%) as a colourless oil,  $R_f$  0.54 (1:1 hexane–EtOAc);  $\nu_{\text{max}}/\text{cm}^{-1}$  2977, 2934, 2868, 1750 (C=O), 1699 (C=O), 1425, 1227, 1189, 1156, 1114, 775 and 698;  $\delta_{\text{H}}$  (500 MHz,  $\text{CDCl}_3$ ) 7.38–7.26 (5H, m, Ph), 5.12 (2H, br s, Cbz  $\text{CH}_2$ ), 4.25–3.99 (4H, br m, 11- $\text{H}_2$ , 8- $\text{H}_2$ ), 3.97–3.75 (1H, br m, 2- $\text{H}_A$ ), 3.66–3.44 (1H, br m, 6- $\text{H}_A$ ), 3.42–3.01 (2H, br m, 2- $\text{H}_B$ , 6- $\text{H}_B$ ), 2.95–2.37 (1H, br m, 4- $\text{H}_A$ ), 1.73–1.50 (3H, br m, 4- $\text{H}_B$ , 5- $\text{H}_2$ ), 1.44 (9H, s,  $\text{C}(\text{Me})_3$ ), 1.42 (3H, br s, 13-Me), 1.23–1.13 (3H, br m, 12- $\text{H}_3$ );  $\delta_{\text{C}}$  (125 MHz,  $\text{CDCl}_3$ ) 171.2 (C=O C-9), 154.7 (C=O Boc/Cbz), 136.6 (*ipso*-Ph), 128.7 (Ph), 128.6 (Ph), 128.1 (Ph), 127.9 (Ph), 127.8 (Ph), 127.1 (Ph), 80.1 ( $\text{C}(\text{Me})_3$ ), 67.2 (Cbz  $\text{CH}_2$ ), 61.1 (C-11), 57.7 (C-3), 52.8 (C-2), 46.7 (C-8), 43.4 (C-6), 34.6 (C-4), 28.5 ( $\text{C}(\text{Me})_3$ ), 22.8 (C-5), 21.8 (Me-13), 14.2 (C-12); HRMS found  $\text{MH}^+$ , 435.2490.  $\text{C}_{23}\text{H}_{35}\text{N}_2\text{O}_6$  requires 435.2490.

## Benzyl 5-methyl-2-oxo-1,4-diazabicyclo[3.3.1]nonane-4-carboxylate **6i**

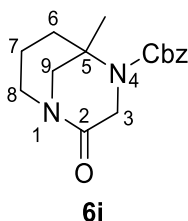

**6i** was synthesised using general method D using NaOH (7.1 mg, 0.177 mmol), amino ester **9i** (70.0 mg, 0.161 mmol), 1:1 MeOH:water (2.8 mL), HCl (1.8 mL, 6 N), EtOAc (0.2 mL), toluene (2.1 mL) and *n*-Bu<sub>2</sub>SnO (40.4 mg). The crude product was purified by flash column chromatography, eluting with 1:1 hexane–EtOAc to yield *bicyclic carbamate 6i* as a 65:35 mixture of rotamers (35.9 mg, 77%) as a colourless oil, *R*<sub>f</sub> 0.47 (EtOAc);  $\nu_{\text{max}}/\text{cm}^{-1}$  2935, 1684 (C=O), 1401, 1378, 1349, 1313, 1200, 1117, 766 and 698;  $\delta_{\text{H}}$  (500 MHz, CDCl<sub>3</sub>) 7.39–7.28 (5H, m, Ph), 5.20–5.17 (0.7H, m, Cbz CH<sub>2</sub>), 5.15 (0.65H, d, *J* 12.4, Cbz, CH<sub>2</sub>), 5.05 (0.65H, d, *J* 12.4, Cbz, CH<sub>2</sub>), 4.67 (0.35H, d, *J* 15.2, 3-H<sub>A</sub>), 4.52 (0.65H, d, *J* 15.2, 3-H<sub>A</sub>), 4.09–4.01 (1H, m, 8-H<sub>A</sub>), 3.80 (0.65H, d, *J* 15.2, 3-H<sub>B</sub>), 3.75 (0.35H, d, *J* 15.2, 3-H<sub>B</sub>), 3.49–3.42 (1H, m, 9-H<sub>A</sub>), 2.95–2.75 (2.65H, m, 8-H<sub>B</sub>, 9-H<sub>B</sub>, 6-H<sub>A</sub>), 2.51–2.44 (0.35H, m, 6-H<sub>A</sub>), 1.73–1.64 (1H, m, 7-H<sub>A</sub>), 1.43 (1.95H, s, Me), 1.40–1.31 (3.05H, m, 6-H<sub>B</sub>, 7-H<sub>B</sub>, Me);  $\delta_{\text{C}}$  (125 MHz, CDCl<sub>3</sub>) 179.7 (C=O C-2), 156.1 (C=O Cbz), 153.8 (C=O Cbz), 136.4 (*ipso*-Ph), 136.2 (*ipso*-Ph), 128.72 (Ph), 128.67 (Ph), 128.37 (Ph), 128.35 (Ph), 128.2 (Ph), 128.0 (Ph), 67.9 (CH<sub>2</sub> Cbz), 67.1 (CH<sub>2</sub> Cbz), 58.7 (C-8), 58.3 (C-8), 56.2 (C-5), 55.6 (C-5), 50.8 (C-9), 50.6 (C-9), 48.9 (C-3), 48.7 (C-3), 34.2 (C-6), 32.5 (C-6), 24.2 (C-7), 22.9 (C-7), 21.8 (Me), 21.7 (Me) (27 out of 28 signals present); HRMS found MH<sup>+</sup>, 289.1548. C<sub>16</sub>H<sub>21</sub>N<sub>2</sub>O<sub>3</sub> requires 289.1547.

**tert-Butyl 3-((2-ethoxy-2-oxoethyl)amino)azepane-1-carboxylate **S11****

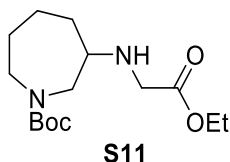

**S11** was synthesised using general method B using enecarbamate **5e** (49.3 mg, 0.25 mmol) and glycine ethyl ester hydrochloride (70.0 mg, 0.50 mmol). Reaction was performed in duplicate and the contents of the two vials combined before work-up. The crude product was purified by flash column chromatography eluting with 1:1 hexane–EtOAc to yield amino ester **S11** as a 60:40 mixture of rotamers (68.2 mg, 42%) as a yellow oil,  $R_f$  0.25 (EtOAc);  $\nu_{\max}/\text{cm}^{-1}$  2975, 2929, 2864, 1738 (C=O), 1687 (C=O), 1365, 1298, 1162, 842 and 771;  $\delta_{\text{H}}$  (500 MHz,  $\text{CDCl}_3$ ) 4.20 (1.2H, q,  $J$  7.1 Hz, 12- $\text{H}_2$ ), 4.17 (0.8H, q,  $J$  7.1 Hz, 12- $\text{H}_2$ ), 3.76 (0.4H, dd,  $J$  14.0, 3.9, 2- $\text{H}_A$ ), 3.70–3.62 (1.2H, m, 2- $\text{H}_A$ , 7- $\text{H}_A$ ), 3.55–3.49 (0.4H, m, 7- $\text{H}_B$ ), 3.48 (0.8H, m, 9- $\text{H}_2$ ), 3.45 (1.2H, m, 9- $\text{H}_2$ ), 3.22–3.09 (1H, m, 7- $\text{H}_A$ , 7- $\text{H}_B$ ), 2.89 (0.4H, dd,  $J$  14.0, 8.5, 2- $\text{H}_B$ ), 2.84–2.72 (1H, m, 2- $\text{H}_B$ , 3-H), 2.66–2.58 (0.6H, m, 3-H), 1.90–1.79 (1.6H, m, 4- $\text{H}_A$ , 6- $\text{H}_A$ ), 1.79–1.42 (1.4H, m, 5- $\text{H}_A$ , 6- $\text{H}_A$ ) 1.64 (1H, br s, NH), 1.61–1.55 (1H, m, 6- $\text{H}_B$ ), 1.47 (5.4H, s,  $\text{C}(\text{Me})_3$ ), 1.45 (3.6H, s,  $\text{C}(\text{Me})_3$ ), 1.41–1.31 (2H, m, 4- $\text{H}_B$ , 5- $\text{H}_B$ ), 1.27 (1.8H, t,  $J$  7.0, 13- $\text{H}_3$ ), 1.26 (1.2H, t,  $J$  7.0, 13- $\text{H}_3$ );  $\delta_{\text{C}}$  (125 MHz,  $\text{CDCl}_3$ ) 172.8 (C=O C-10), 156.0 (C=O Boc), 155.7 (C=O Boc), 79.6 ( $\text{C}(\text{Me})_3$ ), 79.4 ( $\text{C}(\text{Me})_3$ ), 61.0 (C-12), 60.9 (C-12), 58.5 (C-3), 58.0 (C-3), 50.7 (C-2), 50.2 (C-2), 49.2 (C-9), 48.9 (C-9), 47.9 (C-7), 46.8 (C-7), 35.3 (C-4), 34.3 (C-4), 28.6 ( $\text{C}(\text{Me})_3$ ), 27.9 (C-6), 27.5 (C-6), 22.8 (C-5), 22.7 (C-5), 14.4 (C-13), 14.3 (C-13) (24 out of 26 signals present); HRMS found  $\text{MH}^+$ , 301.2133.  $\text{C}_{15}\text{H}_{29}\text{N}_2\text{O}_4$  requires 301.2122. Spectroscopic data are consistent with those reported in the literature.<sup>12</sup>

**tert-Butyl 3-(((benzyloxy)carbonyl)(2-ethoxy-2-oxoethyl)amino)azepane-1-carboxylate 9j**

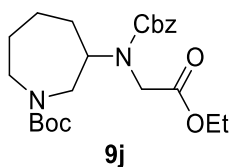

**9j** was synthesised using general method C using benzyl chloroformate (34  $\mu\text{L}$ , 0.239 mmol), amino ester **S11** (65.0 mg, 0.217 mmol) and  $\text{NaHCO}_3$  (109 mg, 1.30 mmol) in DCM (2 mL) for 16 h. The crude product was purified by flash column chromatography, eluting with 75:25 hexane–EtOAc to yield *carbamate 9j* as a 65:35 mixture of rotamers (65.5 mg, 70%) as a colourless oil,  $R_f$  0.64 (1:1 hexane-EtOAc);  $\nu_{\text{max}}/\text{cm}^{-1}$  2975, 2930, 1691 (C=O), 1394, 1365, 1156, 981 and 768;  $\delta_{\text{H}}$  (500 MHz,  $\text{CDCl}_3$ ) 7.42–7.27 (5H, m, Ph), 5.23–5.14 (0.7H, m, Cbz  $\text{CH}_2$ ), 5.14–5.04 (1.3H, m, Cbz  $\text{CH}_2$ ), 4.19 (0.7H, q,  $J$  7.1 Hz, 12- $\text{H}_2$ ), 4.15–4.02 (1.95H, m, 3-H, 12- $\text{H}_2$ ), 4.01–3.86 (2.35H, m, 3-H, 9- $\text{H}_2$ ), 3.81–3.68 (0.65H, m, 2- $\text{H}_A$ ), 3.66–3.43 (1.35H, m, 2- $\text{H}_A$ , 7- $\text{H}_A$ ), 3.38–3.02 (2H, m, 2- $\text{H}_B$ , 7- $\text{H}_B$ ), 2.01–1.72 (3H, m, 4- $\text{H}_A$ , 5- $\text{H}_A$ , 6- $\text{H}_A$ ), 1.70–1.51 (3H, m, 4- $\text{H}_B$ , 5- $\text{H}_B$ , 6- $\text{H}_B$ ), 1.50–1.42 (7.5H, m,  $\text{C}(\text{Me})_3$ ), 1.38 (1.5H, s,  $\text{C}(\text{Me})_3$ ), 1.27 (1.05H, t,  $J$  6.8, 13- $\text{H}_3$ ), 1.17 (1.95H, t,  $J$  6.8, 13- $\text{H}_3$ );  $\delta_{\text{C}}$  (125 MHz,  $\text{CDCl}_3$ ) 170.2 (C=O C-10), 170.3 (C=O C-10), 156.1 (C=O Boc), 155.5 (C=O Cbz), 136.6 (*ipso*-Ph), 128.7 (Ph), 128.6 (Ph), 128.5 (Ph), 128.1 (Ph), 127.91 (Ph), 127.87 (Ph), 79.9 ( $\text{C}(\text{Me})_3$ ), 79.6 ( $\text{C}(\text{Me})_3$ ), 67.4 (Cbz  $\text{CH}_2$ ), 61.3 (C-12), 61.2 (C-12), 58.5 (C-3), 58.0 (C-3), 49.5 (C-2), 49.0 (C-2), 47.6 (C-7), 47.2 (C-7), 46.9 (C-9), 46.5 (C-9), 31.8 (C-4), 31.0 (C-4), 28.6 ( $\text{C}(\text{Me})_3$ ), 28.5 ( $\text{C}(\text{Me})_3$ ), 28.1 (C-6), 27.5 (C-6), 23.8 (C-5), 23.6 (C-5), 14.3 (C-13), 14.2 (C-13) (34 out of 38 signals present); HRMS found  $\text{MH}^+$ , 435.2494.  $\text{C}_{23}\text{H}_{35}\text{N}_2\text{O}_6$  requires 435.2490.

### Benzyl 9-oxo-1,7-diazabicyclo[4.3.1]decane-7-carboxylate **6j**

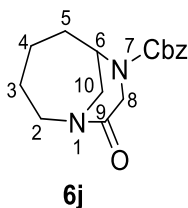

**6j** was synthesised using general method D using NaOH (6.06 mg, 0.152 mmol), amino ester **9j** (60 mg, 0.138 mmol), 1:1 MeOH:water (2.4 mL), HCl (1.5 mL, 6 N), EtOAc (0.2 mL), toluene (1.8 mL) and *n*-Bu<sub>2</sub>SnO (34.6 mg). The crude product was purified by flash column chromatography, eluting with EtOAc to yield *bicyclic carbamate* **6j** as a 60:40 mixture of rotamers (28.9 mg, 73%) as a colourless oil, *R*<sub>f</sub> 0.30 (EtOAc);  $\nu_{\max}/\text{cm}^{-1}$  2928, 2860, 1667 (C=O), 1403, 1331, 1191, 1126, 1072, 765 and 699;  $\delta_{\text{H}}$  (500 MHz, CDCl<sub>3</sub>) 7.39–7.29 (5H, m, Ph), 5.21–5.07 (2H, m, Cbz CH<sub>2</sub>), 4.46 (0.4H, d, *J* 15.6, 8-H<sub>A</sub>), 4.41 (0.6H, d, *J* 15.4, 8-H<sub>A</sub>), 4.35–4.24 (1H, m, 2-H<sub>A</sub>), 4.20 (0.6H, m, 6-H), 4.13 (0.4H, m, 6-H), 3.82 (0.6H, d, *J* 15.4, 8-H<sub>B</sub>), 3.77 (0.4H, d, *J* 15.6, 8-H<sub>B</sub>), 2.93–2.84 (1H, m, 2-H<sub>B</sub>), 3.64 (1H, dd, *J* 14.6, 2.2, 10-H<sub>A</sub>), 3.26 (0.6H, dd, *J* 14.6, 1.0, 10-H<sub>B</sub>), 3.21 (0.4H, app. d, *J* 14.6, 10-H<sub>B</sub>), 2.25 (0.6H, app. dd, *J* 15.1, 2.8, 5-H<sub>A</sub>), 2.14 (0.4H, app. dd, *J* 14.8, 3.3, 5-H<sub>A</sub>), 2.05–1.93 (1H, m, 3-H<sub>A</sub>), 1.65–1.52 (2H, m, 3-H<sub>B</sub>, 4-H<sub>A</sub>), 1.50–1.41 (1H, m, 5-H<sub>B</sub>), 1.29–1.14 (1H, m, 4-H<sub>B</sub>);  $\delta_{\text{C}}$  (125 MHz, CDCl<sub>3</sub>) 170.9 (C=O C-9), 155.2 (C=O Cbz), 155.0 (C=O Cbz), 136.5 (*ipso*-Ph), 136.3 (*ipso*-Ph), 128.7 (Ph), 128.3 (Ph), 128.2 (Ph), 128.1 (Ph), 67.6 (CH<sub>2</sub> Cbz), 67.5 (CH<sub>2</sub> Cbz), 51.8 (C-6), 51.3 (C-6), 47.9 (C-8), 47.8 (C-8), 47.7 (C-10), 47.5 (C-10), 44.01 (C-2), 43.97 (C-2), 35.8 (C-5), 34.8 (C-5), 27.3 (C-3), 27.1 (C-3), 20.5 (C-4) (24 out of 28 signals present); HRMS found MH<sup>+</sup>, 289.1544. C<sub>16</sub>H<sub>21</sub>N<sub>2</sub>O<sub>3</sub> requires 289.1547.



***tert*-Butyl 3-((3-ethoxy-3-oxopropyl)amino)piperidine-1-carboxylate **S12****

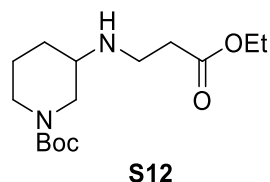

**S12** was synthesised using general method B using enecarbamate **5c** (45.8 mg, 0.25 mmol) and ethyl 3-aminopropionate hydrochloride (75.0 mg, 0.50 mmol). The crude product was purified by flash column chromatography eluting with EtOAc to yield *amino ester* **S12** as a 1:1 mixture of rotamers (59.8 mg, 80%) as a yellow oil,  $R_f$  0.11 (EtOAc);  $\nu_{\max}/\text{cm}^{-1}$  2976, 2932, 2856, 1731 (C=O), 1687 (C=O), 1466, 1392, 1238, 1150 and 767;  $\delta_{\text{H}}$  (500 MHz,  $\text{CDCl}_3$ ) 4.11 (2H, q,  $J$  7.1 Hz, 12- $\text{H}_2$ ), 4.07–3.80 (1H, m, 2- $\text{H}_A$ ), 3.79–3.75 (0.5H, m, 6- $\text{H}_A$ ), 3.75–3.72 (0.5H, m, 6- $\text{H}_A$ ), 2.96–2.77 (3H, m, 6- $\text{H}_B$ , 8- $\text{H}_2$ ), 2.76–2.49 (2H, m, 2- $\text{H}_B$ , 3- $\text{H}$ ), 2.45 (2H, app. dd,  $J$  14.6, 8.2, 9- $\text{H}_2$ ), 1.92–1.83 (1H, m, 4- $\text{H}_A$ ), 1.69–1.60 (1H, m, 5- $\text{H}_A$ ), 1.49–1.35 (11H, m, NH, 5- $\text{H}_B$ ,  $\text{C}(\text{Me})_3$ ), 1.29–1.16 (4H, m, 4- $\text{H}_B$ , 13- $\text{H}_3$ );  $\delta_{\text{C}}$  (125 MHz,  $\text{CDCl}_3$ ) 172.8 (C=O C-10), 155.0 (C=O Boc), 79.5 ( $\text{C}(\text{Me})_3$ ), 60.5 (C-11), 53.7 (C-3), 49.5 (C-2), 49.1 (C-2), 44.7 (C-6), 43.9 (C-6), 42.4 (C-8), 35.2 (C-9), 31.6 (C-4), 28.5 ( $\text{C}(\text{Me})_3$ ), 23.9 (C-5), 23.5 (C-5), 14.3 (C-13) (16 out of 26 signals present); HRMS found  $\text{MH}^+$ , 301.2131.  $\text{C}_{15}\text{H}_{29}\text{N}_2\text{O}_4$  requires 301.2122. Spectroscopic data are consistent with those reported in the literature.<sup>6</sup>

***tert*-Butyl 3-(((benzyloxy)carbonyl)(3-ethoxy-3-oxopropyl)amino)piperidine-1-carboxylate **9k****

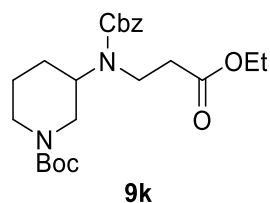

**9k** was synthesised using general method C using benzyl chloroformate (22.0  $\mu\text{L}$ , 0.169 mmol), amino ester **512** (46.2 mg, 0.154 mmol) and  $\text{NaHCO}_3$  (77.0 mg, 0.924 mmol) in DCM (2 mL) for 72 h. The crude product was purified by flash column chromatography, eluting with 1:1 hexane–EtOAc to yield *carbamate 9k* as a 55:45 mixture of rotamers (66.9 mg, 100%) as a colourless oil,  $R_f$  0.42 (1:1 hexane–EtOAc);  $\nu_{\text{max}}/\text{cm}^{-1}$  2976, 2937, 2867, 1732, 1688 (C=O), 1416, 1264, 1239, 1149, 1112, 770 and 698;  $\delta_{\text{H}}$  (500 MHz,  $\text{CDCl}_3$ ) 7.38–7.27 (5H, m, Ph), 5.12 (2H, s, Cbz  $\text{CH}_2$ ), 4.17–3.93 (4H, m, 2- $\text{H}_A$ , 6- $\text{H}_A$ , 12- $\text{H}_2$ ), 3.72 (1H, app. t,  $J$  10.8, 3-H), 3.59–3.40 (2H, m, 8- $\text{H}_2$ ), 2.92–2.81 (0.55H, m, 2- $\text{H}_B$ ), 2.80–2.69 (0.45H, m, 2- $\text{H}_B$ ), 2.67–2.43 (3H, m, 6- $\text{H}_B$ , 9- $\text{H}_2$ ), 1.85–1.65 (3H, m, 4- $\text{H}_2$ , 5- $\text{H}_A$ ), 1.57–1.33 (10H, m, 5- $\text{H}_B$ ,  $\text{C}(\text{Me})_3$ ), 1.24 (3H, t,  $J$  7.1 Hz, 13- $\text{H}_3$ );  $\delta_{\text{C}}$  (125 MHz,  $\text{CDCl}_3$ ) 171.6 (C=O C-10), 171.2 (C=O C-10), 155.8 (C=O Boc), 155.6 (C=O Boc), 154.8 (C=O Cbz), 136.6 (*ipso*-Ph), 128.6 (Ph), 128.1 (Ph), 127.9 (Ph), 79.9 ( $\text{C}(\text{Me})_3$ ), 67.3 ( $\text{CH}_2$  Cbz), 60.7 (C-12), 60.5 (C-12), 54.5 (C-3), 54.1 (C-3), 47.0 (C-2), 44.0 (C-6), 43.2 (C-6), 40.9 (C-8), 35.4 (C-9), 34.7 (C-9), 29.2 (C-4), 28.5 ( $\text{C}(\text{Me})_3$ ), 25.0 (C-5), 14.29 (C-13), 14.27 (C-13) (25 out of 38 signals present); HRMS found  $\text{MNa}^+$ , 457.2319.  $\text{C}_{23}\text{H}_{34}\text{N}_2\text{O}_6\text{Na}$  requires 457.2309.

### Benzyl 2-oxo-1,5-diazabicyclo[4.3.1]decane-5-carboxylate **6k**

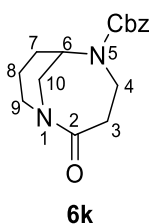

**6k** was synthesised using general method D using NaOH (50.9 mg, 0.127 mmol), amino ester **9k** (50.0 mg, 0.115 mmol), 1:1 MeOH:water (2 mL), HCl (1.3 mL, 6 N), EtOAc (0.2 mL), toluene (2 mL) and *n*- $\text{Bu}_2\text{SnO}$  (29.0 mg). The crude product was purified by flash column chromatography, eluting with 3:1 EtOAc–hexane to yield bicyclic carbamate **6k** as a 1:1 mixture of rotamers (25.4 mg, 77%) as a colourless oil,  $R_f$  0.30 (EtOAc);  $\nu_{\text{max}}/\text{cm}^{-1}$  2931, 1688 (C=O), 1657 (C=O), 1409, 1223, 1093,

1067, 1008, 735 and 698;  $\delta_{\text{H}}$  (500 MHz,  $\text{CDCl}_3$ ) 7.40–7.29 (5H, m, Ph), 5.15 (1H, d,  $J$  12.3, Cbz  $\text{CH}_2$ ), 5.11 (1H, d,  $J$  12.3, Cbz  $\text{CH}_2$ ), 4.48 (1H, app. dd,  $J$  11.6, 5.8, 6-H), 4.35 (1H, ddd,  $J$  14.0, 7.7, 6.0, 9- $\text{H}_A$ ), 4.28 (1H, app. d,  $J$  11.6, 4- $\text{H}_A$ ), 3.72 (1H, app. d,  $J$  15.6, 10- $\text{H}_A$ ), 3.36 (1H, app. t,  $J$  11.6, 4- $\text{H}_B$ ), 3.25 (1H, app. dd,  $J$  15.1, 5.0, 10- $\text{H}_B$ ), 3.05 (1H, app. dt,  $J$  14.2, 3.6, 3- $\text{H}_A$ ), 2.95 (1H, app. dt,  $J$  12.8, 5.7, 9- $\text{H}_B$ ), 2.49 (1H, ddd,  $J$  14.3, 5.4, 2.2, 3- $\text{H}_B$ ), 1.88–1.79 (1H, m, 7- $\text{H}_A$ ), 1.78–1.65 (2H, m, 8- $\text{H}_A$ , 7- $\text{H}_B$ ), 1.56–1.49 (1H, m, 8- $\text{H}_B$ );  $\delta_{\text{C}}$  (125 MHz,  $\text{CDCl}_3$ ) 176.8 (C=O C-2), 156.2 (C=O Cbz), 136.5 (*ipso*-Ph), 128.7 (Ph), 128.3 (Ph), 128.2 (Ph), 67.8 ( $\text{CH}_2$  Cbz), 50.0 (C-6), 49.4 (C-10), 45.6 (C-9), 39.8 (C-4), 36.9 (C-3), 24.0 (C-7), 20.6 (C-8); HRMS found  $\text{MNa}^+$ , 311.1374.  $\text{C}_{16}\text{H}_{20}\text{N}_2\text{O}_3\text{Na}$  requires 311.1366. Spectroscopic data are consistent with those reported in the literature.<sup>6</sup>

### ***tert*-Butyl 3-((3-ethoxy-3-oxopropyl)amino)azepane-1-carboxylate **S13****

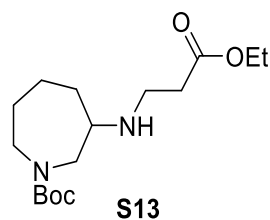

**S13** was synthesised using general method B using enecarbamate **5e** (49.3 mg, 0.25 mmol) and ethyl 3-aminopropionate hydrochloride (75.0 mg, 0.50 mmol). Reaction was performed in duplicate and the contents of the two vials combined before work-up. The crude product was purified by flash column chromatography eluting with EtOAc to yield *amino ester* **S13** as a 55:45 mixture of rotamers (56.6 mg, 36%) as a yellow oil,  $R_f$  0.11 (EtOAc);  $\nu_{\text{max}}/\text{cm}^{-1}$  2975, 2929, 2859, 1732 (C=O), 1689 (C=O), 1468, 1413, 1365, 1299, 1164 and 772;  $\delta_{\text{H}}$  (500 MHz,  $\text{CDCl}_3$ ) 4.14 (1.1H, q,  $J$  7.0 Hz, 13- $\text{H}_2$ ), 4.12 (0.9 H, q,  $J$  7.0 Hz, 13- $\text{H}_2$ ), 3.80 (0.45H, dd,  $J$  13.7, 4.0, 2- $\text{H}_A$ ), 3.73 (0.55H, dd,  $J$  13.8, 3.1, 2- $\text{H}_A$ ), 3.69 (0.55H, ddd,  $J$  14.5, 8.3, 3.0, 7- $\text{H}_A$ ), 3.50 (0.45H, ddd,  $J$  14.5, 8.3, 3.0, 7- $\text{H}_A$ ), 3.20–3.09 (1H, m, 7- $\text{H}_B$ ), 2.94 (1.1H, t,  $J$  6.0, 9- $\text{H}_2$ ), 2.93 (0.9H, t,  $J$  6.0, 9- $\text{H}_2$ ), 2.85 (0.45H, dd,  $J$  13.7, 8.6, 2- $\text{H}_B$ ), 2.81–2.72 (1H, m, 2- $\text{H}_B$ , 3-H),

2.72–2.65 (0.55H, m, 3-H), 2.48 (2H, t, *J* 5.9, 10-H<sub>2</sub>), 1.89–1.78 (1.55H, m, 4-H<sub>A</sub>, 6-H<sub>A</sub>), 1.78–1.69 (1.45H, m, 5-H<sub>A</sub>, 6-H<sub>A</sub>) 1.62–1.51 (2H, m, NH, 6-H<sub>B</sub>), 1.47 (4.95H, s, C(Me)<sub>3</sub>), 1.45 (4.05H, s, C(Me)<sub>3</sub>), 1.41–1.29 (2H, m, 4-H<sub>B</sub>, 5-H<sub>B</sub>), 1.26 (1.65H, t, *J* 7.1, 14-H<sub>3</sub>), 1.25 (1.35H, t, *J* 7.1, 14-H<sub>3</sub>);  $\delta_c$  (125 MHz, CDCl<sub>3</sub>) 173.0 (C=O C-11), 172.8 (C=O C-11), 156.0 (C=O Boc), 155.7 (C=O Boc), 79.5 (C(Me)<sub>3</sub>), 79.3 (C(Me)<sub>3</sub>), 60.6 (C-13), 60.5 (C-13), 58.4 (C-3), 57.9 (C-3), 51.2 (C-2), 50.7 (C-2), 48.0 (C-7), 46.9 (C-7), 42.9 (C-9), 35.31 (C-10), 35.27 (C-10), 35.2 (C-4), 34.2 (C-4), 28.7 (C(Me)<sub>3</sub>), 28.6 (C(Me)<sub>3</sub>), 28.0 (C-6), 27.6 (C-6), 22.9 (C-5), 22.8 (C-5), 14.4 (C-14) (21 out of 28 signals present); HRMS found MNa<sup>+</sup>, 337.2099. C<sub>16</sub>H<sub>30</sub>N<sub>2</sub>O<sub>4</sub>Na requires 337.2098.

**tert-Butyl 3-(((benzyloxy)carbonyl)(3-ethoxy-3-oxopropyl)amino)azepane-1-carboxylate 9I**

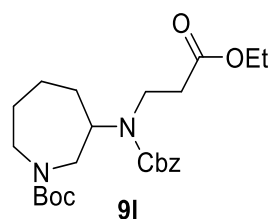

**9I** was synthesised using general method C using benzyl chloroformate (27.5  $\mu$ L, 0.193 mmol), amino ester **S13** (55.0 mg, 0.175 mmol) and NaHCO<sub>3</sub> (87.9 mg, 1.05 mmol) in DCM (2 mL) for 16 h. The crude product was purified by flash column chromatography, eluting with 75:25 hexane–EtOAc to yield *carbamate 9I* as an undetermined mixture of rotamers (72.7 mg, 93%) as a colourless oil, *R<sub>f</sub>* 0.52 (1:1 hexane–EtOAc);  $\nu_{\max}/\text{cm}^{-1}$  2974, 2933, 2869, 1731 (C=O), 1692 (C=O), 1657 (C=O), 1416, 1213, 1162, 1115, 770 and 699;  $\delta_H$  (500 MHz, CDCl<sub>3</sub>) 7.40–7.27 (5H, m, Ph), 5.19–5.06 (2H, br m, Cbz CH<sub>2</sub>), 4.19–4.03 (2H, br m, 13-H<sub>2</sub>), 3.81–2.95 (7H, m, 2-H<sub>2</sub>, 3-H, 7-H<sub>2</sub>, 9-H<sub>2</sub>), 2.72–2.49 (2H, m, 10-H<sub>2</sub>), 2.01–1.68 (4H, br m, 4-H<sub>2</sub>, 5-H<sub>A</sub>, 6-H<sub>A</sub>) 1.63–1.58 (1H, m, 6-H<sub>B</sub>), 1.52–1.37 (9H, br m, C(Me)<sub>3</sub>), 1.33–1.18 (4H, br m, 5-H<sub>B</sub>, 14-H<sub>3</sub>);  $\delta_c$  (125 MHz, CDCl<sub>3</sub>) 171.7 (C=O C-11), 171.6 (C=O C-11), 155.7, 155.4 (C=O Boc, Cbz), 136.8 (*ipso*-Ph), 128.71 (Ph), 128.67 (Ph), 128.6 (Ph), 128.1 (Ph), 127.8

(Ph), 127.1 (Ph), 80.0 (C(Me)<sub>3</sub>), 79.6 (C(Me)<sub>3</sub>), 67.4 (Cbz CH<sub>2</sub>), 67.1 (Cbz CH<sub>2</sub>), 60.7 (C-13), 60.6 (C-13), 59.6 (C-3), 49.5 (C-2), 48.9 (C-2), 46.7 (C-7), 46.1 (C-7), 43.2 (C-9), 42.7 (C-9), 35.0 (C-10), 34.4 (C-10), 32.1 (C-4), 31.6 (C-4), 28.6 (C(Me)<sub>3</sub>), 27.5 (C-6), 27.2 (C-6), 24.1 (C-5), 23.5 (C-5), 14.3 (C-14) (28 out of 40 signals present); HRMS found MH<sup>+</sup>, 449.2652. C<sub>24</sub>H<sub>37</sub>N<sub>2</sub>O<sub>6</sub> requires 449.2646.

### Benzyl 2-oxo-1,5-diazabicyclo[4.4.1]undecane-5-carboxylate **6I**

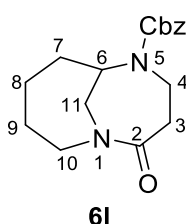

**6I** was synthesised using general method D using NaOH (6.85 mg, 0.172 mmol), amino ester **9I** (70 mg, 0.156 mmol), 1:1 MeOH:water (2.8 mL), HCl (1.7 mL, 6 N), EtOAc (0.2 mL), toluene (2 mL) and *n*-Bu<sub>2</sub>SnO (39.1 mg). The crude product was purified by flash column chromatography, eluting with EtOAc to yield *bicyclic carbamate 6I* as a 55:45 mixture of rotamers (35.8 mg, 75%) as a white solid, *R<sub>f</sub>* 0.20 (EtOAc);  $\nu_{\max}/\text{cm}^{-1}$  2931, 2858, 1689 (C=O), 1647 (C=O), 1418, 1312, 1236, 1210, 1158 and 658;  $\delta_{\text{H}}$  (500 MHz, CDCl<sub>3</sub>) 7.40–7.30 (5H, m, Ph), 5.13 (2H, s, Cbz CH<sub>2</sub>), 4.76–4.65 (0.55H, m, 6-H), 4.62–4.51 (0.45H, m, 6-H), 4.44 (1H, app. d, *J* 12.7, 10-H<sub>A</sub>), 4.38 (0.45H, app. d, *J* 11.7, 4-H<sub>A</sub>), 4.24 (0.55H, app. d, *J* 11.7, 4-H<sub>A</sub>), 3.85 (1H, app. d, *J* 16.1, 11-H<sub>A</sub>), 3.41 (1H, app. t, *J* 16.7, 11-H<sub>B</sub>), 3.31–3.14 (1H, m, 4-H<sub>B</sub>), 2.87–2.74 (1H, m, 3-H<sub>B</sub>), 2.54–2.51 (2H, m, 5-H<sub>A</sub>, 3-H<sub>B</sub>), 2.02–1.89 (1H, m, 7-H<sub>A</sub>), 1.89–1.79 (1H, m, 8-H<sub>A</sub>), 1.79–1.67 (2H, m, 9-H<sub>2</sub>), 1.56–1.30 (2H, m, 7-H<sub>B</sub>, 8-H<sub>B</sub>);  $\delta_{\text{C}}$  (125 MHz, CDCl<sub>3</sub>) 172.80 (C=O C-2), 172.75 (C=O C-4), 155.5 (C=O Cbz), 136.6 (*ipso*-Ph), 136.5 (*ipso*-Ph), 128.7 (Ph), 128.3 (Ph), 128.2 (Ph), 67.7 (CH<sub>2</sub> Cbz), 53.6 (C-11), 53.5 (C-11), 53.0 (C-6), 52.7 (C-6), 48.6 (C-10), 38.2 (C-3), 38.0 (C-3), 36.9 (C-4), 29.8 (C-9), 29.7 (C-9), 28.2 (C-7), 27.5 (C-7), 23.2 (C-8) (22 out of 30 signals present); HRMS

found  $\text{MH}^+$ , 303.1702.  $\text{C}_{17}\text{H}_{23}\text{N}_2\text{O}_3$  requires 303.1703. X-ray crystallographic data was collected. CCDC deposition number 2192693:

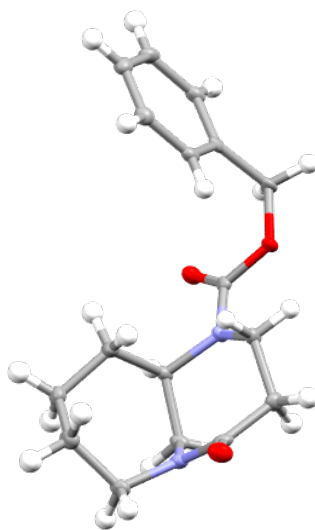

## 5. Synthesis of Bicyclic Anilines

### *tert*-Butyl 3-((2-bromobenzyl)amino)pyrrolidine-1-carboxylate **S14**

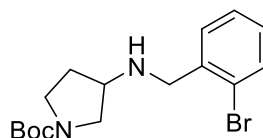

**S14**

**S14** was synthesised using general method E using *N*-Boc-2,3-dihydro-1H-pyrrole (42.3 mg, 0.25 mmol, supplier: Sigma Aldrich). Reaction was performed in quadruplicate and the contents of the four vials combined before work-up. The crude product was purified by flash column chromatography eluting with 2:1 hexane–EtOAc to yield *amine S14* as a 1:1 mixture of rotamers (242 mg, 68%) as a pale yellow oil,  $R_f$  0.34 (EtOAc);  $\nu_{\max}/\text{cm}^{-1}$  2974, 2931, 2876, 1699 (C=O), 1404, 1365, 1168, 1119, 1025 and 752;  $\delta_{\text{H}}$  (500 MHz,  $\text{CDCl}_3$ ) 7.54 (1H, d,  $J$  7.9, 3-Ar), 7.38 (1H, app. t,  $J$  7.4, 6-Ar), 7.28 (1H, t,  $J$  6.8, 5-Ar), 7.13 (1H, t,  $J$  7.3, 4-Ar), 3.88 (1H, s, benzyl  $\text{CH}_2$ ), 3.85 (1H, s, benzyl  $\text{CH}_2$ ), 3.60–3.41 (1H, m, 2- $\text{H}_A$ , 5- $\text{H}_A$ ), 3.41–3.28 (2H, br m, 3-H, 5- $\text{H}_B$ ), 3.20 (0.5H, dd,  $J$  10.9, 4.7, 2- $\text{H}_B$ ), 3.12 (0.5H, dd,  $J$  10.7, 5.1, 2- $\text{H}_B$ ), 2.08–1.98 (1H, br m, 4- $\text{H}_A$ ), 1.82–1.70 (1H, br m, 4- $\text{H}_B$ ), 1.58 (1H, br s, NH), 1.45 (9H, s,  $\text{C}(\text{Me})_3$ );  $\delta_{\text{C}}$  (125 MHz,  $\text{CDCl}_3$ ) 154.8 (C=O Boc), 139.2 (*ipso*-Ar-2), 139.1 (*ipso*-Ar-2), 133.0 (Ar-3), 130.6 (Ar-6), 130.5 (Ar-6), 129.0 (Ar-5), 127.7 (Ar-4), 124.1 (*ipso*-Ar-1), 79.3 ( $\text{C}(\text{Me})_3$ ), 57.3 (C-3), 56.2 (C-3), 52.3 (benzyl  $\text{CH}_2$ ), 52.1 (C-2), 51.6 (C-2), 44.5 (C-5), 44.2 (C-5), 31.5 (C-4), 31.3 (C-4), 28.7 ( $\text{C}(\text{Me})_3$ ) (20 out of 28 signals present); HRMS found  $\text{MH}^+$ , 355.1021.  $\text{C}_{16}\text{H}_{24}^{79}\text{BrN}_2\text{O}_2$  requires 355.1016.

**tert-Butyl  
carboxylate 11a**

**3-(((benzyloxy)carbonyl)(2-bromobenzyl)amino)pyrrolidine-1-**

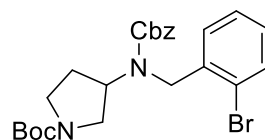

**11a**

**11a** was synthesised using general method C using benzyl chloroformate (104  $\mu\text{L}$ , 0.730 mmol), amine **S14** (235 mg, 0.664 mmol) and  $\text{NaHCO}_3$  (334 mg, 3.98 mmol) in DCM (6 mL) for 72 h. The crude product was purified by flash column chromatography, eluting with 80:20 hexane–EtOAc to yield *carbamate 11a* as 1:1 mixture of rotamers (313 mg, 97%) as a colourless oil,  $R_f$  0.53 (1:1 hexane-EtOAc);  $\nu_{\text{max}}/\text{cm}^{-1}$  2974, 2882, 1695 (C=O), 1442, 1169, 1135 and 749;  $\delta_{\text{H}}$  (500 MHz,  $\text{CDCl}_3$ ) 7.53 (1H, app. t,  $J$  7.3, 3-Ar), 7.44–7.01 (8H, br m, 4,5,6-Ar, Ph), 5.30–5.02 (2H, br m, Cbz  $\text{CH}_2$ ), 4.87–4.64 (1H, br m, 3-H), 4.62–4.39 (2H, s, benzyl  $\text{CH}_2$ ), 3.64–3.53 (1H, m, 2- $\text{H}_A$ ), 3.51–3.44 (0.5H, br m, 5- $\text{H}_A$ ), 3.44–3.35 (0.5H, br m, 5- $\text{H}_B$ ), 3.28–3.17 (1H, br m, 5- $\text{H}_B$ ), 3.14 (1H, dd,  $J$  9.6, 5.1, 2- $\text{H}_B$ ), 2.06–1.78 (2H, br m, 4- $\text{H}_2$ ), 1.42 (9H, s,  $\text{C}(\text{Me})_3$ );  $\delta_{\text{C}}$  (125 MHz,  $\text{CDCl}_3$ ) 156.5 (C=O Cbz), 154.5 (C=O Boc), 137.4 (*ipso*-Ar-2), 136.4 (*ipso*-Ph), 132.9 (Ar-3), 128.7, 128.6, 128.2, 128.1, 127.7, 127.1 (Ar-4,5,6, Ph), 122.2 (*ipso*-Ar-1), 79.7 ( $\text{C}(\text{Me})_3$ ), 67.6 (Cbz  $\text{CH}_2$ ), 55.6 (C-3), 54.9 (C-3), 47.7 (benzyl  $\text{CH}_2$ ), 47.1 (C-2), 44.3 (C-5), 43.9 (C-5), 29.0 (C-4), 28.6 ( $\text{C}(\text{Me})_3$ ) (22 out of 40 signals present); HRMS found  $\text{MH}^+$ , 489.1390.  $\text{C}_{24}\text{H}_{30}^{79}\text{BrN}_2\text{O}_4$  requires 489.1383.

**Benzyl 3,4-dihydro-2H-1,4-methanobenzo[b][1,5]diazocine-5(6H)-carboxylate 7a**

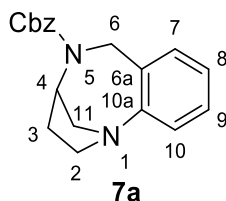



**7a** was synthesised using general method F using carbamate **11a** (299 mg, 0.612 mmol), HCl (6.8 mL, 6 N), EtOAc (1 mL), Pd<sub>2</sub>(dba)<sub>3</sub> (22.5 mg), BINAP (30.5 mg), NaOtBu (118 mg, 1.16 mmol) and toluene (5 mL). Heated at reflux for 16 h. The crude product was purified by flash column chromatography, eluting with 1:1 hexane–EtOAc to yield *carbamate 7a* as a 55:45 mixture of rotamers (120 mg, 64%) as a brown oil, *R*<sub>f</sub> 0.28 (EtOAc);  $\nu_{\text{max}}/\text{cm}^{-1}$  2948, 2877, 1687 (C=O), 1485, 1449, 1408, 1346, 1332, 1222, 1123, 1093, 763, 735 and 697;  $\delta_{\text{H}}$  (500 MHz, CDCl<sub>3</sub>) 7.39–7.28 (5H, m, Ph), 7.23–7.14 (1H, br m, Ar), 7.13–7.09 (1H, br m, Ar), 7.05–6.97 (2H, br m, 7-Ar, Ar), 5.19–5.05 (2H, br m, Cbz CH<sub>2</sub>), 4.58 (0.45H, app. t, *J* 4.0, 4-H), 4.51 (0.55H, app. t, *J* 4.9, 4-H), 4.93 (0.55H, d, *J* 16.4, 6-H<sub>A</sub>), 4.77 (0.45H, d, *J* 16.6, 6-H<sub>A</sub>), 4.74–4.68 (1H, m, 6-H<sub>B</sub>), 3.42 (0.45H, ddd, *J* 12.2, 9.7, 6.7, 2-H<sub>A</sub>), 3.35 (0.55H, ddd, *J* 12.1, 9.9, 6.8, 2-H<sub>A</sub>), 3.27–3.18 (1H, br m, 3-H<sub>B</sub>), 3.84 (0.55H, app. d, *J* 14.0, 11-H<sub>A</sub>), 3.76 (0.45H, app. d, *J* 13.9, 11-H<sub>A</sub>), 2.93 (0.45H, dd, *J* 13.9, 3.9, 11-H<sub>B</sub>), 2.87 (0.55H, dd, *J* 14.0, 4.2, 11-H<sub>B</sub>), 2.23–2.13 (1.45H, br m, 3-H<sub>2</sub>), 2.13–2.05 (0.55H, br m, 3-H<sub>2</sub>);  $\delta_{\text{C}}$  (125 MHz, CDCl<sub>3</sub>) 155.9 (C=O Cbz), 155.4 (C=O Cbz), 152.6 (C-10a), 152.0 (C-10a), 132.2 (C-6a), 131.5 (C-6a), 136.8 (*ipso*-Ph), 130.4, 130.0, 128.7, 128.63, 128.61, 128.1, 128.0, 127.6 (Ar-8/9/10, Ph), 124.3 (C-7), 124.2 (C-7), 67.5 (Cbz CH<sub>2</sub>), 67.3 (Cbz CH<sub>2</sub>), 58.3 (C-4), 57.8 (C-4), 56.8 (C-2), 56.7 (C-2), 55.5 (C-11), 54.9 (C-11), 47.1 (C-6), 46.9 (C-6), 34.9 (C-3), 33.5 (C-3) (29 out of 34 signals present); HRMS found MNa<sup>+</sup>, 331.1416. C<sub>19</sub>H<sub>20</sub>N<sub>2</sub>O<sub>2</sub>Na requires 331.1417.

***tert*-Butyl 3-((2-bromobenzyl)amino)piperidine-1-carboxylate S15**

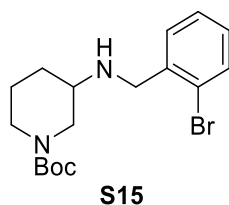

**S15** was synthesised using general method E using enecarbamate **5c** (45.8 mg, 0.25 mmol). Reaction was performed in quadruplicate and the contents of the four vials

combined before work-up. The crude product was purified by flash column chromatography eluting with 2:1 hexane–EtOAc to yield *amine* **S15** as a 1:1 mixture of rotamers (255 mg, 69%) as a colourless oil,  $R_f$  0.39 (EtOAc);  $\nu_{\max}/\text{cm}^{-1}$  2974, 2930, 2856, 1686 (C=O), 1420, 1364, 1260, 1238, 1174, 1150, 1024 and 750;  $\delta_H$  (500 MHz,  $\text{CDCl}_3$ ) 7.53 (1H, d,  $J$  5.5, 3-Ar), 7.41 (1H, dd,  $J$  7.6, 1.6, 6-Ar), 7.28 (1H, td,  $J$  7.5, 0.9, 5-Ar), 7.12 (1H, td,  $J$  7.8, 1.5, 4-Ar), 4.25–3.93 (1H, m, 2- $\text{H}_A$ ), 3.93 (1H, d,  $J$  13.8, benzyl  $\text{CH}_2$ ), 3.86 (1H, d,  $J$  13.8, benzyl  $\text{CH}_2$ ), 3.86–3.74 (1H, br m, 6- $\text{H}_A$ ), 3.00–2.65 (2H, m, 2- $\text{H}_B$ , 6- $\text{H}_B$ ), 2.64–2.52 (1H, m, 3-H), 1.97–1.86 (1H, br m, 4- $\text{H}_A$ ), 1.74–1.64 (1H, br m, 5- $\text{H}_A$ ), 1.63–1.48 (2H, m, NH, 5- $\text{H}_A$ ), 1.46 (9H, s,  $\text{C}(\text{Me})_3$ ), 1.40–1.29 (1H, br m, 4- $\text{H}_B$ );  $\delta_C$  (125 MHz,  $\text{CDCl}_3$ ) 155.1 (C=O Boc), 139.5 (*ipso*-Ar-2), 133.0 (Ar-3), 130.4 (Ar-6), 128.8 (Ar-5), 127.6 (Ar-4), 124.1 (*ipso*-Ar-1), 79.6 ( $\text{C}(\text{Me})_3$ ), 53.2 (C-3), 51.2 (benzyl  $\text{CH}_2$ ), 49.5 (C-2), 48.9 (C-2), 44.9 (C-6), 44.1 (C-6), 31.7 (C-4), 28.6 ( $\text{C}(\text{Me})_3$ ), 23.7 (C-5) (17 out of 30 signals present); HRMS found  $\text{MNa}^+$ , 391.0994.  $\text{C}_{17}\text{H}_{25}^{79}\text{BrN}_2\text{O}_2\text{Na}$  requires 391.0992.

**tert-Butyl 3-(((benzyloxy)carbonyl)(2-bromobenzyl)amino)piperidine-1-carboxylate 11b**

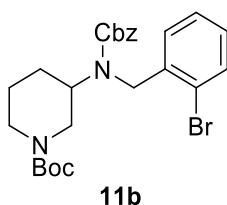

**11b** was synthesised using general method C using benzyl chloroformate (103  $\mu\text{L}$ , 0.721 mmol), amine **S15** (241 mg, 0.655 mmol) and  $\text{NaHCO}_3$  (329 mg, 3.93 mmol) in DCM (6 mL) for 72 h. The crude product was purified by flash column chromatography, eluting with 75:25 hexane–EtOAc to yield *carbamate* **11b** as an undetermined mixture of rotamers (243 mg, 74%) as a colourless oil,  $R_f$  0.65 (1:1 hexane–EtOAc);  $\nu_{\max}/\text{cm}^{-1}$  3055, 2978, 2861, 1686 (C=O), 1413, 1264, 1240, 1149, 731 and 699;  $\delta_H$  (500 MHz,  $\text{CDCl}_3$ ) 7.52 (1H, d,  $J$  7.9, 3-Ar), 7.46–7.14 (7H, br m, 5-Ar,

6-Ar, Ph), 7.1 (1H, t,  $J$  7.5, 4-Ar), 4.29–5.04 (2H, br m, Cbz CH<sub>2</sub>), 4.68–4.40 (2H, br m, benzyl CH<sub>2</sub>), 4.22–3.79 (3H, br m, 2-H<sub>A</sub>, 3-H, 6-H<sub>A</sub>), 2.93–2.62 (1H, br m, 2-H<sub>B</sub>), 2.59–2.41 (1H, m, 6-H<sub>B</sub>), 1.89–1.75 (1H, br m, 4-H<sub>A</sub>), 1.73–1.59 (2H, br m, 4-H<sub>B</sub>, 5-H<sub>A</sub>), 1.56–1.31 (10H, br m, C(Me)<sub>3</sub>, 5-H<sub>B</sub>);  $\delta_c$  (125 MHz, CDCl<sub>3</sub>) 154.8 (C=O Boc), 137.7 (*ipso*-Ar-2), 136.6 (*ipso*-Ph), 132.8 (Ar-3), 128.64, 128.57, 128.1, 128.0, 127.6 (Ar-4,5,6, Ph), 122.3 (*ipso*-Ar-1), 79.8 (C(Me)<sub>3</sub>), 67.9 (Cbz CH<sub>2</sub>), 67.4 (Cbz CH<sub>2</sub>), 54.2 (C-3), 48.4 (benzyl CH<sub>2</sub>), 47.0 (C-2), 44.1 (C-6), 43.4 (C-6), 29.1 (C-4), 28.5 (C(Me)<sub>3</sub>), 25.0 (C-5) (21 out of 42 signals present); HRMS found MH<sup>+</sup>, 503.1555. C<sub>25</sub>H<sub>32</sub><sup>79</sup>BrN<sub>2</sub>O<sub>4</sub> requires 503.1540.

**Benzyl 2,3,4,5-tetrahydro-1,5-methanobenzo[b][1,5]diazonine-6(7H)-carboxylate 7b**

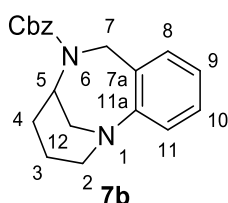

**7b** was synthesised using general method F using carbamate **11b** (120 mg, 0.239 mmol), HCl (2.6 mL, 6 N), EtOAc (0.4 mL), Pd<sub>2</sub>(dba)<sub>3</sub> (8.8 mg), BINAP (11.9 mg), NaOtBu (46.0 mg, 0.454 mmol) and toluene (4 mL). Heated at reflux for 16 h. The crude product was purified by flash column chromatography, eluting with 2:1 hexane–EtOAc to yield *carbamate 7b* as a 60:40 mixture of rotamers (28.1 mg, 37%) as a yellow oil,  $R_f$  0.65 (1:1 hexane–EtOAc);  $\nu_{\max}/\text{cm}^{-1}$  3061, 3060, 2924, 2860, 1689 (C=O), 1490, 1400, 1346, 1177, 1074, 747 and 697;  $\delta_H$  (500 MHz, CDCl<sub>3</sub>) 7.40–7.29 (5H, m, Ph), 7.16 (1H, app. td,  $J$  7.5, 1.0, 10-H), 7.07–7.00 (1H, br m, 8-H), 6.97 (1H, d,  $J$  8.0, 11-H), 6.84 (1H, app. td,  $J$  7.5, 1.0, 9-H), 5.27–4.98 (3H, br m, 7-H<sub>A</sub>, Cbz CH<sub>2</sub>), 4.81 (1H, d,  $J$  16.6, 7-H<sub>B</sub>), 4.04 (1H, dd,  $J$  15.7, 2.2, 12-H<sub>A</sub>), 3.84 (1H, app. s, 5-H), 3.65 (1H, dd,  $J$  13.6, 1.6, 2-H<sub>A</sub>), 3.29–3.15 (2H, m,  $J$  2-H<sub>B</sub>, 12-H<sub>B</sub>), 3.00–2.47 (1H, br m, 4-H<sub>A</sub>), 1.80 (0.4H, dt,  $J$  6.6, 3.6, 3-H<sub>A</sub>), 1.64 (1H, app. tt,  $J$  13.9, 3.3, 4-H<sub>B</sub>), 1.73 (0.6H,

dt,  $J$  6.6, 3.6, 3-H<sub>A</sub>), 1.23–1.12 (1H, br m, 3-H<sub>B</sub>);  $\delta_C$  (125 MHz, CDCl<sub>3</sub>) 149.3 (C-11a), 136.8 (*ipso*-Ph), 130.4 (Ar-8), 129.1 (C-7a), 128.7 (Ar-10), 128.5 (Ph), 128.1 (Ph), 128.0 (Ph), 124.5 (C-11), 121.4 (C-9), 67.4 (Cbz CH<sub>2</sub>), 53.5 (C-5), 52.6 (C-5), 57.2 (C-2), 50.8 (C-12), 49.8 (C-7), 28.6 (C-4), 30.3 (C-4), 18.0 (C-3) (19 out of 36 signals present); HRMS found MH<sup>+</sup>, 323.1756. C<sub>20</sub>H<sub>23</sub>N<sub>2</sub>O<sub>2</sub> requires 323.1754.

***tert*-Butyl 3-((*N*-(2-bromobenzyl)-4-methylphenyl)sulfonamido)piperidine-1-carboxylate **11c****

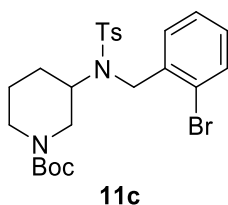

Tosyl chloride (179 mg, 0.937 mmol), DIPEA (155  $\mu$ L, 0.937 mmol) and DMAP (3.8 mg, 5 mol%) were added in sequence to a mixture of amino ester **S15** (230 mg, 0.625 mmol) in DCM (6 mL). The mixture was stirred for 16 h at room temperature, and the solvent evaporated under reduced pressure to give a crude product. The crude product was purified by flash column chromatography, eluting with 75:25 hexane–EtOAc to yield *carbamate* **11c** as an undetermined mixture of rotamers (210 mg, 64%) as a colourless oil,  $R_f$  0.24 (8:2 hexane–EtOAc);  $\nu_{\max}/\text{cm}^{-1}$  2974, 2930, 2862, 1689 (C=O), 1419, 1341, 1265, 1241, 1091, 856, 753 and 656;  $\delta_H$  (500 MHz, CDCl<sub>3</sub>) 7.76 (2H, d,  $J$  8.3 Ts Ar), 7.68 (1H, d,  $J$  7.7, 6-Ar), 7.48 (1H, d,  $J$  7.9, 3-Ar), 7.35–7.29 (3H, m, 5-Ar, Ts Ar), 7.12 (1H, t,  $J$  7.4, 4-Ar), 4.56–4.39 (2H, br m, benzyl CH<sub>2</sub>), 4.05–3.86 (2H, br m, 2-H<sub>A</sub>, 6-H<sub>A</sub>), 3.84–3.64 (1H, m, 3-H), 2.58–2.29 (5H, m, 2-H<sub>B</sub>, 6-H<sub>B</sub>, Me), 1.67–1.53 (2H, br m, 4-H<sub>A</sub>, 5-H<sub>A</sub>), 1.44–1.32 (11H, m, 4-H<sub>B</sub>, 5-H<sub>B</sub>, C(Me)<sub>3</sub>);  $\delta_C$  (125 MHz, CDCl<sub>3</sub>) 154.5 (C=O Boc), 143.6 (Ts *ipso*-Ar), 137.9 (*ipso*-Ar-2), 137.4 (Ts *ipso*-Ar), 132.5 (Ar-3), 130.0 (Ts Ar), 129.9 (Ar-6), 129.0 (Ar-5), 127.8 (Ar-4), 127.1 (Ts Ar), 122.0 (*ipso*-Ar-1), 79.9 (C(Me)<sub>3</sub>), 53.5 (C-3), 48.2 (C-2), 47.8 (benzyl CH<sub>2</sub>), 47.0 (C-2), 43.9 (C-6), 43.1 (C-6), 29.3 (C-4), 28.4 (C(Me)<sub>3</sub>), 25.0 (C-5), 21.6

(Me) (22 out of 40 signals present); HRMS found  $MH^+$ , 523.1274.  $C_{24}H_{32}^{79}BrN_2O_4S$  requires 523.1261.

### 6-Tosyl-2,3,4,5,6,7-hexahydro-1,5-methanobenzo[b][1,5]diazonine **7c**

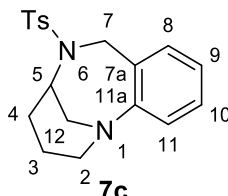

**7c** was synthesised using general method F using carbamate **11c** (200 mg, 0.383 mmol), HCl (4.2 mL, 6 N), EtOAc (0.5 mL),  $Pd_2(dba)_3$  (14.1 mg), BINAP (19.1 mg), NaOtBu (73.8 mg, 0.723 mmol) and toluene (5 mL). Heated at reflux for 16 h. The crude product was purified by flash column chromatography, eluting with 1:1 hexane–EtOAc to yield *carbamate 7c* (59.2 mg, 45%) as a brown oil,  $R_f$  0.40 (1:1 hexane–EtOAc);  $\nu_{max}/cm^{-1}$  3054, 2921, 2860, 1491, 1336, 1189, 1101, 729 and 679;  $\delta_H$  (500 MHz,  $CDCl_3$ )  $\delta_H$  (500 MHz,  $CDCl_3$ ) 7.72 (2H, d,  $J$  8.3, Ts Ar), 7.31 (2H, d,  $J$  8.0, Ts Ar), 7.15 (1H, app. t,  $J$  7.2, 10-H), 6.98 (1H, dd,  $J$  7.7, 1.4, 8-H), 6.93 (1H, dd,  $J$  8.2, 0.9, 11-H), 6.82 (1H, app. td,  $J$  7.5, 1.1, 9-H), 4.67 (1H, d,  $J$  15.7, 7- $H_A$ ), 4.46 (1H, d,  $J$  15.6, 7- $H_B$ ), 3.78 (1H, dd,  $J$  15.7, 2.2, 12- $H_A$ ), 3.64 (1H, dd,  $J$  13.8, 1.9, 2- $H_A$ ), 3.56–3.51 (1H, br m, 5-H), 3.23–3.12 (2H, m, 2- $H_B$ , 12- $H_B$ ), 2.79 (1H, ddq,  $J$  14.1, 5.5, 3.0, 4- $H_A$ ), 2.43 (3H, s, Me), 1.93 (1H, app. qt,  $J$  13.3, 3.8, 3- $H_A$ ), 1.71 (1H, app. tt,  $J$  13.8, 3.3, 4- $H_B$ ), 1.24–1.17 (1H, br m, 3- $H_B$ );  $\delta_C$  (125 MHz,  $CDCl_3$ ) 149.2 (C-11a), 143.6 (*ipso*-Ar Ts), 135.1 (*ipso*-Ar Ts), 130.6 (C-8), 129.8 (Ar Ts), 128.7 (C-10), 128.0 (C-7a), 127.7 (Ar Ts), 124.2 (Ar-11), 121.4 (C-9), 56.6 (C-2), 54.3 (C-5), 51.8 (C-7), 50.9 (C-12), 31.6 (C-4), 21.7 (Me), 17.9 (C-3); HRMS found  $MNa^+$ , 365.1296.  $C_{19}H_{22}N_2O_2SNa$  requires 365.1294.

**tert-Butyl 3-((2-bromobenzyl)amino)azepane-1-carboxylate S16**

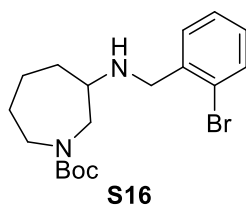

**S16** was synthesised using general method E using enecarbamate **5e** (49.3 mg, 0.25 mmol). Reaction was performed in quadruplicate and the contents of the four vials combined before work-up. The crude product was purified by flash column chromatography eluting with 2:1 hexane–EtOAc to yield *amine S16* as a 55:45 mixture of rotamers (94.6 mg, 25%) as a yellow oil,  $R_f$  0.39 (EtOAc);  $\nu_{\max}/\text{cm}^{-1}$  2973, 2926, 2858, 1684 (C=O), 1466, 1412, 1364, 1160, 1044 and 750;  $\delta_{\text{H}}$  (500 MHz,  $\text{CDCl}_3$ ) 7.54 (0.55H, d,  $J$  8.0, 3-Ar), 7.52 (0.45H, d,  $J$  8.0, 3-Ar), 7.47 (0.45H, d,  $J$  7.5, 6-Ar), 7.41 (0.55H, d,  $J$  7.5, 6-Ar), 7.31–7.26 (1H, m, 5-Ar), 7.15–7.07 (1H, m, 4-Ar), 3.86 (0.45H, dd,  $J$  14.1, 3.6, 2- $\text{H}_A$ ), 3.78 (0.55H, dd,  $J$  14.1, 3.6, 2- $\text{H}_A$ ), 3.91 (0.9H, s, benzyl  $\text{CH}_2$ ), 3.89 (1.1H, s, benzyl  $\text{CH}_2$ ), 3.68 (0.55H, ddd,  $J$  13.2, 7.6, 5.1, 7- $\text{H}_A$ ), 3.48 (0.45H, ddd,  $J$  13.1, 7.6, 5.1, 7- $\text{H}_A$ ), 3.23 (0.45H, app. td,  $J$  13.9, 5.9, 7- $\text{H}_B$ ), 3.16 (0.55H, app. td,  $J$  13.6, 5.5, 7- $\text{H}_B$ ), 3.00 (0.45H, dd,  $J$  13.9, 8.3, 2- $\text{H}_B$ ), 2.88 (0.55H, dd,  $J$  14.1, 8.9, 2- $\text{H}_B$ ), 2.87–2.81 (0.45H, m, 3-H), 2.74–2.81 (0.55H, m, 3-H), 1.93–1.71 (3H, m, 4- $\text{H}_A$ , 5- $\text{H}_A$ , 6- $\text{H}_A$ ), 1.61–1.54 (2H, br m, NH, 6- $\text{H}_B$ ), 1.47 (4.05H, s,  $\text{C}(\text{Me})_3$ ), 1.45 (4.95H, s,  $\text{C}(\text{Me})_3$ ), 1.43–1.33 (2H, m, 4- $\text{H}_B$ , 5- $\text{H}_B$ );  $\delta_{\text{C}}$  (125 MHz,  $\text{CDCl}_3$ ) 156.0 (C=O Boc), 155.7 (C=O Boc), 139.6 (*ipso*-Ar-2), 133.0 (Ar-3), 132.8 (Ar-3), 130.8 (Ar-6), 130.2 (Ar-6), 128.8 (Ar-5), 128.7 (Ar-5), 127.7 (Ar-4), 127.6 (Ar-4), 124.13 (*ipso*-Ar-1), 124.05 (*ipso*-Ar-1), 78.0 ( $\text{C}(\text{Me})_3$ ), 79.3 ( $\text{C}(\text{Me})_3$ ), 57.9 (C-3), 57.5 (C-3), 51.7 (benzyl  $\text{CH}_2$ ), 51.6 (benzyl  $\text{CH}_2$ ), 51.1 (C-2), 50.9 (C-2), 48.1 (C-7), 47.1 (C-7), 35.1 (C-4), 34.1 (C-4), 28.7 ( $\text{C}(\text{Me})_3$ ), 28.6 ( $\text{C}(\text{Me})_3$ ), 28.0 (C-6), 27.7 (C-6), 23.0 (C-5), 22.7 (C-5) (31 out of 32 signals present); HRMS found  $\text{MH}^+$ , 383.1339.  $\text{C}_{18}\text{H}_{28}^{79}\text{BrN}_2\text{O}_2$  requires 383.1329.

**tert-Butyl 3-(((benzyloxy)carbonyl)(2-bromobenzyl)amino)azepane-1-carboxylate**  
**11d**

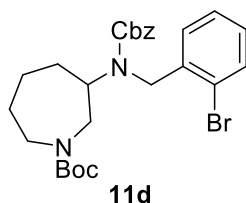

**11d** was synthesised using general method C using benzyl chloroformate (38  $\mu$ L, 0.266 mmol), amine **S16** (92.3 mg, 0.242 mmol) and  $\text{NaHCO}_3$  (122 mg, 1.45 mmol) in DCM (2 mL) for 72 h. The crude product was purified by flash column chromatography, eluting with 80:20 hexane–EtOAc to yield *carbamate* **11d** as 60:40 mixture of rotamers (101 mg, 81%) as a colourless oil,  $R_f$  0.67 (1:1 hexane-EtOAc);  $\nu_{\text{max}}/\text{cm}^{-1}$  2973, 2930, 2864, 1691 (C=O), 1414, 1365, 1249, 1162 and 749;  $\delta_{\text{H}}$  (500 MHz,  $\text{CDCl}_3$ ) 7.52 (1H, app. t,  $J$  8.6, 3-Ar), 7.47–7.05 (8H, br m, Ar), 5.22 (0.8H, br s, Cbz  $\text{CH}_2$ ), 5.11 (1.2H, br s, Cbz  $\text{CH}_2$ ), 4.72–4.41 (2H, br m, benzyl  $\text{CH}_2$ ), 4.00–3.81 (1H, m, 3-H), 3.82–3.73 (0.4H, br m, 2- $\text{H}_A$ ), 3.72–3.64 (0.6H, br m, 2- $\text{H}_A$ ), 3.58 (0.6H, ddd,  $J$  14.4, 8.8, 5.8, 7- $\text{H}_A$ ), 3.54–3.20 (1.4H, br m, 7- $\text{H}_B$ , 2- $\text{H}_B$ ), 3.19–2.99 (1H, br m, 7- $\text{H}_A$ , 2- $\text{H}_B$ ), 1.92–1.62 (4H, m, 4- $\text{H}_2$ , 5- $\text{H}_A$ , 6- $\text{H}_A$ ), 1.60–1.33 (10H, s,  $\text{C}(\text{Me})_3$ , 6- $\text{H}_B$ ), 1.33–1.16 (1H, m, 5- $\text{H}_B$ );  $\delta_{\text{C}}$  (125 MHz,  $\text{CDCl}_3$ ) 156.6, 156.0, 155.8, 155.5 (C=O Boc/Cbz), 137.8 (*ipso*-Ar-2), 137.6 (*ipso*-Ar-2), 136.7 (*ipso*-Ph), 136.5 (*ipso*-Ph), 132.8 (Ar-3), 132.7 (Ar-3), 128.6, 128.5, 128.2, 128.0, 127.9, 127.8, 127.7, 127.5, 127.0 (Ar-4,5,6, Ph), 122.6 (*ipso*-Ar-1), 122.4 (*ipso*-Ar-1), 79.8 ( $\text{C}(\text{Me})_3$ ), 79.5 ( $\text{C}(\text{Me})_3$ ), 67.8 (Cbz  $\text{CH}_2$ ), 67.1 (Cbz  $\text{CH}_2$ ), 59.0 (C-3), 58.7 (C-3), 49.8 (benzyl  $\text{CH}_2$ ), 49.7 (benzyl  $\text{CH}_2$ ), 49.4 (C-2), 49.2 (C-2), 47.0 (C-7), 46.1 (C-7), 31.9 (C-4), 31.3 (C-4), 28.6 ( $\text{C}(\text{Me})_3$ ), 28.5 ( $\text{C}(\text{Me})_3$ ), 27.7 (C-6), 27.3 (C-6), 24.3 (C-5), 23.6 (C-5) (41 out of 44 signals present); HRMS found  $\text{MH}^+$ , 517.1705.  $\text{C}_{26}\text{H}_{34}^{79}\text{BrN}_2\text{O}_4$  requires 517.1696.

**Benzyl 3,4,5,6-tetrahydro-2H-1,6-methanobenzo[b][1,5]diazecine-7(8H)-carboxylate 7d**

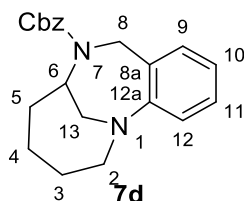

HCl (0.7 mL of a 6 M solution) was added to a solution of *N*-Boc amine **11d** (33.2 mg, 0.0659 mmol) in EtOAc (0.2 mL) and stirred for 3 h. The solvent was then removed under reduced pressure to give the NH amine. Pd(OAc)<sub>2</sub> (1.3 mg, 10 mol%), BINAP (8.1 mg, 2 mol%), Cs<sub>2</sub>CO<sub>3</sub> (23.8 mg, 0.0725 mmol) and toluene (3 mL) were then added and the resulting mixture stirred at 110 °C for 96 h. The mixture was then allowed to cool to rt, filtered through celite, and washed with DCM (20 mL). The solvent was then removed under reduced pressure to give a crude product. The crude product was purified by flash column chromatography, eluting with 2:1 hexane–EtOAc to yield *carbamate 7d* (7.4 mg, 33%) as a colourless oil, *R*<sub>f</sub> 0.57 (1:1 hexane–EtOAc);  $\nu_{\text{max}}/\text{cm}^{-1}$  3064, 3031, 2925, 2855, 1690 (C=O), 1599, 1493, 1414, 1303, 1244, 1157, 748 and 698;  $\delta_{\text{H}}$  (500 MHz, CDCl<sub>3</sub>) 7.39–7.28 (5H, m, Ph), 7.14–7.09 (1H, m, 11-H), 7.03 (1H, d, *J* 6.7, 9-H), 6.78 (1H, d, *J* 8.3, 12-H), 6.63, (1H, td, *J* 7.4, 1.0, 10-H), 5.16 (1H, d, *J* 12.4, Cbz CH<sub>2</sub>), 5.13 (1H, d, *J* 12.4, Cbz CH<sub>2</sub>), 5.08 (1H, d, *J* 15.5, 8-H<sub>A</sub>), 4.77–4.62 (1H, br m, 8-H<sub>B</sub>), 4.43–4.17 (2H, br m, 6-H, 13-H<sub>A</sub>), 4.07 (1H, app. d, *J* 14.2, 2-H<sub>A</sub>), 3.33 (1H, dd, *J* 16.4, 5.0, 13-H<sub>B</sub>), 2.92 (1H, app. t, *J* 12.1, 2-H<sub>A</sub>), 2.44–2.34 (1H, m, 5-H<sub>A</sub>), 1.83–1.70 (2H, br m, 3-H<sub>A</sub>, 4-H<sub>A</sub>), 1.68–1.59 (1H, br m, 3-H<sub>B</sub>), 1.53–1.36 (2H, br m, 4-H<sub>B</sub>, 5-H<sub>B</sub>);  $\delta_{\text{C}}$  (125 MHz, CDCl<sub>3</sub>) 155.1 (C=O Cbz), 149.0 (C-12a), 137.0 (*ipso*-Ph), 132.4 (C-9), 129.0 (C-11), 128.5 (Ph), 127.94 (Ph), 127.88 (Ph), 123.5 (8a), 118.1 (C-10), 115.6 (C-12), 67.1 (Cbz CH<sub>2</sub>), 57.6 (C-3), 54.8 (C-2), 53.9 (C-13), 48.7 (C-8), 32.2 (C-5), 28.2 (C-3), 25.5 (C-4); HRMS found MH<sup>+</sup>, 337.1914. C<sub>21</sub>H<sub>25</sub>N<sub>2</sub>O<sub>2</sub> requires 337.1911.



**(E)-1-Bromo-2-(2-nitrovinyl)benzene S17**<sup>14</sup>

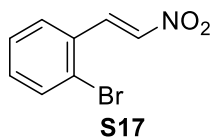

2-Bromobenzaldehyde (5.84 mL, 50.0 mmol) was added to a mixture of NH<sub>4</sub>OAc (6.76 g) in AcOH (140 mL). Nitromethane (9.25 mL) was slowly added with stirring over 5 min. The mixture was heated at reflux for 4h and then ice-cold water (100 mL) added. The organics were extracted with DCM (100 mL), dried (MgSO<sub>4</sub>) and the solvent evaporated under reduced pressure to give a crude product. The crude product was purified by flash column chromatography, eluting with 80:20 hexane–Et<sub>2</sub>O to yield *alkene* **S17** (10.4 g, 92%) as a yellow amorphous solid, *R<sub>f</sub>* 0.54 (1:1 hexane–Et<sub>2</sub>O);  $\nu_{\max}/\text{cm}^{-1}$  3110, 3055, 2974, 2850, 1663, 1512, 1466, 1337, 1284, 1046, 1027, 960, 758 and 744;  $\delta_{\text{H}}$  (400 MHz, CDCl<sub>3</sub>) 8.40 (1H, d, *J* 13.7, CHAr), 7.69 (1H, dd, *J* 7.8, 1.4, 6-Ar), 7.57 (1H, dd, *J* 7.6, 1.8, 3-Ar), 7.42–7.31 (2H, m, 4,5-Ar), 7.54 (1H, d, *J* 13.6, CHNO<sub>2</sub>);  $\delta_{\text{C}}$  (100 MHz, CDCl<sub>3</sub>) 139.0 (CHNO<sub>2</sub>), 137.7 (CHAr), 134.2 (Ar-6), 133.1 (Ar-4/5), 130.5 (*ipso*-2-Ar), 128.6 (Ar-4/5), 128.2 (Ar-3), 126.5 (*ipso*-1-Ar); Spectroscopic data are consistent with those reported in the literature.<sup>14</sup>

**2-(2-Bromophenyl)ethan-1-amine 10b**<sup>15</sup>

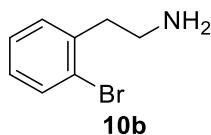

LiAlH<sub>4</sub> (33.3 mL of a 2.4M solution in THF, 80.0 mmol) was added dropwise to a solution of alkene **S17** (4.54 g, 20.0 mmol) in THF (120 mL) at 0 °C and the mixture was stirred at 0 °C for 5h. Then, water (15 mL), 20% NaOH (15 mL) and water (32 mL) were added in sequence. The resulting precipitate was filtered and washed

with Et<sub>2</sub>O (100 mL). The filtrate was then dried (MgSO<sub>4</sub>) and concentrated *in vacuo*. The crude product was purified by flash column chromatography, eluting with 90:10 EtOAc–MeOH to yield slightly impure *amine 10b* (1.40 g, ~35%) as a brown oil, *R<sub>f</sub>* 0.13 (9:1 EtOAc–MeOH);  $\nu_{\max}/\text{cm}^{-1}$  3057 (NH), 2930, 2855, 1566, 1470, 1439, 1023, 749 and 658;  $\delta_{\text{H}}$  (500 MHz, CDCl<sub>3</sub>) 7.54 (1H, d, *J* 8.6, 6-Ar), 7.25–7.22 (1H, m, 3,4-Ar), 7.10–7.05 (2H, m, 5-Ar), 3.00–2.96 (2H, m, CH<sub>2</sub>NH<sub>2</sub>), 2.92–2.88 (2H, m, CH<sub>2</sub>Ar), 1.78 (2H, br s, NH<sub>2</sub>);  $\delta_{\text{C}}$  (125 MHz, CDCl<sub>3</sub>) 139.2 (*ipso*-2-Ar), 133.1 (Ar-6), 131.2 (Ar-3/4), 128.1 (Ar-5), 127.6 (Ar-3/4), 124.8 (*ipso*-1-Ar), 42.2 (CH<sub>2</sub>NH<sub>2</sub>), 40.3 (CH<sub>2</sub>Ar); Spectroscopic data are consistent with those reported in the literature.<sup>15</sup>

### ***tert*-Butyl 3-((2-bromophenethyl)amino)piperidine-1-carboxylate **S18****

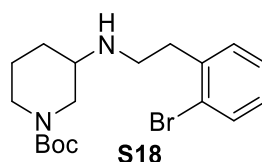

To a 7 mL vial were added [Ir(dF(Me)ppy)<sub>2</sub>(dtbbpy)PF<sub>6</sub>] (5.1 mg, 2 mol%), TRIP thiol (27 mg, 50 mol%), 2-(2-Bromophenyl)ethan-1-amine (99.5 mg, 0.5 mmol) and enecarbamate **5e** (45.8 mg, 0.25 mmol). Toluene (5 mL) was then added under N<sub>2</sub> and the resultant mixture was stirred for 16 h under irradiation with a blue LED and fan cooling. Reaction was performed in quadruplicate and the contents of the four vials combined before work-up. Then, the solvent was evaporated under reduced pressure to give a crude product. The crude product was purified by flash column chromatography eluting with EtOAc to yield *amine S18* as an undetermined mixture of rotamers (207 mg, 54%) as a yellow oil, *R<sub>f</sub>* 0.19 (EtOAc);  $\nu_{\max}/\text{cm}^{-1}$  2974, 2932, 2857, 1687 (C=O), 1421, 1365, 1239, 1174, 1151 and 752;  $\delta_{\text{H}}$  (500 MHz, CDCl<sub>3</sub>) 7.53 (1H, d, *J* 7.9, 3-Ar), 7.25–7.22 (2H, m, 5-Ar, 6-Ar), 7.14–7.10 (1H, m, 4-Ar), 4.23–3.82 (1H, br m, 2-H<sub>A</sub>), 3.79 (1H, app. d, *J* 13.1, 6-H<sub>A</sub>), 2.96–2.88 (4H, m, benzylamine CH<sub>2</sub>), 2.88–2.77 (1H, m, 6-H<sub>B</sub>), 2.77–2.49 (1H, br m, 2-H<sub>B</sub>, 3-H), 1.96–1.87 (1H, br m, 4-H<sub>A</sub>), 1.66 (1H, app. ddt, 12.4, 8.1, 3.9, 5-H<sub>A</sub>), 1.48–1.42 (11H, m, NH, 5-H<sub>A</sub>, C(Me)<sub>3</sub>), 1.31–

1.22 (1H, br m, 4-H<sub>B</sub>);  $\delta_{\text{C}}$  (125 MHz, CDCl<sub>3</sub>) 155.1 (C=O Boc), 139.4 (*ipso*-Ar-2), 133.0 (Ar-3), 130.9 (Ar-6), 128.1 (Ar-5), 127.6 (Ar-4), 124.7 (*ipso*-Ar-1), 79.6 (C(Me)<sub>3</sub>), 53.8 (C-3), 49.7 (C-2), 49.0 (C-2), 46.8 (benzyl NCH<sub>2</sub>), 44.6 (C-6), 43.9 (C-6), 37.1 (benzyl CH<sub>2</sub>Ar), 31.7 (C-4), 28.6 (C(Me)<sub>3</sub>), 24.0 (C-5), 23.5 (C-5) (19 out of 32 signals present); HRMS found MH<sup>+</sup>, 383.1335. C<sub>18</sub>H<sub>28</sub><sup>79</sup>BrN<sub>2</sub>O<sub>2</sub> requires 383.1329.

**tert-Butyl 3-(((benzyloxy)carbonyl)(2-bromophenethyl)amino)piperidine-1-carboxylate 11e**

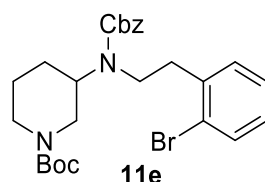

**11e** was synthesised using general method C using benzyl chloroformate (82  $\mu\text{L}$ , 0.576 mmol), amine **S18** (200 mg, 0.524 mmol) and NaHCO<sub>3</sub> (200 mg, 0.524 mmol) in DCM (5 mL) for 72 h. The crude product was purified by flash column chromatography, eluting with 75:25 hexane–EtOAc to yield *carbamate 11e* as 60:40 mixture of rotamers (263 mg, 87%) as a colourless oil,  $R_{\text{f}}$  0.64 (1:1 hexane-EtOAc);  $\nu_{\text{max}}/\text{cm}^{-1}$  2936, 2862, 1692 (C=O), 1471, 1416, 1365, 1265, 1242, 1170, 1150, 752 and 698;  $\delta_{\text{H}}$  (500 MHz, CDCl<sub>3</sub>) 7.58–7.46 (1H, br m, 3-Ar), 7.44–7.30 (5H, m, Ar, Ph), 7.25–6.94 (3H, m, Ar, Ph), 5.27–5.04 (2H, br m, CH<sub>2</sub> Cbz), 4.27–3.87 (2H, br m, 2-H<sub>A</sub>, 6-H<sub>A</sub>), 3.79 (1H, app. ddd,  $J$  15.3, 10.9, 4.2, 3-H), 3.49–3.29 (2H, br m, benzylamine NCH<sub>2</sub>), 3.08–2.90 (2H, br m, benzylamine CH<sub>2</sub>Ar), 2.89–2.80 (0.6H, m, 2-H<sub>B</sub>), 2.79–2.66 (0.4H, m, 2-H<sub>B</sub>), 2.64–2.40 (1H, br m, 6-H<sub>B</sub>), 1.85–1.64 (3H, br m, 4-H<sub>2</sub>, 5-H<sub>A</sub>), 1.57–1.32 (10H, br m, 4-H<sub>B</sub>, C(Me)<sub>3</sub>);  $\delta_{\text{C}}$  (125 MHz, CDCl<sub>3</sub>) 155.9, 154.9 (C=O Boc/Cbz), 138.5 (*ipso*-Ar-2), 136.7 (*ipso*-Ph), 132.9 (Ar-3), 131.2 (Ar-6), 128.7 (Ar), 128.4 (Ar), 128.3 (Ar), 127.8 (Ar), 124.6 (*ipso*-Ar-1), 79.9 (C(Me)<sub>3</sub>), 67.4 (CH<sub>2</sub> Cbz), 54.4 (C-3), 47.1 (C-2), 44.9 (benzyl NCH<sub>2</sub>), 43.3 (C-6), 37.2 (benzyl CH<sub>2</sub>Ar), 29.2 (C-4), 28.6 (C(Me)<sub>3</sub>), 25.1 (C-5) (21 out of 22 signals present); HRMS found MH<sup>+</sup>, 517.1714. C<sub>26</sub>H<sub>34</sub><sup>79</sup>BrN<sub>2</sub>O<sub>4</sub> requires 517.1696.

**Benzyl**                    **2,3,4,5,7,8-hexahydro-6H-1,5-methanobenzo[b][1,6]diazecine-6-carboxylate 7e**

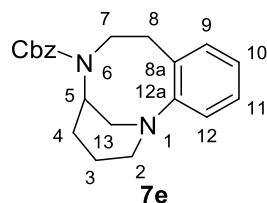

**7e** was synthesised using general method F using carbamate **11e** (110 mg, 0.213 mmol), HCl (2.3 mL, 6 N), EtOAc (0.4 mL), Pd<sub>2</sub>(dba)<sub>3</sub> (7.8 mg), BINAP (10.6 mg), NaOtBu (41.0 mg, 0.405 mmol) and toluene (4 mL). Heated at reflux for 96 h. The crude product was purified by flash column chromatography, eluting with 9:1 hexane–EtOAc to yield *carbamate 7e* as a 55:45 mixture of rotamers (1.3 mg, 2%) as an orange oil, *R<sub>f</sub>* 0.48 (7:3 hexane-EtOAc);  $\nu_{\max}/\text{cm}^{-1}$  2924, 2852, 1690 (C=O), 1497, 1455, 1420, 1226, 1174, 753 and 698;  $\delta_{\text{H}}$  (500 MHz, CDCl<sub>3</sub>) 7.34–7.24 (5H, br m, Ph), 7.05 (1H, td, *J* 7.7, 0.8, 11-H), 6.97 (0.55H, d, *J* 7.5, 9-H), 6.93 (0.45H, d, *J* 7.3, 9-H), 6.74 (1H, d, *J* 8.0, 12-H), 6.67 (0.55H, t, *J* 7.4, C-10), 6.66 (0.45H, t, *J* 7.4, C-10), 5.15–5.07 (2H, br m, Cbz CH<sub>2</sub>), 4.68 (0.55H, dd, *J* 14.8, 10.3, 7-H<sub>A</sub>), 4.42 (0.45H, dd, *J* 15.2, 10.2, 7-H<sub>A</sub>), 4.37–4.32 (0.45H, br m, 5-H), 4.20–4.16 (0.55H, br m, 5-H), 3.58–3.48 (2H, br m, 2-H<sub>A</sub>, 13-H<sub>A</sub>), 3.48–3.38 (1H, m, 7-H<sub>B</sub>), 3.38–3.21 (2H, m, 2-H<sub>B</sub>, 13-H<sub>B</sub>), 3.21–3.10 (1H, m, 8-H<sub>A</sub>), 2.82 (1H, app. dd, *J* 17.9, 6.1, 8-H<sub>B</sub>), 1.92–1.68 (3H, br m, 4-H<sub>2</sub>, 5-H<sub>A</sub>), 1.40–1.46 (1H, br m, 5-H<sub>B</sub>);  $\delta_{\text{C}}$  (125 MHz, CDCl<sub>3</sub>) 156.6 (C=O Cbz), 156.0 (C=O Cbz), 148.8 (C-12a), 148.7 (C-12a), 137.2 (*ipso*-Ph), 137.1 (*ipso*-Ph), 132.2 (C-9), 132.1 (C-9), 129.7 (C-8a), 129.3 (C-8a), 128.7 (Ph), 128.1 (Ph), 128.0 (Ph), 127.5 (C-11), 127.4 (C-11), 119.5 (C-12), 119.4 (C-12), 119.3 (C-10), 119.2 (C-10), 67.4 (Cbz CH<sub>2</sub>), 67.3 (Cbz CH<sub>2</sub>), 50.22, 50.18, 49.8 (C-2/13), 49.3 (C-5), 49.0 (C-5), 42.5 (C-7), 41.7 (C-7), 38.0 (C-8), 37.6 (C-8), 30.2 (C-4), 29.9 (C-4), 21.9 (C-5) (33 out of 38 signals present); HRMS found MNa<sup>+</sup>, 359.1727. C<sub>21</sub>H<sub>24</sub>N<sub>2</sub>O<sub>2</sub>Na requires 359.1730.

## 6. NMR, IR, Distortion Parameters and X-ray data<sup>6,16</sup>

Summary of C=O <sup>13</sup>C NMR and IR data for all bicyclic lactams:

| Entry | Lactam                                                                                          | <sup>13</sup> C NMR C=O δ (ppm) | IR C=O (cm <sup>-1</sup> ) |
|-------|-------------------------------------------------------------------------------------------------|---------------------------------|----------------------------|
| 1     | 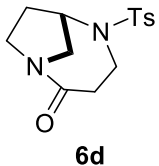<br>6d         | 183.1                           | 1682                       |
| 2     | <br>6c         | 182.1, 182.0                    | 1680                       |
| 3     | <br>(S,S)-6h | 181.4                           | 1684                       |
| 4     | <br>6f       | 180.2                           | 1686                       |
| 5     | <br>6g       | 179.9                           | 1691                       |

|    |           |                |      |
|----|-----------|----------------|------|
| 6  | <p>6e</p> | 179.9          | 1680 |
| 7  | <p>6i</p> | 179.7          | 1684 |
| 8  | <p>6k</p> | 176.8          | 1657 |
| 9  | <p>6l</p> | 172.80, 172.75 | 1647 |
| 10 | <p>6j</p> | 170.9          | 1667 |

### X-ray crystallographic data:

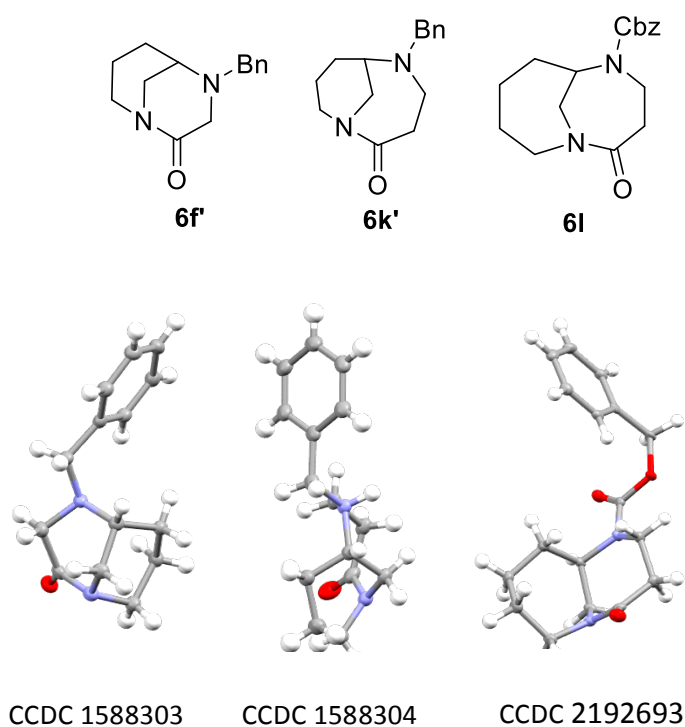

Crystallographic data for compounds **6f'** and **6k'** previously reported.<sup>6</sup>

Data for **6l** (CCDC 2192693):

|                                      |                                                               |
|--------------------------------------|---------------------------------------------------------------|
| Empirical formula                    | C <sub>17</sub> H <sub>22</sub> N <sub>2</sub> O <sub>3</sub> |
| Formula weight                       | 302.36                                                        |
| Temperature/K                        | 100.01(10)                                                    |
| Crystal system                       | monoclinic                                                    |
| Space group                          | P21/c                                                         |
| a/Å                                  | 12.1041(10)                                                   |
| b/Å                                  | 11.5162(9)                                                    |
| c/Å                                  | 10.8177(8)                                                    |
| α/°                                  | 90                                                            |
| β/°                                  | 95.407(7)                                                     |
| γ/°                                  | 90                                                            |
| Volume/Å <sup>3</sup>                | 1501.2(2)                                                     |
| Z                                    | 4                                                             |
| ρ <sub>calc</sub> /g/cm <sup>3</sup> | 1.338                                                         |
| μ/mm <sup>-1</sup>                   | 0.092                                                         |
| F(000)                               | 648                                                           |

|                                             |                                                               |
|---------------------------------------------|---------------------------------------------------------------|
| Crystal size/mm <sup>3</sup>                | 0.25 × 0.15 × 0.09                                            |
| Radiation                                   | Mo Kα (λ = 0.71073)                                           |
| 2θ range for data collection/°              | 5.178 to 59.002                                               |
| Index ranges                                | -16 ≤ h ≤ 12, -12 ≤ k ≤ 15, -14 ≤ l ≤ 14                      |
| Reflections collected                       | 8357                                                          |
| Independent reflections                     | 3554 [R <sub>int</sub> = 0.0392, R <sub>sigma</sub> = 0.0672] |
| Data/restraints/parameters                  | 3554/0/199                                                    |
| Goodness-of-fit on F <sup>2</sup>           | 1.087                                                         |
| Final R indexes [I ≥ 2σ (I)]                | R <sub>1</sub> = 0.0628, wR <sub>2</sub> = 0.1184             |
| Final R indexes [all data]                  | R <sub>1</sub> = 0.0913, wR <sub>2</sub> = 0.1305             |
| Largest diff. peak/hole / e Å <sup>-3</sup> | 0.29/-0.27                                                    |



| Entry                 | Distortion parameters (°) |            |            |            |          |          |        | Bond lengths (Å) |       | <sup>13</sup> C NMR (δ) | Sum of bond angles at N (°) |
|-----------------------|---------------------------|------------|------------|------------|----------|----------|--------|------------------|-------|-------------------------|-----------------------------|
|                       | $\omega_1$                | $\omega_2$ | $\omega_3$ | $\omega_4$ | $\chi_C$ | $\chi_N$ | $\tau$ | N-C(O)           | C=O   |                         |                             |
| <b>6f<sup>a</sup></b> | 0.06                      | 46.86      | 173.98     | -127.06    | 6.08     | 52.88    | 23.5   | 1.380            | 1.233 | 182.9                   | 333.7                       |
| <b>6k<sup>a</sup></b> | 8.61                      | -26.54     | -168.55    | 150.62     | 2.84     | 37.99    | 8.9    | 1.361            | 1.218 | 179.6                   | 348.8                       |
| <b>6l</b>             | -4.22                     | 11.36      | 173.82     | -166.68    | 1.96     | 17.54    | 3.57   | 1.355            | 1.233 | 172.80,<br>172.75       | 357.8                       |

<sup>a</sup>Compounds and associated data published previously.<sup>6</sup>

## 7. $pK_a$ Determinations of Bicyclic Anilines

### Experimental details:

Non-aqueous (DMSO)  $pK_a$  determinations were performed using the method published by Iggo *et al.*<sup>17</sup>

Experiments were performed in Norell Sample Vault NMR tubes on a Bruker AV-I 400 spectrometer operating at 400.053 MHz for  $^1\text{H}$ . CSI experiments were carried out using the gradient phase encoding sequence of Schenck *et al.*<sup>17</sup> This is based on the sequences of Trigo-Mourino *et al.*<sup>18</sup> and Wallace *et al.*<sup>19</sup>

The phase encoding gradient pulse  $g$  was 267.52220  $\mu\text{s}$  and varied from -27 to 27  $\text{Gcm}^{-1}$  in 128 slices. Typically, 16 dummy scans preceded signal acquisition, with 8 scans acquired for each gradient increment, with an acquisition time of 1.278 s. A spoil gradient of 27  $\text{Gcm}^{-1}$  was included after the acquisition period to destroy any remaining transverse magnetisation. Time domain data files were transformed without zero-filling using sine bell apodization. A 128 slice CSI experiment had a total acquisition time of 32 minutes with a theoretical spatial resolution of 0.15 mm.

All indicator 0.6 mol/L stock solutions were prepared with dry DMSO- $d_6$  as 2 mL stock solutions in a  $\text{N}_2$  purged glovebox. Volatile reagents deleterious to the glovebox were added in air. A 33 mmol / L stock solution of hexamethyldisilane in dry DMSO- $d_6$  was prepared to act as a pH independent internal chemical shift reference.

Benzyl 3,4-dihydro-2H-1,4-methanobenzo[b][1,5]diazocine-5(6H)-carboxylate **7a**:

The analyte was dissolved in 1144  $\mu\text{L}$  of dry DMSO- $d_6$ . The following volumes of stock solutions were then added: 15  $\mu\text{L}$  of pyridine solution; 15  $\mu\text{L}$  of 2,6-lutidine solution; 10  $\mu\text{L}$  of 1-methylimidazole solution; 10  $\mu\text{L}$  of *N,N*-dimethylbenzylamine solution and 6  $\mu\text{L}$  of HMDS solution. The resulting concentrations of analyte and indicators in the measured sample were: Analyte **7a** 5.40 mmol / L; pyridine = 7.5

mmol / L; 2,6-lutidine = 7.5 mmol / L; 1-methylimidazole = 5 mmol / L; *N,N*-dimethylbenzylamine = 5 mmol / L; HMDS = 165  $\mu$ mol / L.

Benzyl 2,3,4,5-tetrahydro-1,5-methanobenzo[b][1,5]diazonine-6(7H)-carboxylate **7b**:

The analyte was dissolved in 1140  $\mu$ L of anhydrous DMSO- $d_6$ . The following volumes of stock solutions were then added: 15  $\mu$ L of *N,N*-dimethylaniline solution; 15  $\mu$ L of pyridine solution; 10  $\mu$ L of 2,6-lutidine solution; 10  $\mu$ L of 1-methylimidazole solution and 10  $\mu$ L of HMDS solution. The resulting concentrations of analyte and indicators in the measured sample were: Analyte **7b**= 5.17 mmol / L; *N,N*-dimethylaniline = 7.5 mmol / L; pyridine = 7.5 mmol / L; 2,6-lutidine = 7.5 mmol / L; 1-methylimidazole = 5 mmol / L; HMDS = 275  $\mu$ mol / L.

Benzyl 3,4,5,6-tetrahydro-2H-1,6-methanobenzo[b][1,5]diazecine-7(8H)-carboxylate **7d**:

The analyte was dissolved in 1140  $\mu$ L of anhydrous DMSO- $d_6$ . The following volumes of stock solutions were then added: 15  $\mu$ L of *N,N*-dimethylaniline solution; 15  $\mu$ L of pyridine solution; 10  $\mu$ L of 2,6-lutidine solution; 10  $\mu$ L of 1-methylimidazole solution and 10  $\mu$ L of HMDS solution. The resulting concentrations of analyte and indicators in the measured sample were: Analyte **7d**= 5.20 mmol / L; *N,N*-dimethylaniline = 7.5 mmol / L; pyridine = 7.5 mmol / L; 2,6-lutidine = 7.5 mmol / L; 1-methylimidazole = 5 mmol / L; HMDS = 275  $\mu$ mol / L.

To establish a pH gradient, solid acid was weighed directly into the NMR tube using a Mettler AE101 balance with a stated precision of  $\pm$  0.01 mg. Four 2 mm glass beads were placed on top of the solid acid in the NMR tube to prevent rapid mixing. 550  $\mu$ L of basic solution was then gently layered on top of the glass beads and the tube left to stand vertically at ambient laboratory temperature (20°C) until analysis. Basic analytes were investigated by titrating a solid acid of known  $pK_a$  (*p*-toluenesulfonic acid) against a solution containing the analyte and several basic

indicators as specified. Limiting shifts of indicators were determined independently from the imaging experiments. An excess of strong acid or base was used to measure limiting shifts of all reagents.

Water content across the samples was assessed by NMR and established to be below 1.0 v% and as such low it would not have an impact on  $pK_a$  value.<sup>17</sup>

### Electronic Structure and $pK_a$ Calculations

Geometries of **7a**, **7b** and **7d** were optimised using Density-Functional Theory (DFT). A conformational search was performed, and only conformers with the lowest energy were used for further calculations. M06-2x functional and 6-31G\*\* basis set were used within the Schrodinger optimisation tool.<sup>21,22,23</sup> The tool performed quantum mechanical Hessian matrix analysis to avoid convergence at a local minimum. Pseudospectral methods were turned off. Geometries were optimised in the gas phase and also in the parallel runs in both DMSO and water using Poisson Boltzmann Finite (PBF) solvation model.

Jaguar Prediction Method was used to calculate  $pK_a$  in water of **7a**, **7b** and **7d**.<sup>20,21,22,23,24</sup> It calculates a reference value from the gas and water-solvated phase energies. The conformational search was performed, and only conformers with the lowest energy were used for further calculations. Gas phase and water-solvated geometries were optimised using B3LYP/6-31G\* density functional theory (DFT). Pseudospectral methods were turned off. Energies of each optimised geometry were obtained using single spot B3LYP/cc-pVTZ(+) DFT calculations. The solvation-free energy of the protonated and deprotonated species with empirical parameterisation being applied. The results were collected, and raw  $pK_a$  was calculated. The final  $pK_a$  is obtained after applying empirical corrections.<sup>20,21,22,23,24</sup>

## Results:

Benzyl 3,4-dihydro-2H-1,4-methanobenzo[b][1,5]diazocine-5(6H)-carboxylate **7a**:

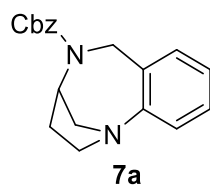

Basic indicators: pyridine ( $pK_a = 3.4$ ), 2,6-lutidine ( $pK_a = 4.46$ ), 1-methylimidazole ( $pK_a = 6.15$ ), *N,N*-dimethylbenzylamine ( $pK_a = 7.60$ ).

Titration curve:

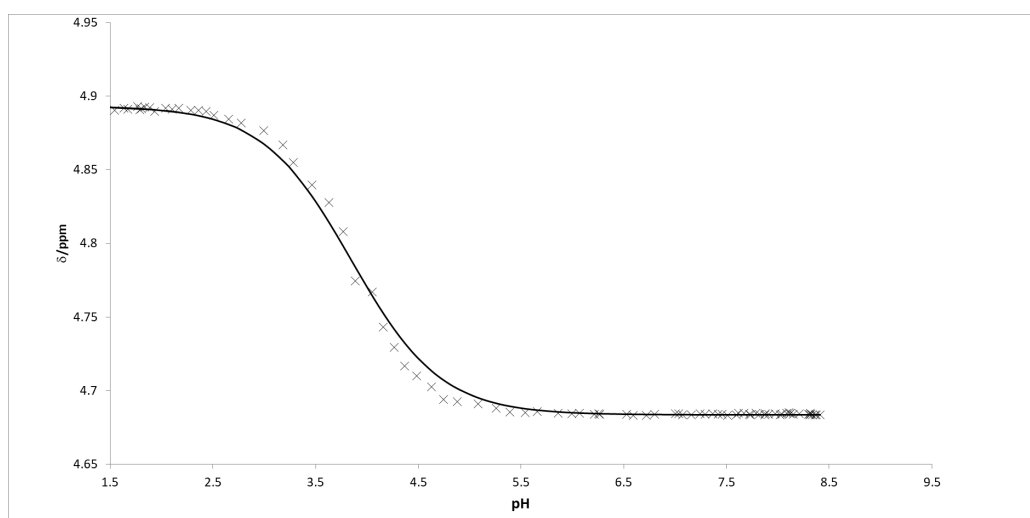

83 data points

$$R^2 = 0.999999504$$

$$pK_{a(\text{dmsO})} = 3.85 (+/-0.1)$$

Geometry optimised in gas phase for **7a**:

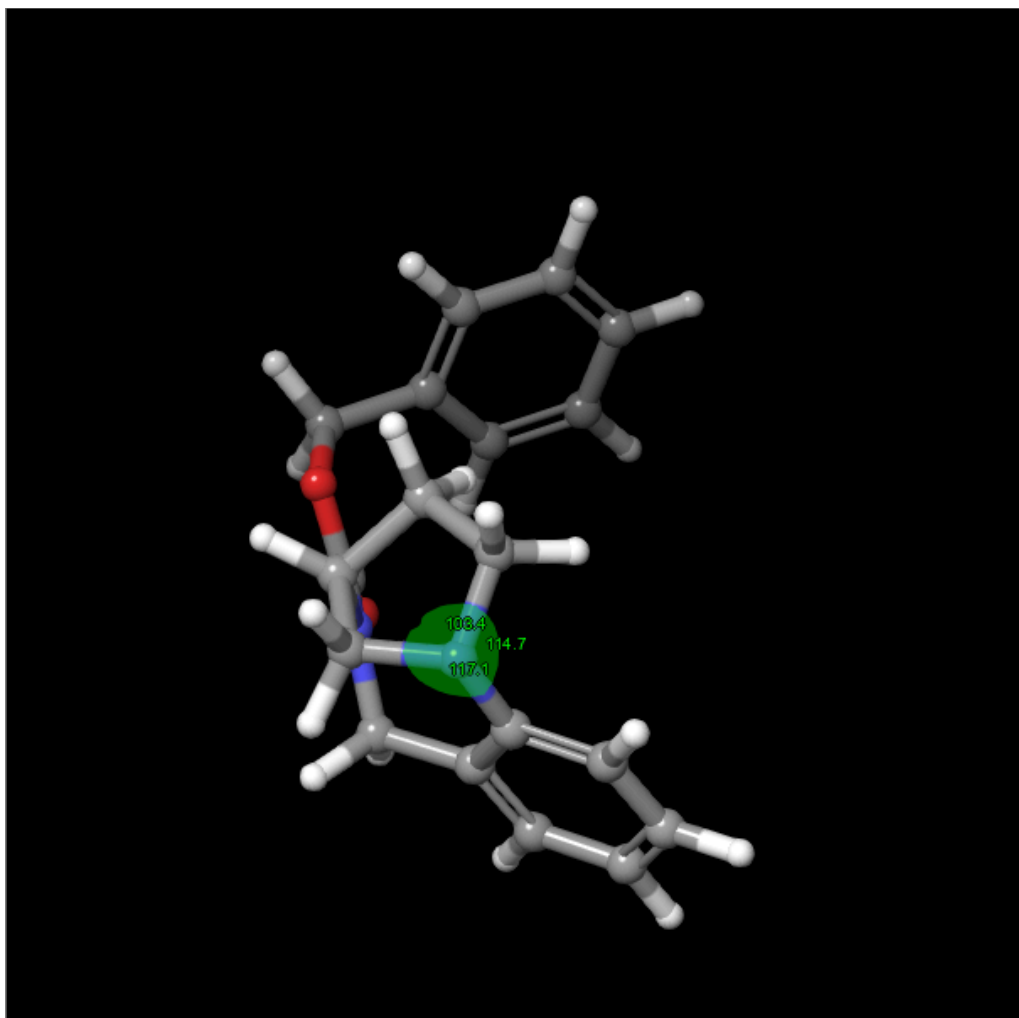

Sum of bond angles at nitrogen:  $\Sigma_{\text{angles}} = 335.2$

Electrostatic potential map in gas phase for **7a**:

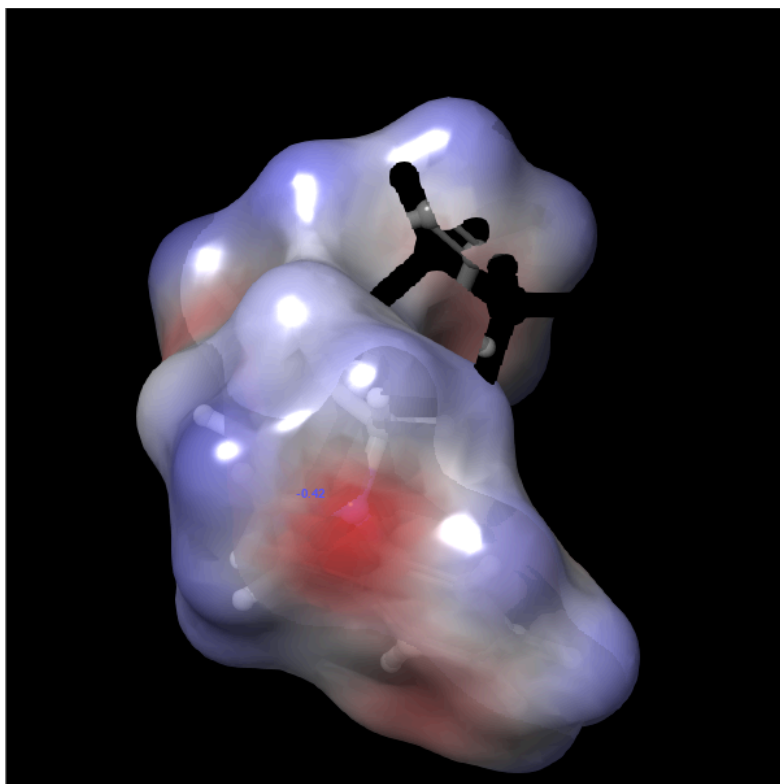

Convergence parameters in gas phase for **7a**:

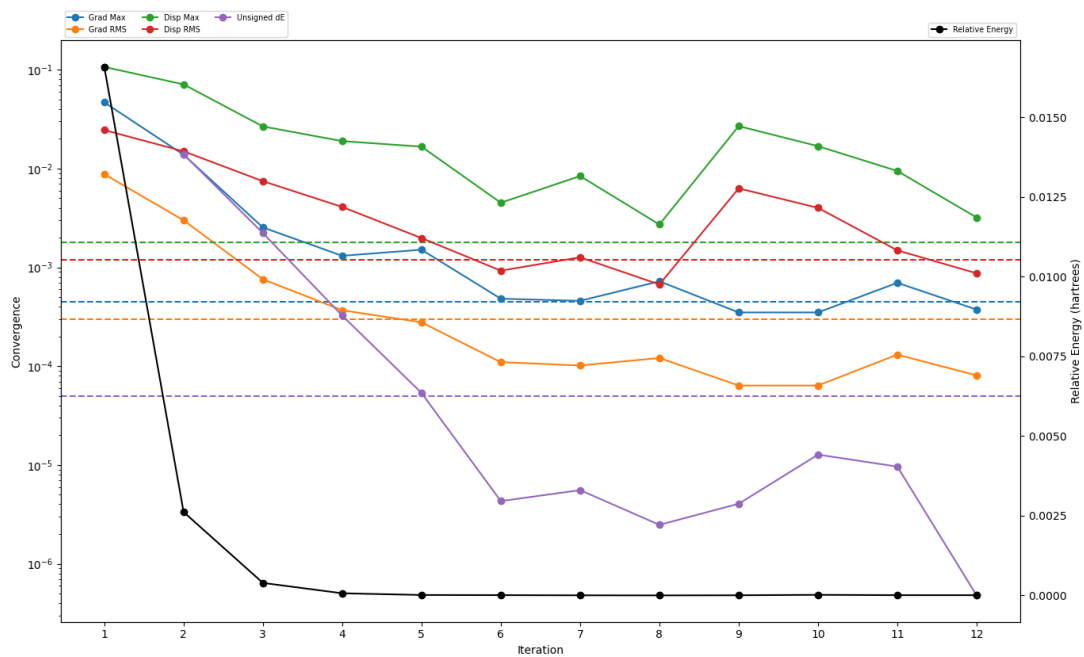

Geometry optimised in DMSO for **7a**:

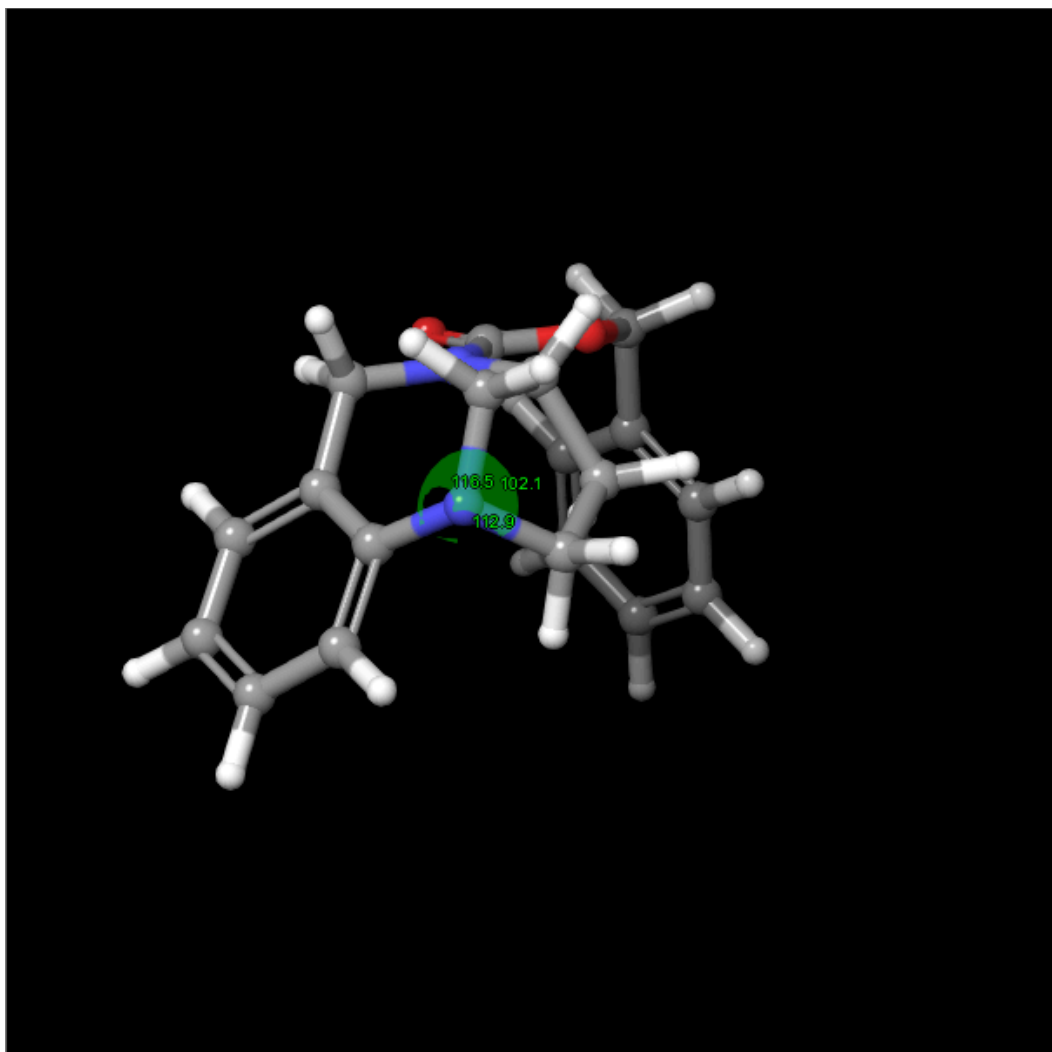

Sum of bond angles at nitrogen:  $\Sigma_{\text{angles}} = 331.5^\circ$



Electrostatic potential map in DMSO for **7a**:

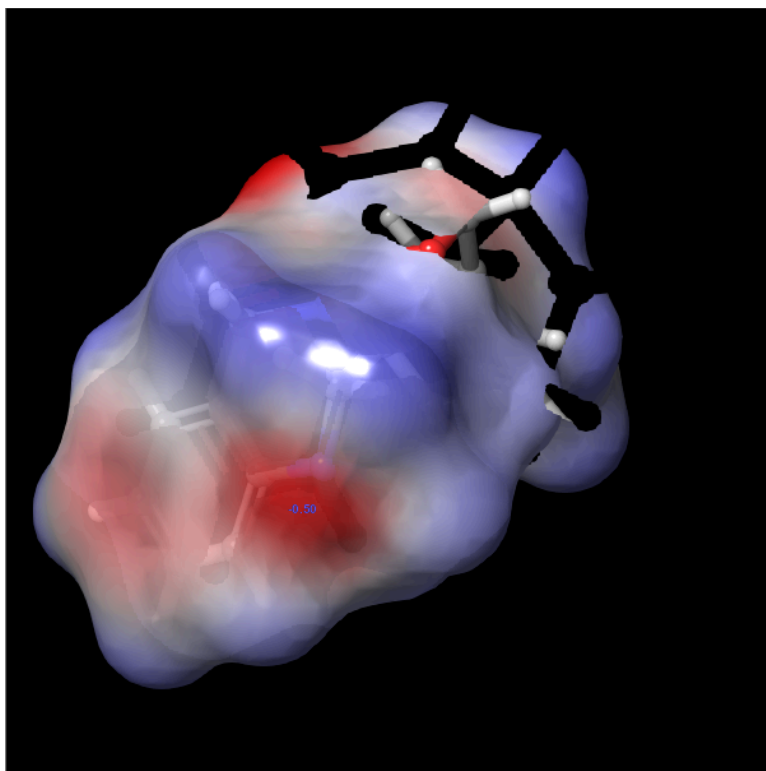

Convergence parameters in DMSO for **7a**:

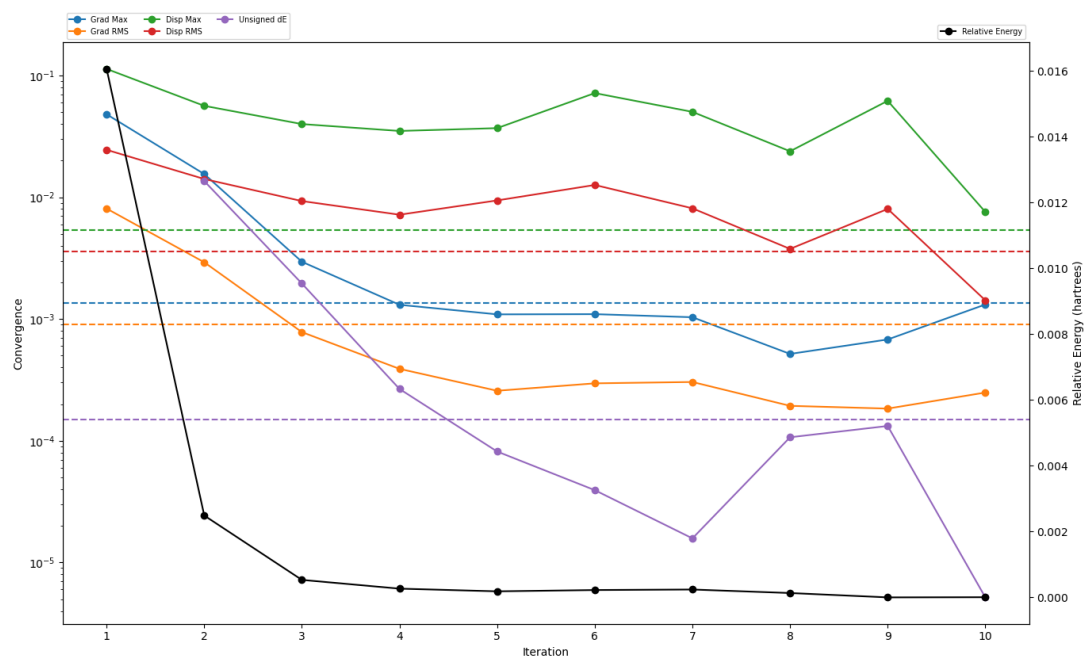

Geometry optimised in water for **7a**:

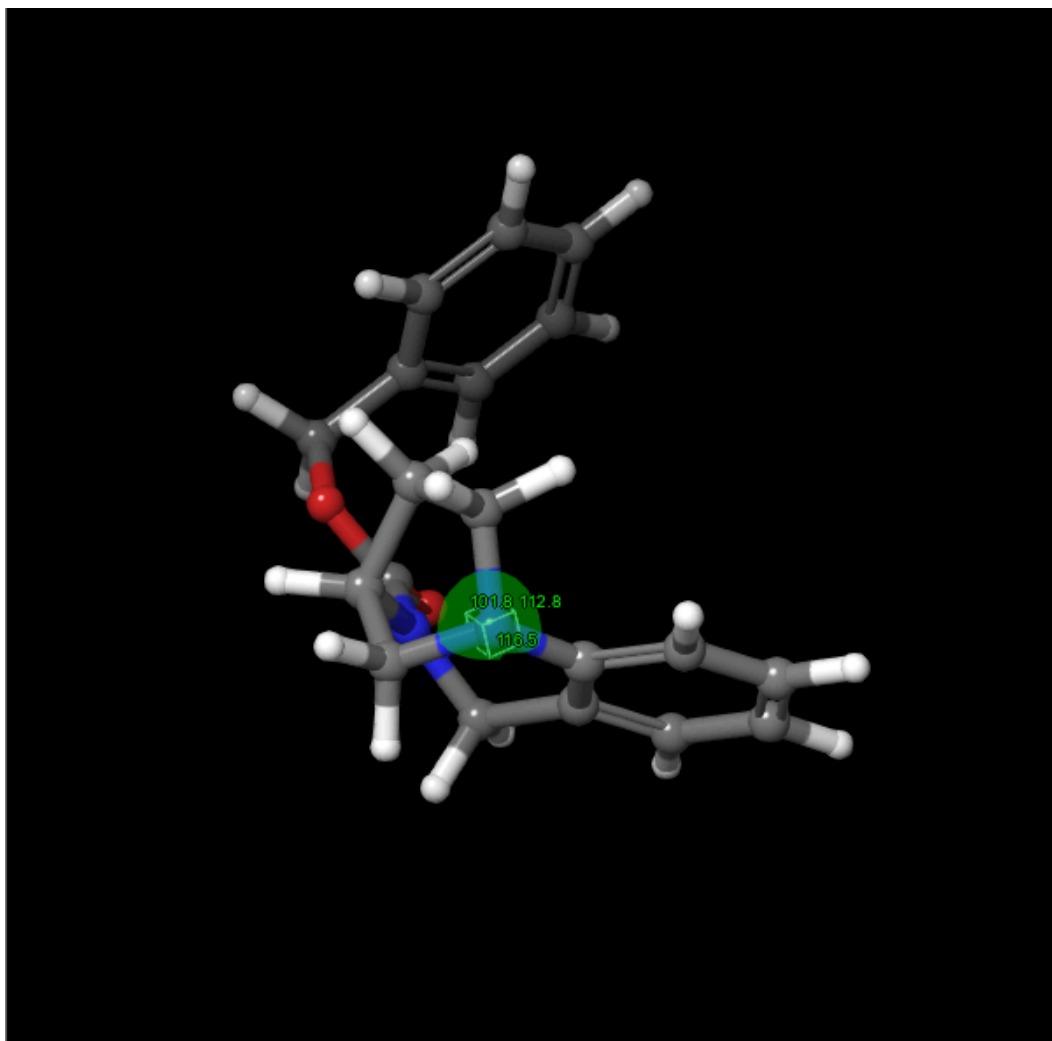

Sum of bond angles at nitrogen:  $\Sigma_{\text{angles}} = 331.1$

Electrostatic potential map in water for **7a**:

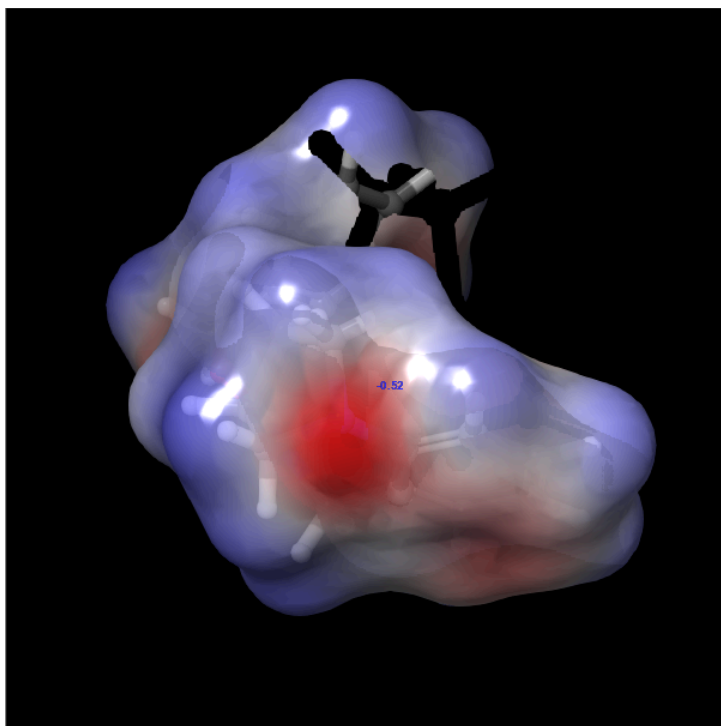

Convergence parameters in water for **7a**:

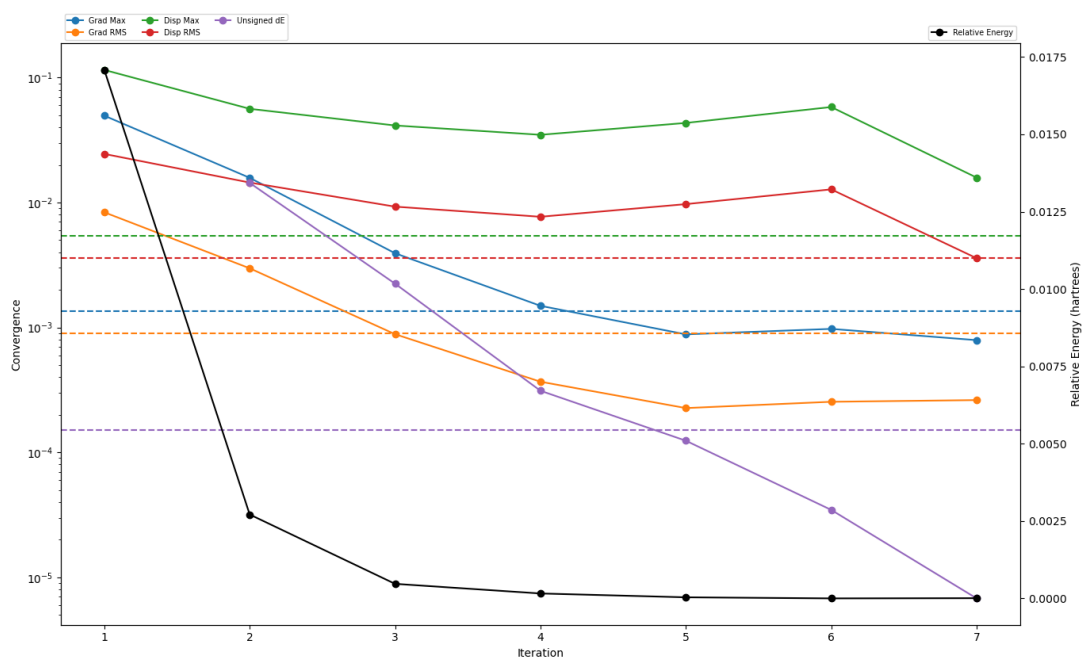

$pK_a(\text{water JPM}) = 5.64 (\pm 0.5)$

Benzyl 2,3,4,5-tetrahydro-1,5-methanobenzo[b][1,5]diazonine-6(7H)-carboxylate

**7b:**

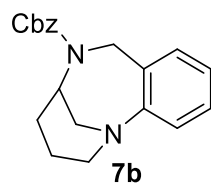

Basic indicators: pyridine ( $pK_a = 3.4$ ), *N,N*-dimethylaniline ( $pK_a = 2.51$ ).

Titration curve:

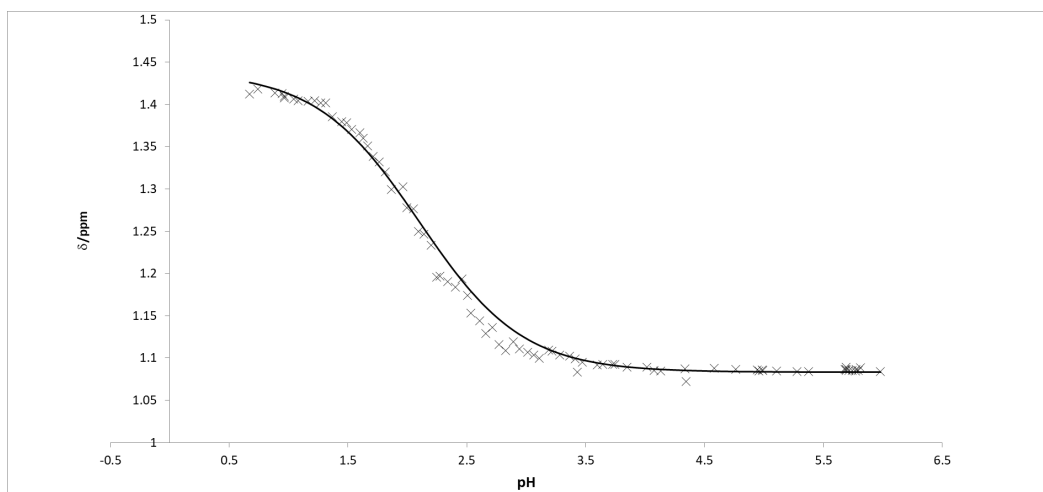

79 data points

$R^2 = 0.999955198$

$pK_a = 2.10 (+/-0.1)$

Geometry optimised in gas phase for **7b**:

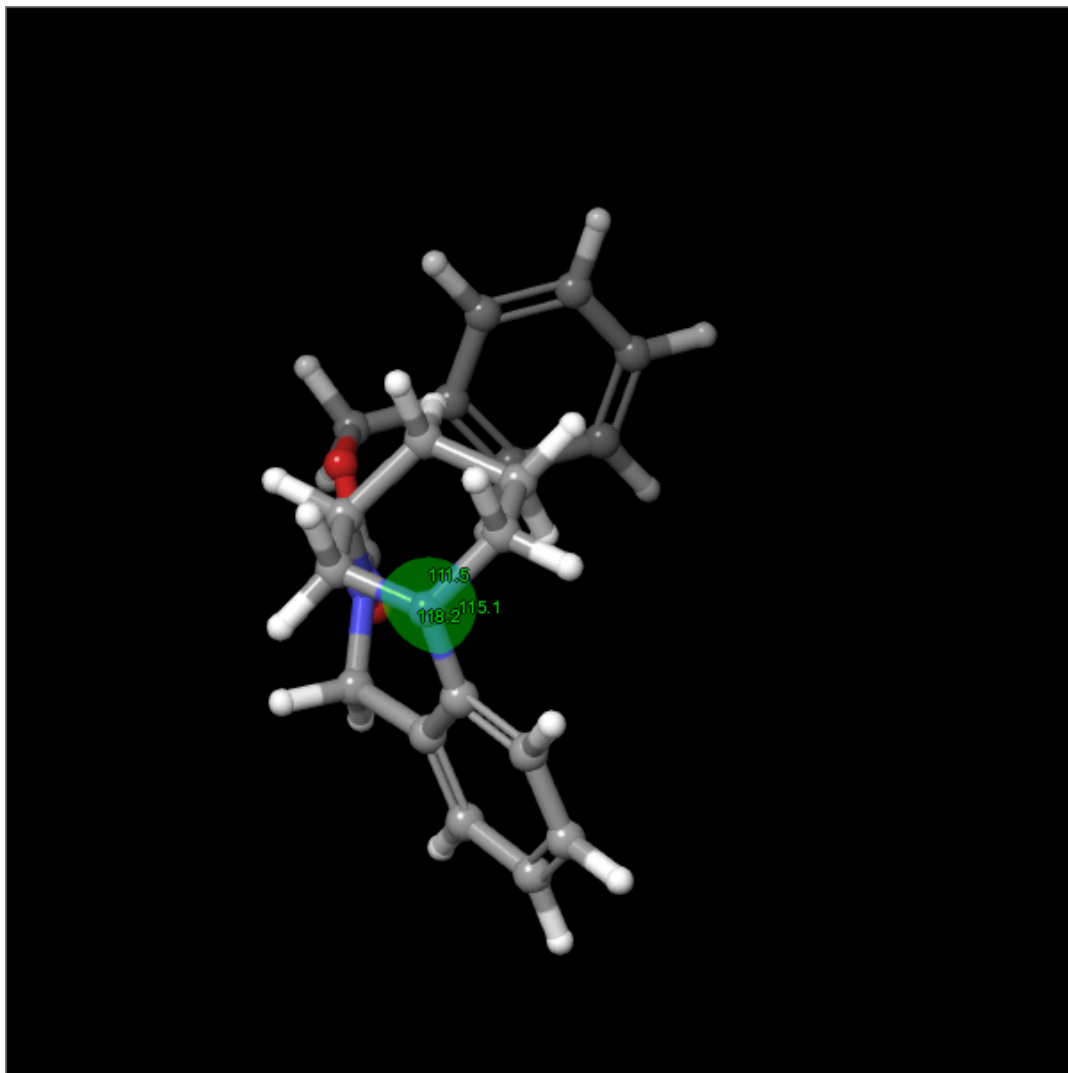

Sum of bond angles at nitrogen:  $\Sigma_{\text{angles}} = 344.8$

Electrostatic potential map in gas phase for **7b**:

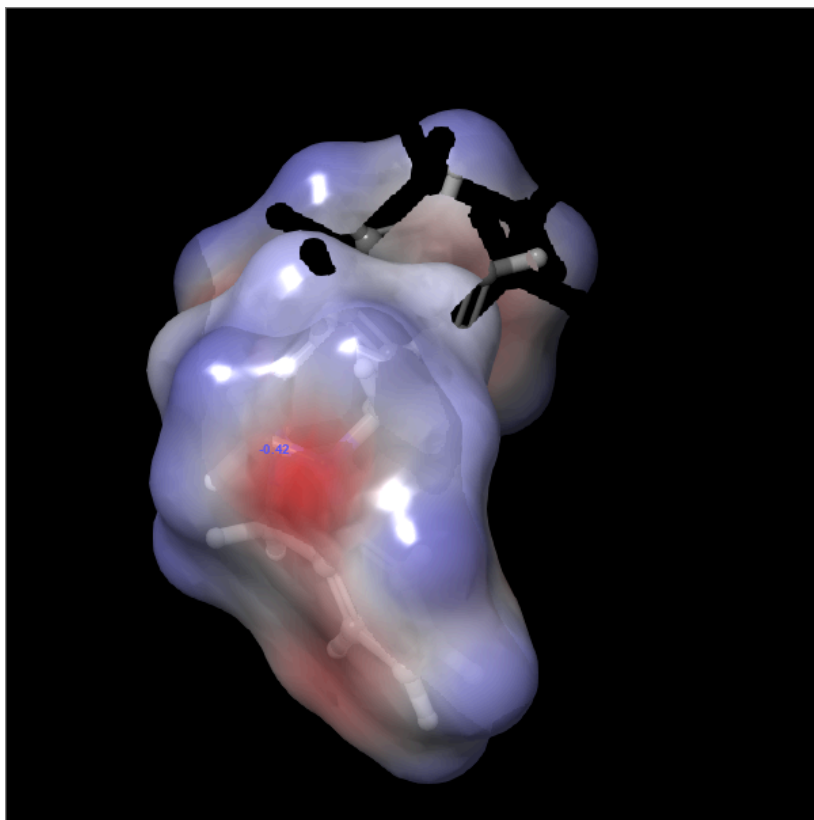

Convergence parameters in gas phase for **7b**:

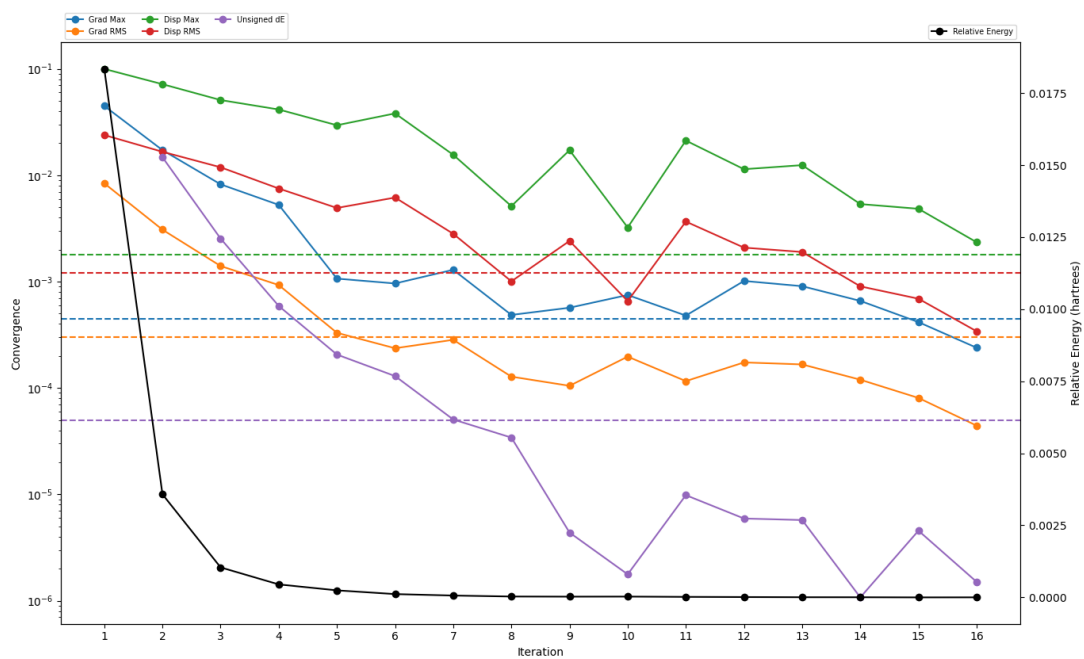

Geometry optimised in DMSO for **7b**:

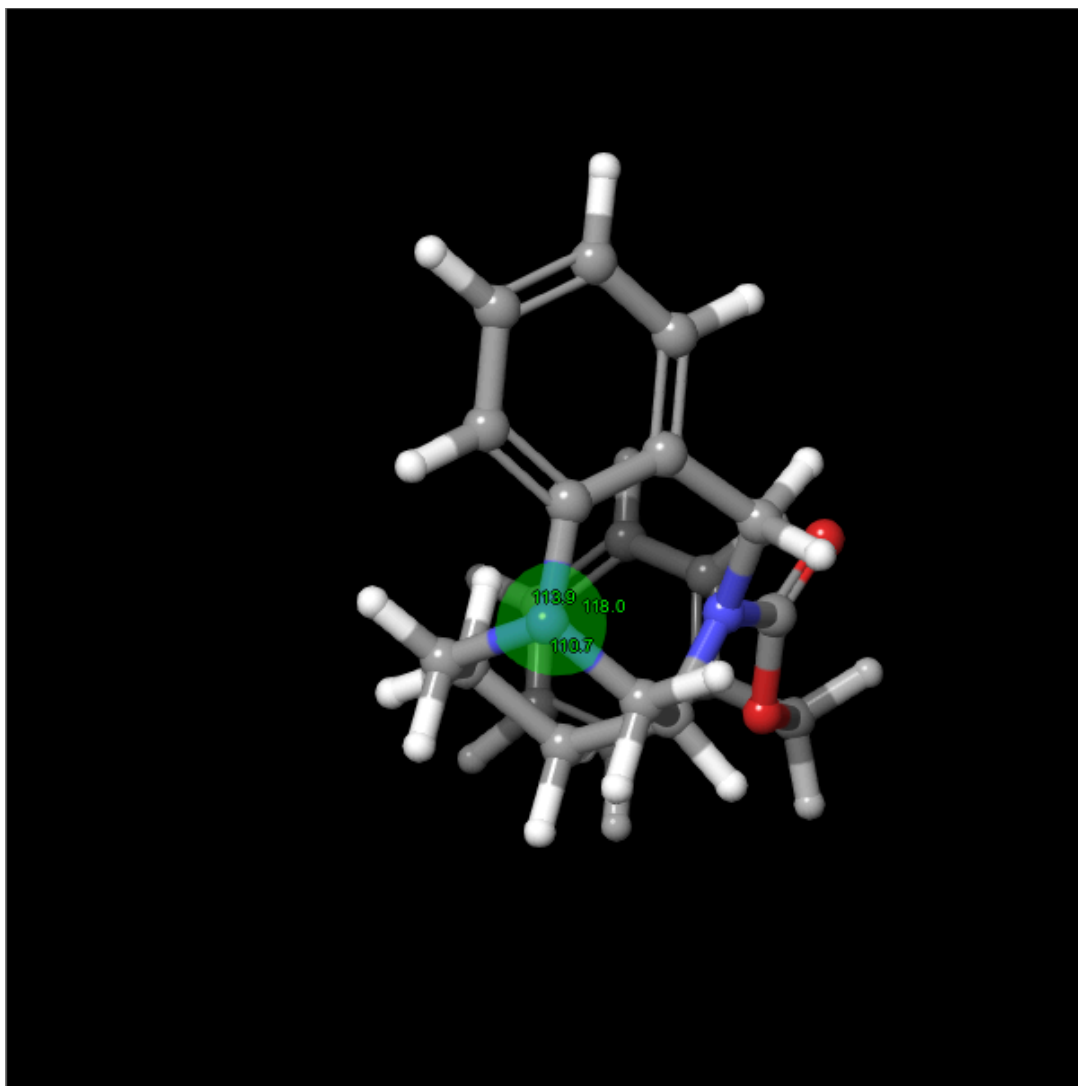

Sum of bond angles at nitrogen:  $\Sigma_{\text{angles}} = 342.6$

Electrostatic potential map in DMSO for **7b**:

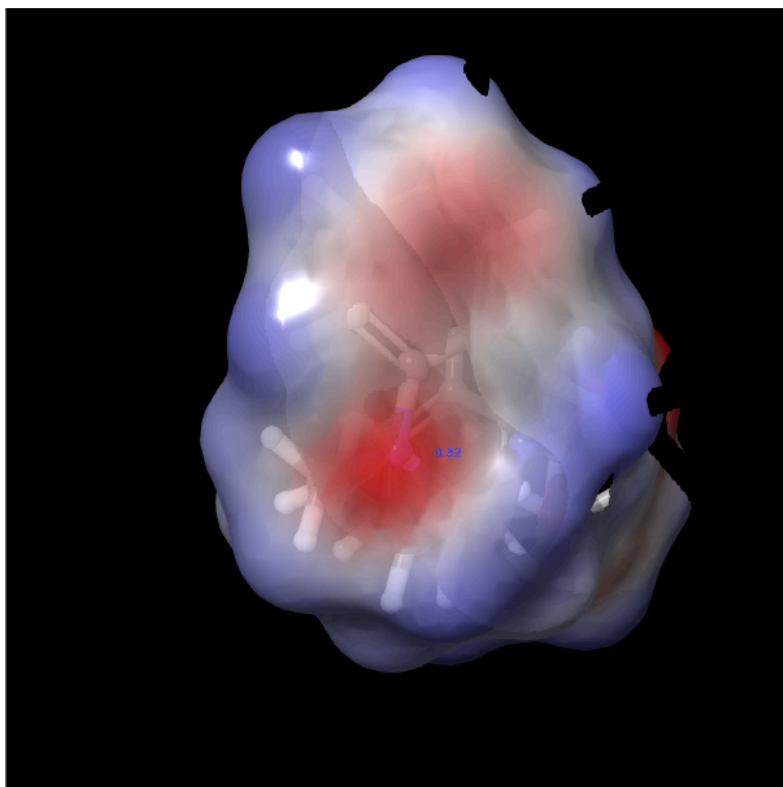

Convergence parameters in DMSO for **7b**:

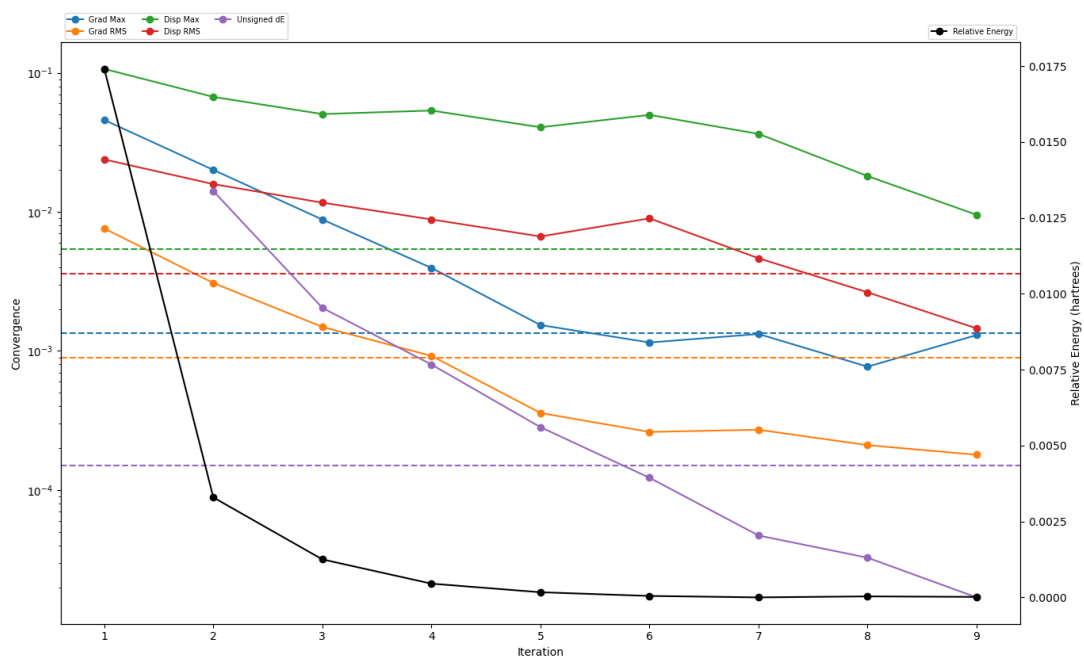



Geometry optimised in water for **7b**:

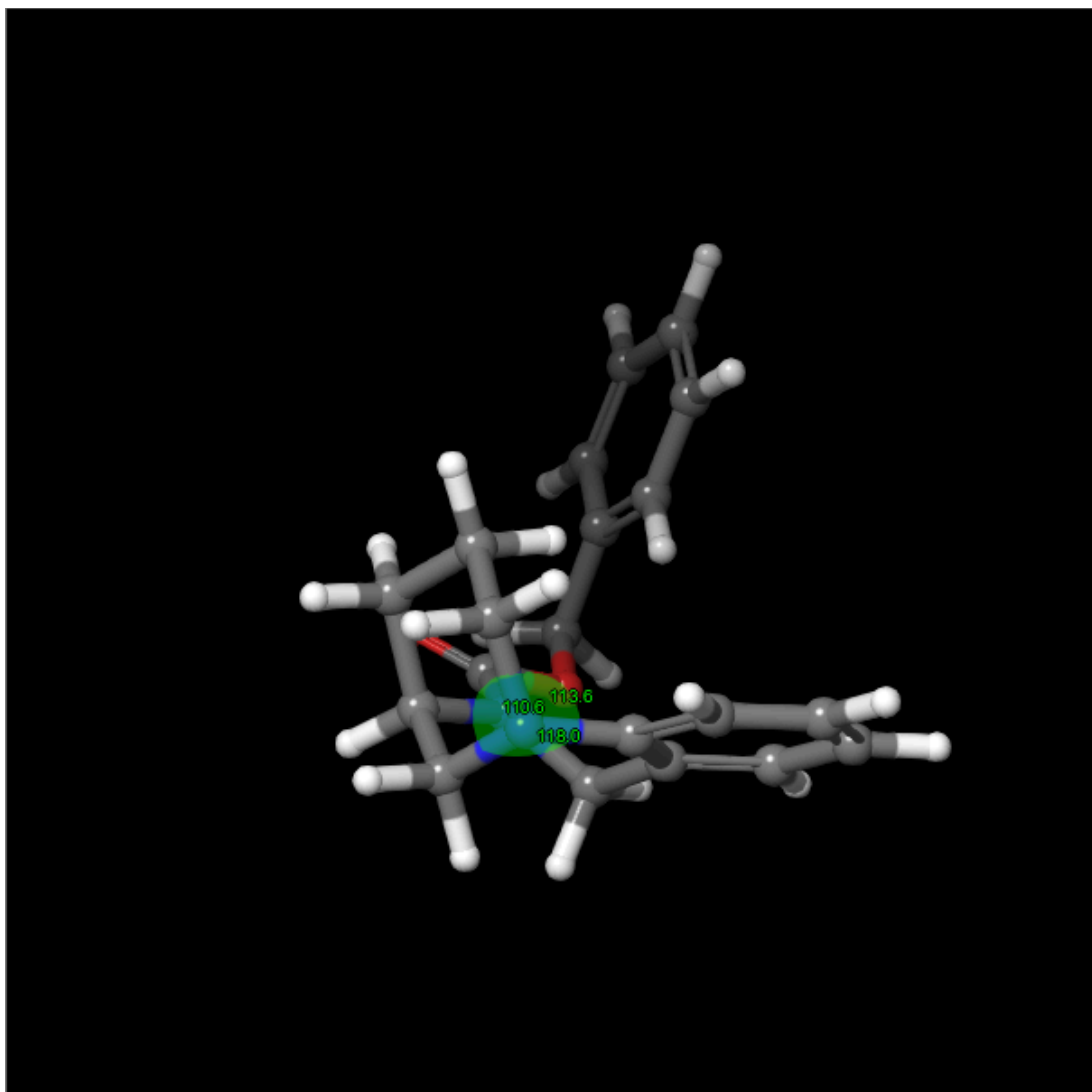

Sum of bond angles at nitrogen:  $\Sigma_{\text{angles}} = 342.2^\circ$

Electrostatic potential map in water for **7b**:

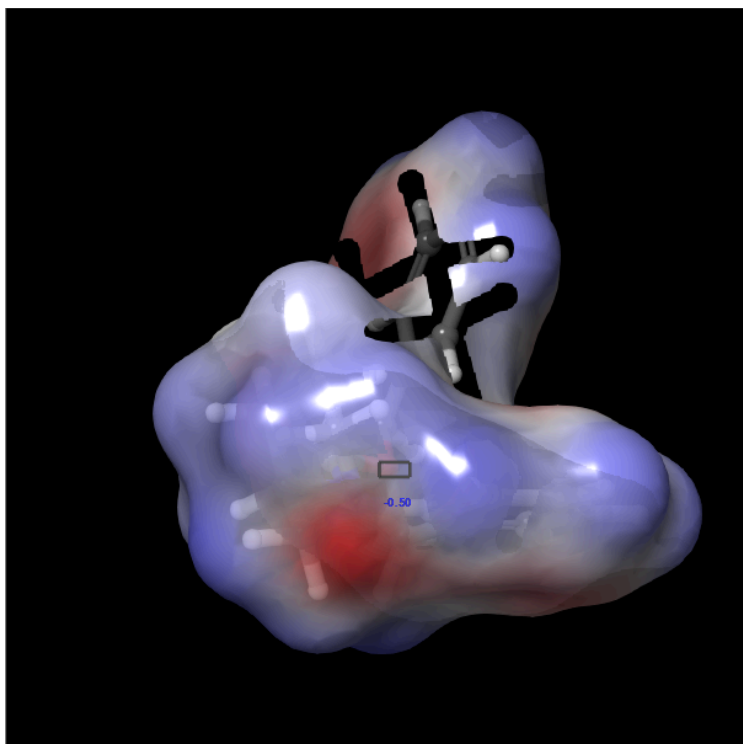

Convergence parameters in water for **7b**:

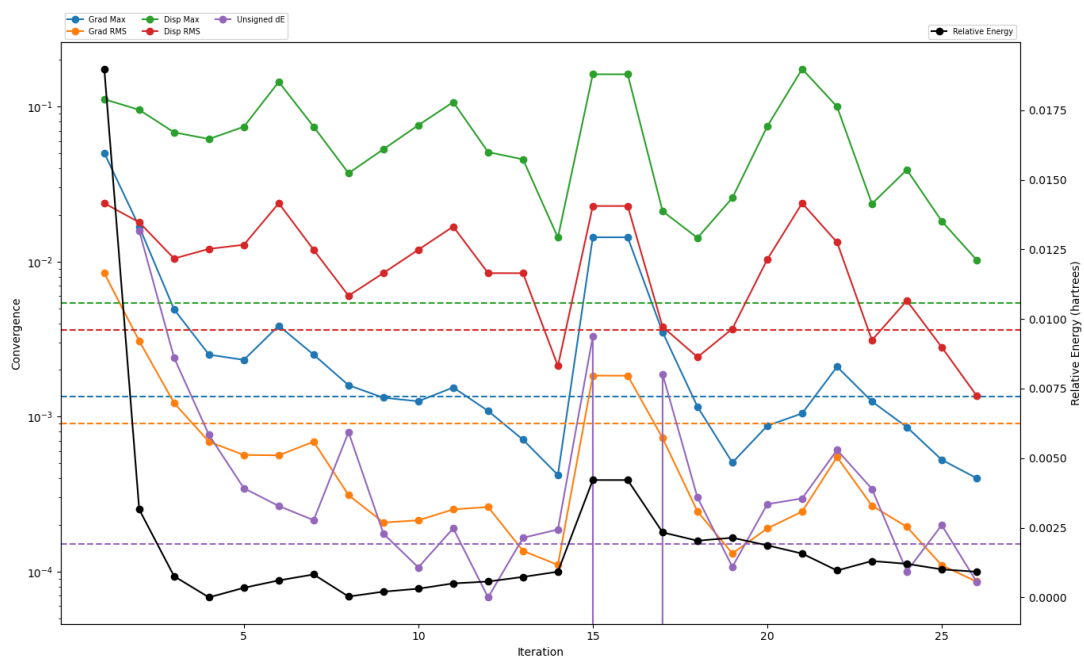

$pK_a$  (water JPM) = 3.56 (+/-0.5)

Benzyl 3,4,5,6-tetrahydro-2H-1,6-methanobenzo[b][1,5]diazecine-7(8H)-carboxylate **7d**:

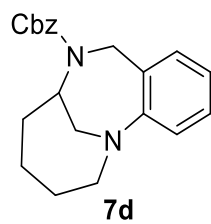

Basic indicators: pyridine ( $pK_a = 3.4$ ), 2,6-lutidine ( $pK_a = 4.46$ ), 1-methylimidazole ( $pK_a = 6.15$ ), *N,N*-dimethylaniline ( $pK_a = 2.51$ ).

Titration curve:

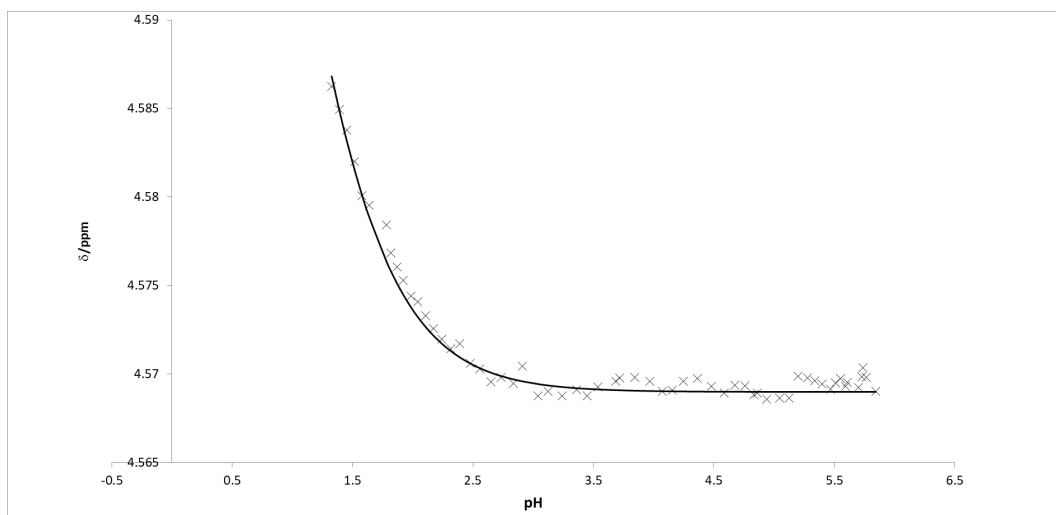

59 data points

$R^2 = 0.999999641$

$pK_a = 0.81 (+/-0.1)$

Optimised Geometry in gas phase for **7d**:

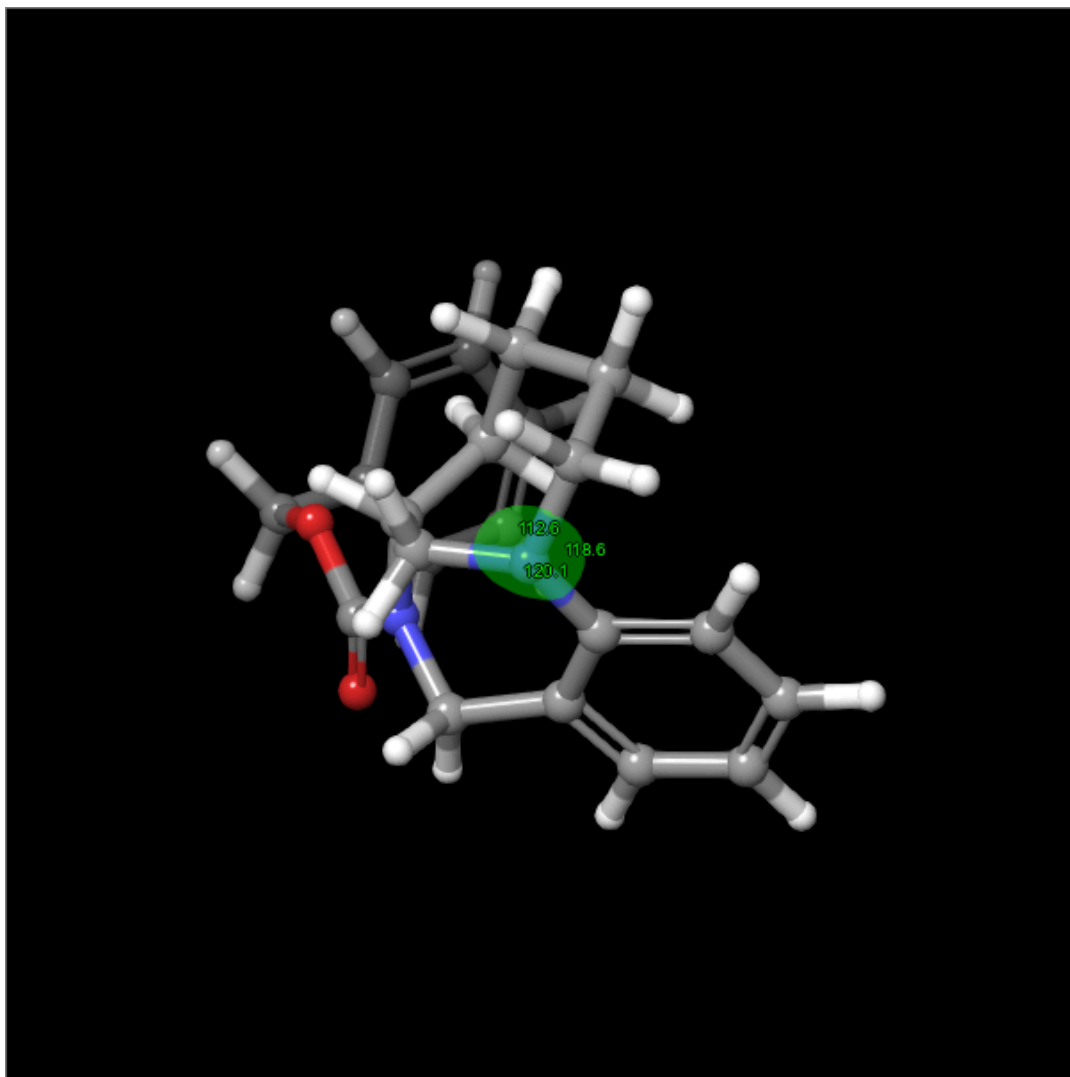

Sum of bond angles at nitrogen:  $\Sigma_{\text{angles}} = 351.3^\circ$

Electrostatic potential map in gas phase for **7d**:

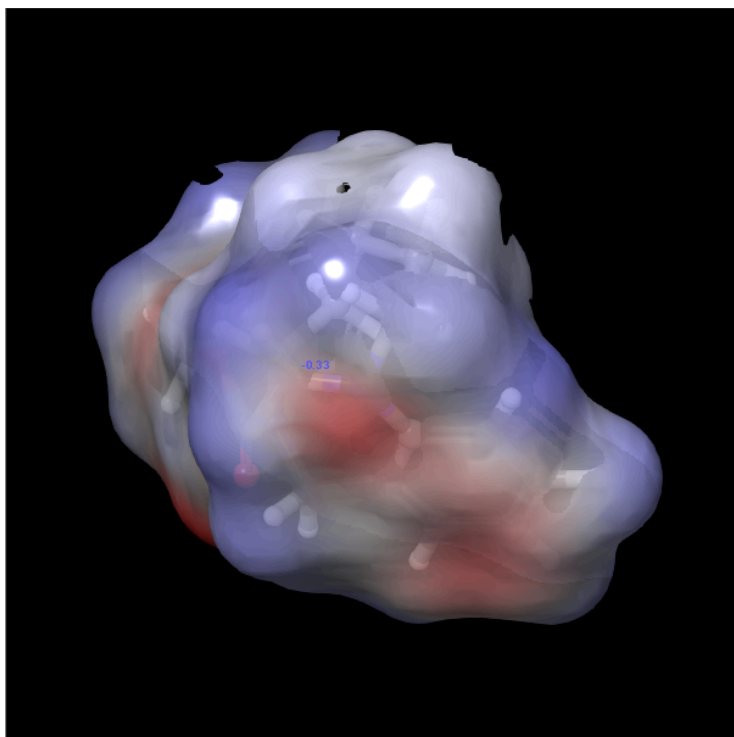

Convergence parameters in gas phase for **7d**:

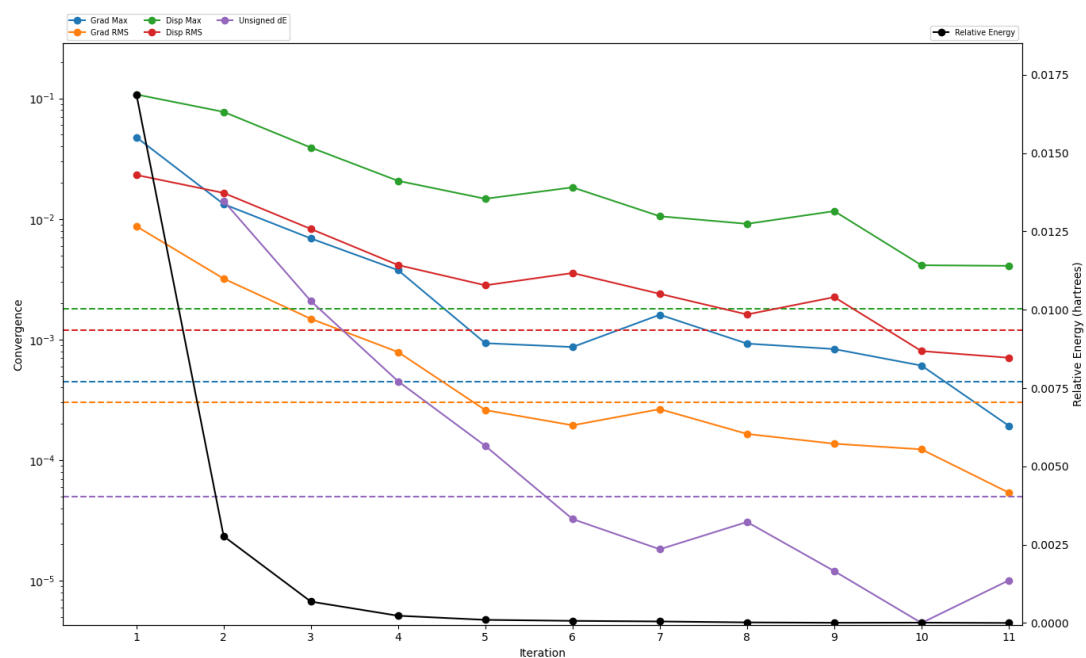

Optimised Geometry in DMSO for **7d**:

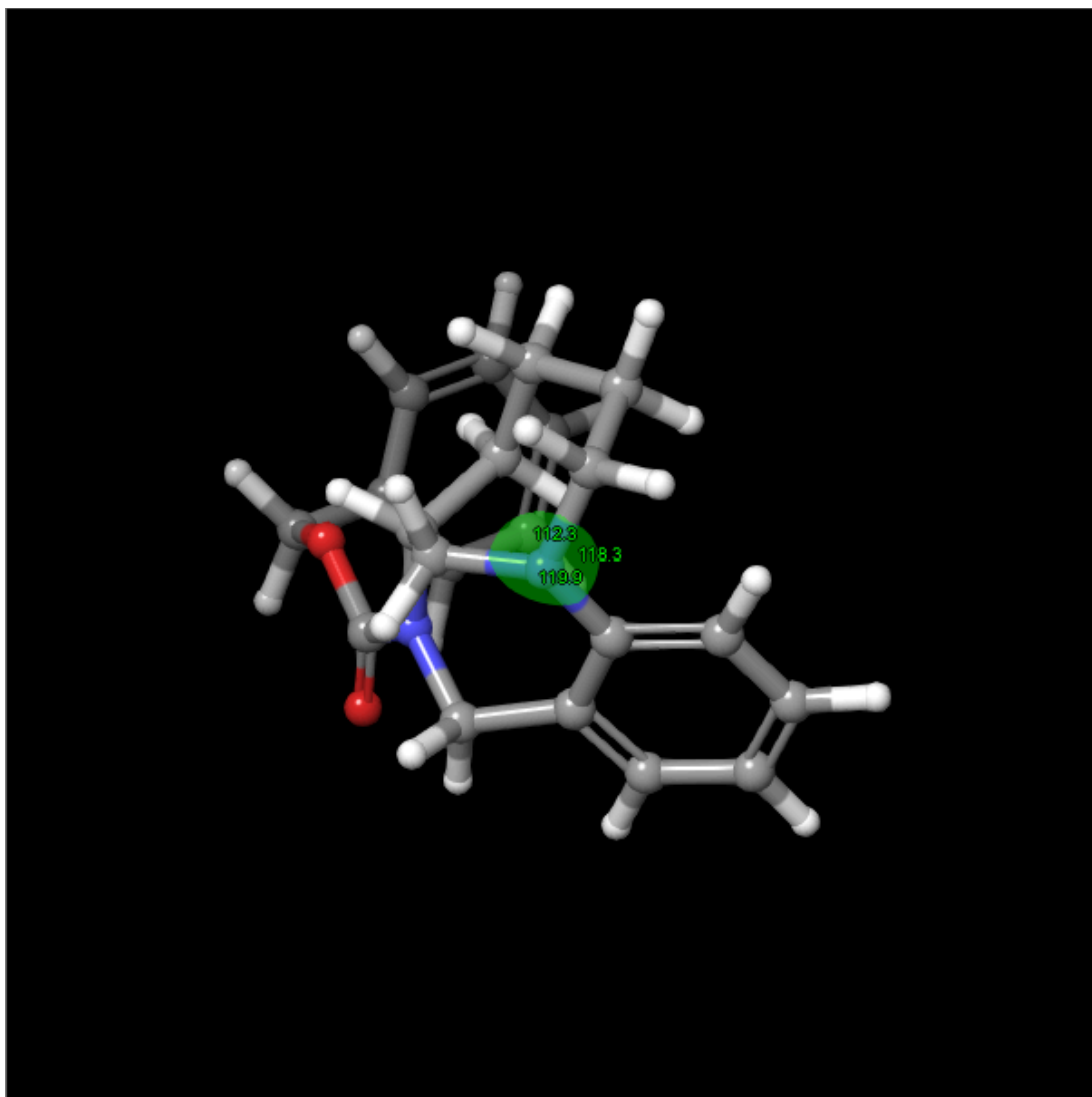

Sum of bond angles at nitrogen:  $\Sigma_{\text{angles}} = 350.5^\circ$

Electrostatic potential map in DMSO for **7d**:

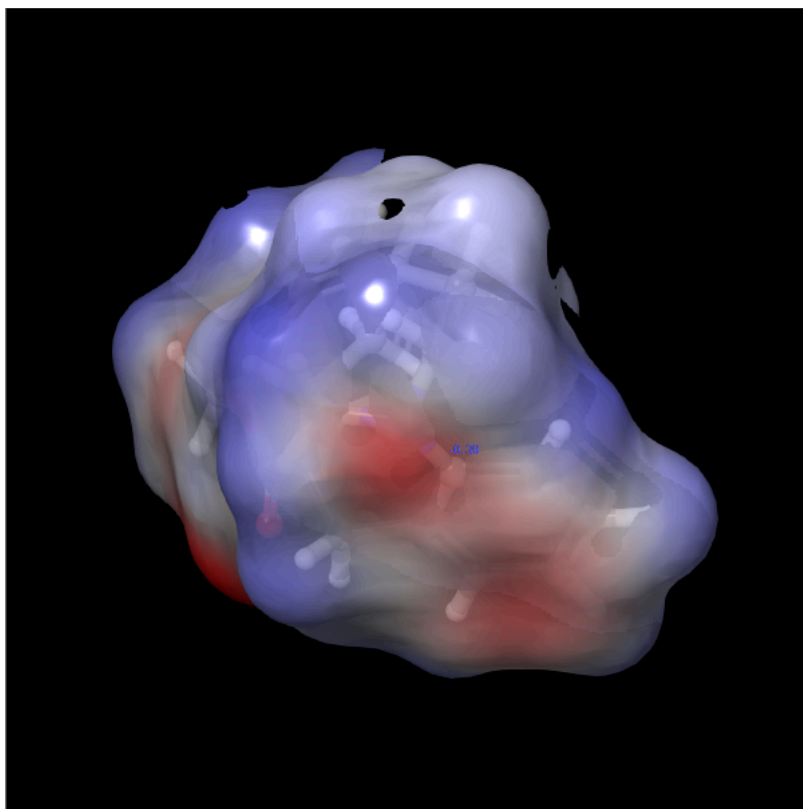

Convergence parameters in DMSO for **7d**:

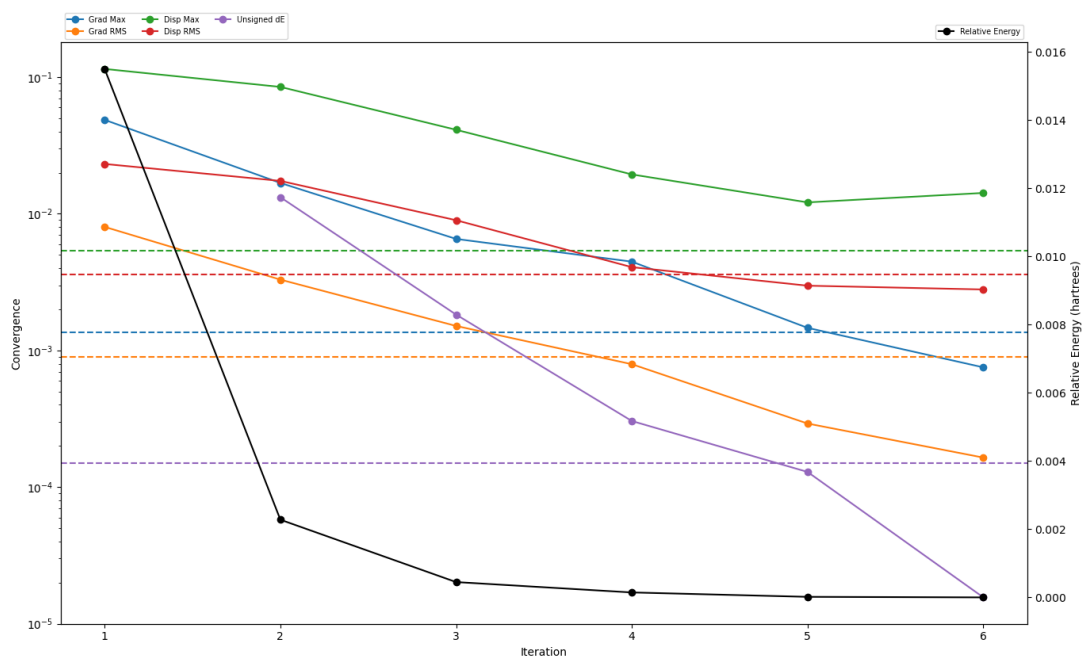

Geometry optimised in water for **7d**:

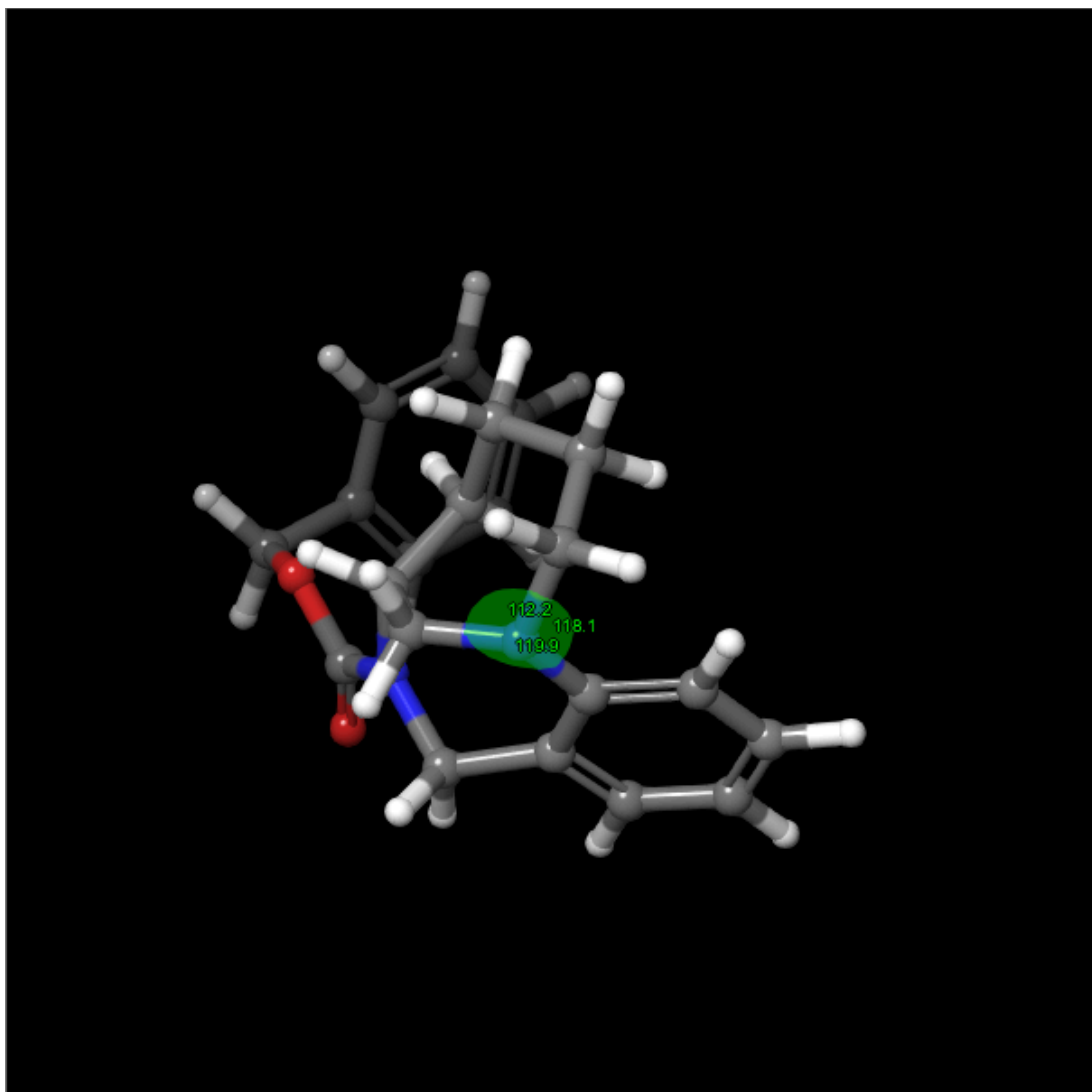

Sum of bond angles at nitrogen:  $\Sigma_{\text{angles}} = 350.2^\circ$



Electrostatic potential map in water for **7d**:

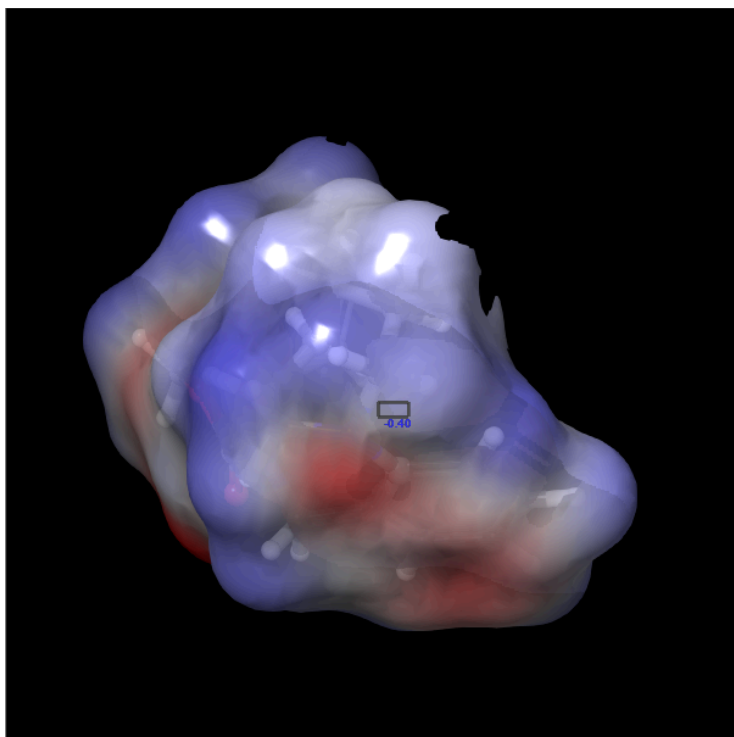

Convergence parameters in water for **7d**:

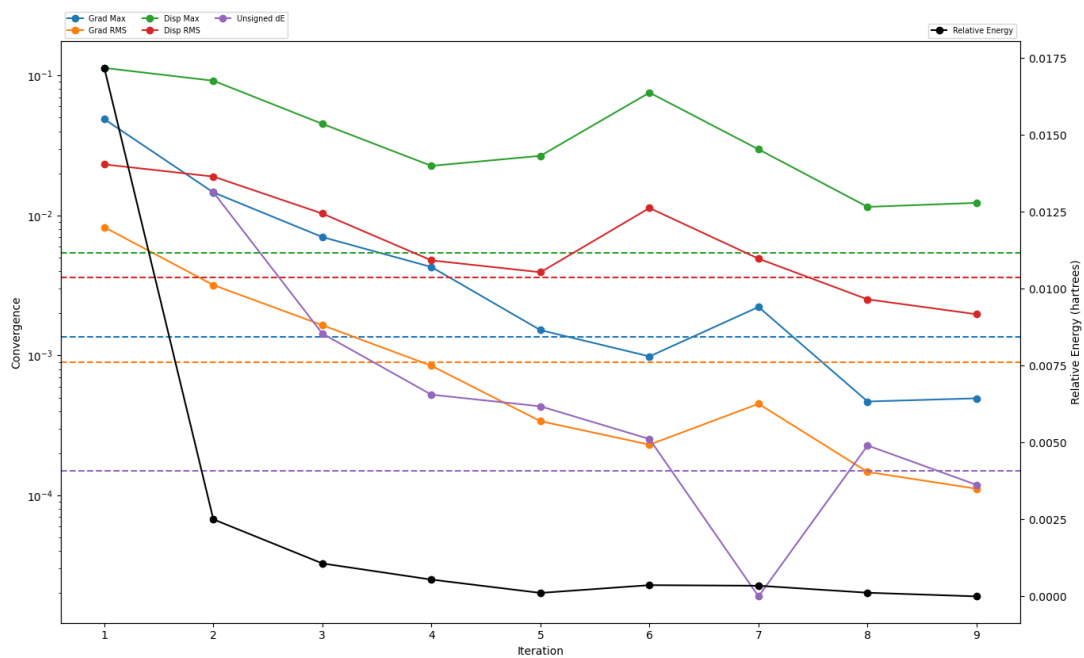

$pK_a(\text{water JPM}) = 1.27 (+/-0.5)$

## 8. Antimicrobial Assays of Twisted Lactams

### General Experimental:

All antibacterial screening was performed by Julian Chesti (University of Leeds). Minimum inhibitory concentration (MIC) values for selected compounds were determined by broth microdilution against *S. aureus* strain ATCC<sub>29213</sub><sup>25</sup> according to CLSI guidelines for low solubility compounds except for using Iso-Sensitest Broth (ISB) in place of cation-adjusted Mueller-Hinton Broth (MHB-II).<sup>26</sup>

A 2-fold dilution series of the isolated compounds in DMSO was prepared, ranging from 6400–12.5  $\mu\text{g mL}^{-1}$ . Each dilution was transferred into a 96-well format at a final volume of 1  $\mu\text{L}$  and 99  $\mu\text{L}$  of the standardised culture was added to each well to give final antibiotic concentrations of 64–0.125  $\mu\text{g mL}^{-1}$  (1% DMSO in ISB). Plates were incubated for 16 h at 37 °C (Inkubator 1000, Heidolph) and the minimum inhibitory concentration (MIC) was determined visually as the lowest concentration at which growth was inhibited.

**Raw Data:**

Table 8.1: Plate reader raw data for the twisted lactam series.

| Sample                                                                                    | Replicate | Measured absorbance values as optical density for each concentration of sample |         |           |              |         |
|-------------------------------------------------------------------------------------------|-----------|--------------------------------------------------------------------------------|---------|-----------|--------------|---------|
|                                                                                           |           | 32 µg/mL                                                                       | 4 µg/mL | 0.5 µg/mL | 0.0625 µg/mL | 0 µg/mL |
| 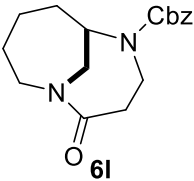<br>6l   | 1         | 3.918                                                                          | 3.36    | 1.971     | 1.667        | 3.408   |
|                                                                                           | 2         | 5.466                                                                          | 4.247   | 3.204     | 2.95         | 5.054   |
| <br>6f  | 1         | 4.054                                                                          | 3.472   | 3.154     | 5.736        | 4.271   |
|                                                                                           | 2         | 4.886                                                                          | 5.404   | 4.934     | 2.102        | 2.582   |
| <br>6k | 1         | 4.87                                                                           | 3.682   | 2.845     | 3.177        | 5.371   |
|                                                                                           | 2         | 5.583                                                                          | 4.146   | 4.798     | 3.664        | 4.019   |
| <br>6d | 1         | 4.867                                                                          | 5.643   | 4.623     | 4.357        | 5.841   |
|                                                                                           | 2         | 4.879                                                                          | 4.466   | 5.67      | 4.125        | 5.663   |
| <br>6e | 1         | 0.187                                                                          | 4.827   | 3.078     | 2.705        | 2.67    |
|                                                                                           | 2         | 0.188                                                                          | 4.796   | 2.356     | 2.308        | 3.376   |

|                                                                                                 |   |       |       |       |       |       |
|-------------------------------------------------------------------------------------------------|---|-------|-------|-------|-------|-------|
| 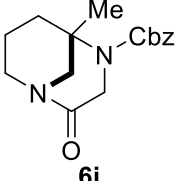<br><b>6i</b>  | 1 | 3.445 | 2.639 | 2.841 | 3.343 | 3.103 |
|                                                                                                 | 2 | 3.101 | 3.363 | 2.775 | 2.76  | 3.421 |
| <br><b>6j</b>  | 1 | 3.268 | 3.237 | 3.317 | 3.095 | 2.819 |
|                                                                                                 | 2 | 5.384 | 5.183 | 2.661 | 2.9   | 3.545 |
| <br><b>6c</b> | 1 | 3.825 | 3.511 | 3.327 | 2.991 | 3.393 |
|                                                                                                 | 2 | 4.369 | 5.291 | 3.289 | 5.222 | 3.571 |

Table 8.2: Plate reader raw data for active twisted lactam **6e** against control **6f**. MIC = 32  $\mu\text{g}/\text{mL}$

| Concentration<br>( $\mu\text{g}/\text{mL}$ ) | Measured absorbance values as optical density for each concentration of sample |       |          |       |          |       |                                   |       |
|----------------------------------------------|--------------------------------------------------------------------------------|-------|----------|-------|----------|-------|-----------------------------------|-------|
|                                              | Colony 1                                                                       |       | Colony 2 |       | Colony 3 |       | Colony 1<br>(Control, <b>6f</b> ) |       |
| 64                                           | 0.139                                                                          | 0.157 | 0.145    | 0.156 | 0.87     | 0.157 | 5.717                             | 5.237 |
| 32                                           | 0.122                                                                          | 4.638 | 3.687    | 0.171 | 0.16     | 0.165 | 4.494                             | 4.652 |
| 16                                           | 3.978                                                                          | 5.883 | 6.027    | 6.091 | 5.813    | 5.158 | 5.197                             | 4.331 |
| 8                                            | 5.239                                                                          | 5.654 | 4.97     | 4.961 | 5.417    | 5.738 | 5.24                              | 5.45  |

|       |       |       |       |       |       |       |       |       |
|-------|-------|-------|-------|-------|-------|-------|-------|-------|
| 4     | 5.447 | 6.968 | 6.727 | 5.822 | 6.456 | 5.725 | 5.253 | 5.391 |
| 2     | 5.212 | 5.572 | 5.745 | 4.688 | 4.976 | 4.86  | 5.072 | 5.165 |
| 1     | 5.42  | 5.817 | 5.272 | 5.404 | 5.435 | 5.152 | 3.984 | 4.966 |
| 0.5   | 5.422 | 5.224 | 5.511 | 4.987 | 5.49  | 5.591 | 4.905 | 5.146 |
| 0.25  | 5.295 | 5.167 | 4.935 | 4.813 | 4.992 | 5.222 | 4.672 | 4.968 |
| 0.125 | 5.32  | 5.055 | 5.341 | 5.036 | 4.98  | 5.099 | 5.231 | 5.513 |

**Growth inhibition:**

Growth inhibition values were calculated for lactam **6e** within excel using the optical density (OD) data obtained from the plate reader presented in table 8.2, using equation 1. Duplicates and colonies were averaged. Outlining values were excluded. Growth inhibition was calculated at 97.247% (64 µg/mL) and 96.621 (32 µg/mL).

$$Growth\ inhibition\ (\%) = \frac{(OD_{control} - OD_{sample})}{OD_{control}} \times 100 \#(1)$$

## 9. References

1. Sheldrick G.M., *Acta Crystallogr. A* 2015, **71**, 3–8.
2. Sheldrick G.M., *Acta Crystallogr. C* 2015, **71**, 3–8.
3. Trindade A., Faulkner E., Leach A., Nelson A. and Marsden S.P., *Chem. Commun.* 2020, 8802–5.
4. Tereshchenko O.D., Perebiynis M.Y., Knysh I. V., Vasylets O. V., Sorochenko A.A., Slobodyanyuk E.Y., et al., *Adv. Synth. Catal.* 2020, **362**, 3229–42.
5. Francis D., Nelson A. and Marsden S.P., *Chem. - A Eur. J.* 2020, **26**, 14861–5.
6. Hassan H., Marsden S.P. and Nelson A., *Bioorganic Med. Chem.* 2018, **26**, 3030–3.
7. Xia Q., Li Y., Cheng L., Liang X., Cao C., Dai P., et al., *Org. Lett.* 2020, **22**, 9638–43.
8. Taylor N.J., Emer E., Preshlock S., Schedler M., Tredwell M., Verhoog S., et al., *J. Am. Chem. Soc.* 2017, **139**, 8267–76.
9. Daly K., Nomak R. and Snyder J.K., *Tetrahedron Lett.* 1997, **38**, 8611–4.
10. Yu J., Truc V., Riebel P., Hierl E. and Mudryk B., *Tetrahedron Lett.* 2005, **46**, 4011–3.
11. McLean E.B., Mooney D.T., Burns D.J. and Lee A.L., *Org. Lett.* 2022, **24**, 686–91.
12. Richards G., Skerry T. M., Harrity, J. P. A., Zirimwabagabo J., Tozer M. J., Gobson K. R., Porter R. A., Glossop P.A., WO2020099882A1, 2020.
13. Berggren K., Vindebro R., Bergström C., Spoerry C., Persson H., Fex T., et al., *J. Med. Chem.* 2012, **55**, 2549–60.
14. Chang C.F., Huang C.Y., Huang Y.C., Lin K.Y., Lee Y.J. and Wang C.J., *Synth. Commun.* 2010, **40**, 3452–66.
15. Mestichelli P., Scott M.J., Galloway W.R.J.D., Selwyn J., Parker J.S. and Spring D.R., *Org. Lett.* 2013, **15**, 5448–51.
16. Szostak M. and Aubé J., *Chem. Rev.* 2013, **113**, 5701–65.
17. Schenck G., Baj K., Iggo J.A. and Wallace M., *Anal. Chem.* 2022, **94**, 8115–9.

18. Trigo-Mouriño P., Merle C., Koos M.R.M., Luy B. and Gil R.R., *Chem. Eur. J.* 2013, **19**, 7013–9.
19. Wallace M., Adams D.J. and Iggo J.A., *Anal. Chem.* 2018, **90**, 4160–6.
20. Schrödinger Release 2023-1: Maestro, Schrödinger, LLC, New York, NY 2021,
21. Bochevarov A.D., Watson M.A., Greenwood J.R. and Philipp D.M., *J. Chem. Theory Comput.* 2016, **12**, 6001–19.
22. Yu H.S., Watson M.A. and Bochevarov A.D., *J. Chem. Inf. Model.* 2018, **58**, 271–86.
23. Kličić J.J., Friesner R.A., Liu S.Y. and Guida W.C., *J. Phys. Chem. A* 2002, **106**, 1327–35.
24. Schrödinger Release 2023-1: Jaguar pKa, Schrödinger, LLC, New York, NY 2021,
25. Soni I., Chakrapani H. and Chopra S., *Genome Announc.* 2015, **3**, 29213.
26. CLSI, Methods for Dilution Antimicrobial Susceptibility Tests for Bacteria That Grow Aerobically. Ninth Edition, Clinical and Laboratory Standards Institute, Wayne P.A., 2012.

# 10. Spectra

## *cis-tert*-Butyl octahydro-2*H*-isoindole-2-carboxylate **S1**

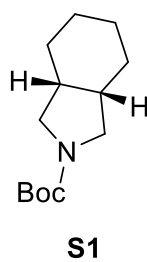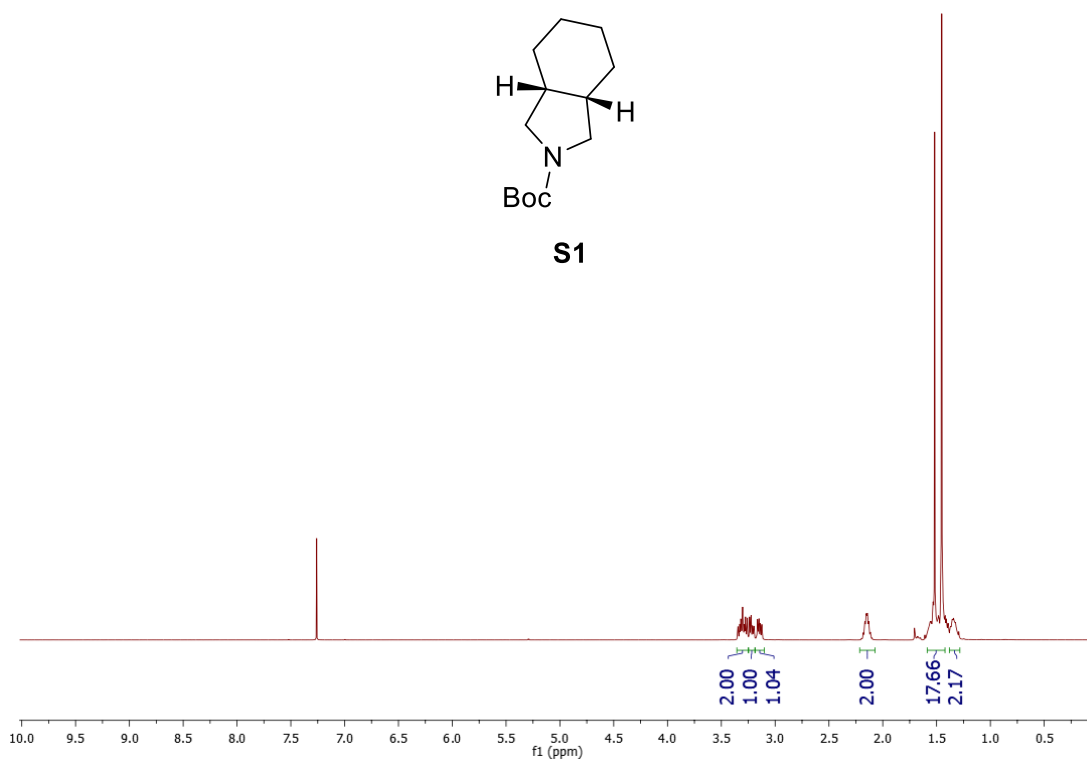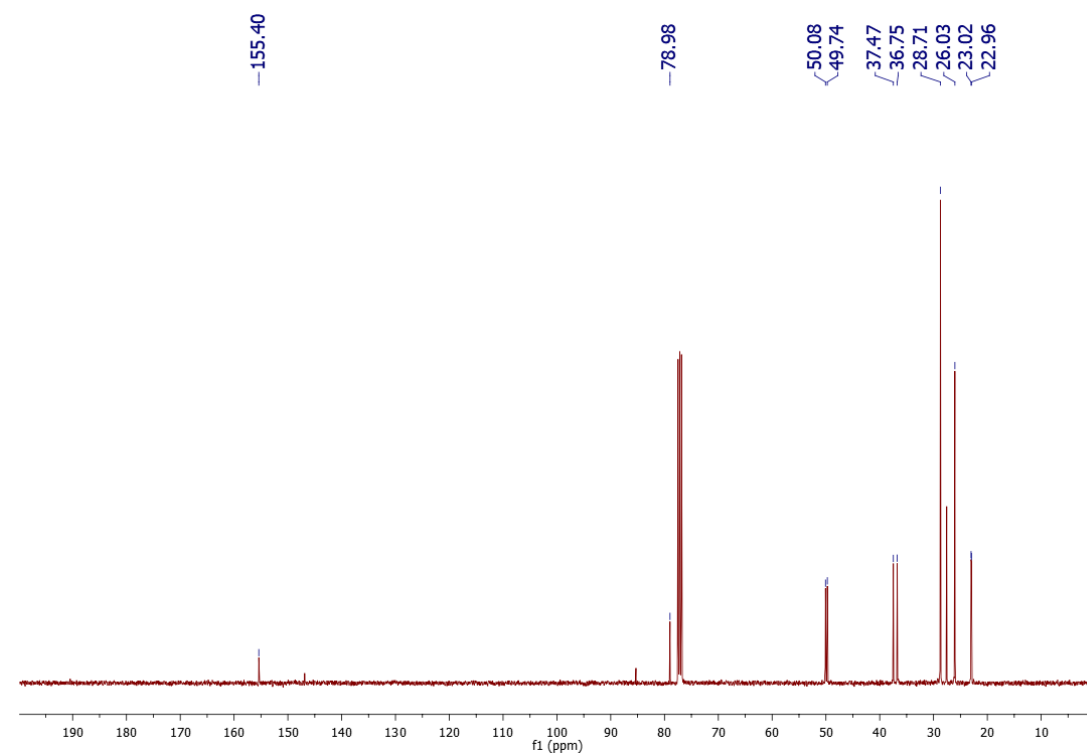



**tert-Butyl 1,4,5,6,7,7a-hexahydro-2H-isindole-2-carboxylate 5b**

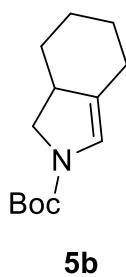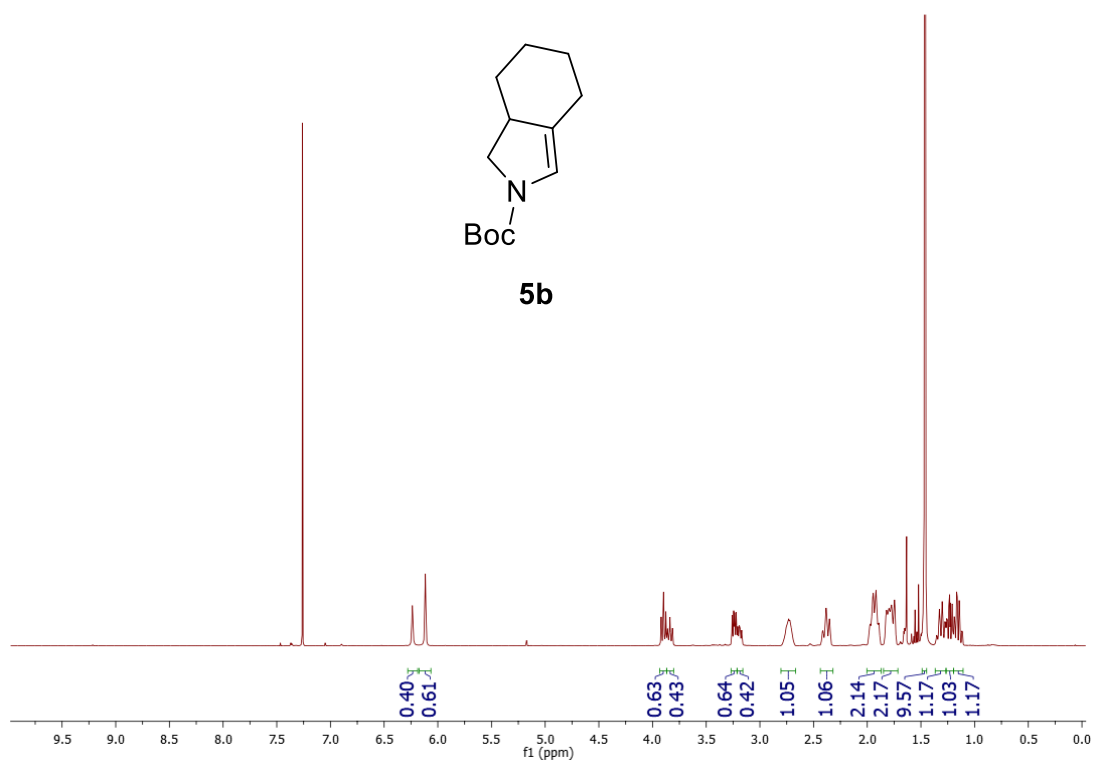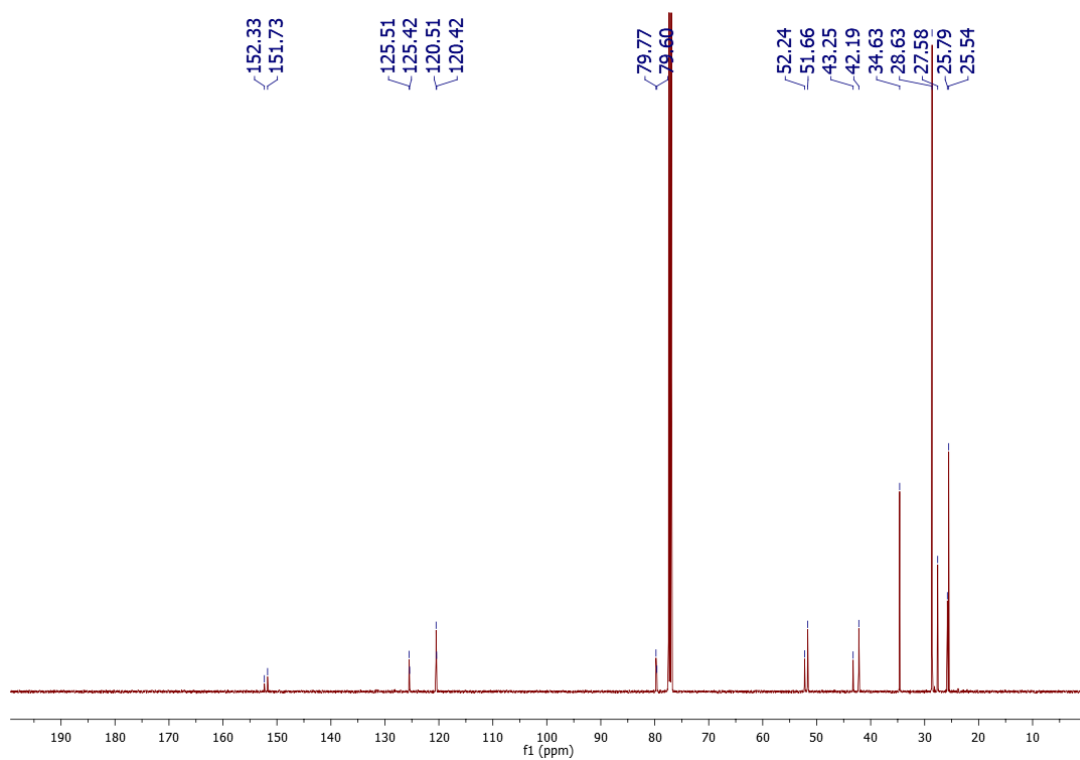

**tert-Butyl piperidine-1-carboxylate S2**

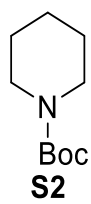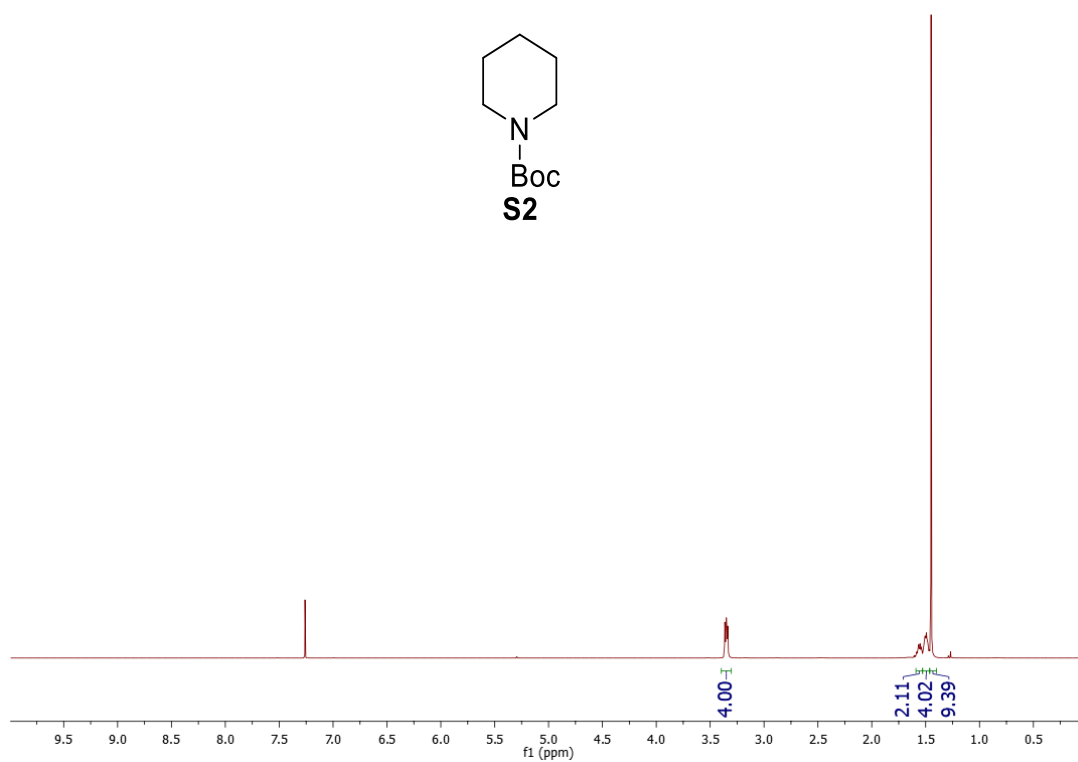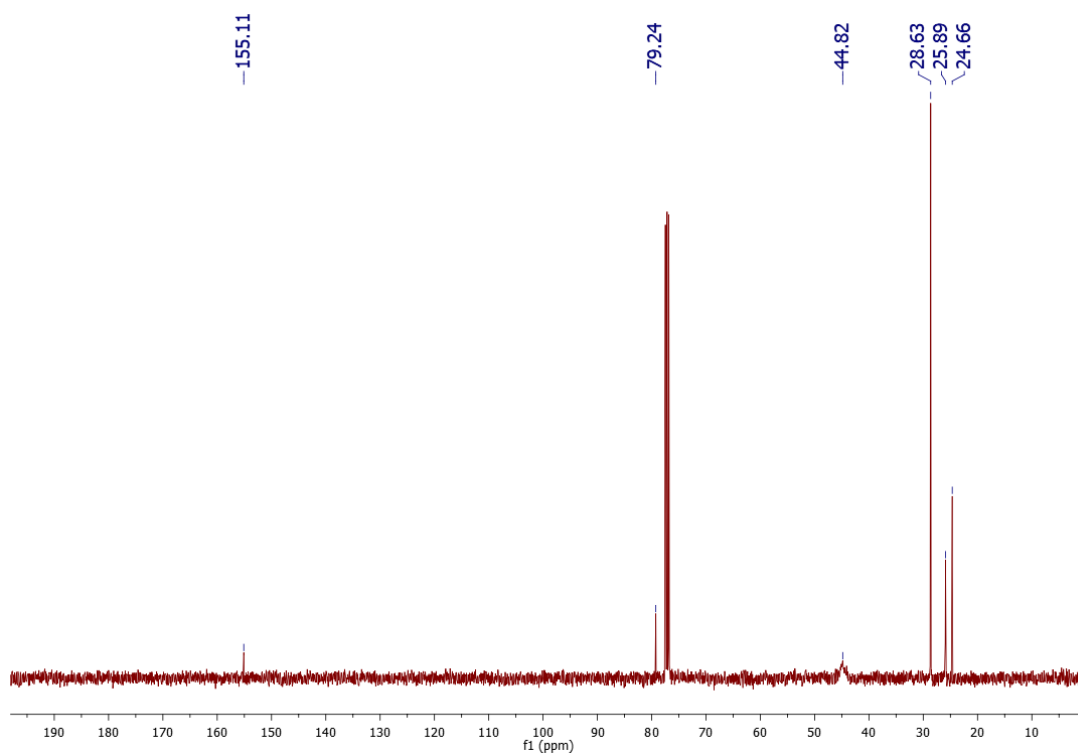

**tert-Butyl 3,4-dihydropyridine-1(2H)-carboxylate 5c**

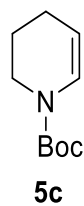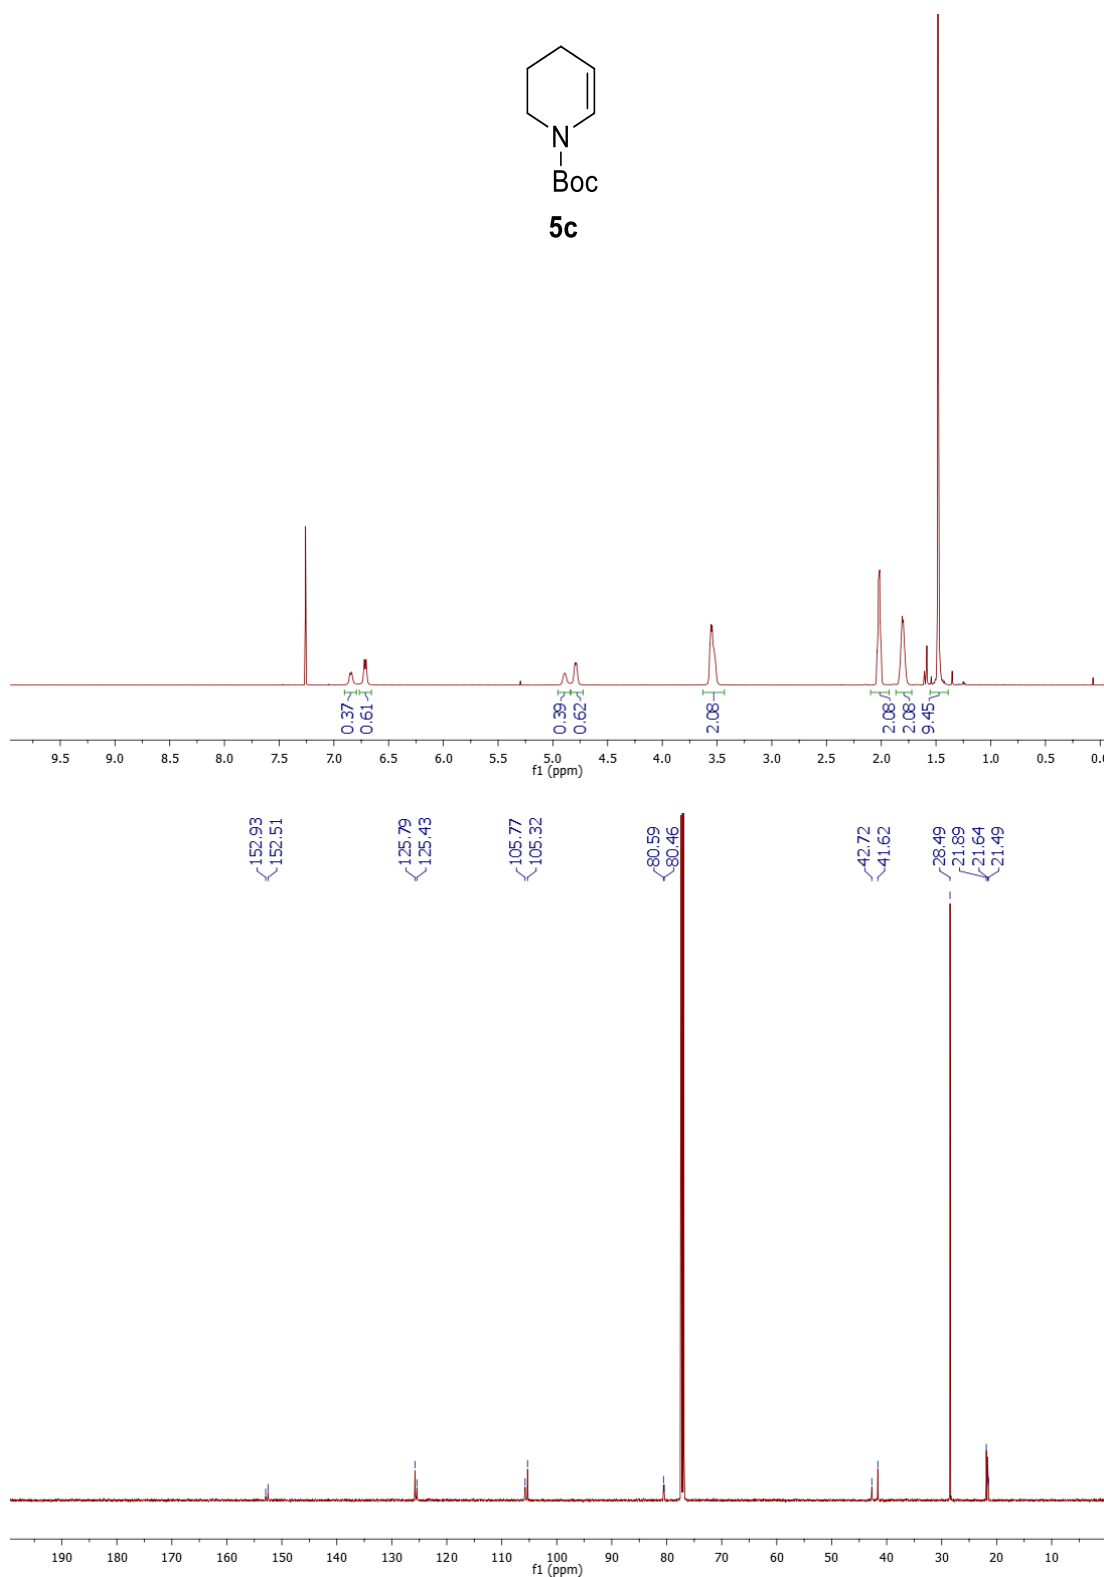

***tert*-Butyl 3-((2-ethoxy-2-oxoethyl)amino)-3-methylpiperidine-1-carboxylate 5d**

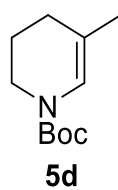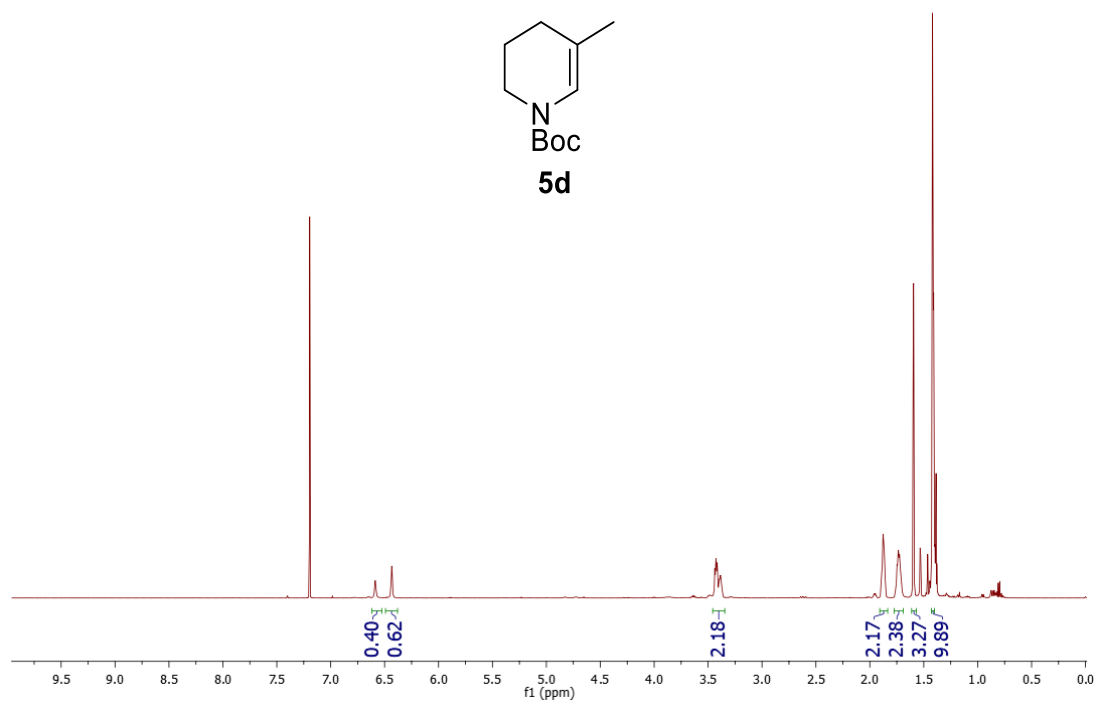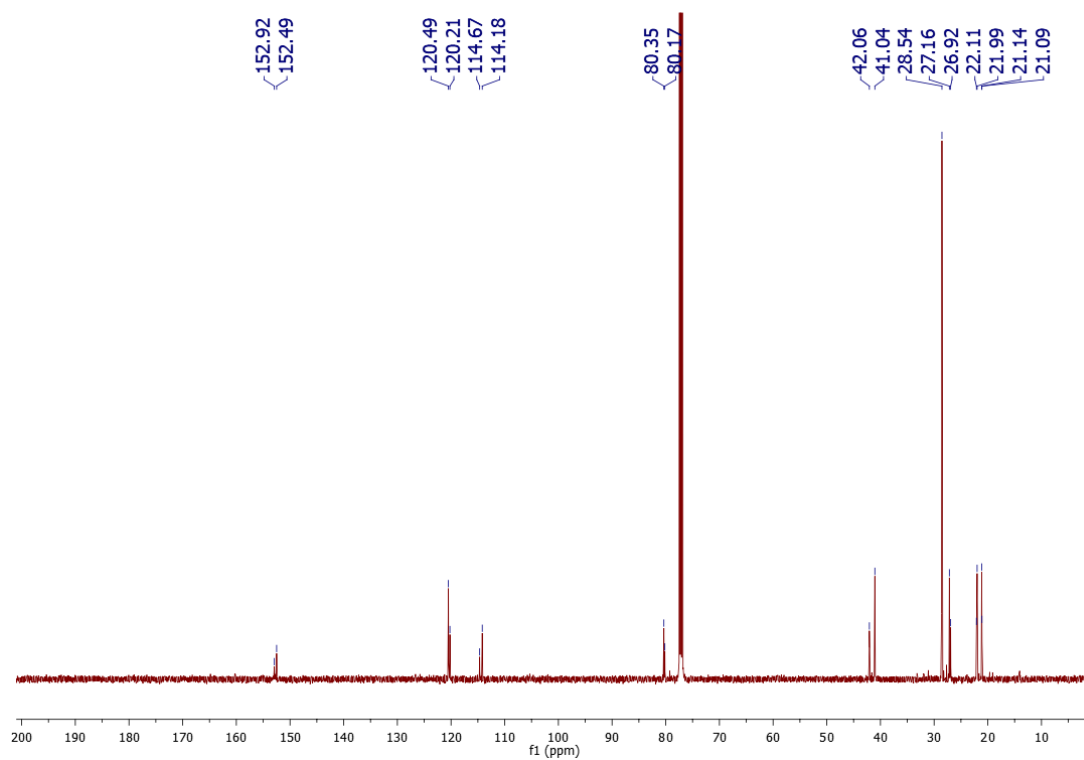

**tert-Butyl azepane-1-carboxylate S3**

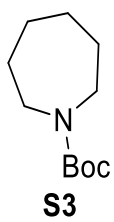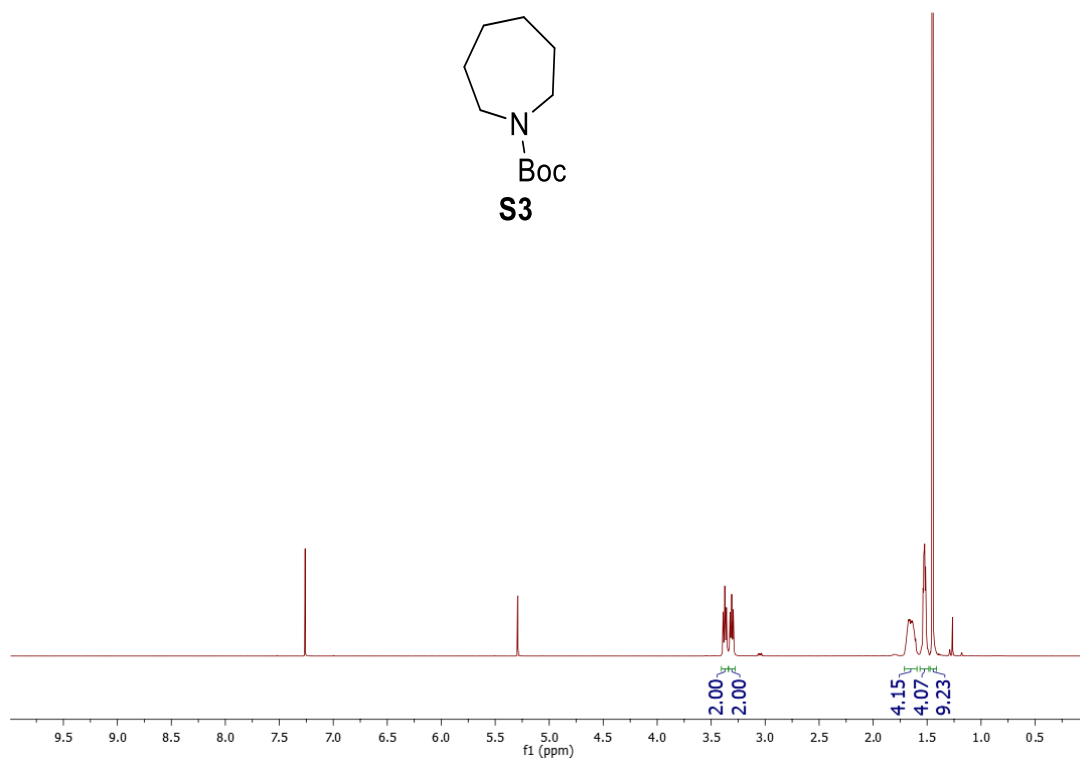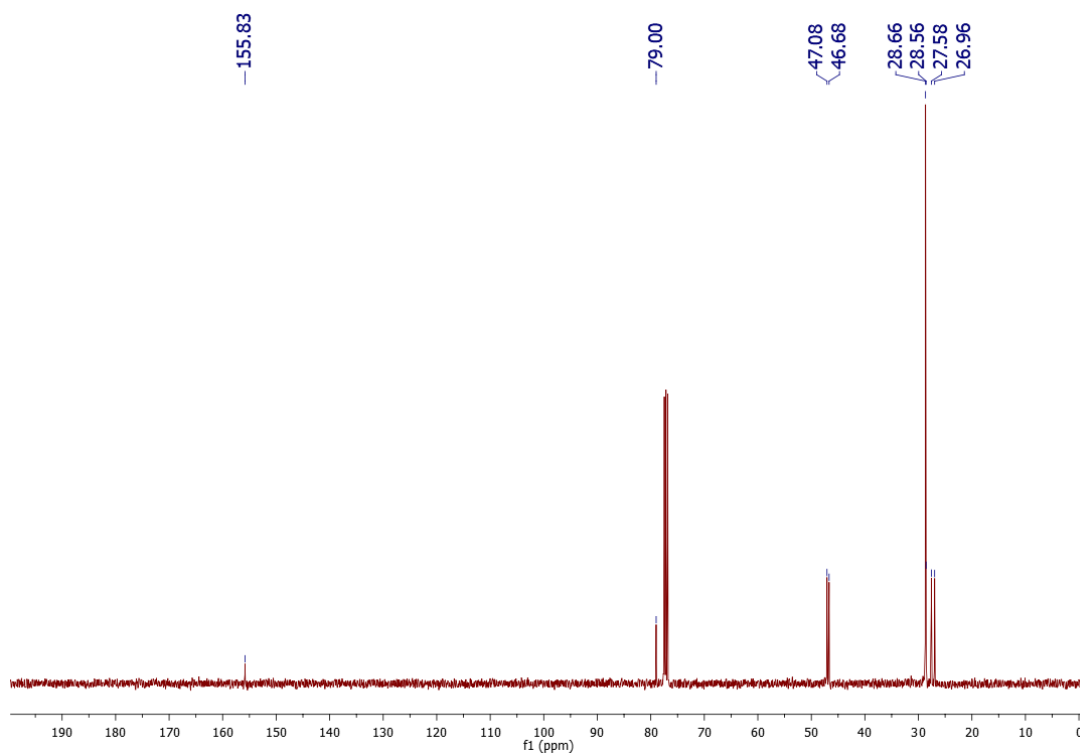

**tert-Butyl 2,3,4,5-tetrahydro-1H-azepine-1-carboxylate 5e**

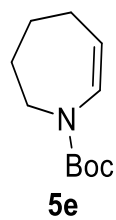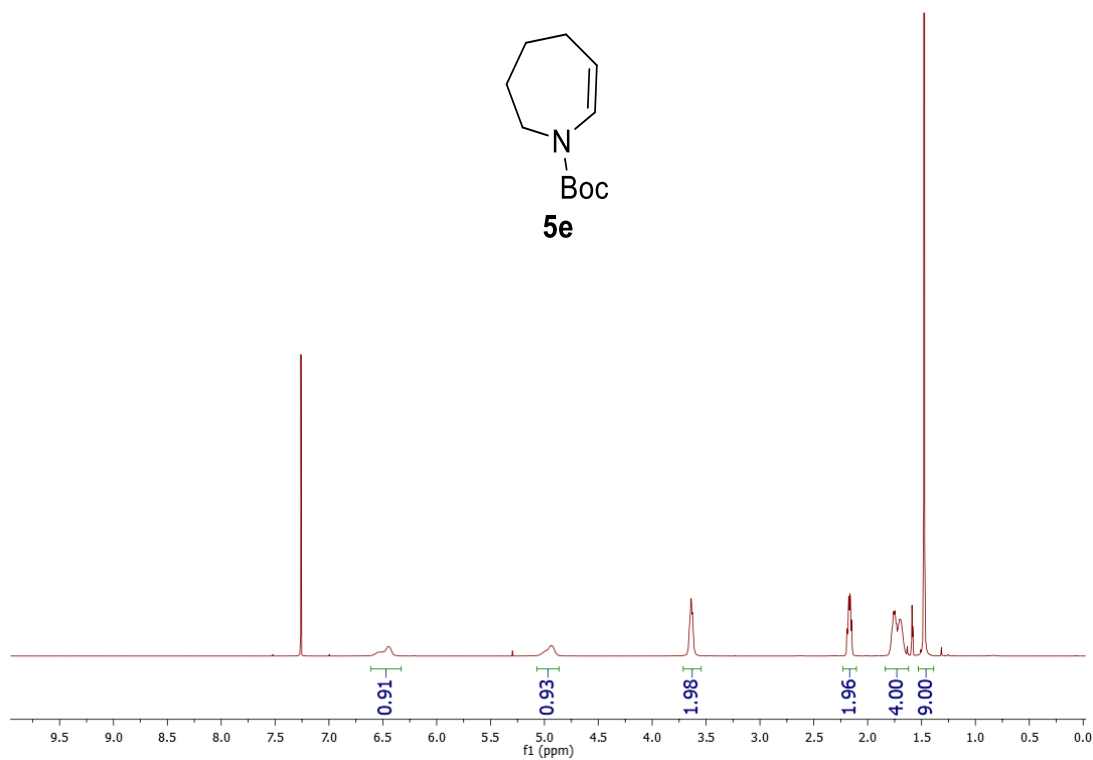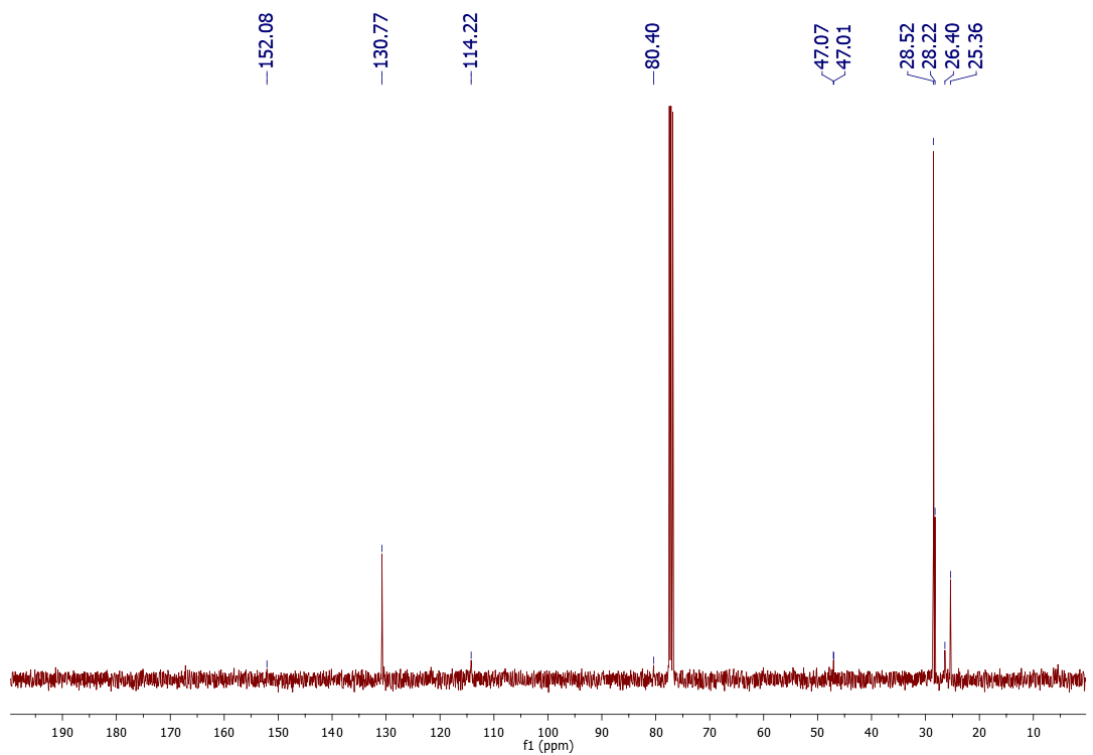

**tert-Butyl 3-((2-ethoxy-2-oxoethyl)amino)pyrrolidine-1-carboxylate S4**

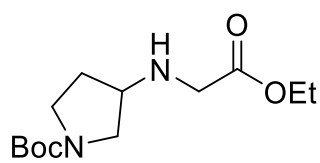

**S4**

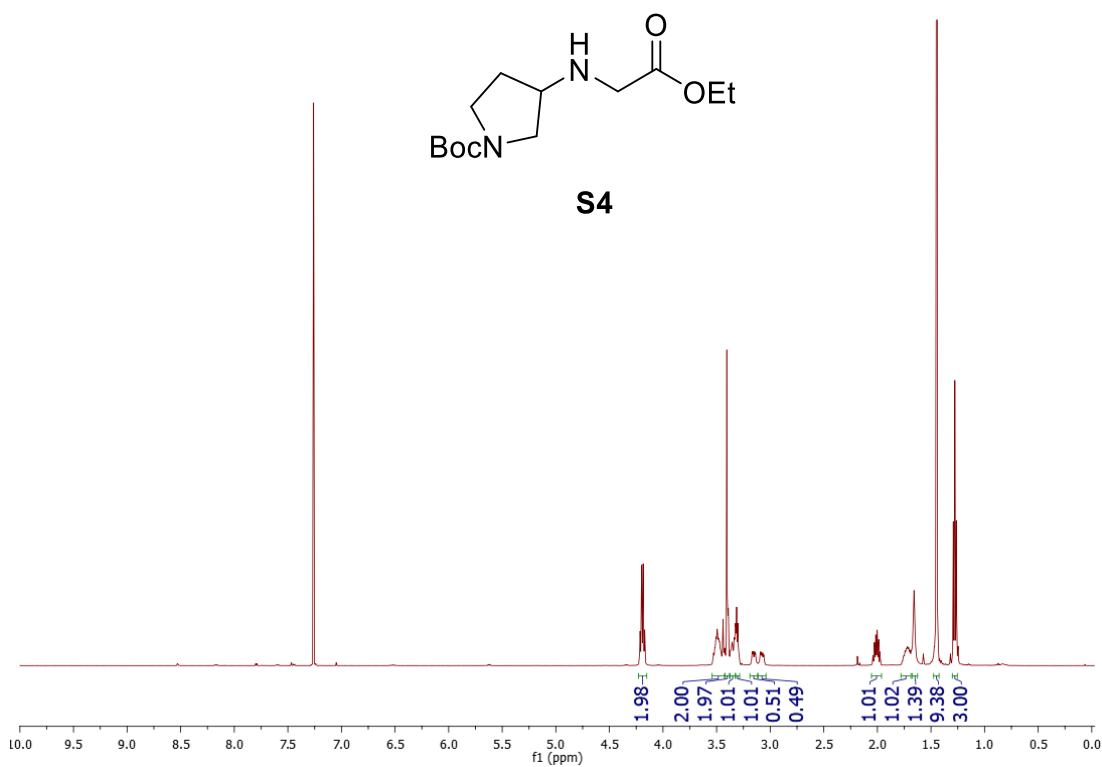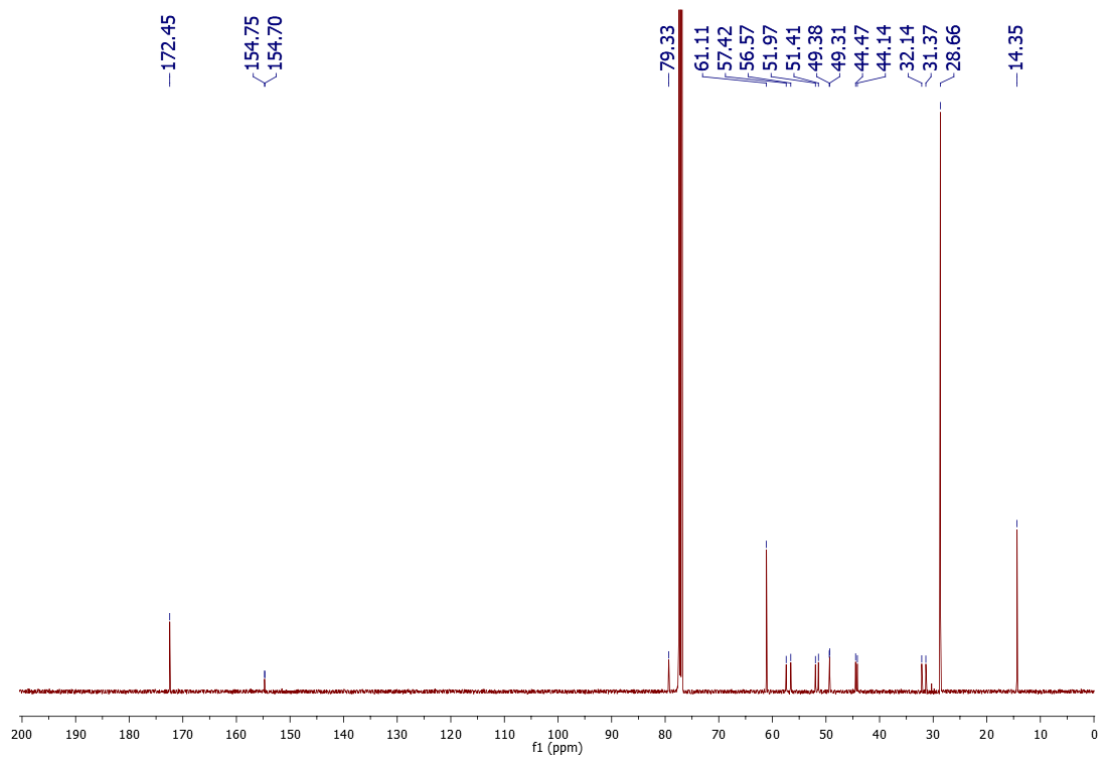

**tert-Butyl 3-(((benzyloxy)carbonyl)(2-ethoxy-2-oxoethyl)amino)pyrrolidine-1-carboxylate 9a**

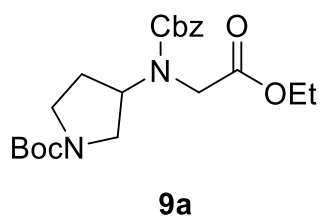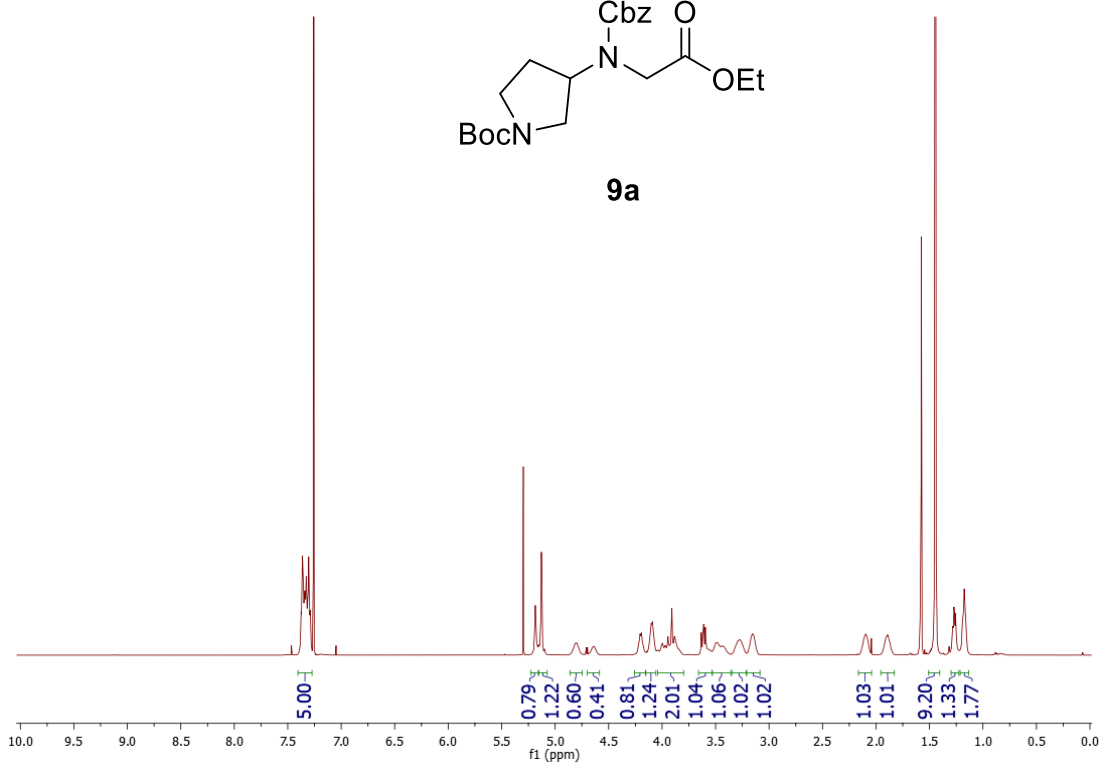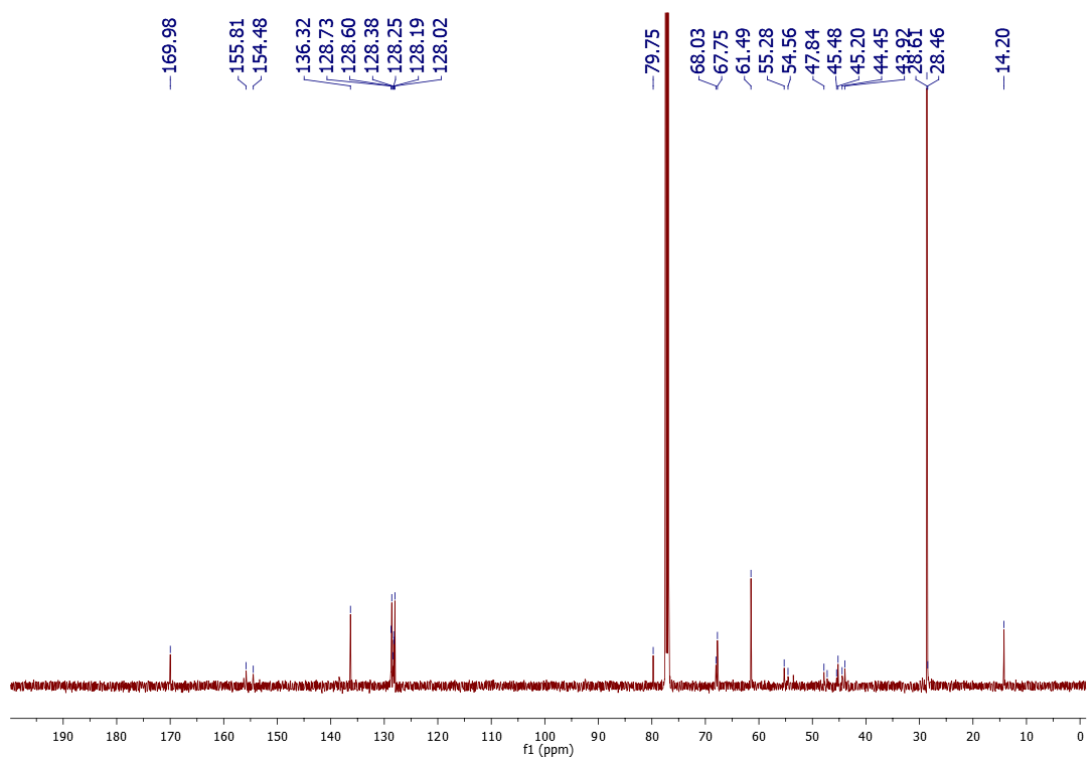



**tert-Butyl 3a-((2-ethoxy-2-oxoethyl)amino)octahydro-2H-isoindole-2-carboxylate**  
**cis-S5**

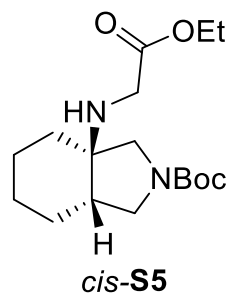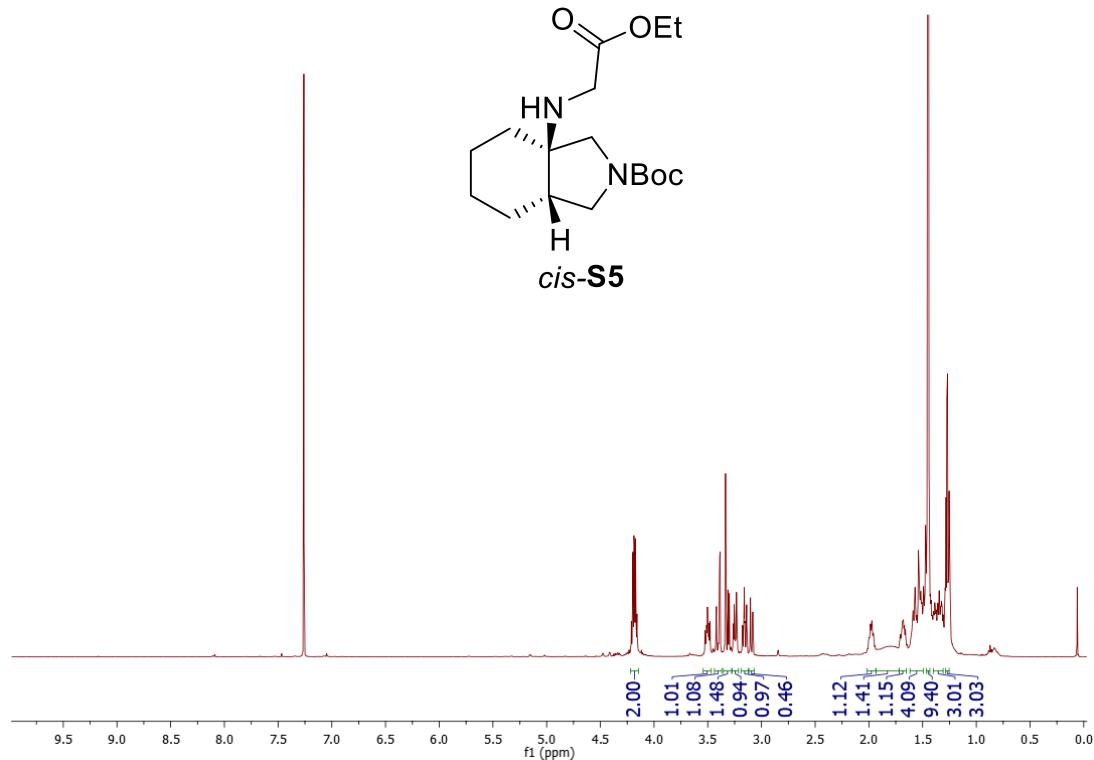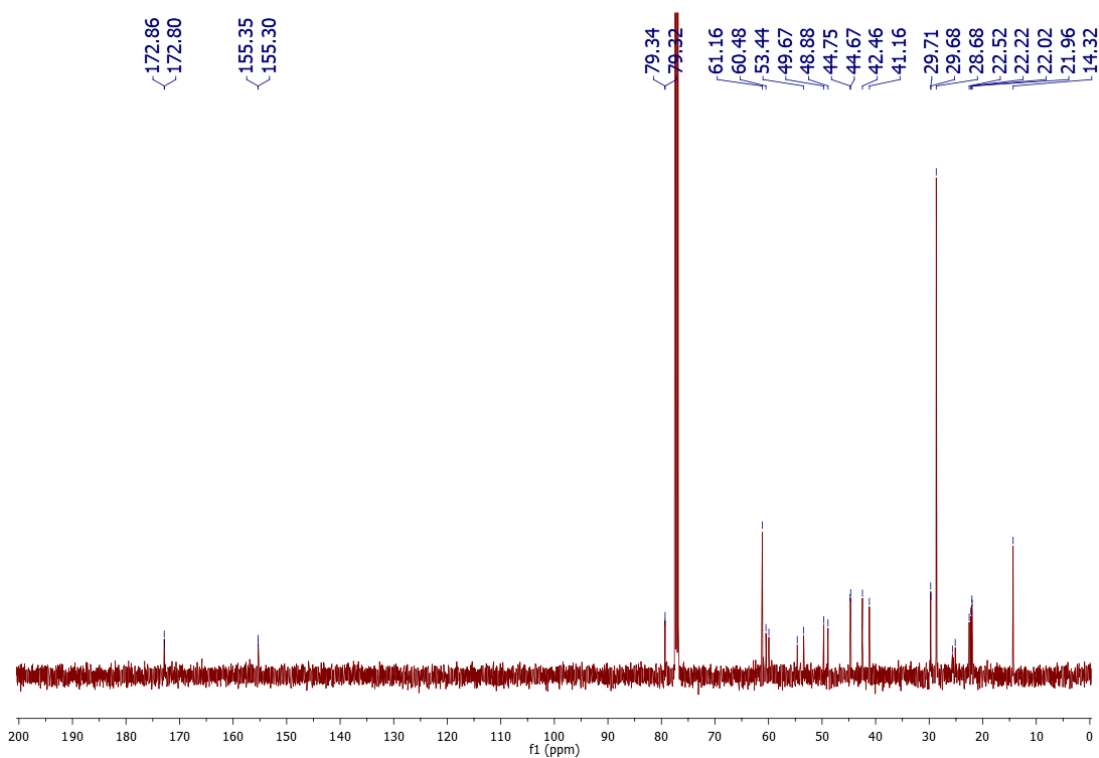

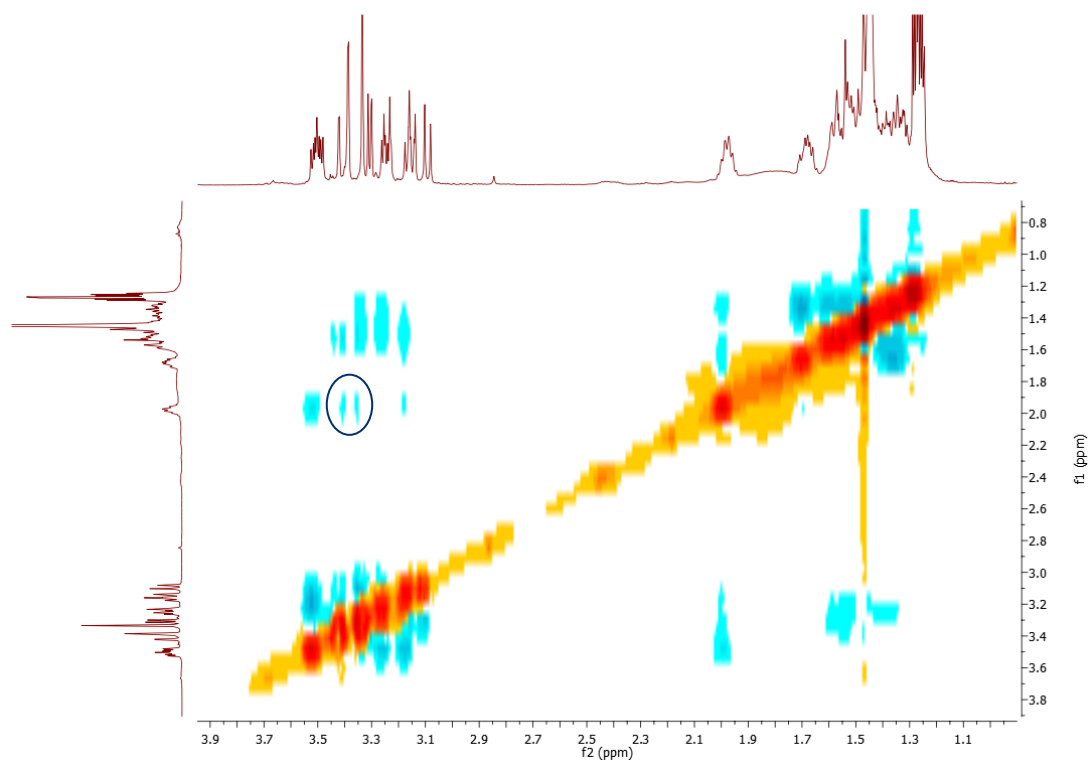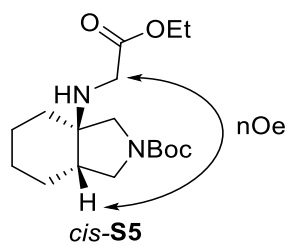

***tert*-Butyl 3a-(((benzyloxy)carbonyl)(2-ethoxy-2-oxoethyl)amino)octahydro-2H-isoindole-2-carboxylate *cis*-9b**

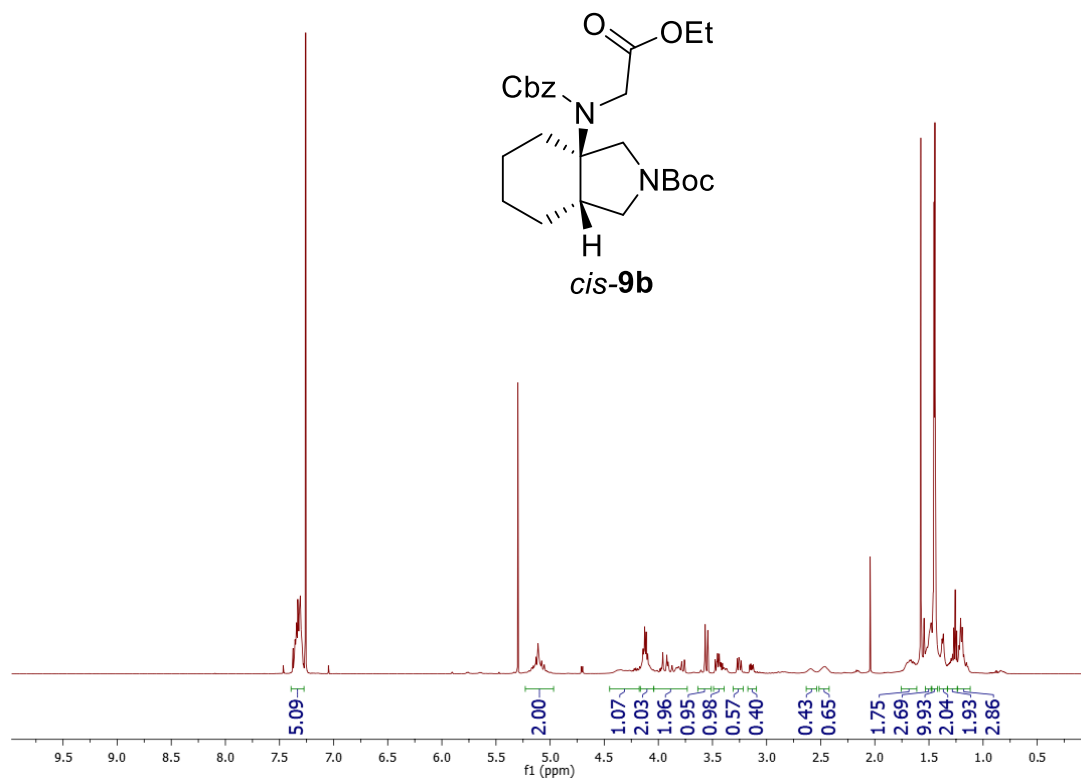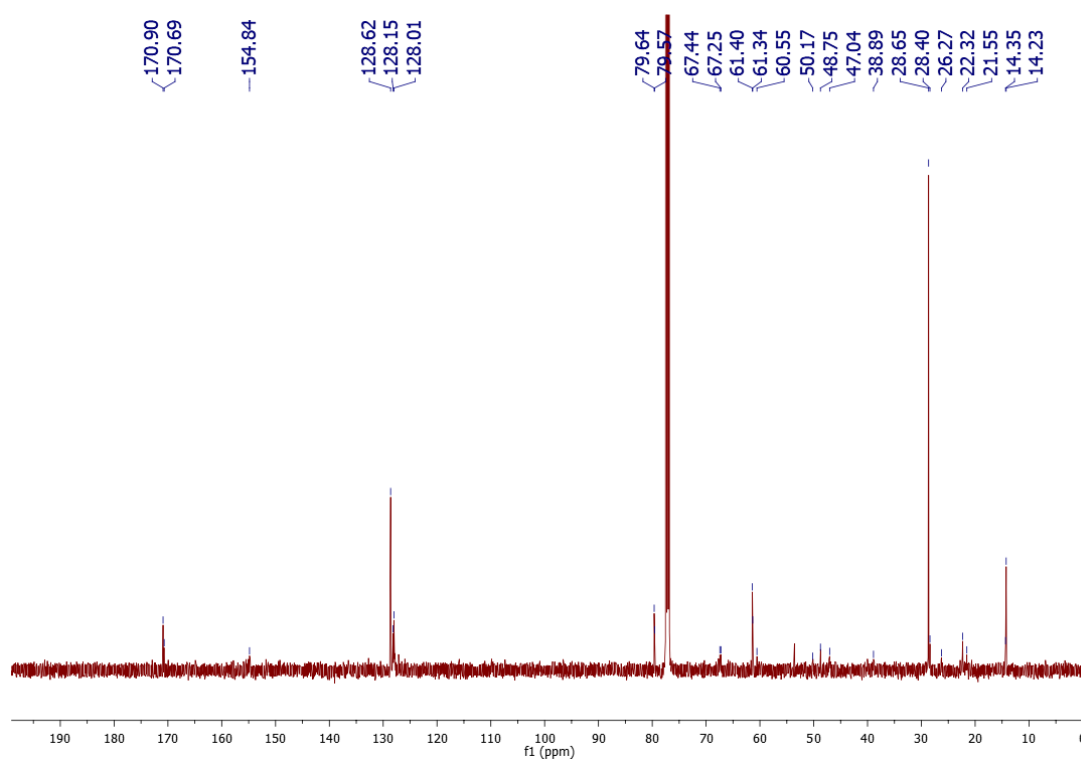

**tert-Butyl 3-((3-ethoxy-3-oxopropyl)amino)pyrrolidine-1-carboxylate S6**

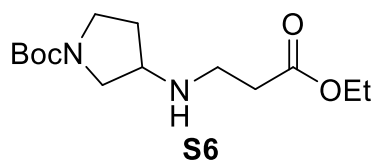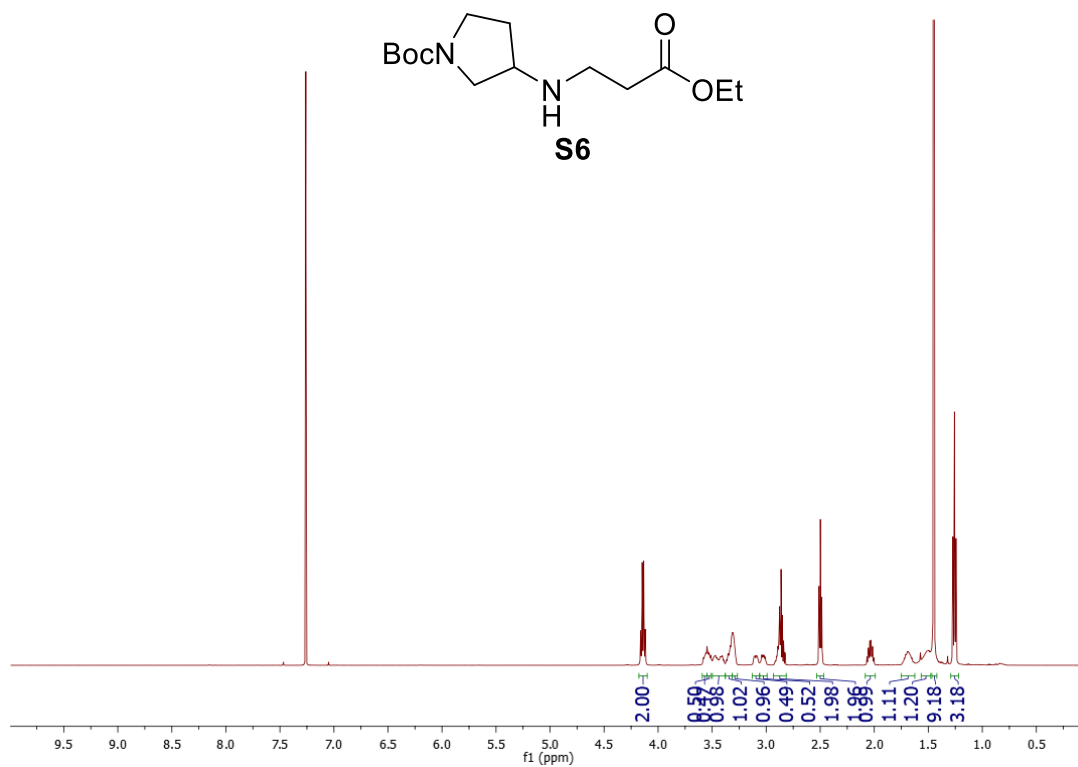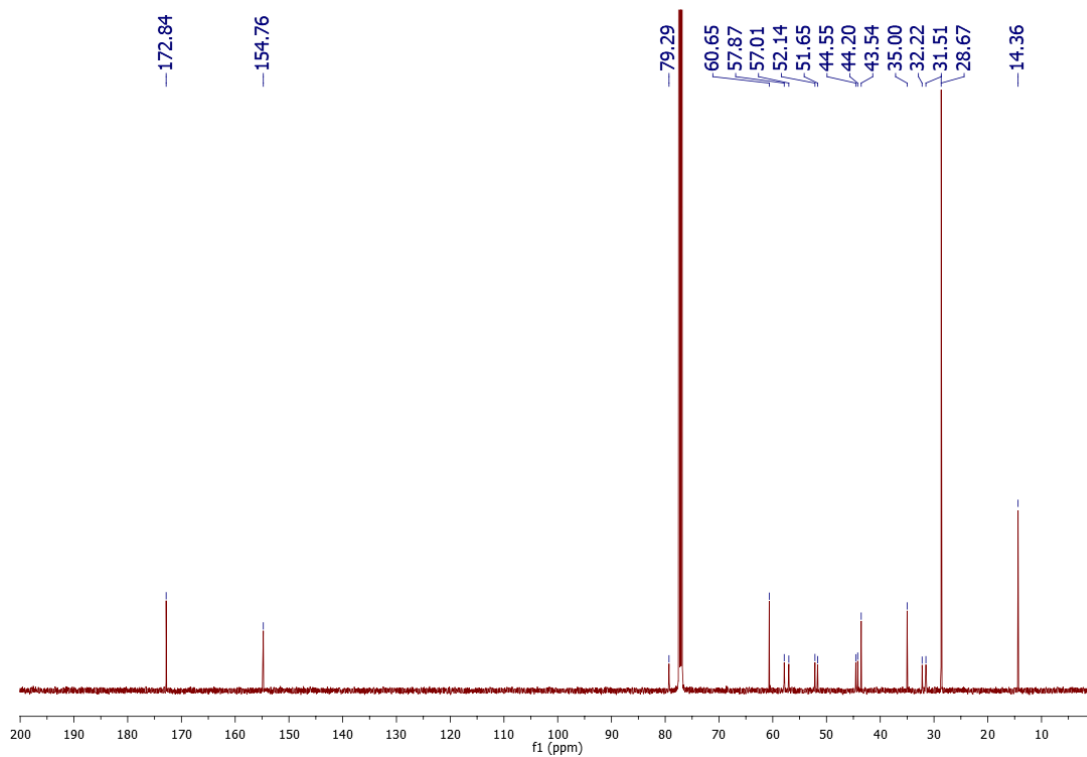

**tert-Butyl 3-((3-ethoxy-3-oxopropyl)amino)pyrrolidine-1-carboxylate 9c**

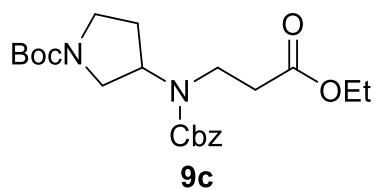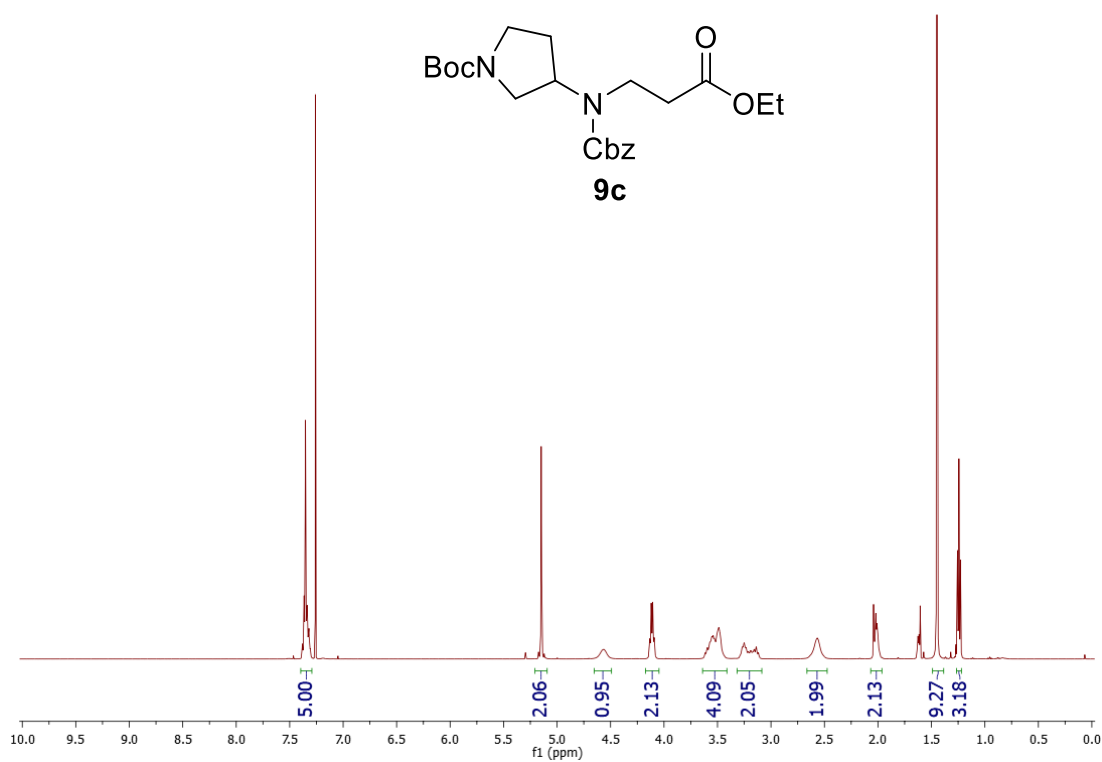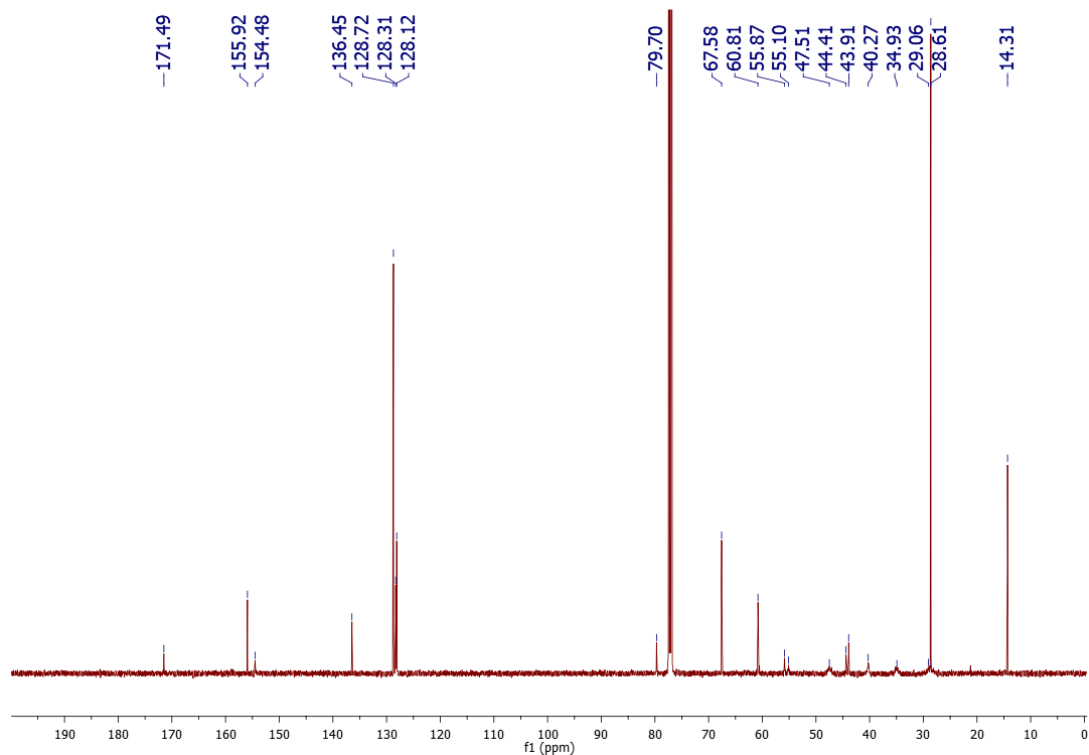

# Benzyl 2-oxo-1,5-diazabicyclo[4.2.1]nonane-5-carboxylate 6c

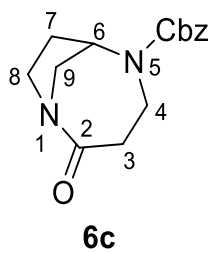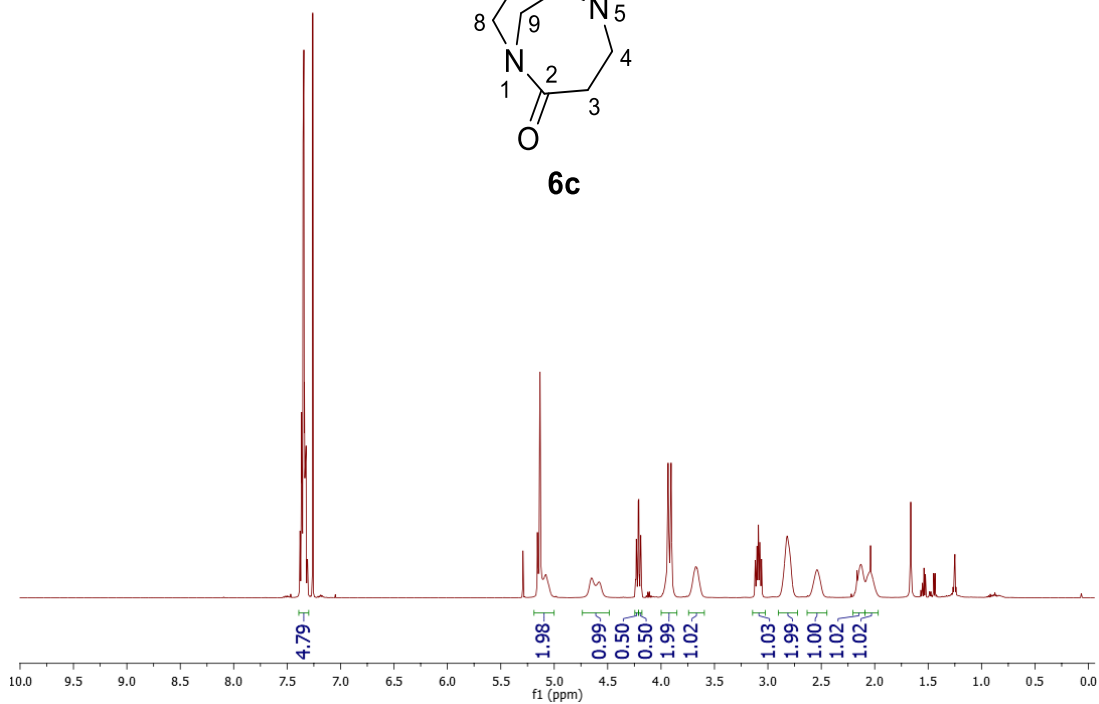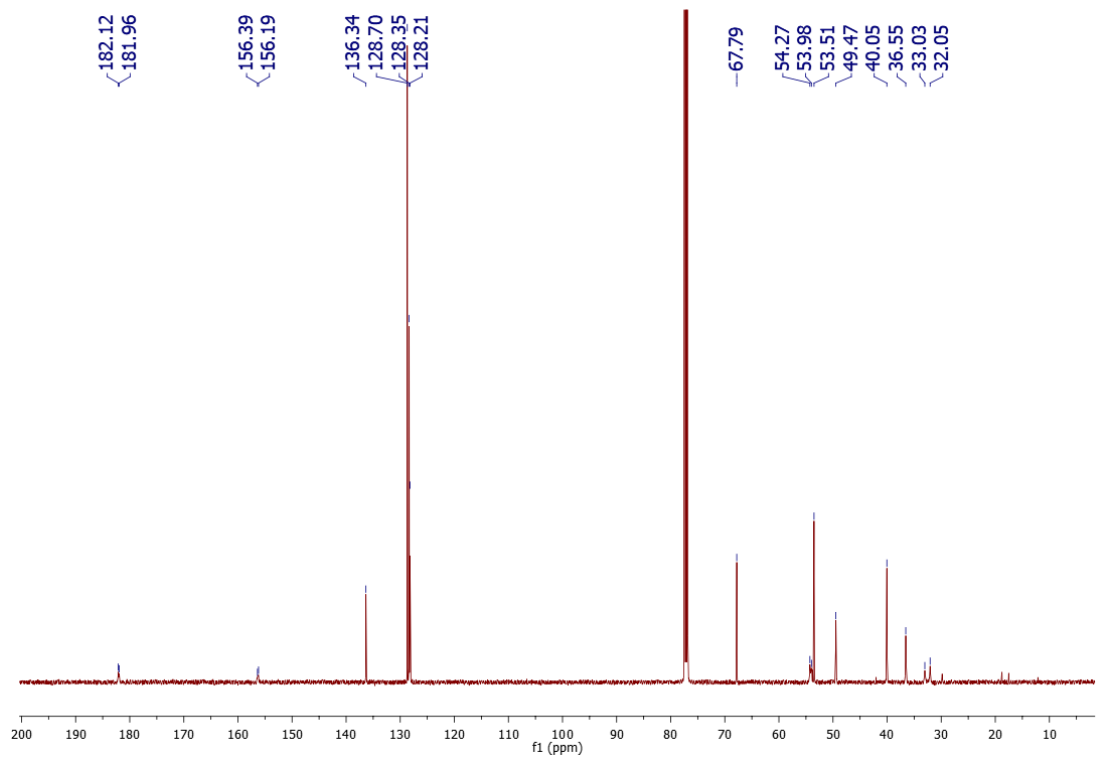

**tert-Butyl 3-((N-(3-ethoxy-3-oxopropyl)-4-methylphenyl)sulfonamido)pyrrolidine-1-carboxylate 9d**

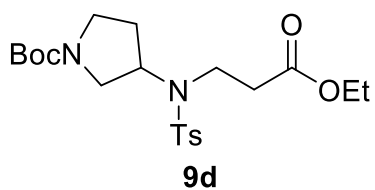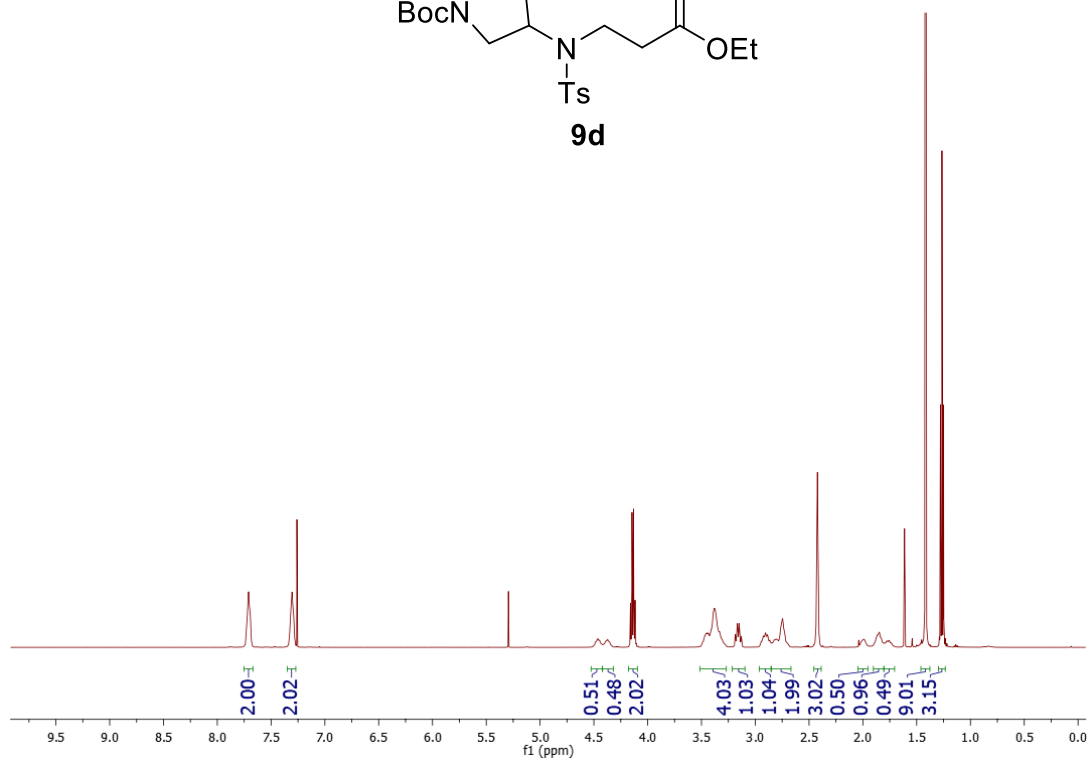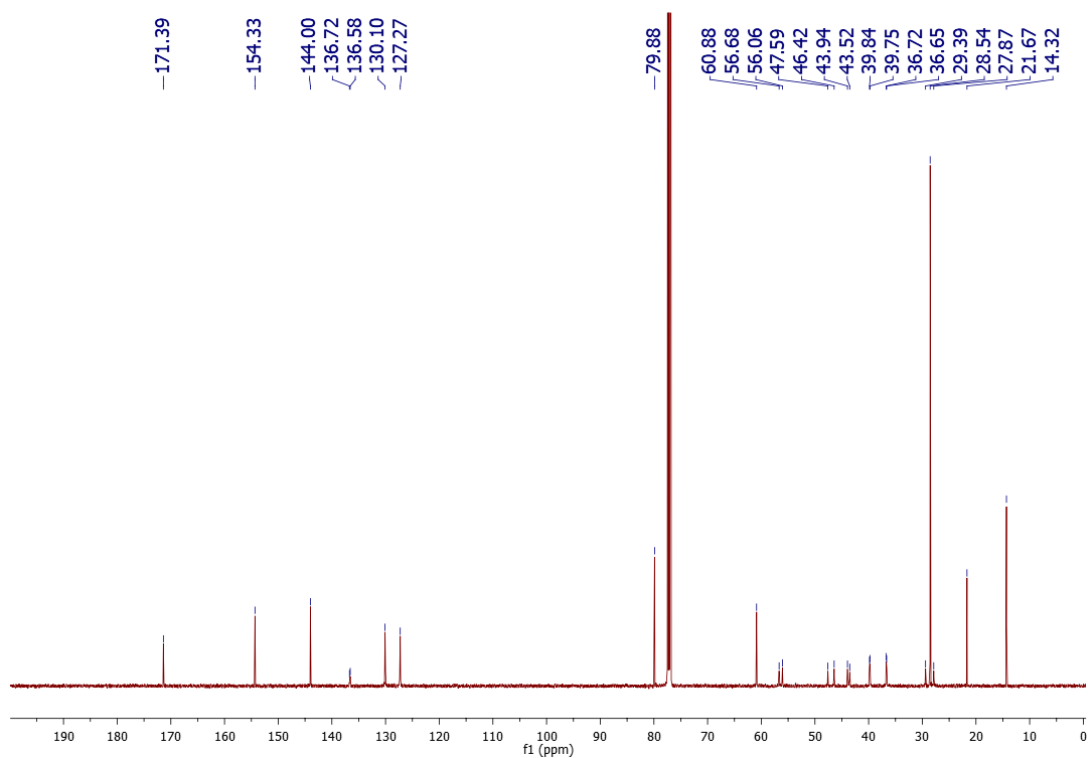

# 5-Tosyl-1,5-diazabicyclo[4.2.1]nonan-2-one 6d

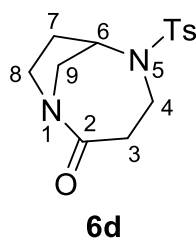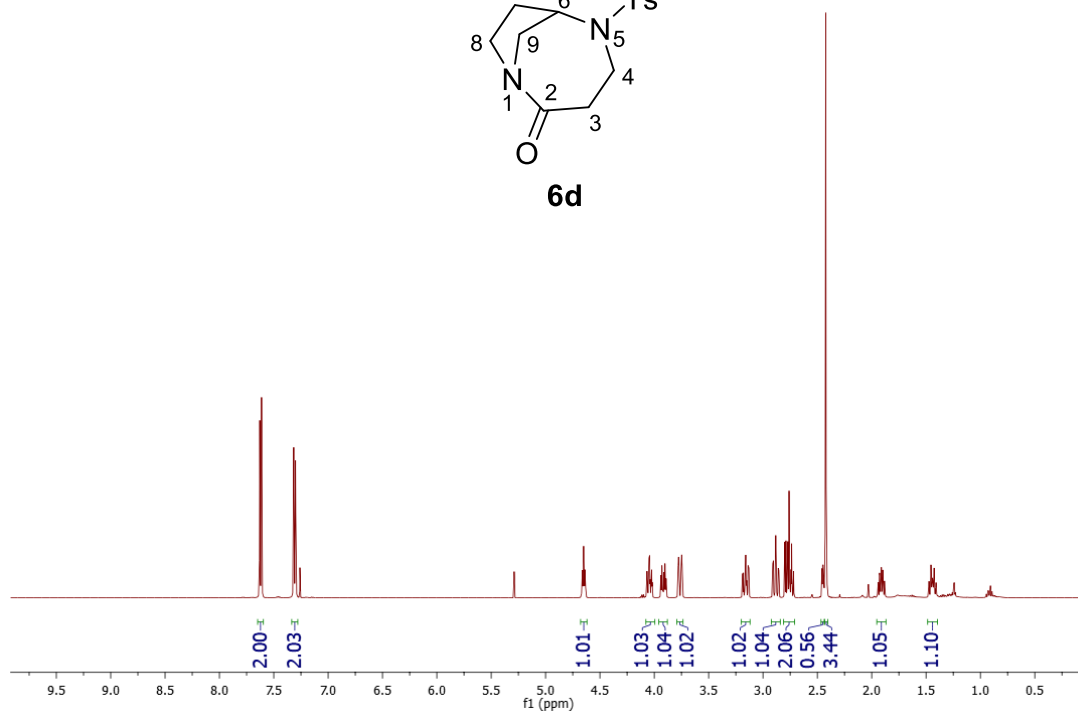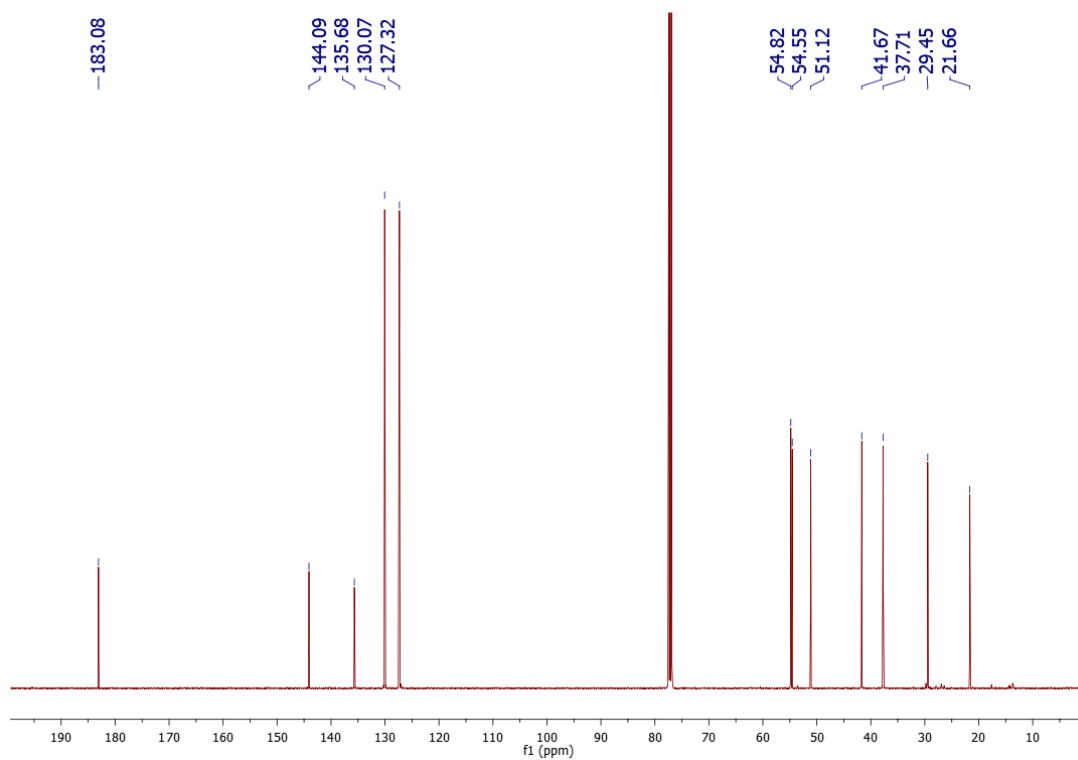



**tert-Butyl  
carboxylate *cis*-S7**

**3a-((3-ethoxy-3-oxopropyl)amino)octahydro-2H-isoindole-2-**

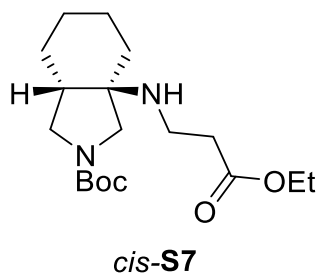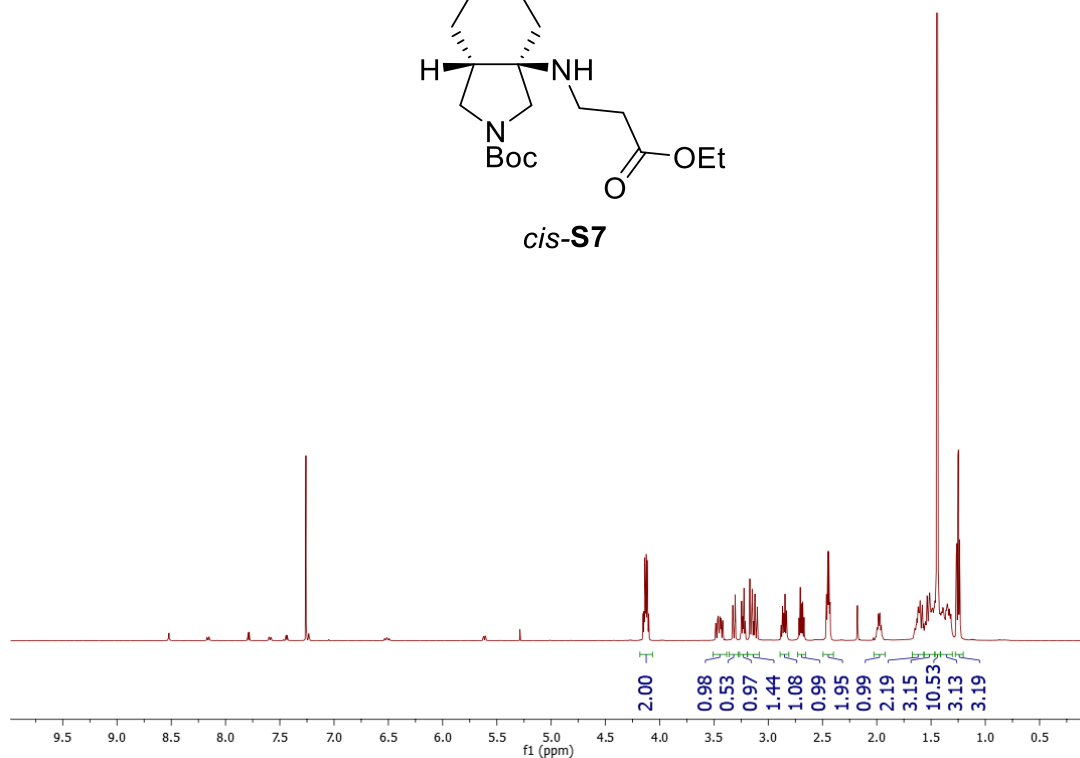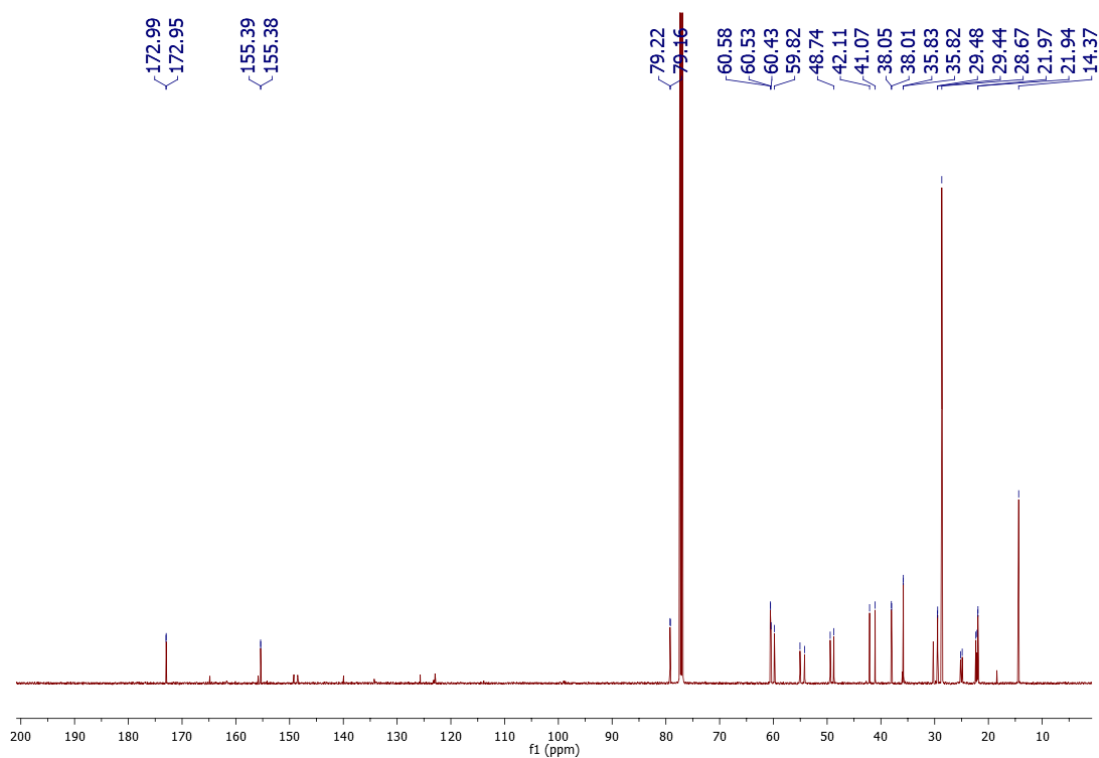

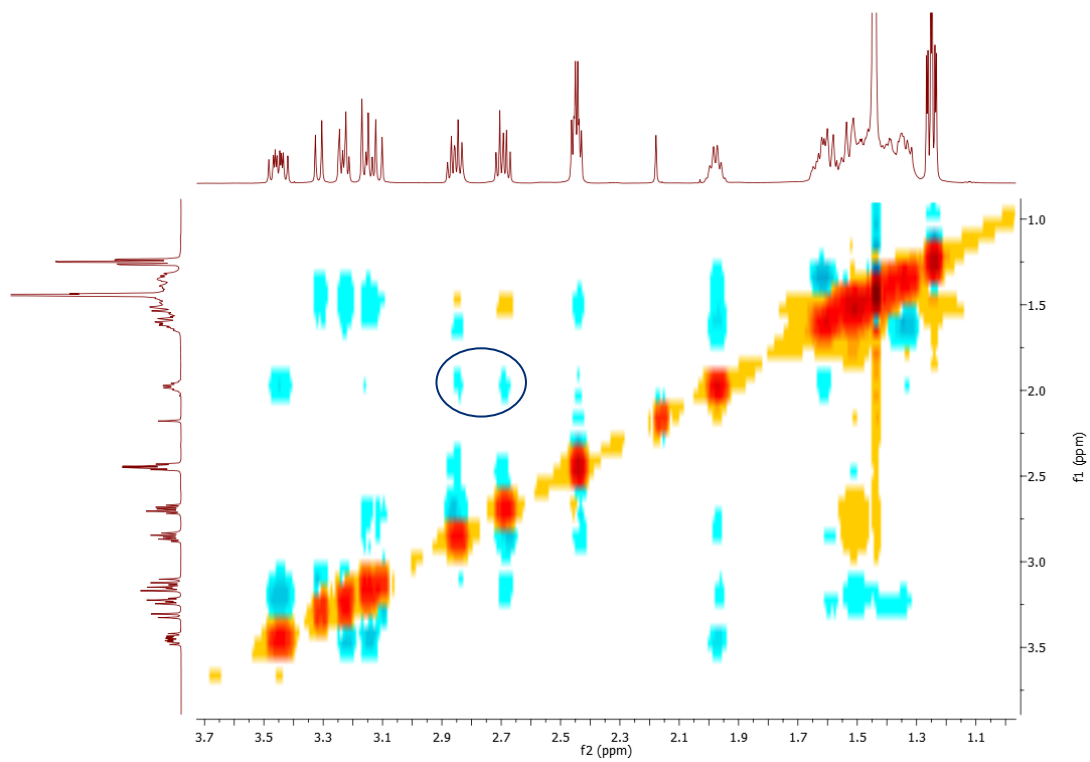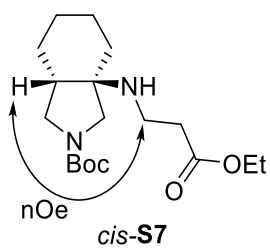

**tert-Butyl 3a-(((benzyloxy)carbonyl)(3-ethoxy-3-oxopropyl)amino)octahydro-2H-isoindole-2-carboxylate *cis*-9e**

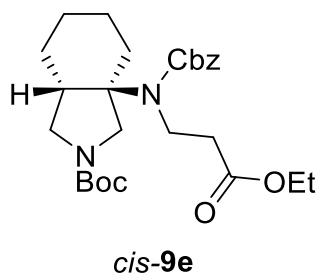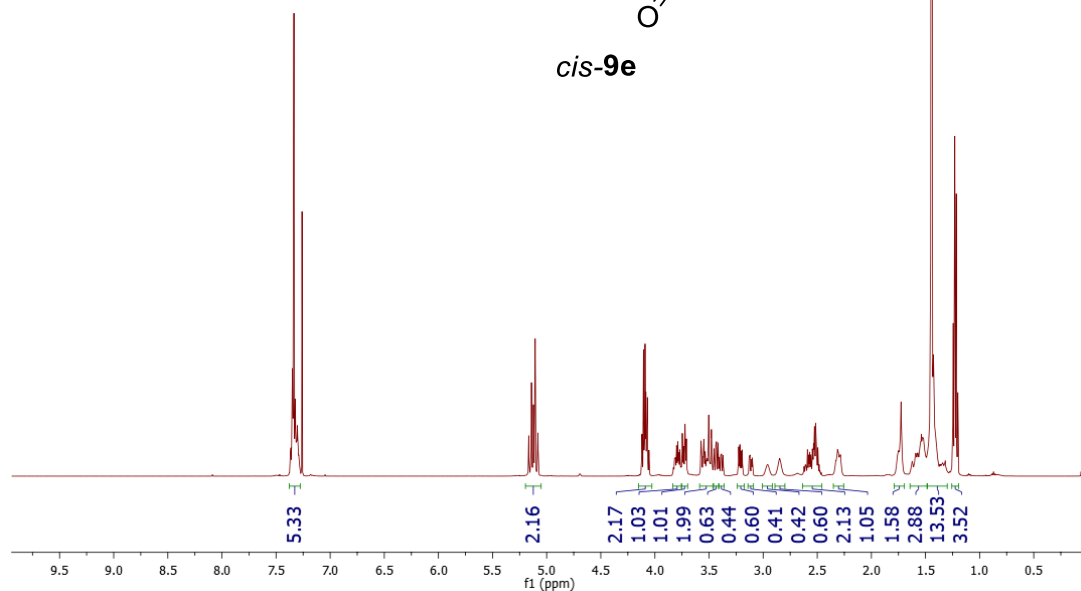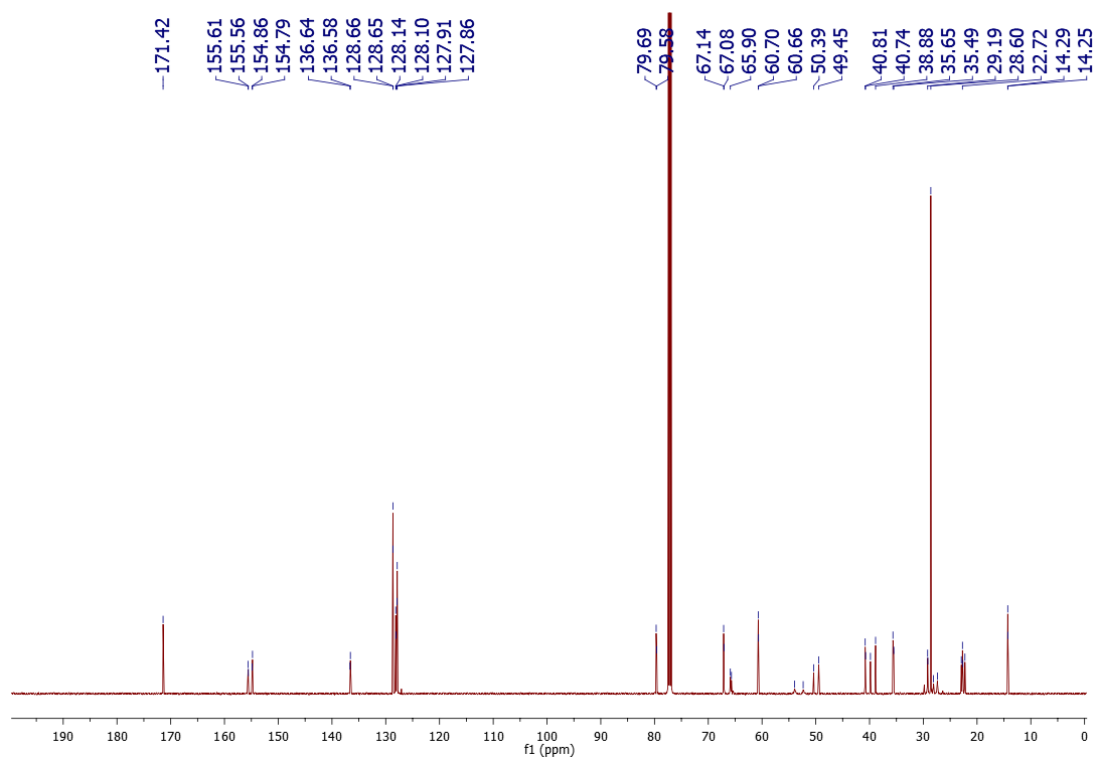

**Benzyl (6aS\*,10aR\*)-4-oxooctahydro-5,10a-methanobenzo[b][1,5]diazocine-1(2H)-carboxylate 6e**

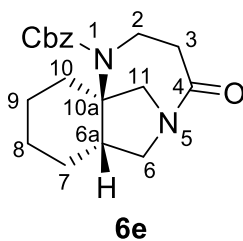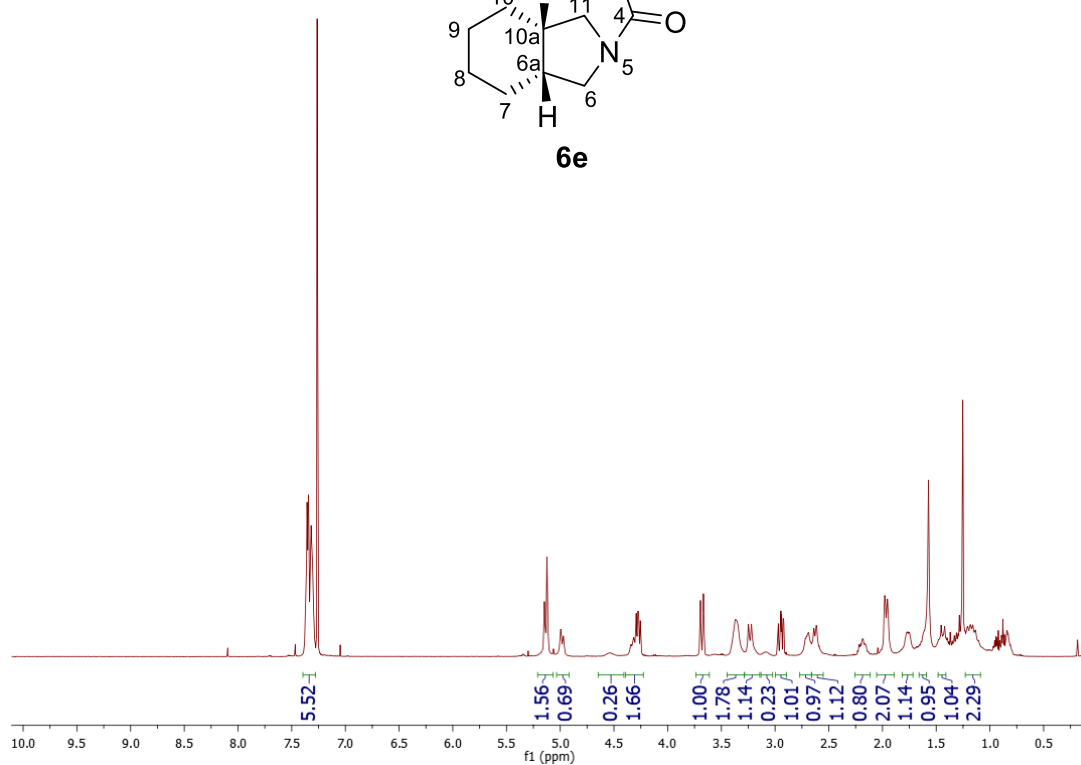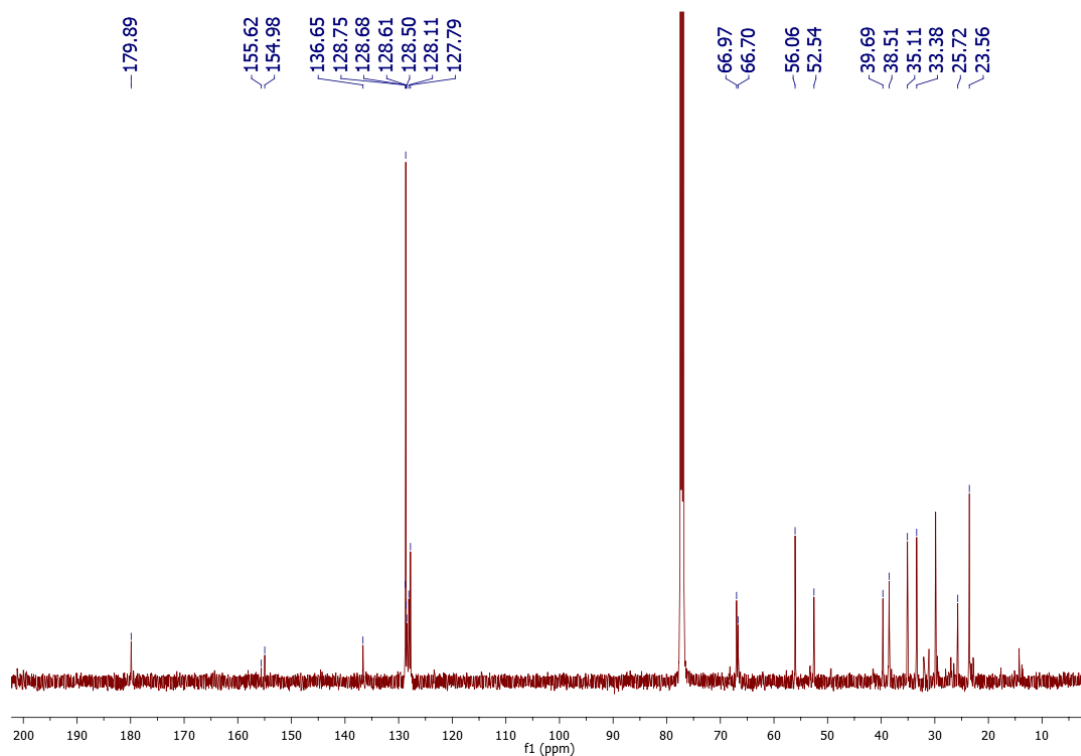

**tert-Butyl 3-((2-ethoxy-2-oxoethyl)amino)piperidine-1-carboxylate S8**

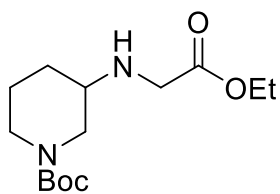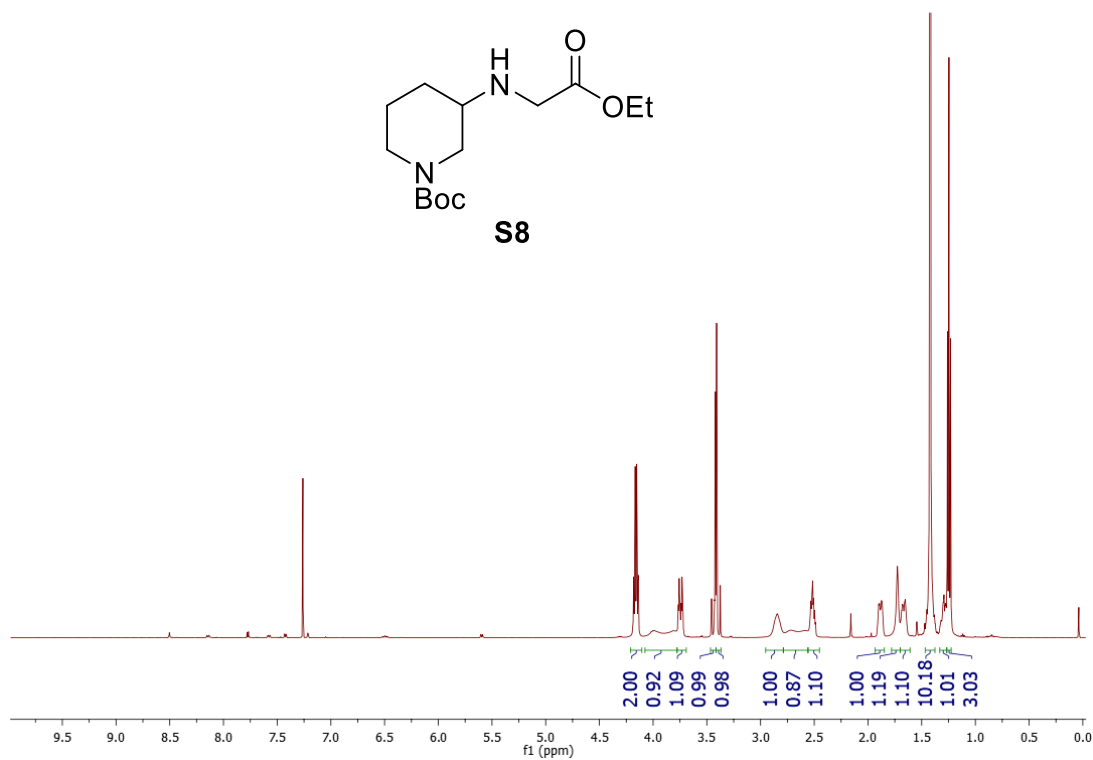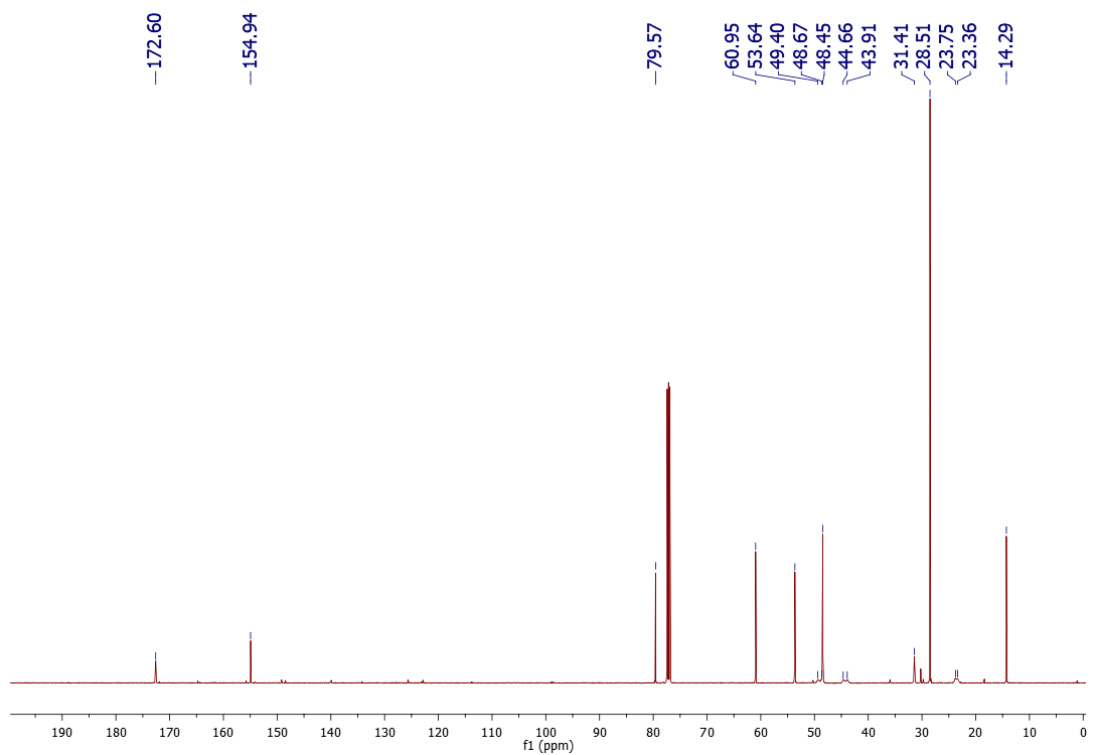

**tert-Butyl 3-(((benzyloxy)carbonyl)(2-ethoxy-2-oxoethyl)amino)piperidine-1-carboxylate 9f**

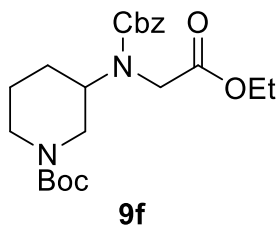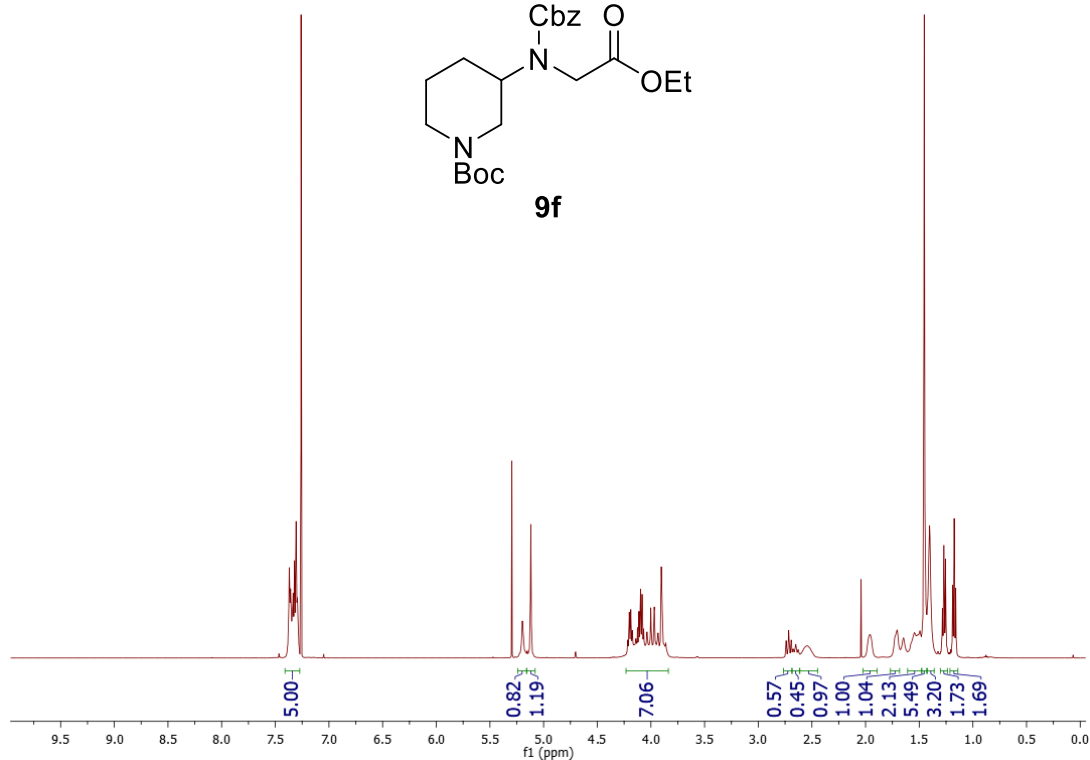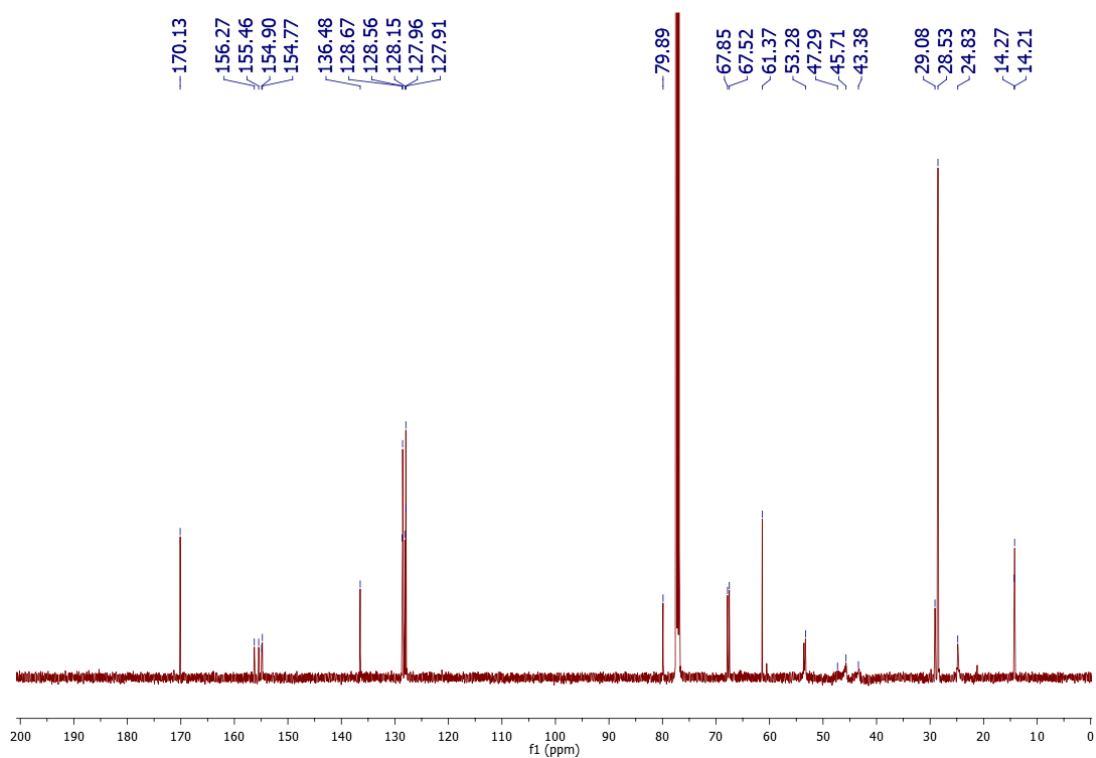

**Benzyl 2-oxo-1,4-diazabicyclo[3.3.1]nonane-4-carboxylate 6f**

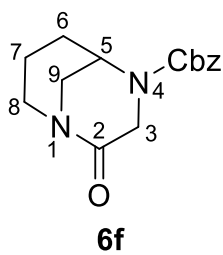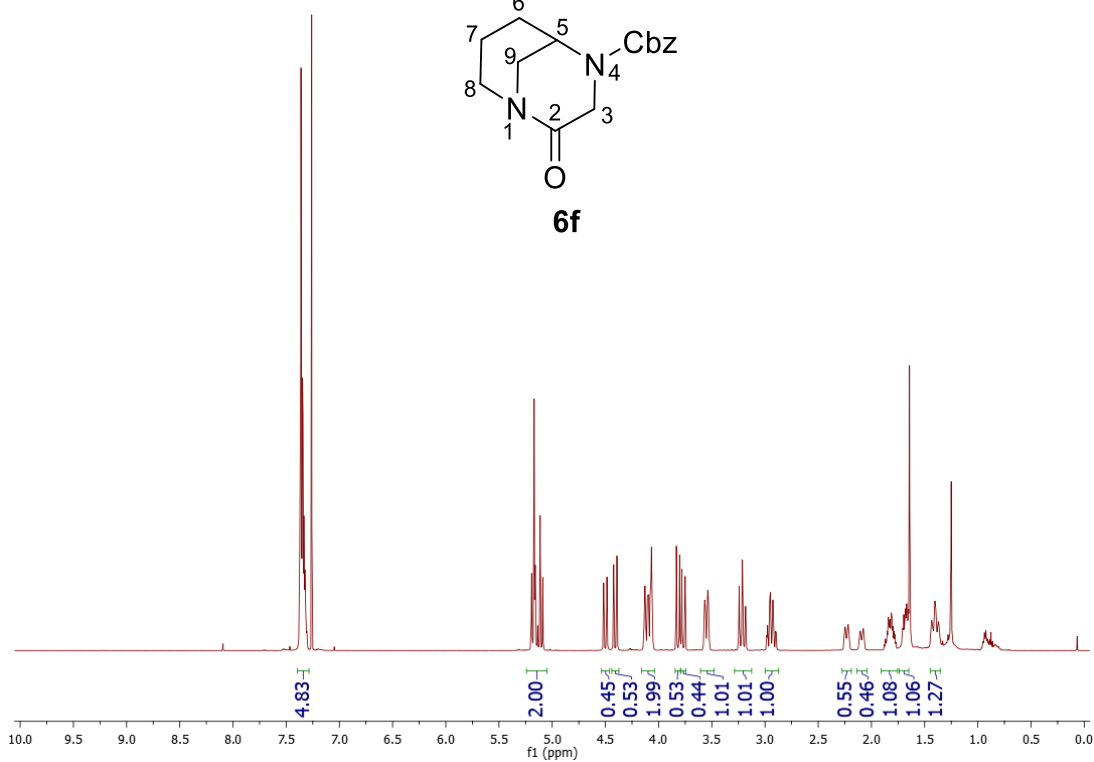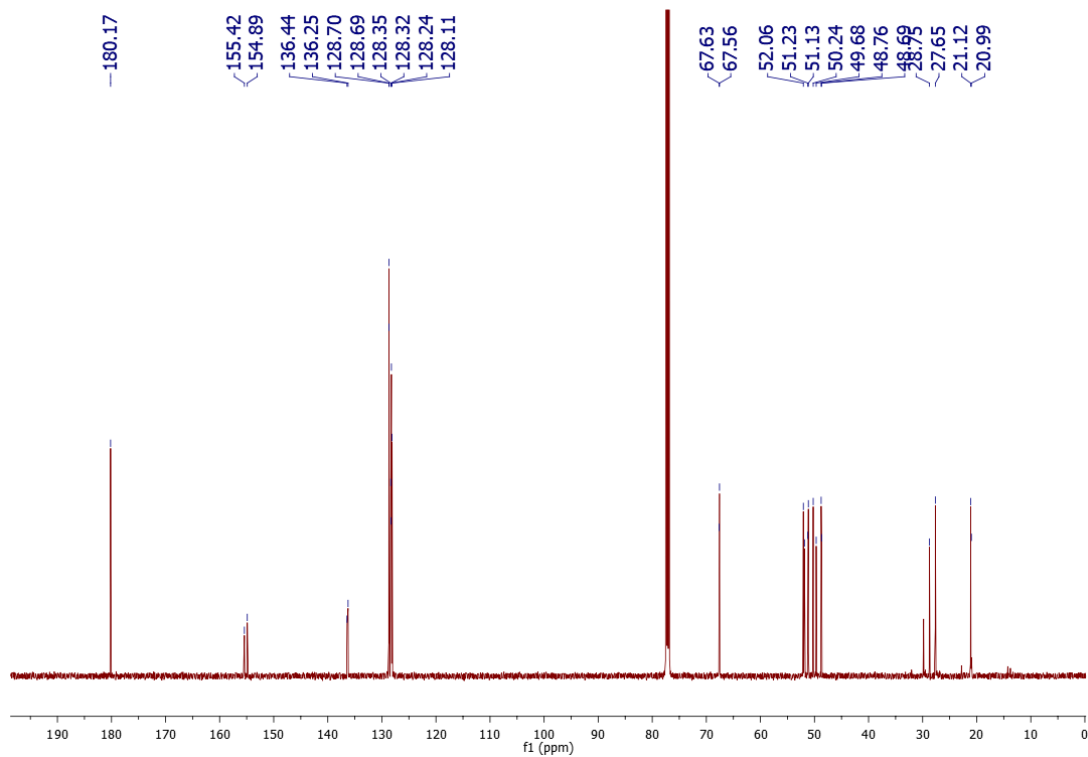

**tert-Butyl 3-((2-ethoxy-2-oxoethyl)((prop-2-yn-1-yloxy)carbonyl)amino)piperidine-1-carboxylate 9g**

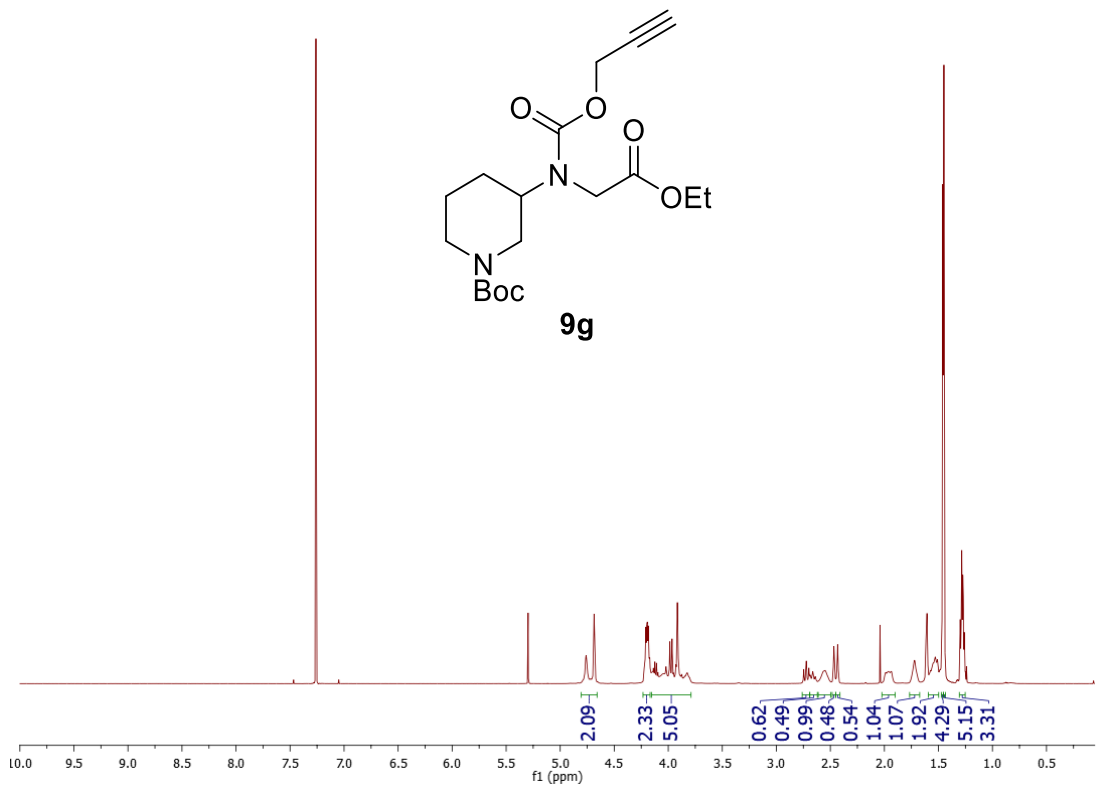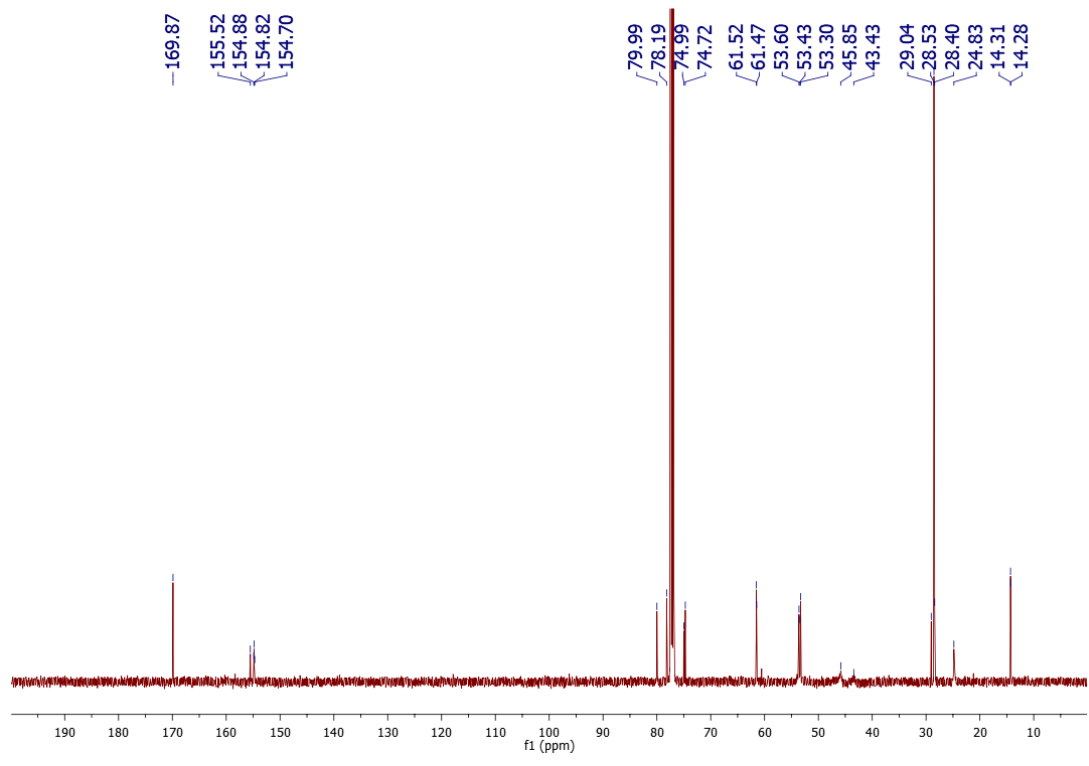



Prop-2-yn-1-yl 2-oxo-1,4-diazabicyclo[3.3.1]nonane-4-carboxylate **6g**

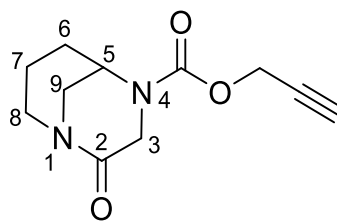

**6g**

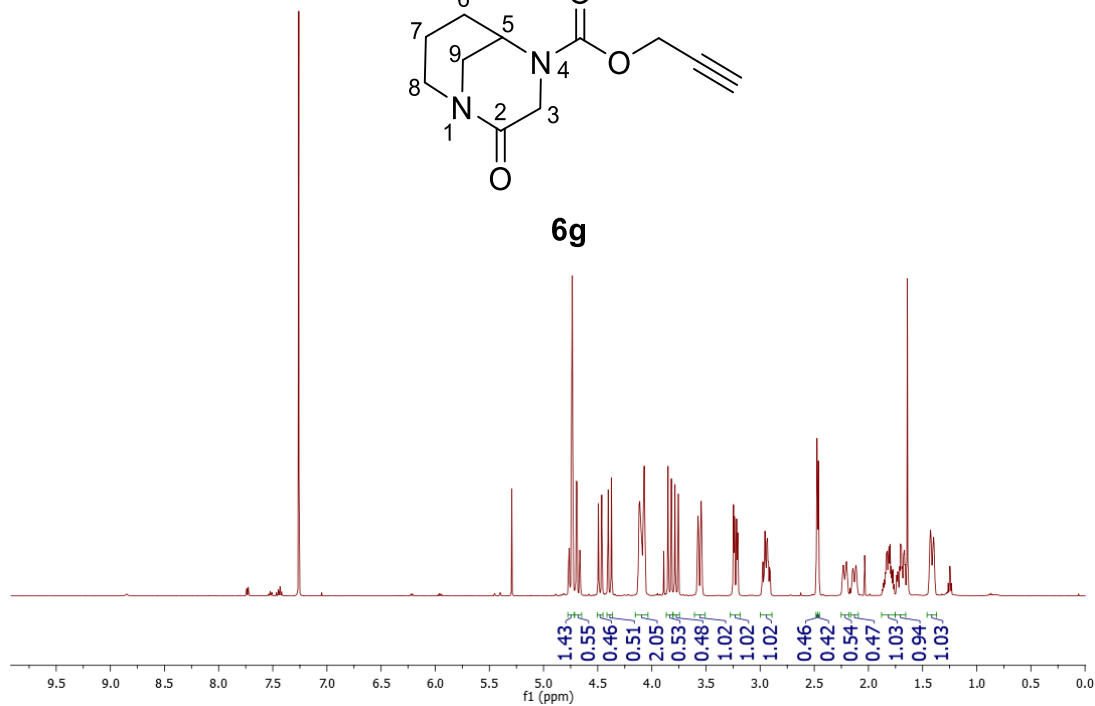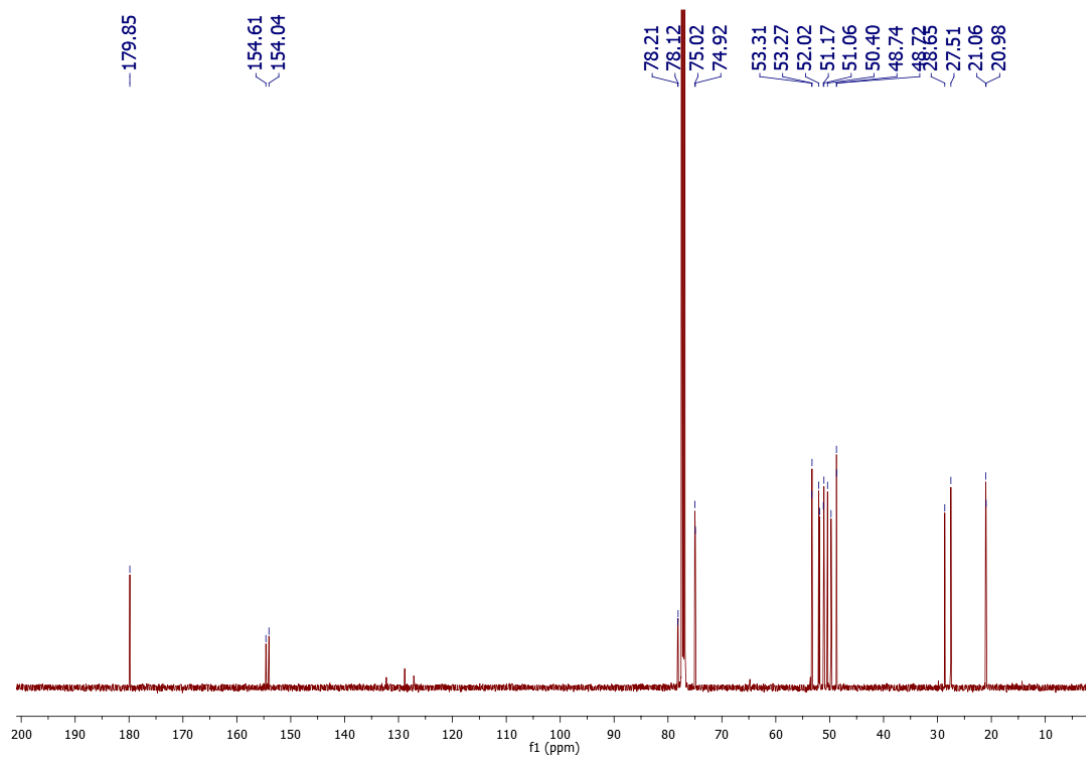

**tert-Butyl 3-(((S)-1-methoxy-1-oxo-3-phenylpropan-2-yl)amino)piperidine-1-carboxylate (S)-S9**

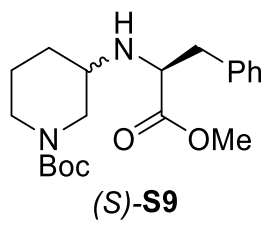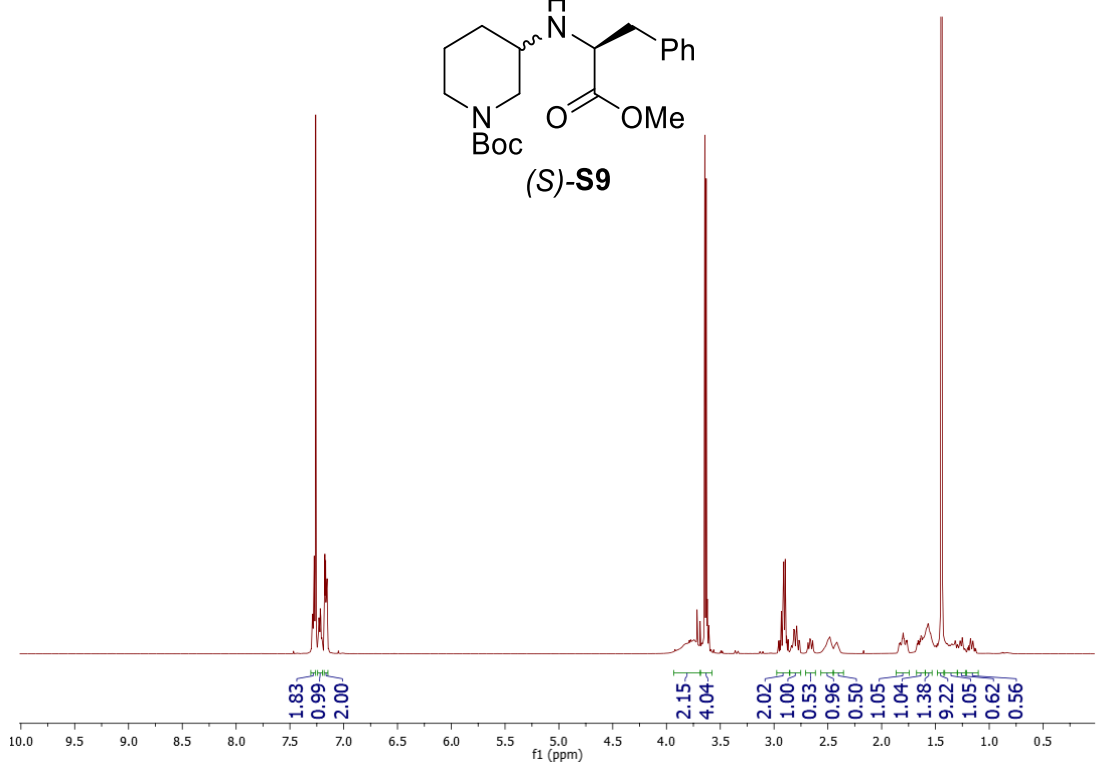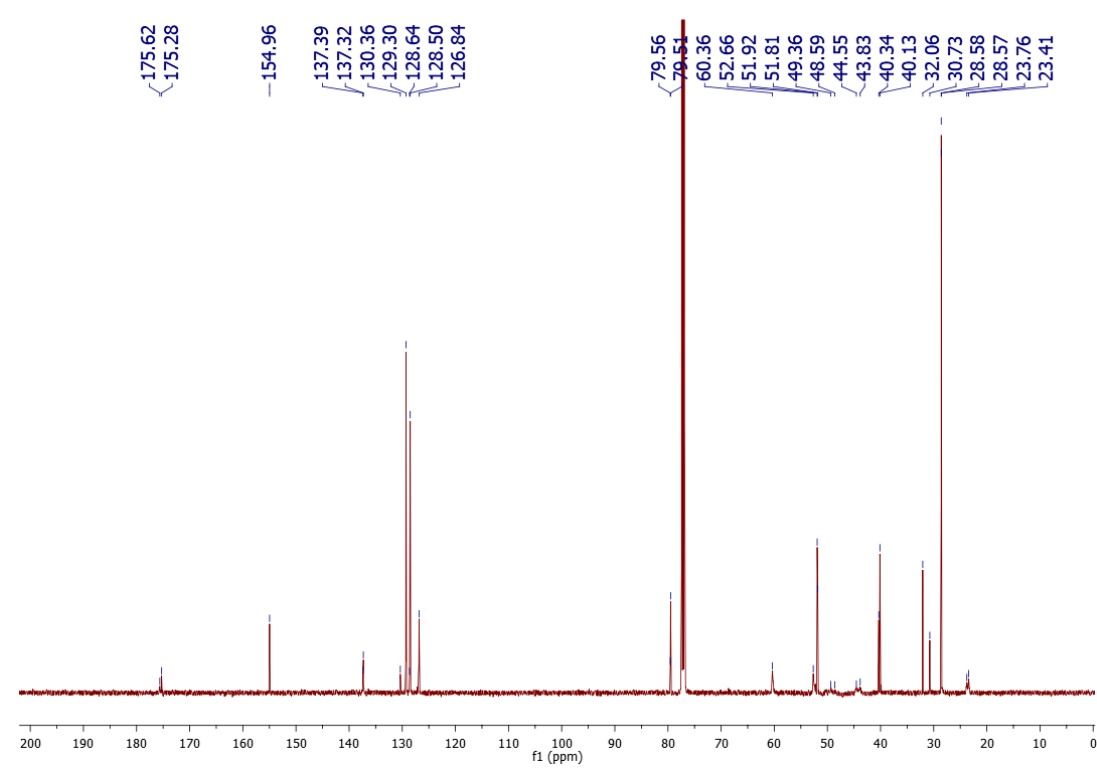

**tert-Butyl 3-(((benzyloxy)carbonyl)((S)-1-methoxy-1-oxo-3-phenylpropan-2-yl)amino)piperidine-1-carboxylate (S)-9h**

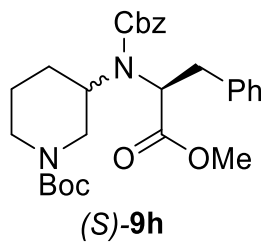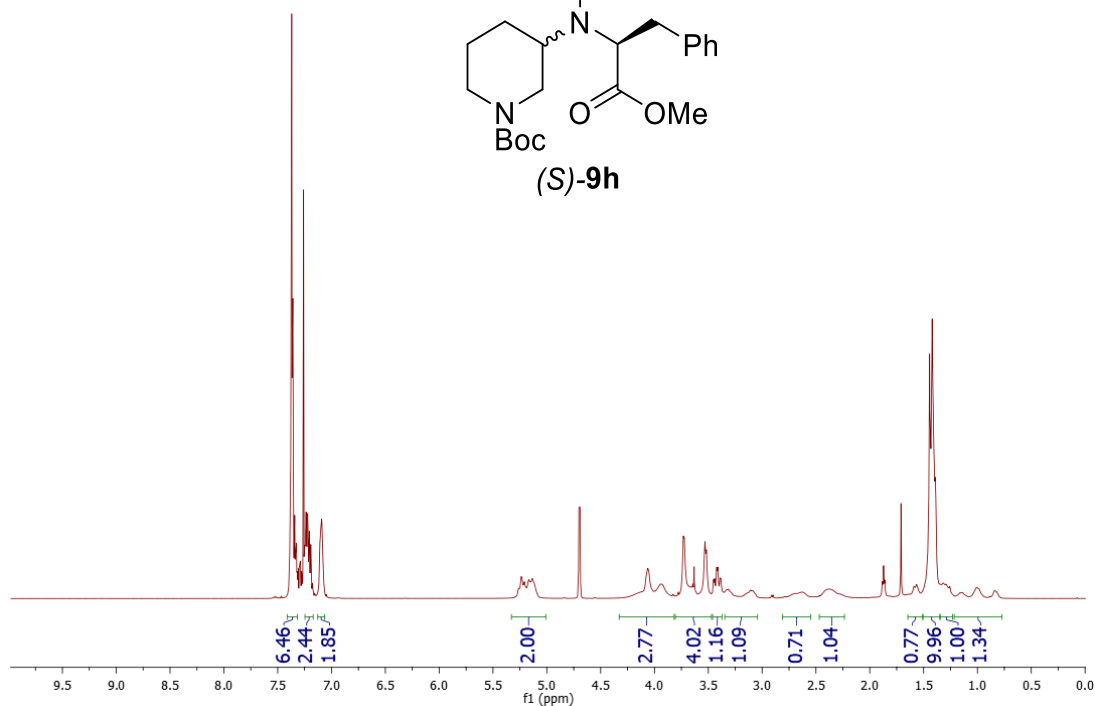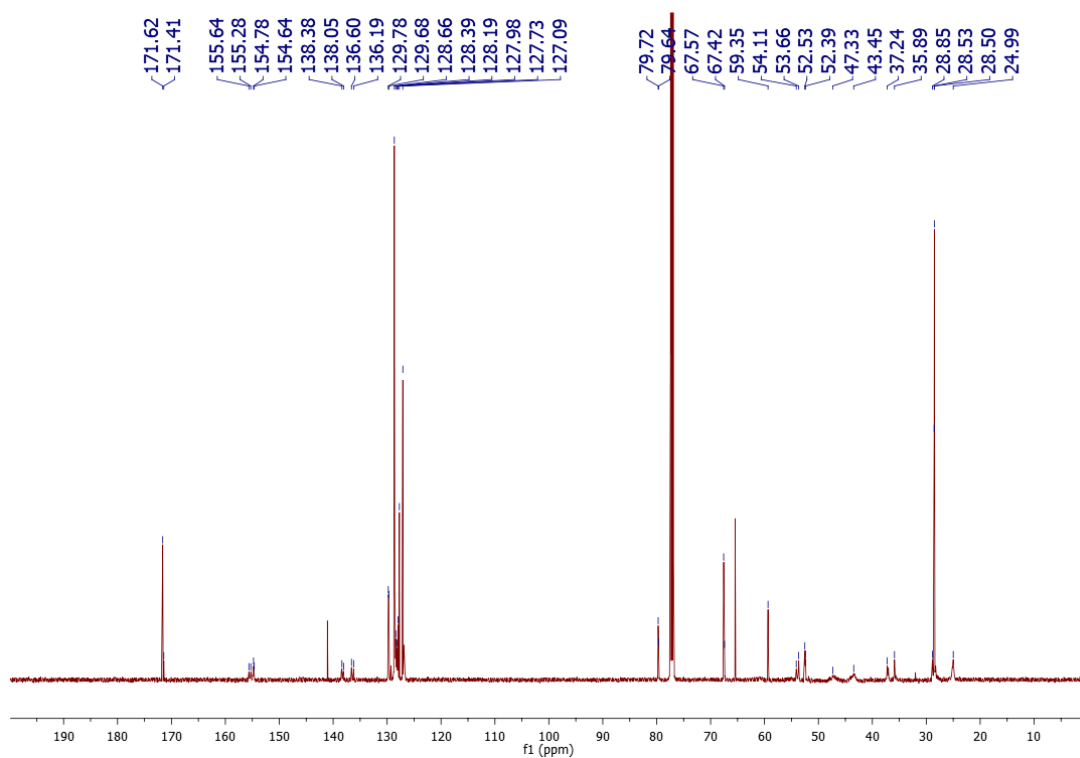

**Benzyl (3*S*,5*S*)-3-benzyl-2-oxo-1,4-diazabicyclo[3.3.1]nonane-4-carboxylate (*S,S*)-6h**

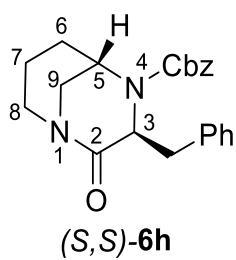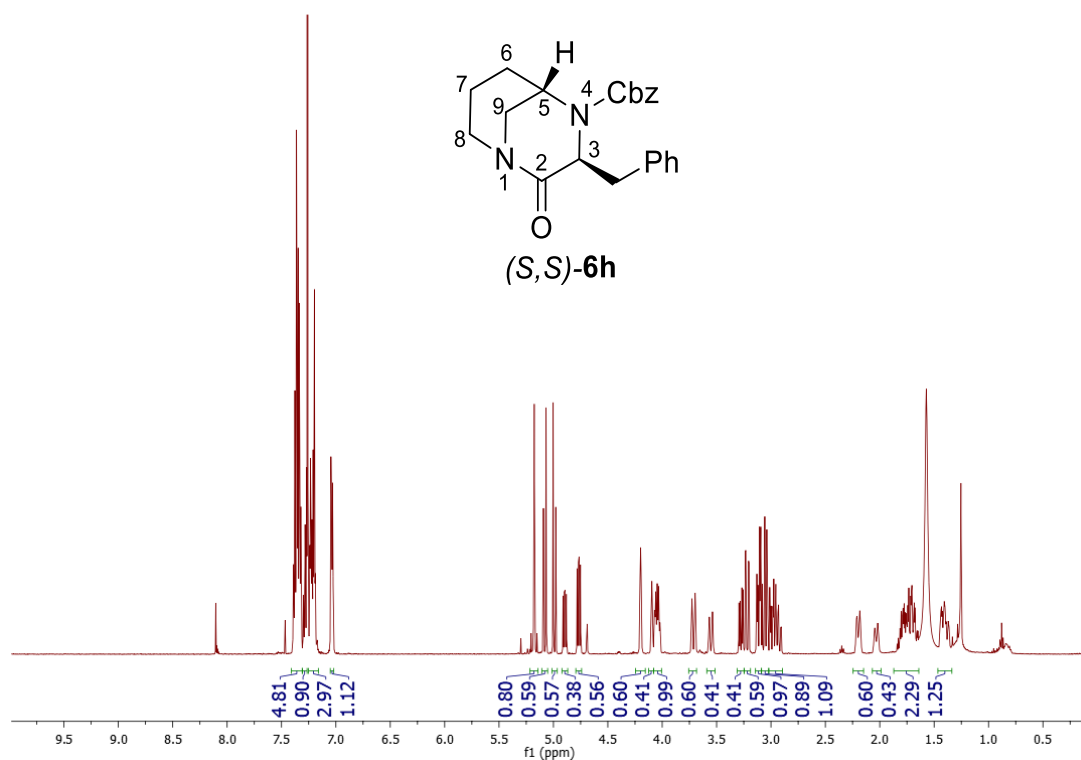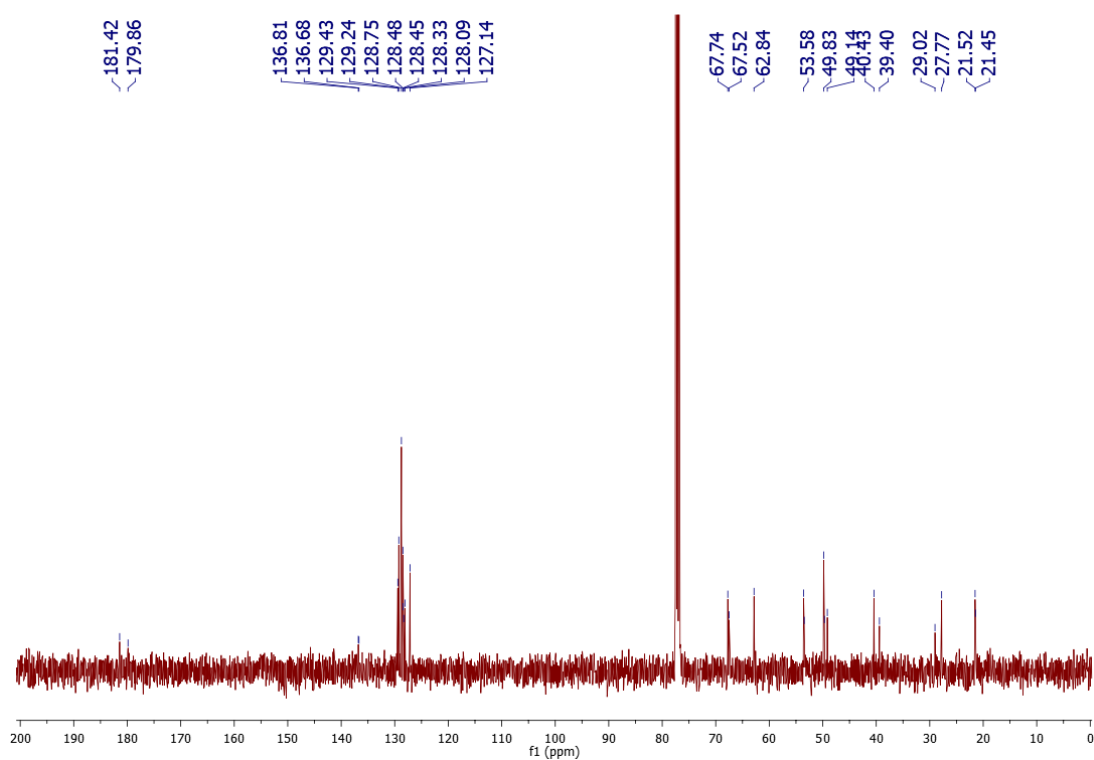

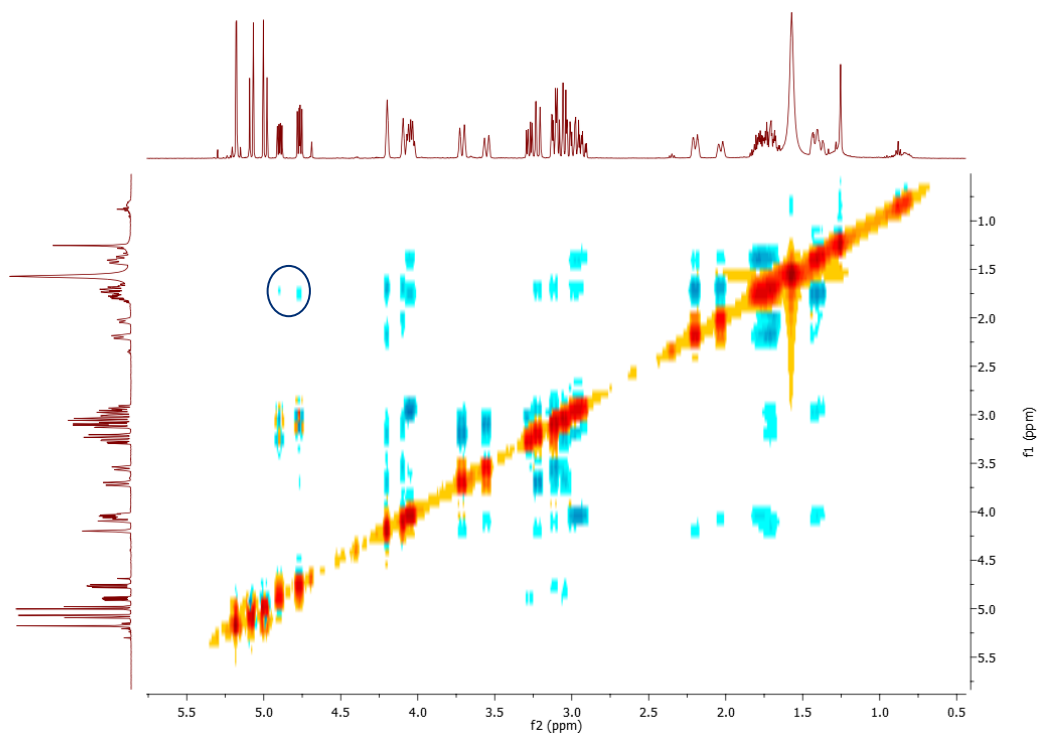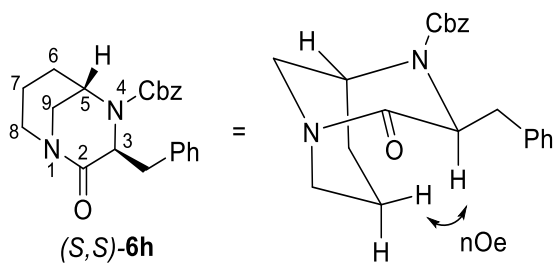

**tert-Butyl 3-((2-ethoxy-2-oxoethyl)amino)-3-methylpiperidine-1-carboxylate S10**

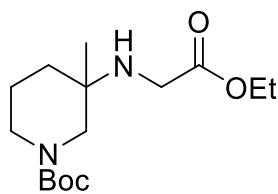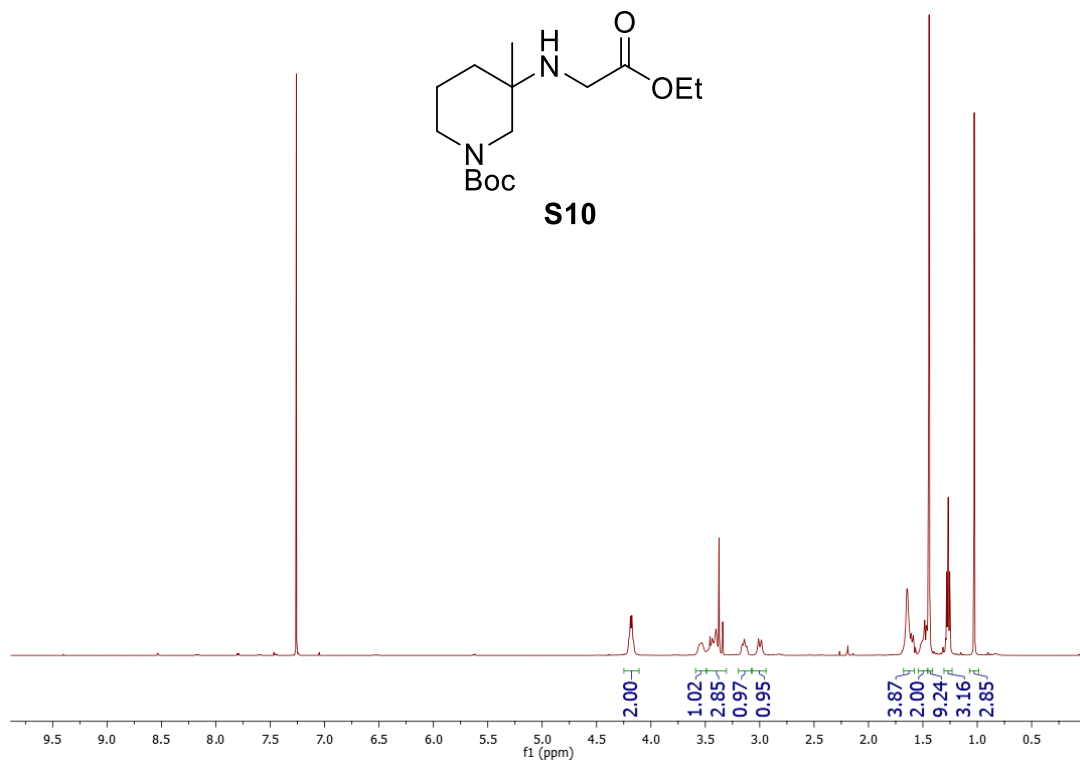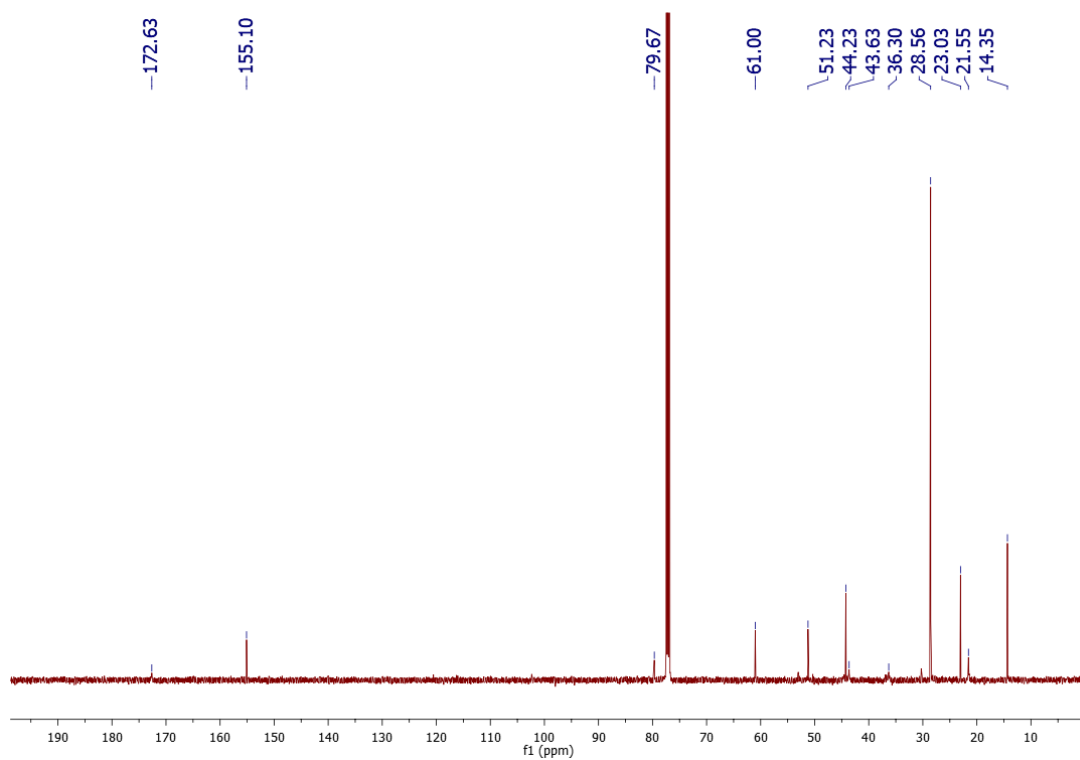

**tert-Butyl 3-(((benzyloxy)carbonyl)(2-ethoxy-2-oxoethyl)amino)-3-methylpiperidine-1-carboxylate 9i**

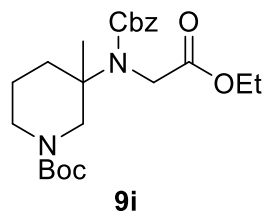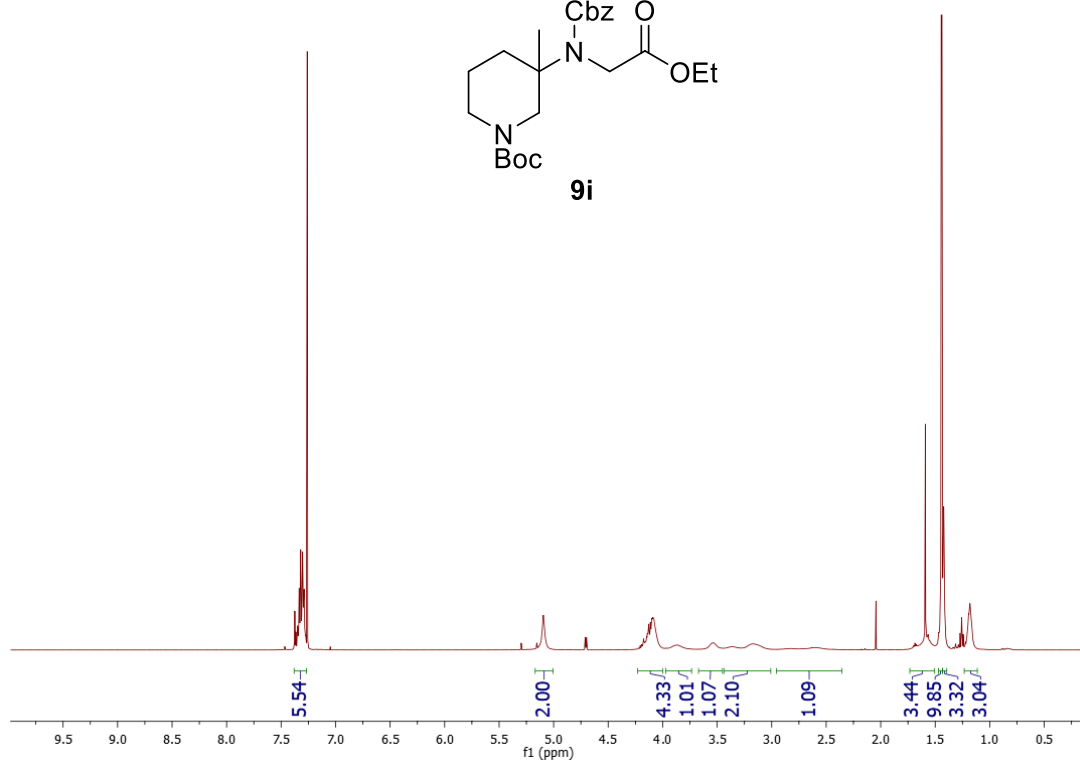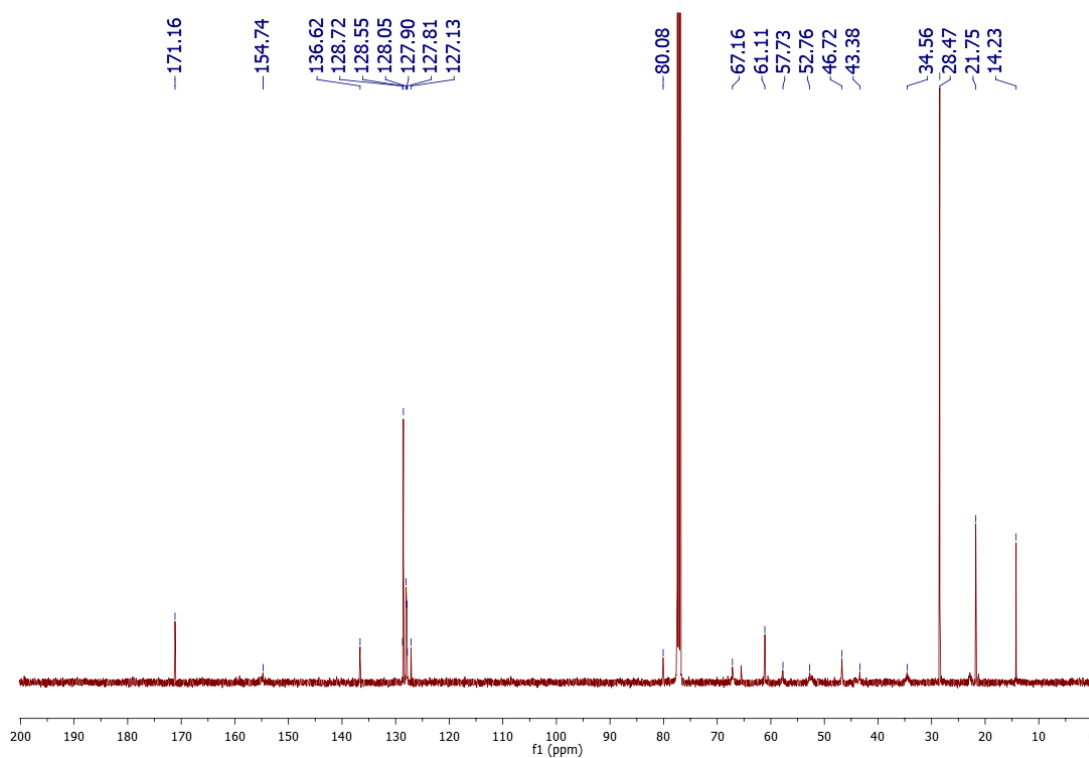

# Benzyl 5-methyl-2-oxo-1,4-diazabicyclo[3.3.1]nonane-4-carboxylate 6i

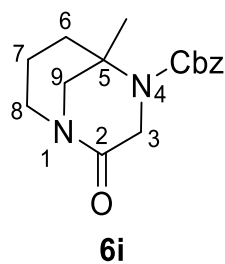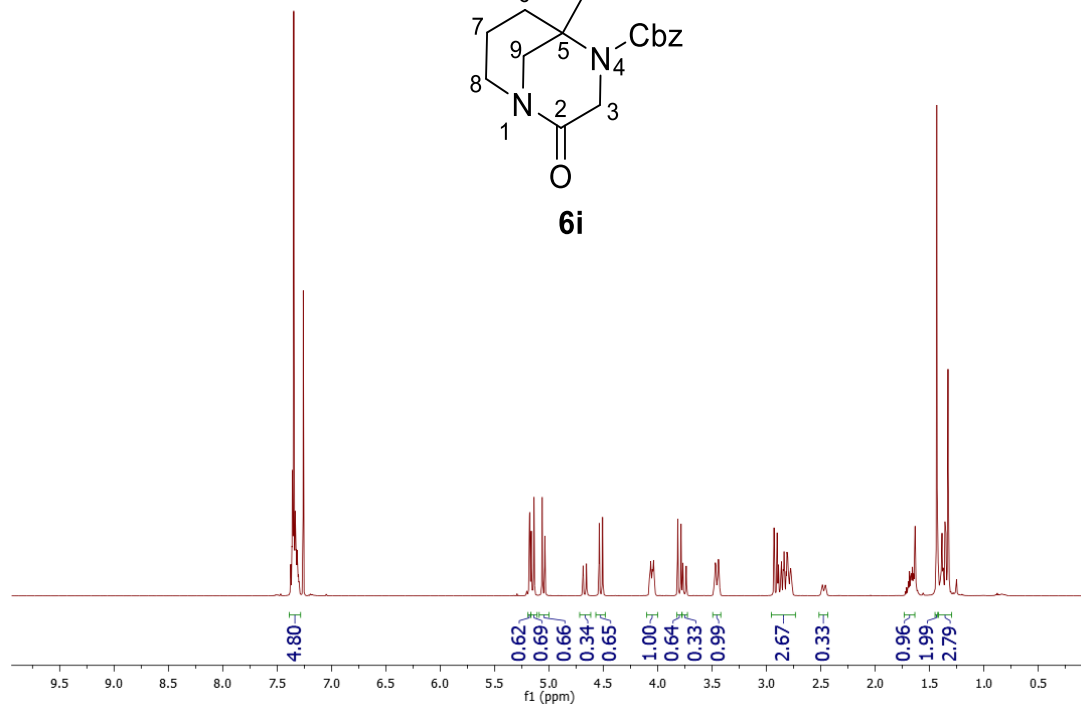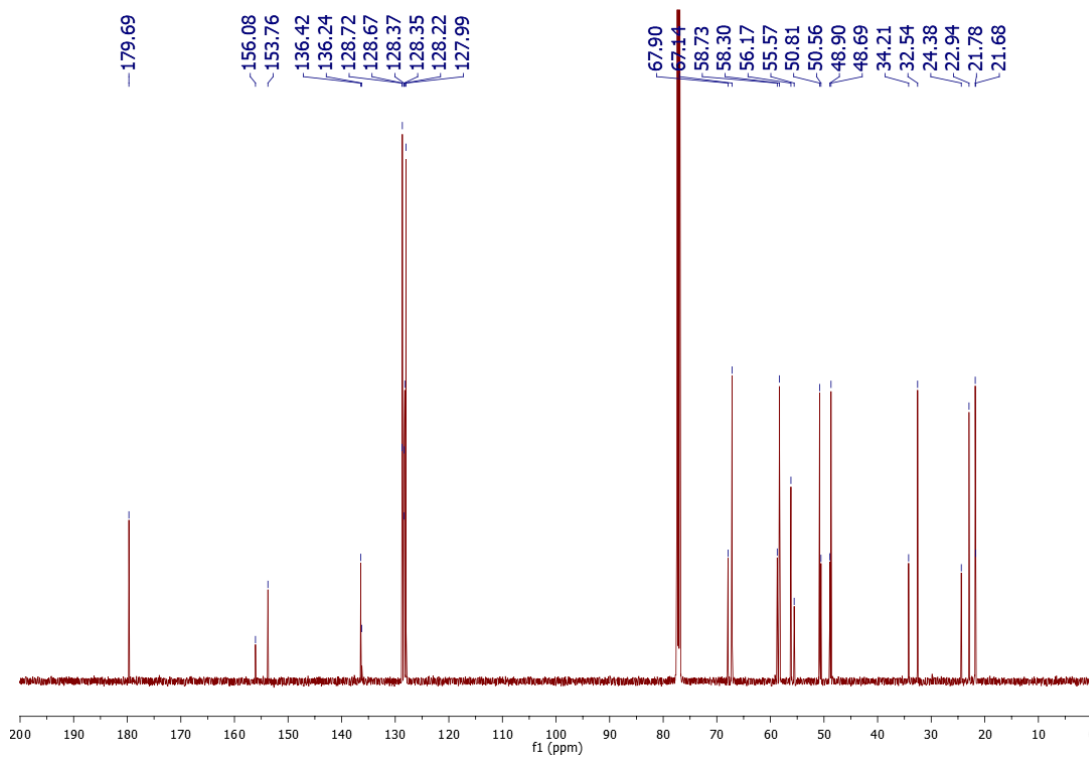



**tert-Butyl 3-((2-ethoxy-2-oxoethyl)amino)azepane-1-carboxylate S11**

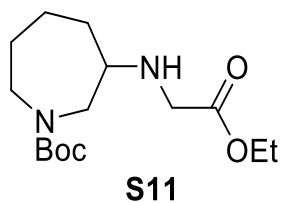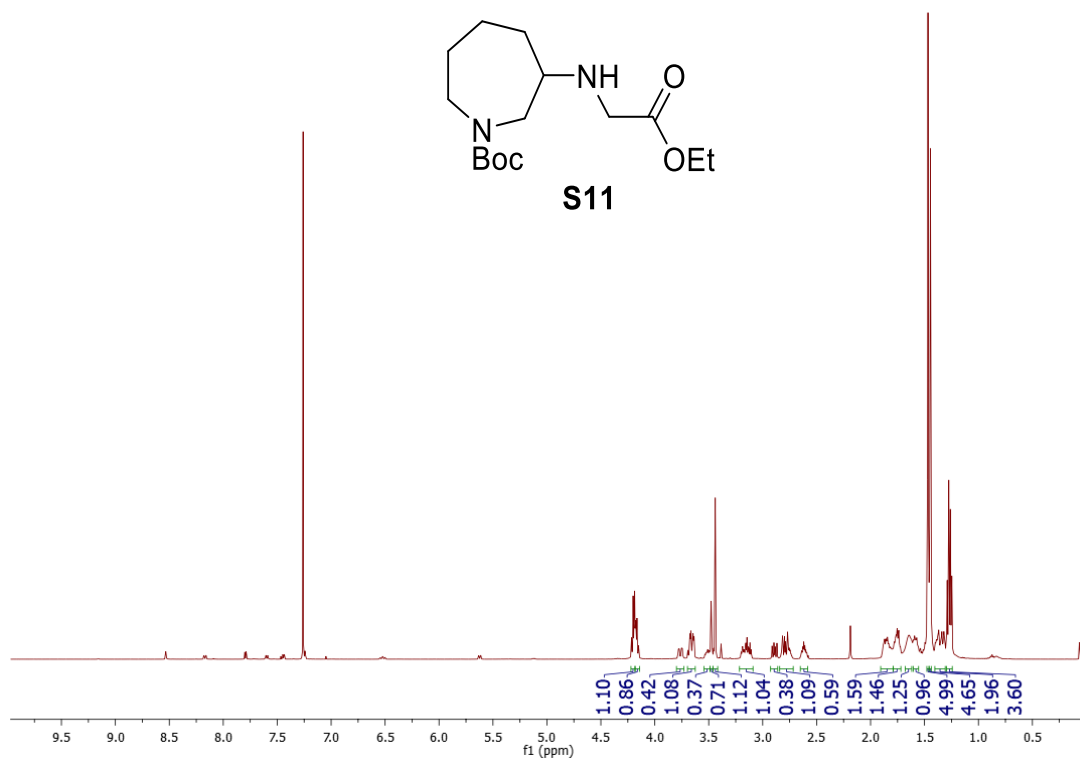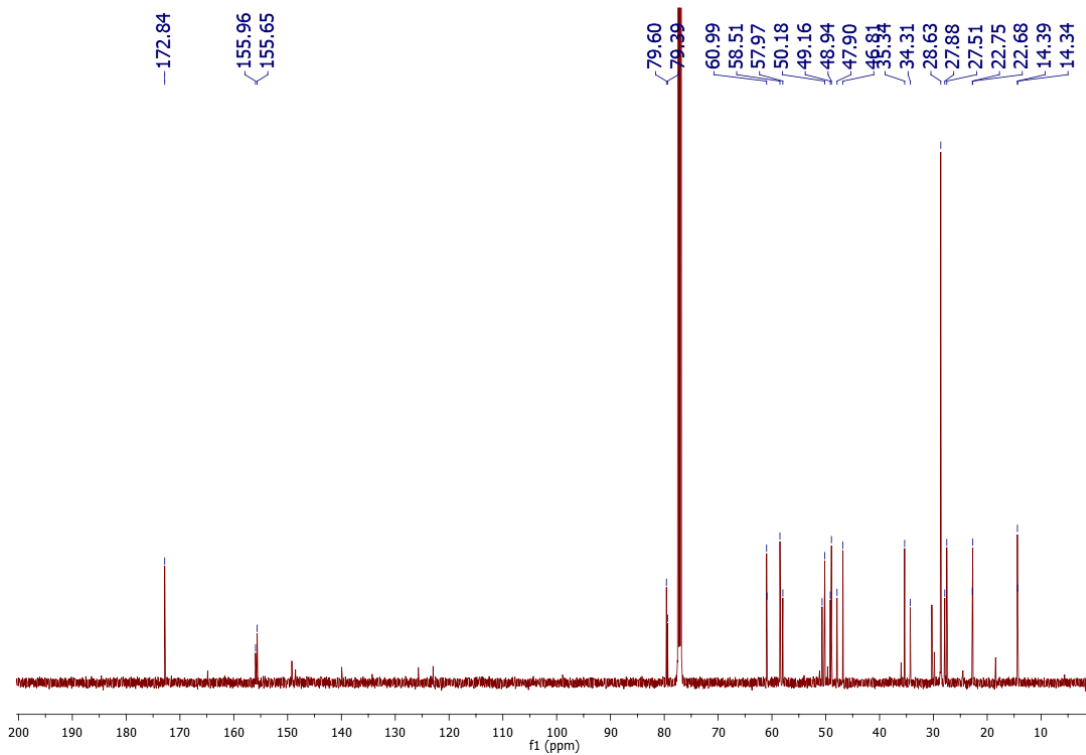

*tert*-Butyl  
carboxylate 9j

3-(((benzyloxy)carbonyl)(2-ethoxy-2-oxoethyl)amino)azepane-1-

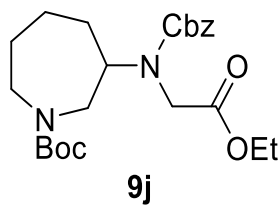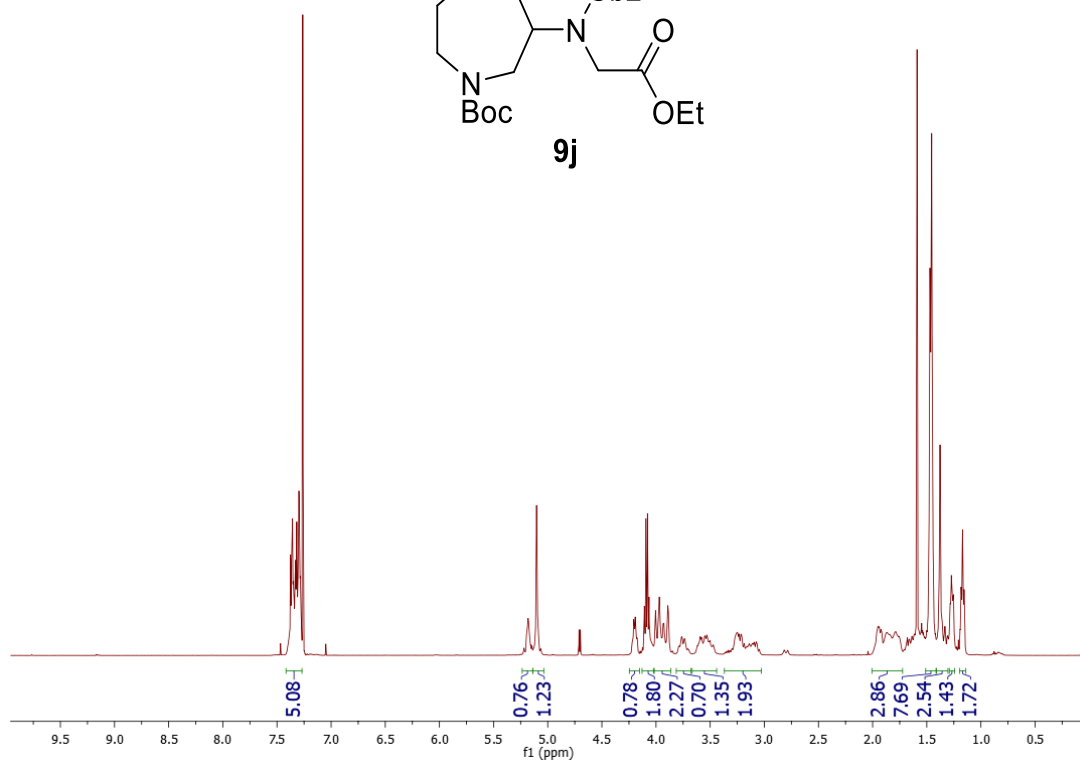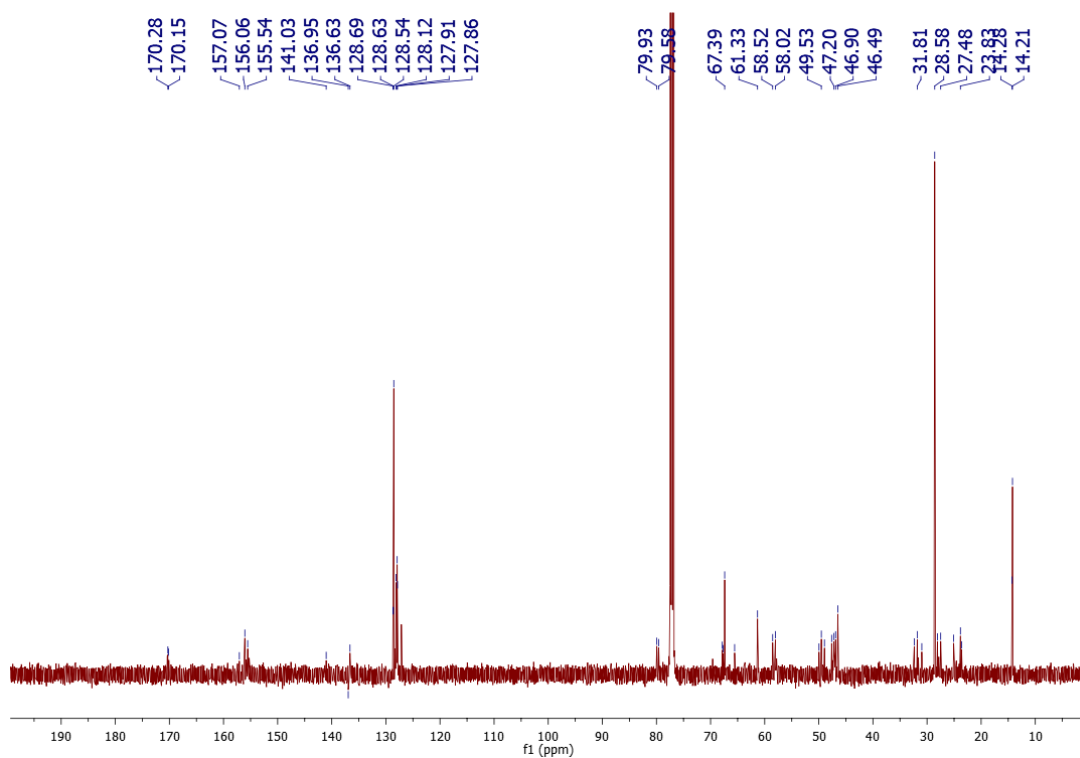

# Benzyl 9-oxo-1,7-diazabicyclo[4.3.1]decane-7-carboxylate 6j

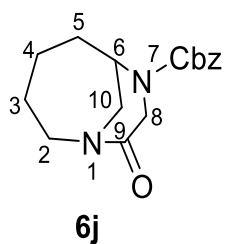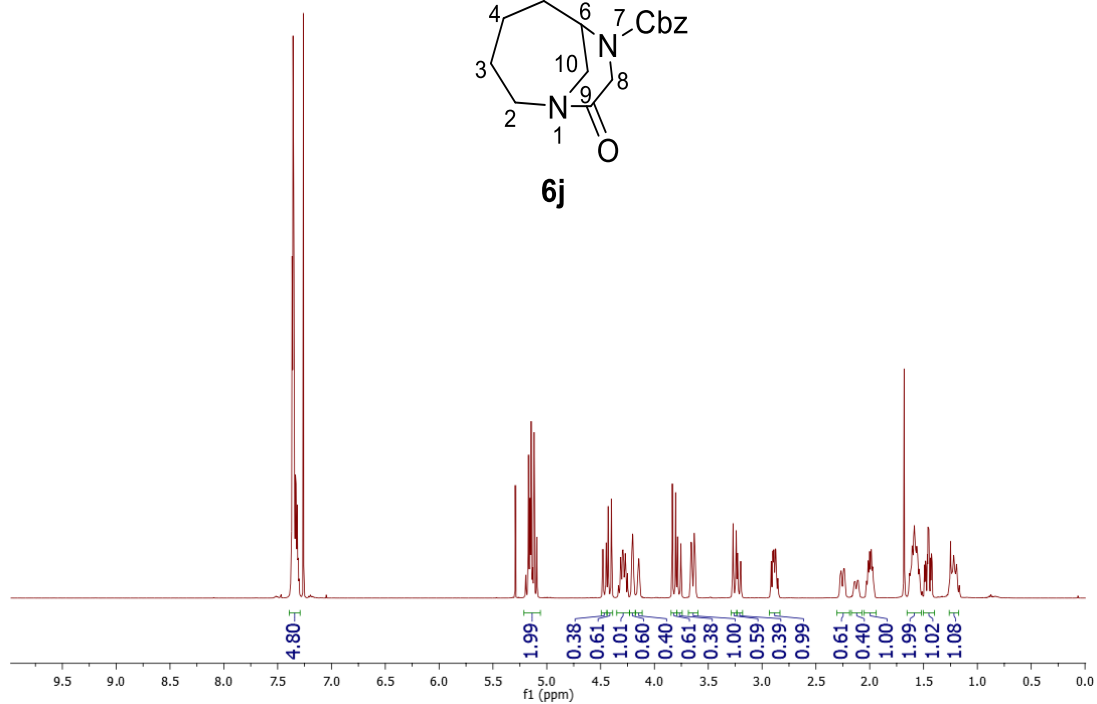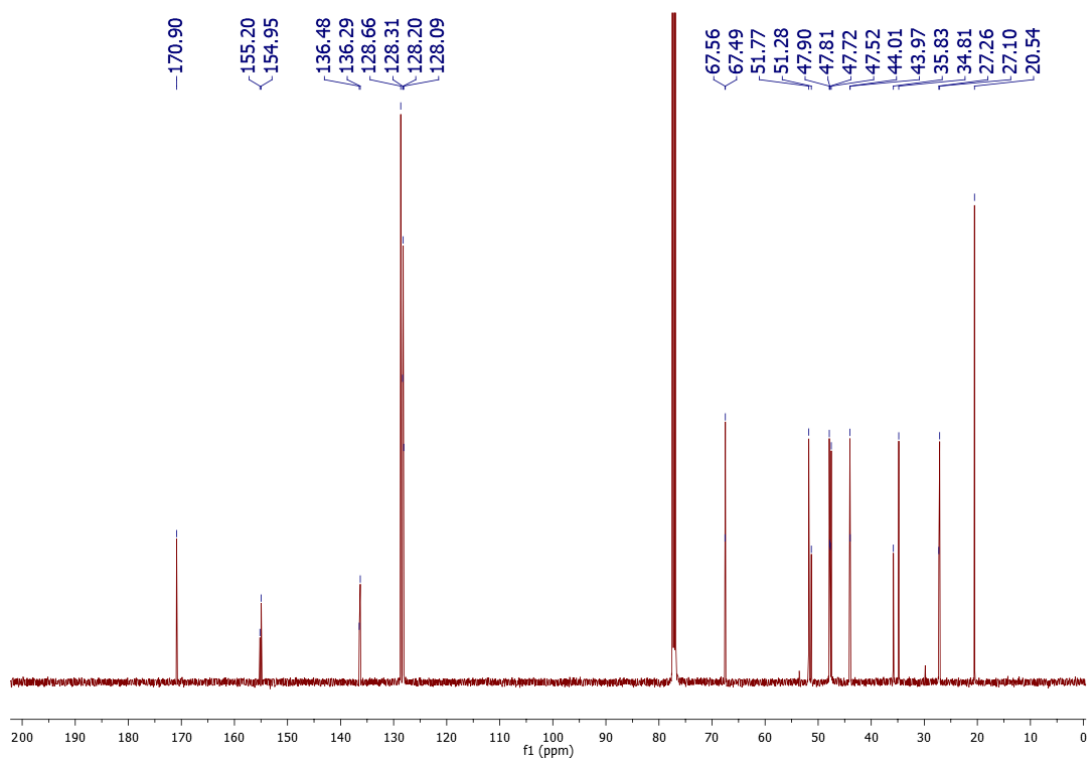

***tert*-Butyl 3-((3-ethoxy-3-oxopropyl)amino)piperidine-1-carboxylate S12**

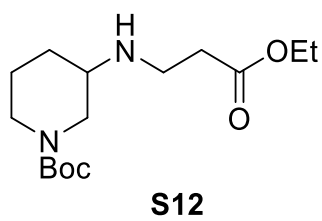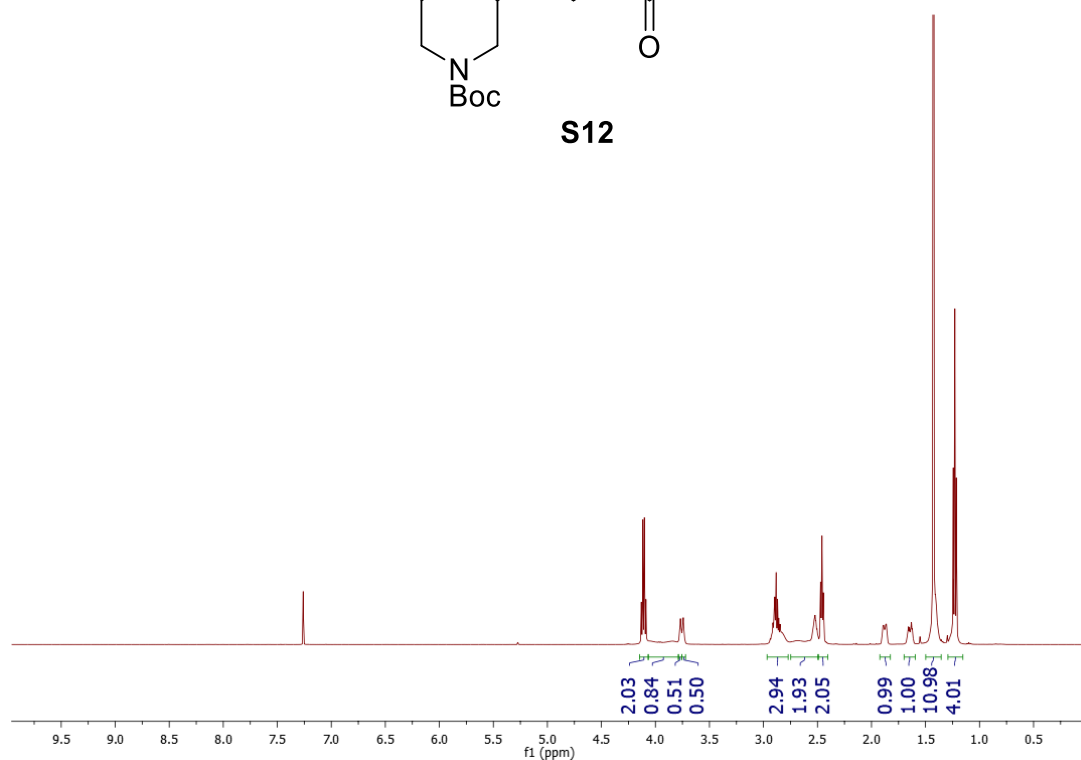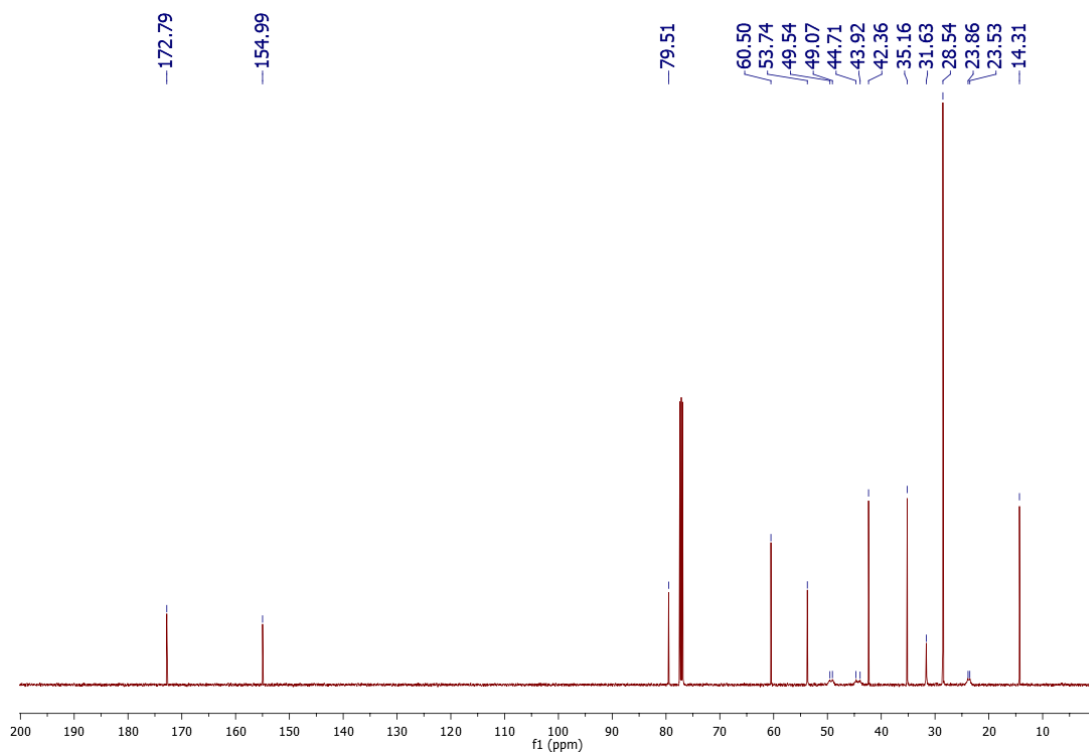

**tert-Butyl 3-(((benzyloxy)carbonyl)(3-ethoxy-3-oxopropyl)amino)piperidine-1-carboxylate 9k**

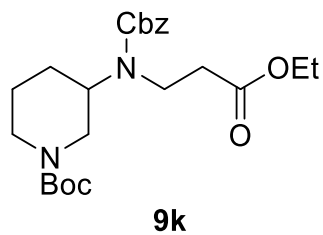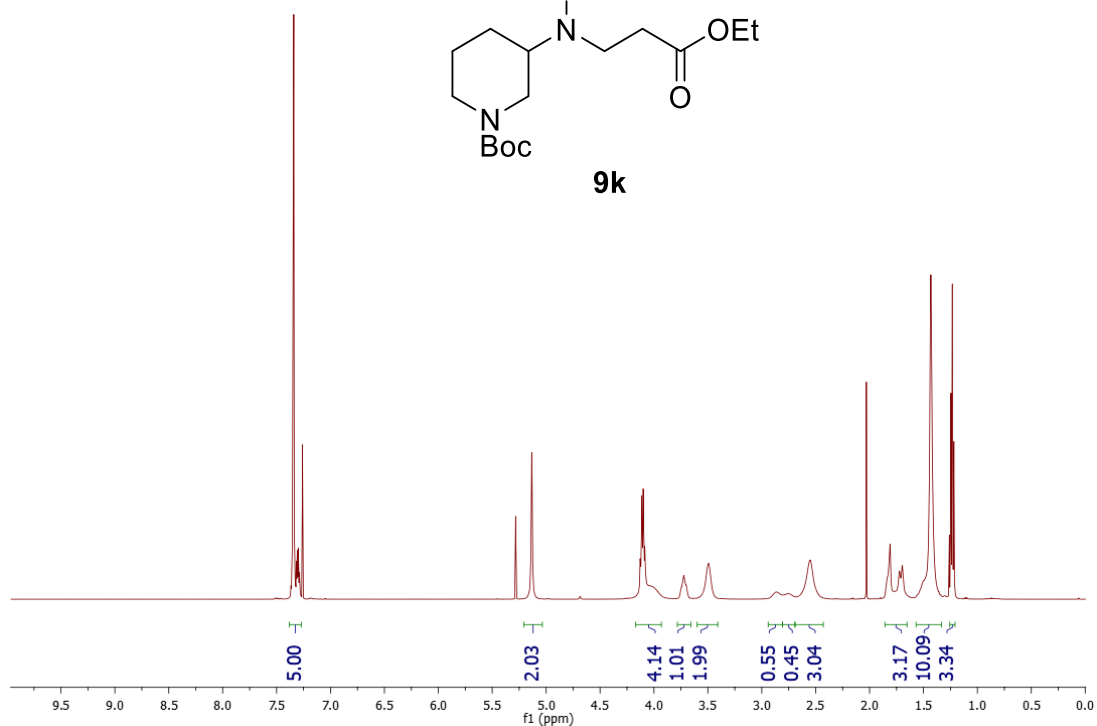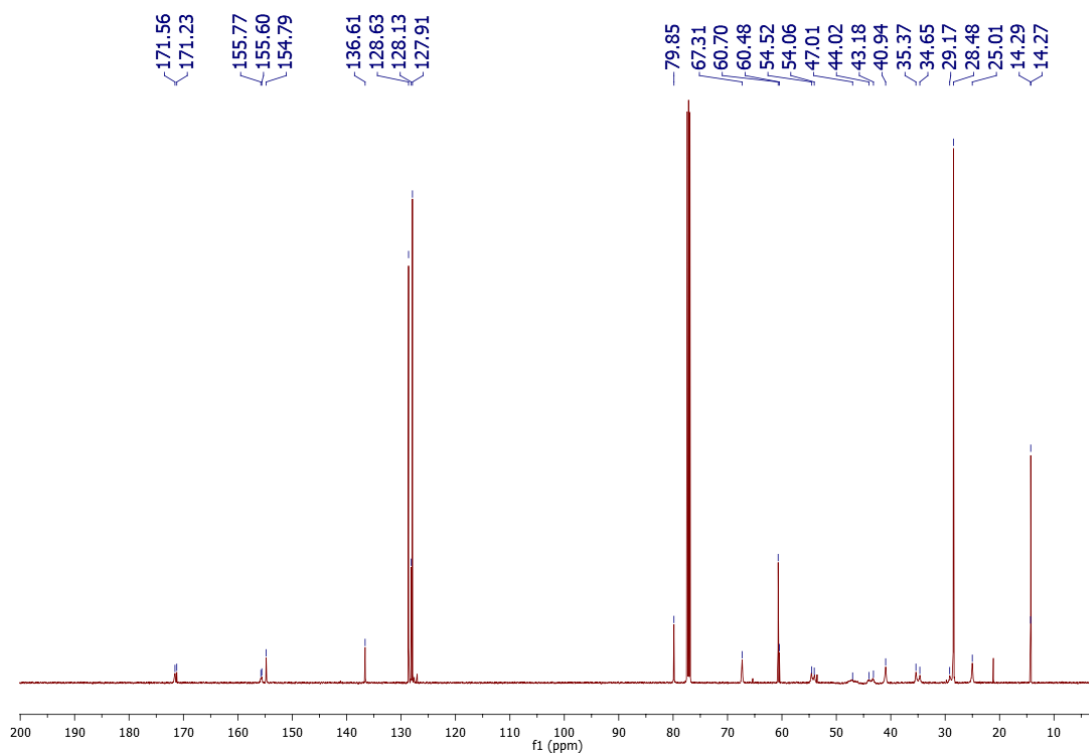

# Benzyl 2-oxo-1,5-diazabicyclo[4.3.1]decane-5-carboxylate 6k

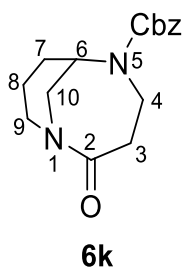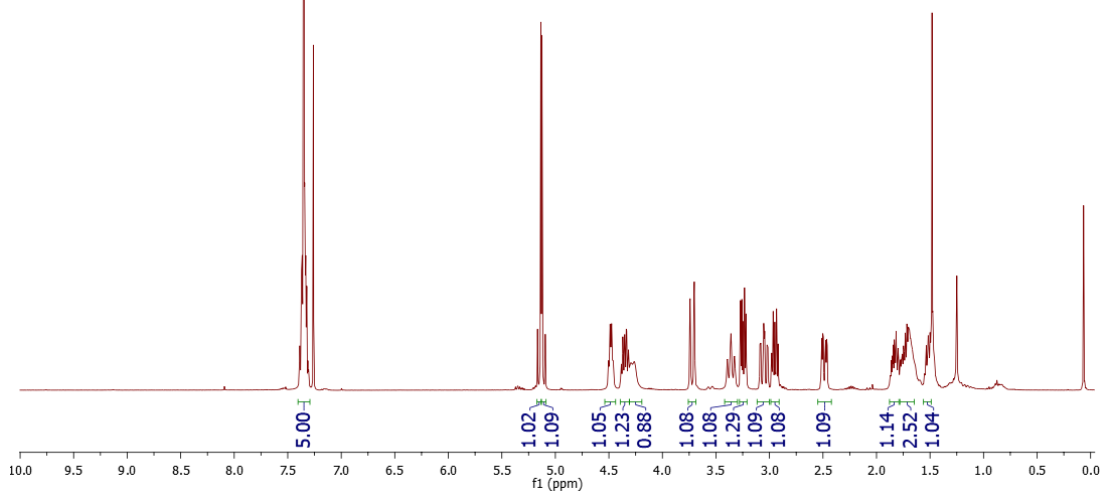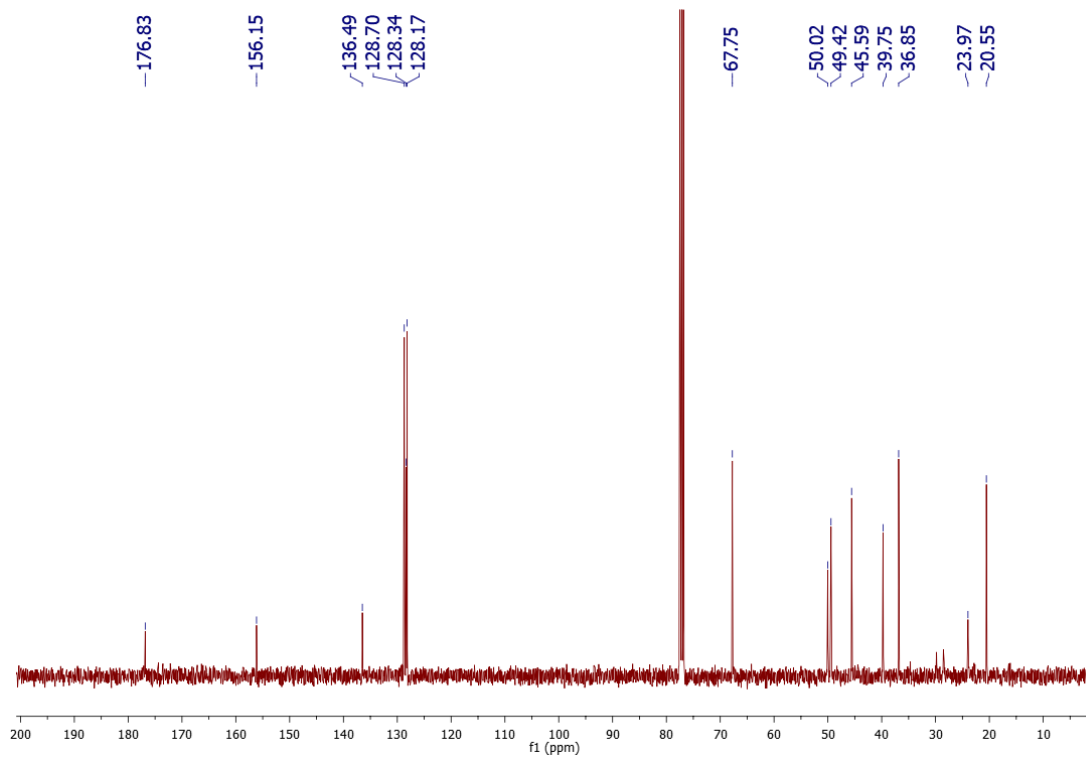

**tert-Butyl 3-((3-ethoxy-3-oxopropyl)amino)azepane-1-carboxylate S13**

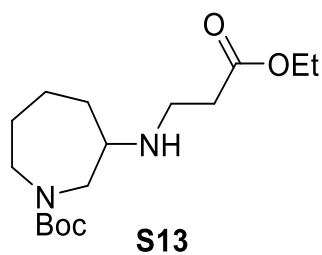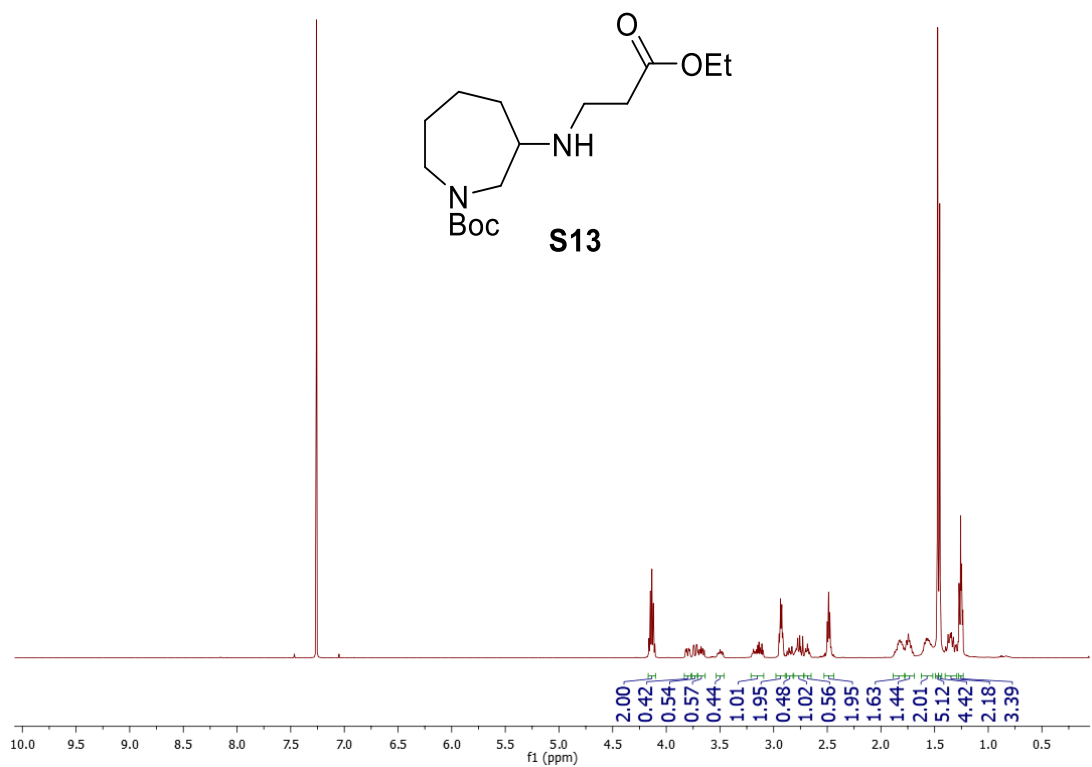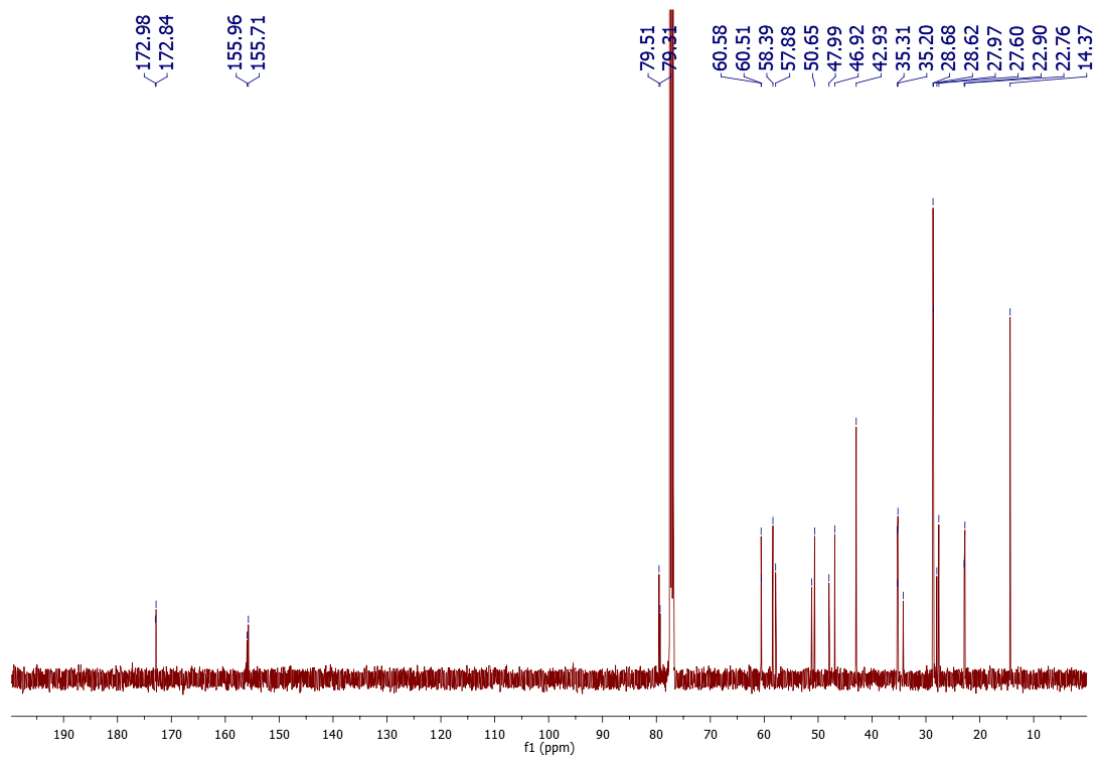

**tert-Butyl 3-(((benzyloxy)carbonyl)(3-ethoxy-3-oxopropyl)amino)azepane-1-carboxylate 9l**

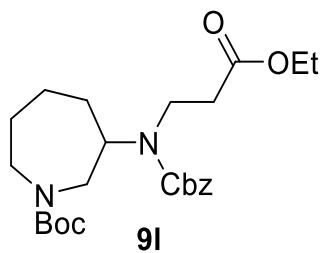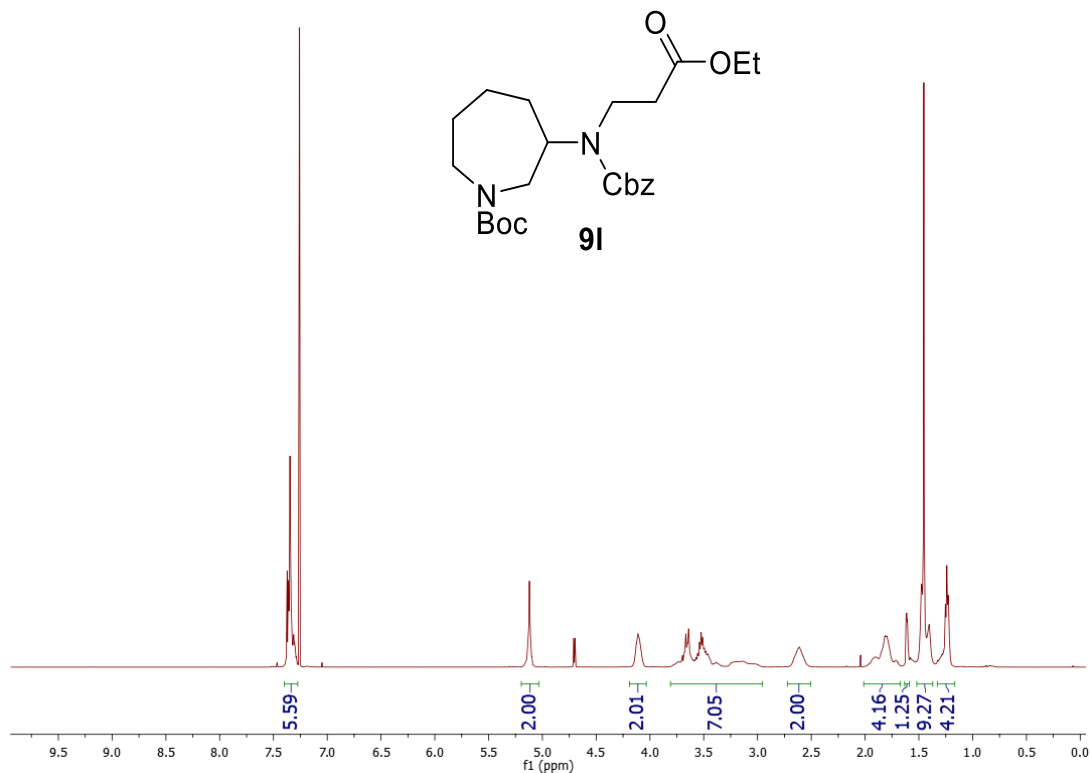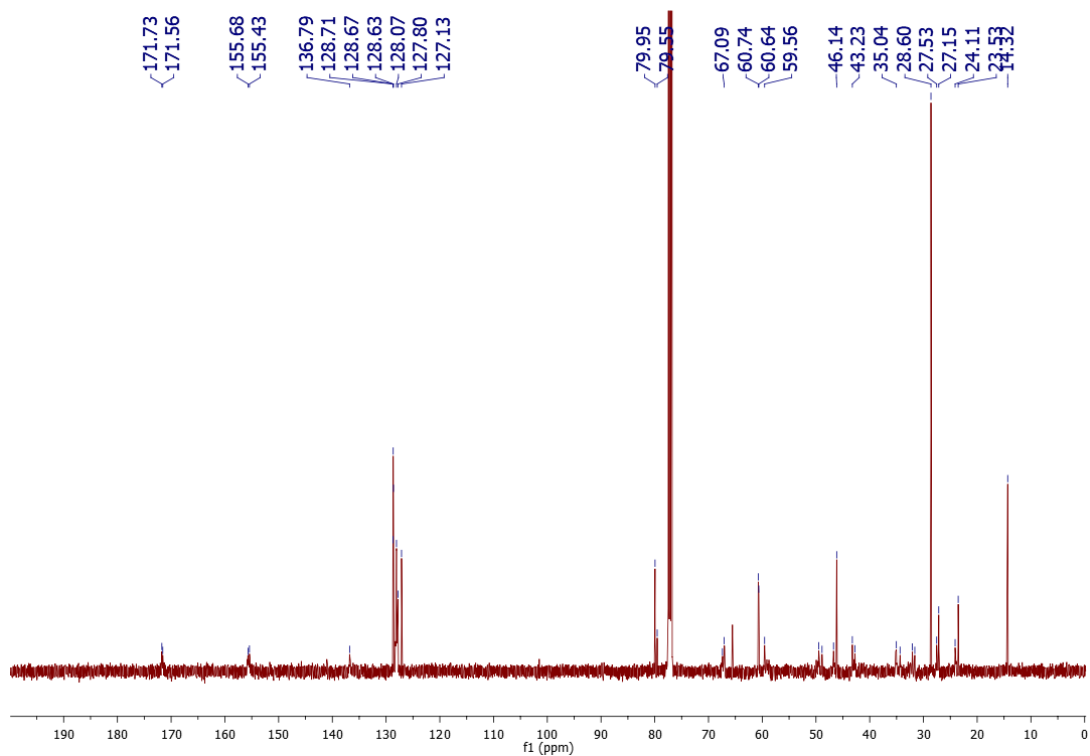



# Benzyl 2-oxo-1,5-diazabicyclo[4.4.1]undecane-5-carboxylate 6I

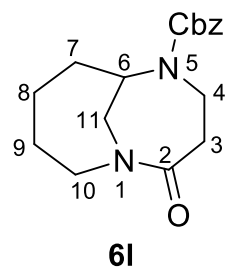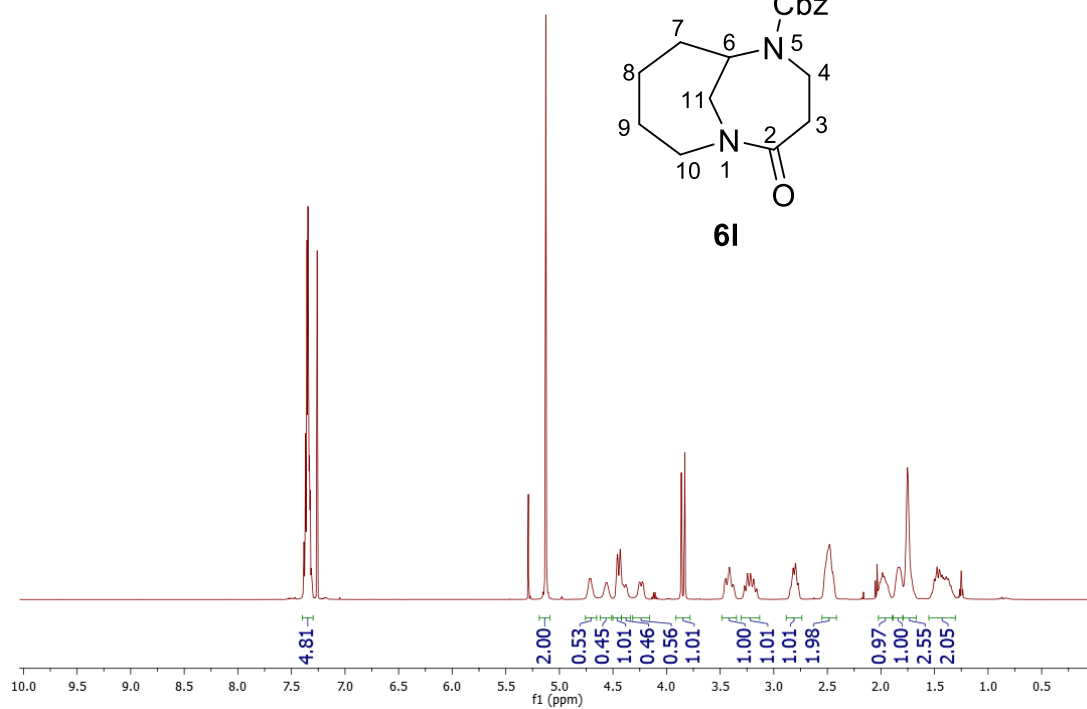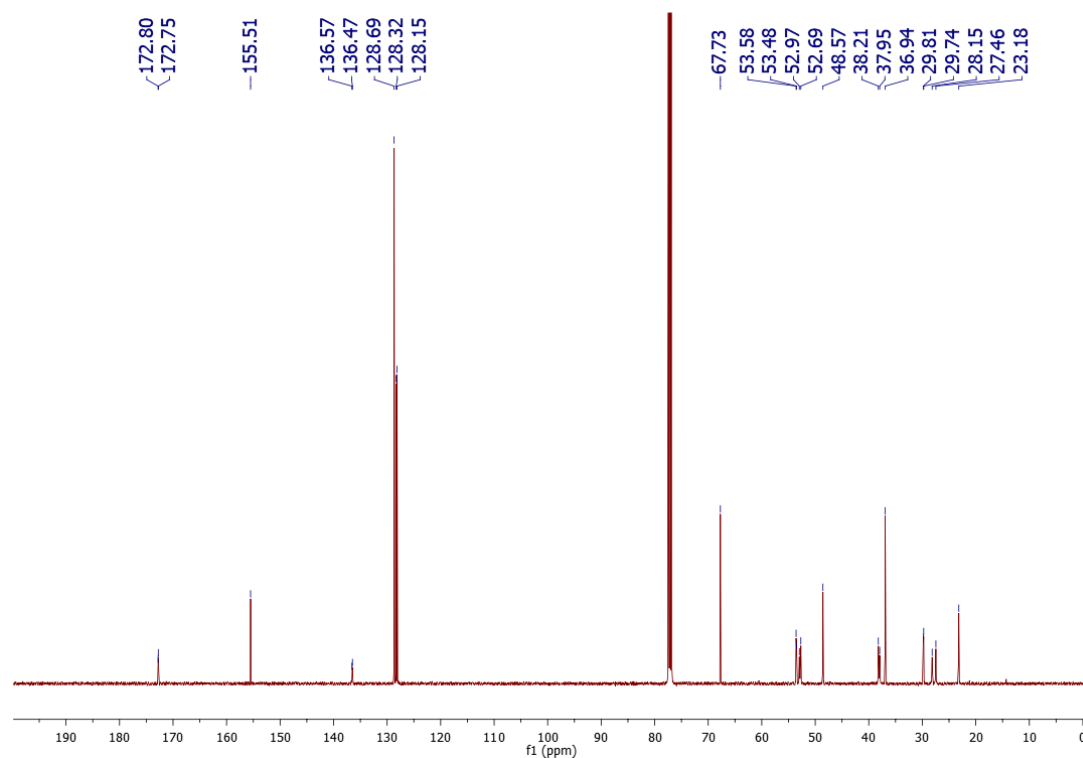

**tert-Butyl 3-((2-bromobenzyl)amino)pyrrolidine-1-carboxylate S14**

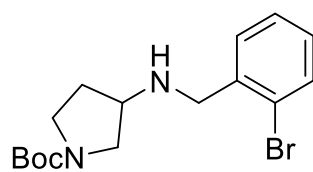

**S14**

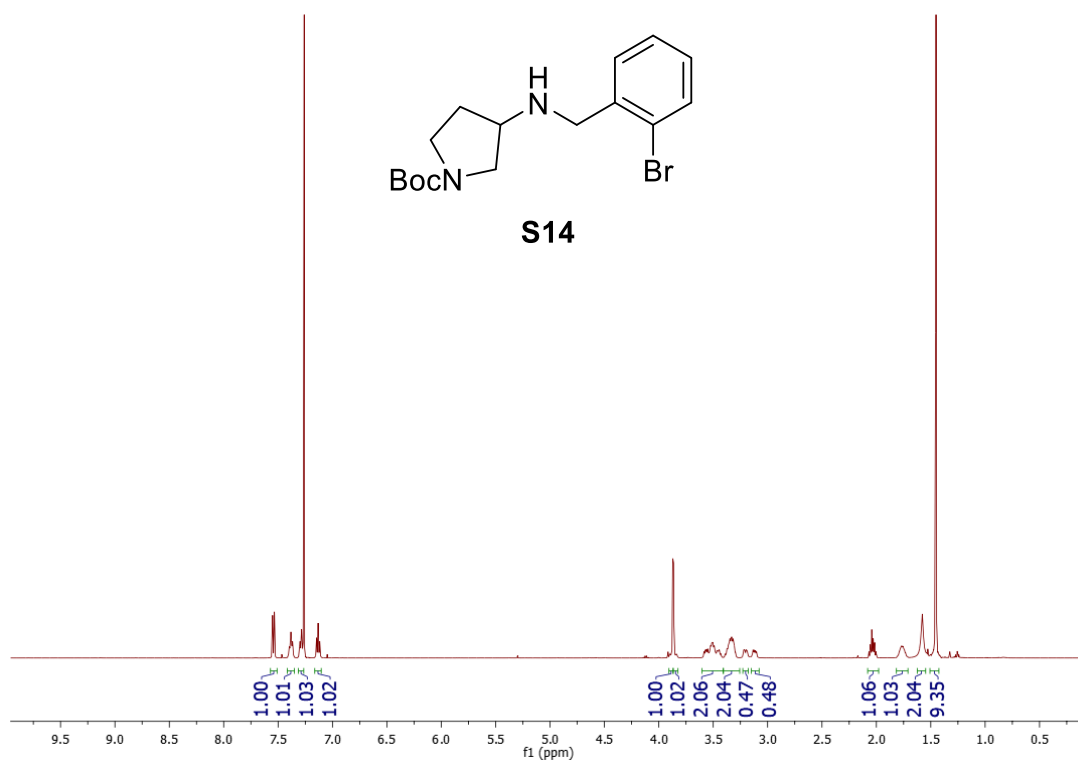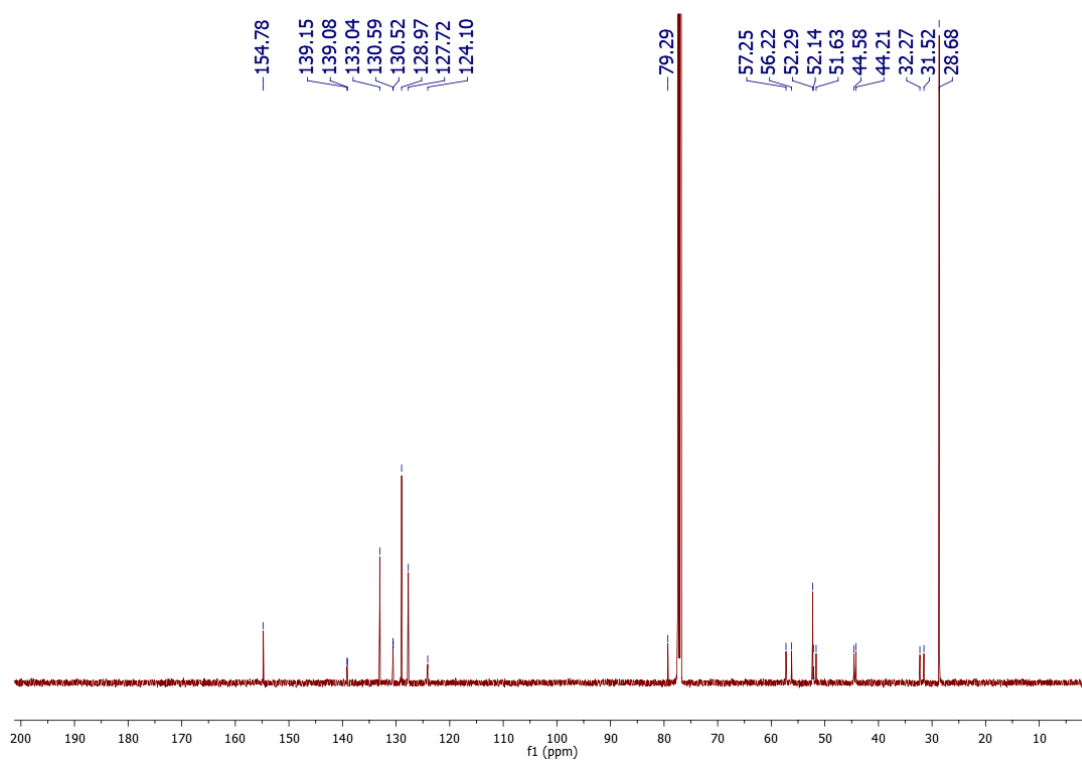

**tert-Butyl  
carboxylate 11a**

**3-(((benzyloxy)carbonyl)(2-bromobenzyl)amino)pyrrolidine-1-**

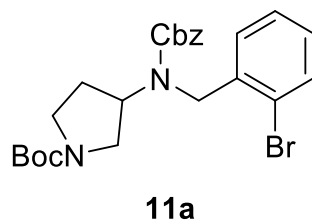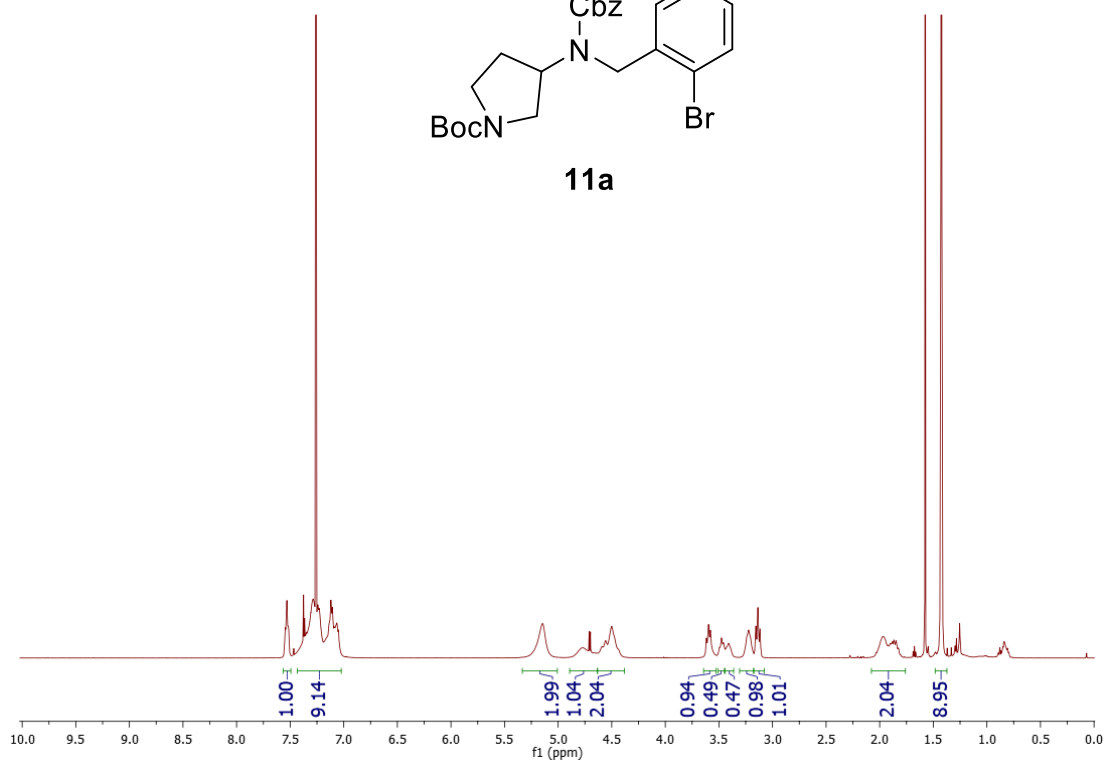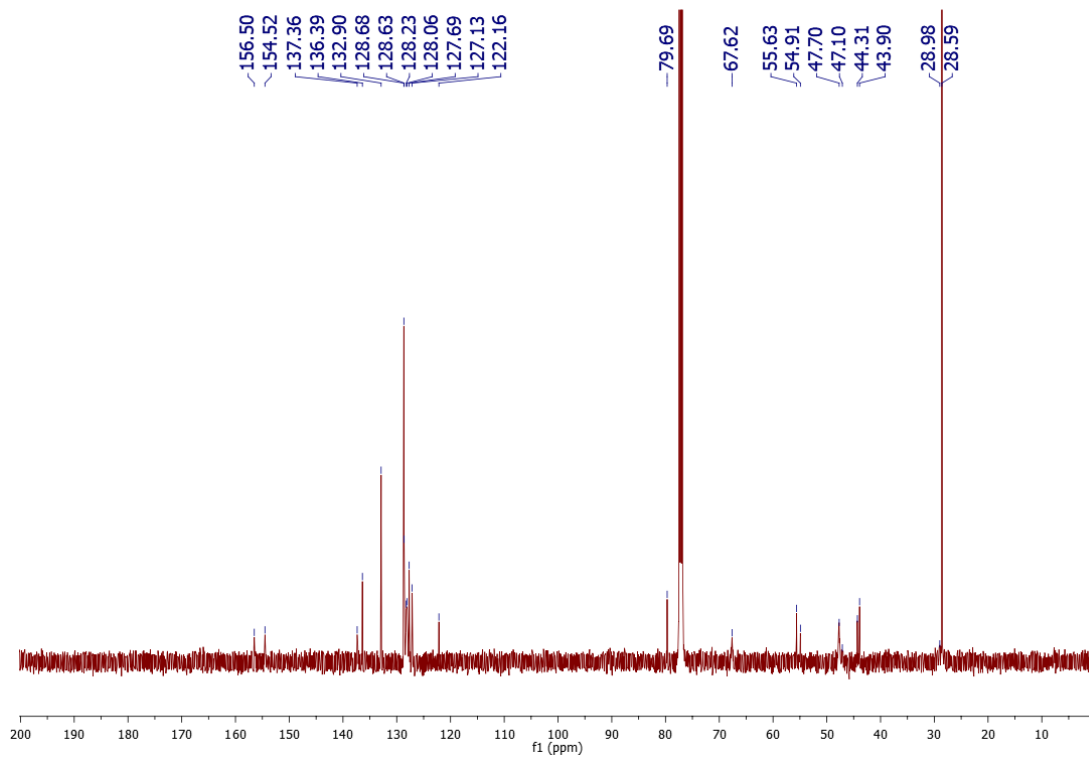

# Benzyl 3,4-dihydro-2H-1,4-methanobenzo[b][1,5]diazocine-5(6H)-carboxylate 7a

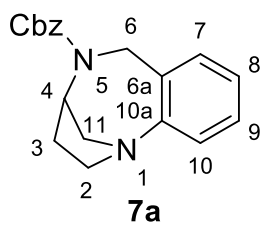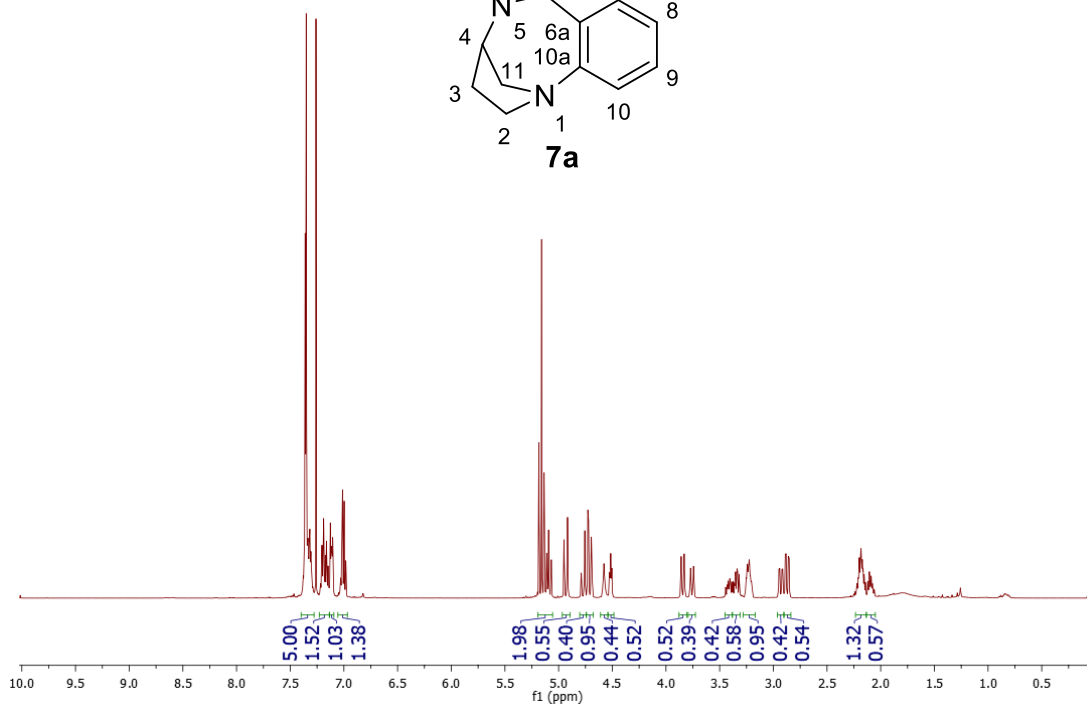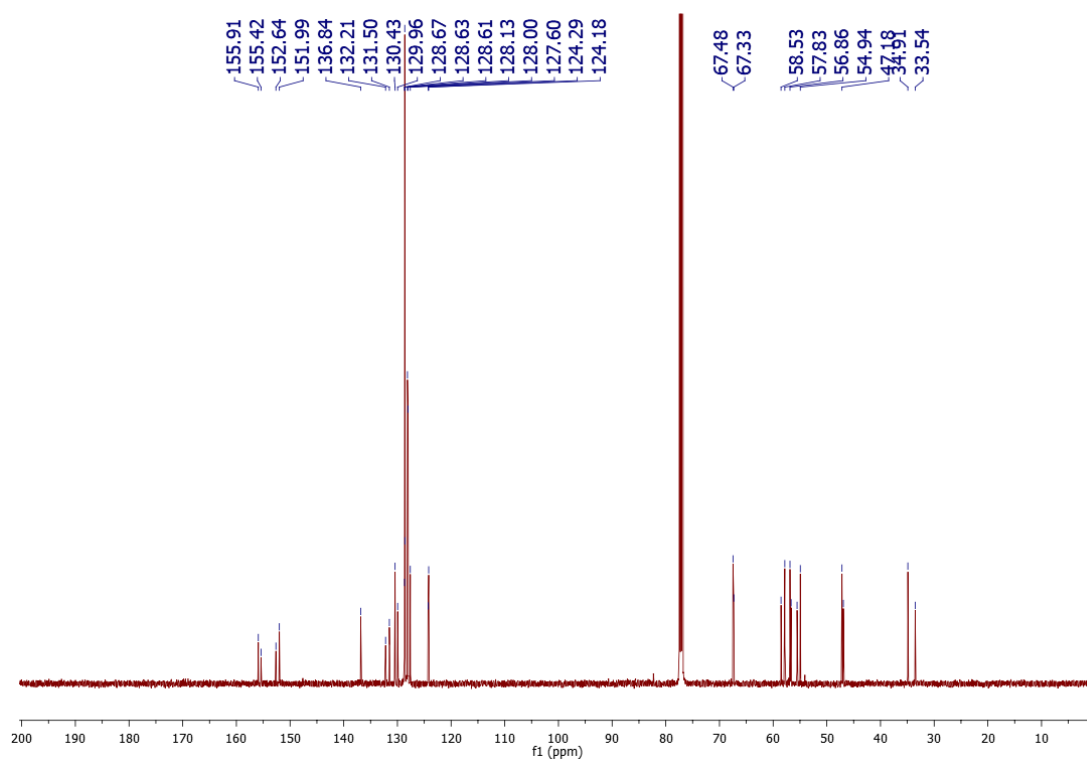

**tert-Butyl 3-((2-bromobenzyl)amino)piperidine-1-carboxylate S15**

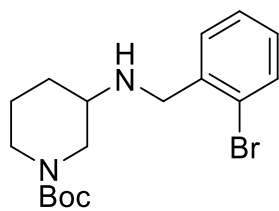

**S15**

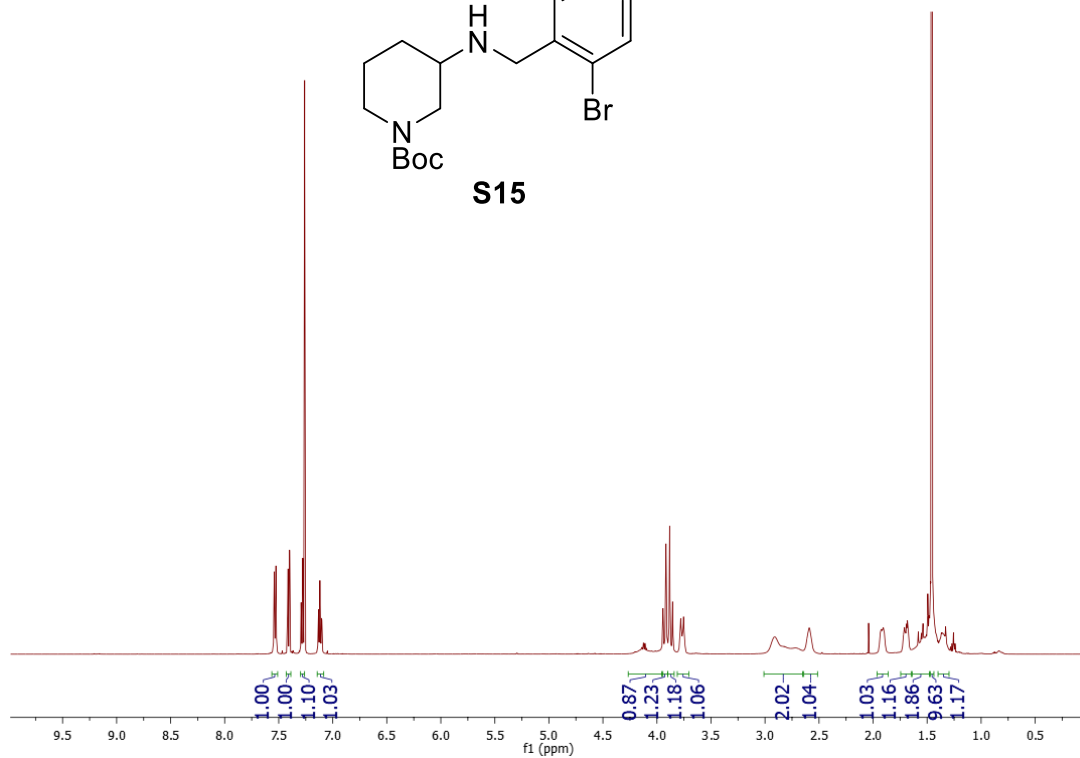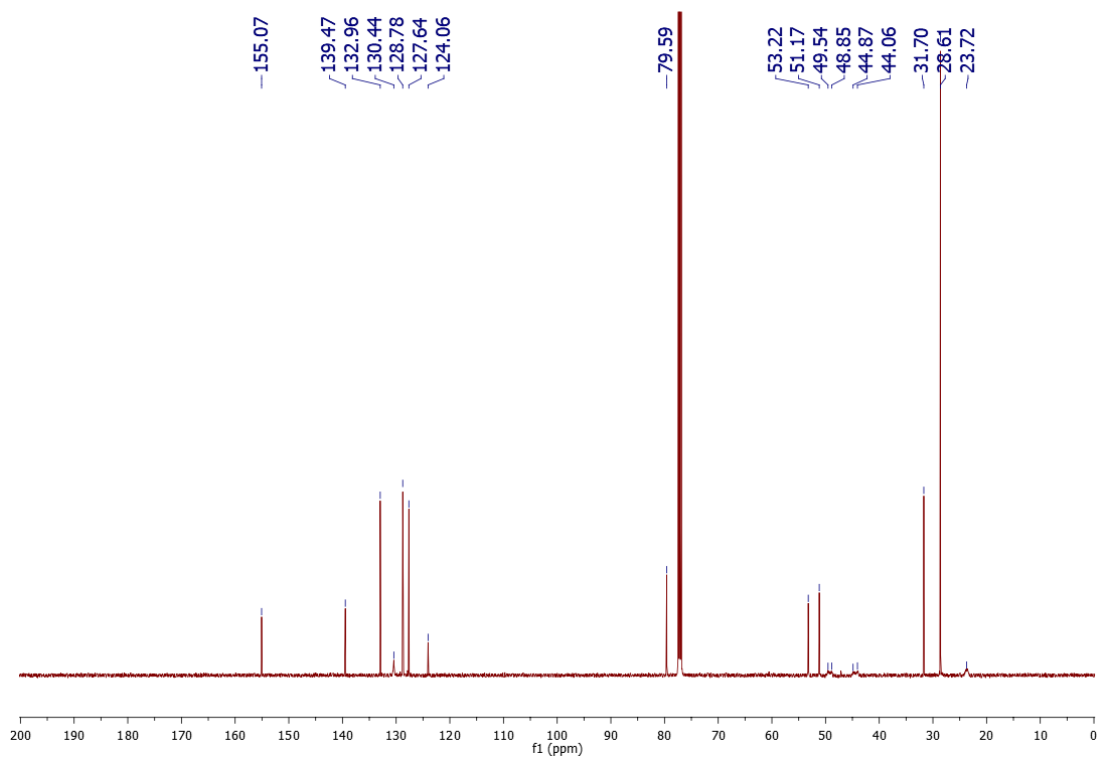

**tert-Butyl  
carboxylate 11b**

**3-(((benzyloxy)carbonyl)(2-bromobenzyl)amino)piperidine-1-**

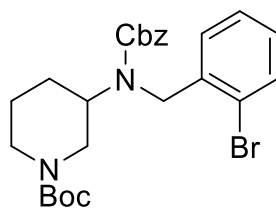

**11b**

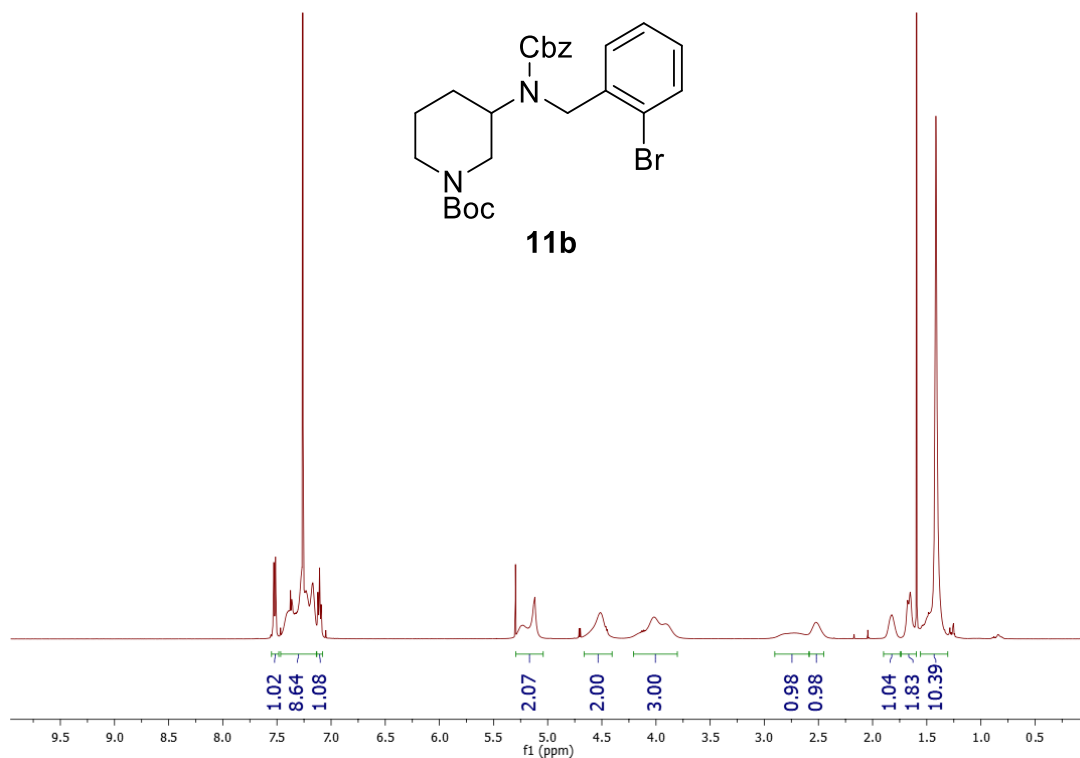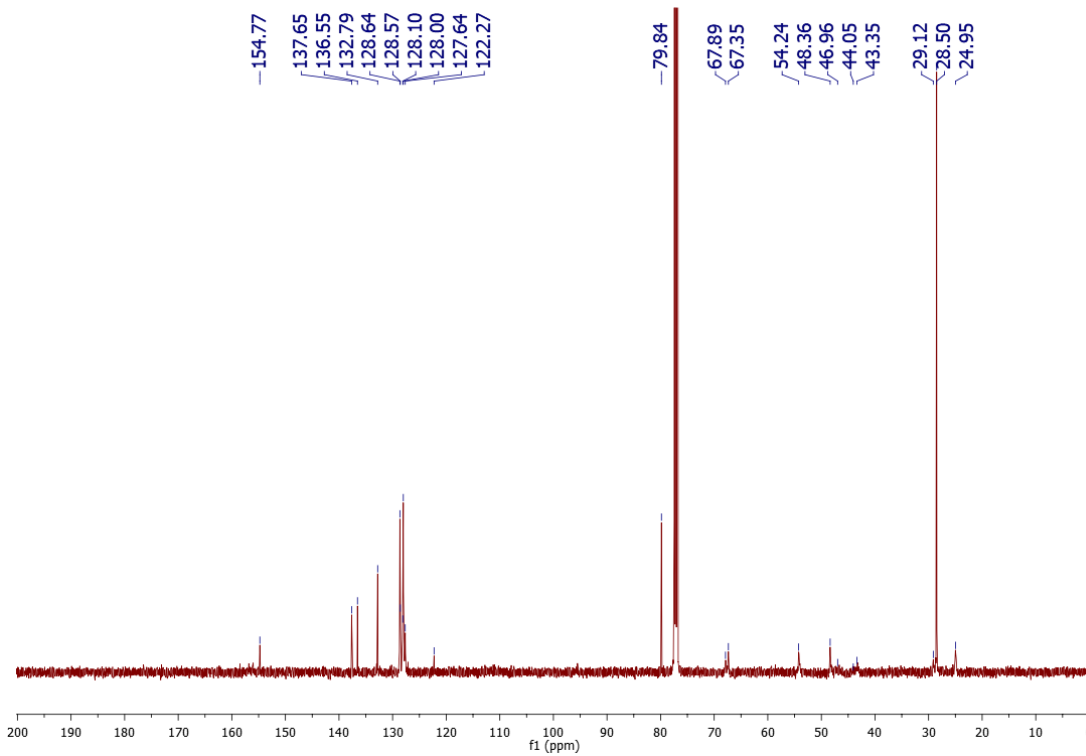

**Benzyl 2,3,4,5-tetrahydro-1,5-methanobenzo[b][1,5]diazonine-6(7H)-carboxylate 7b**

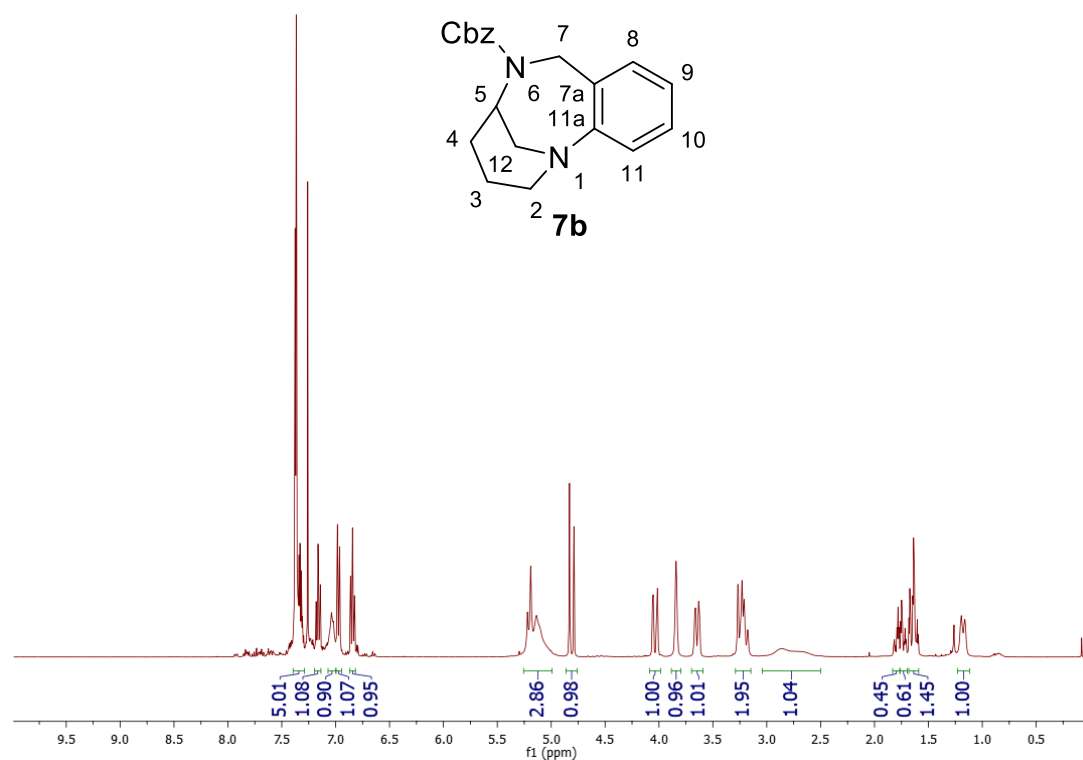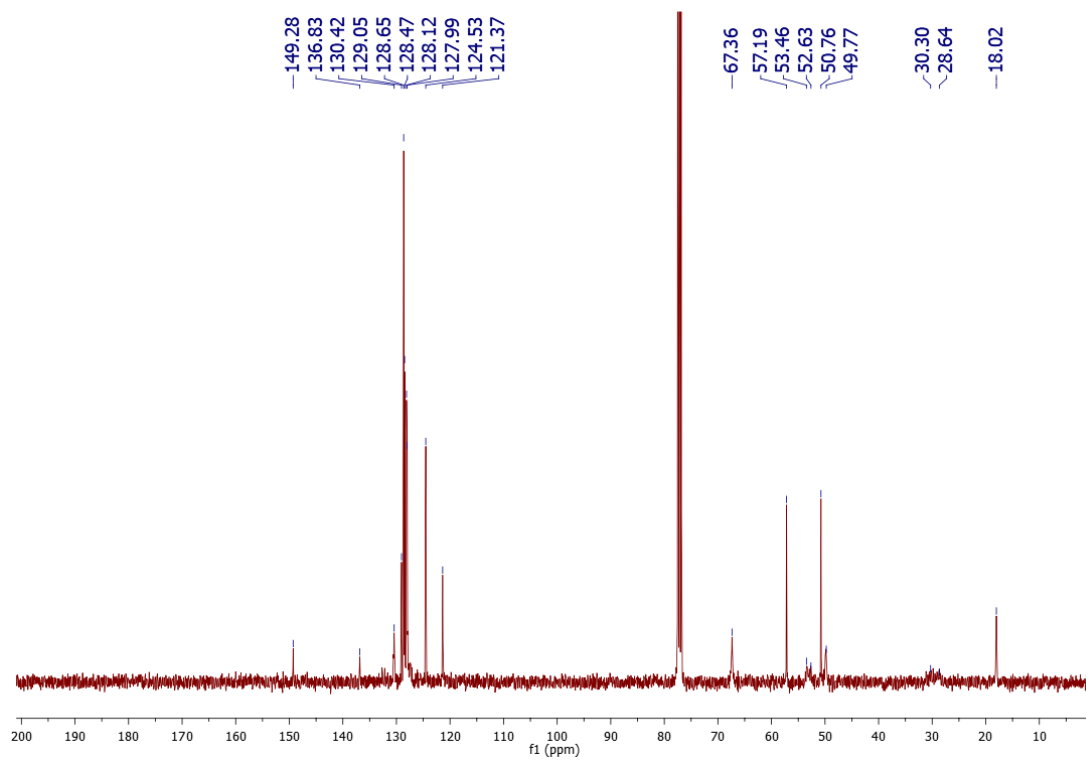

**tert-Butyl 3-((N-(2-bromobenzyl)-4-methylphenyl)sulfonamido)piperidine-1-carboxylate 11c**

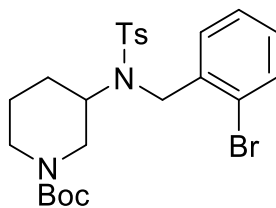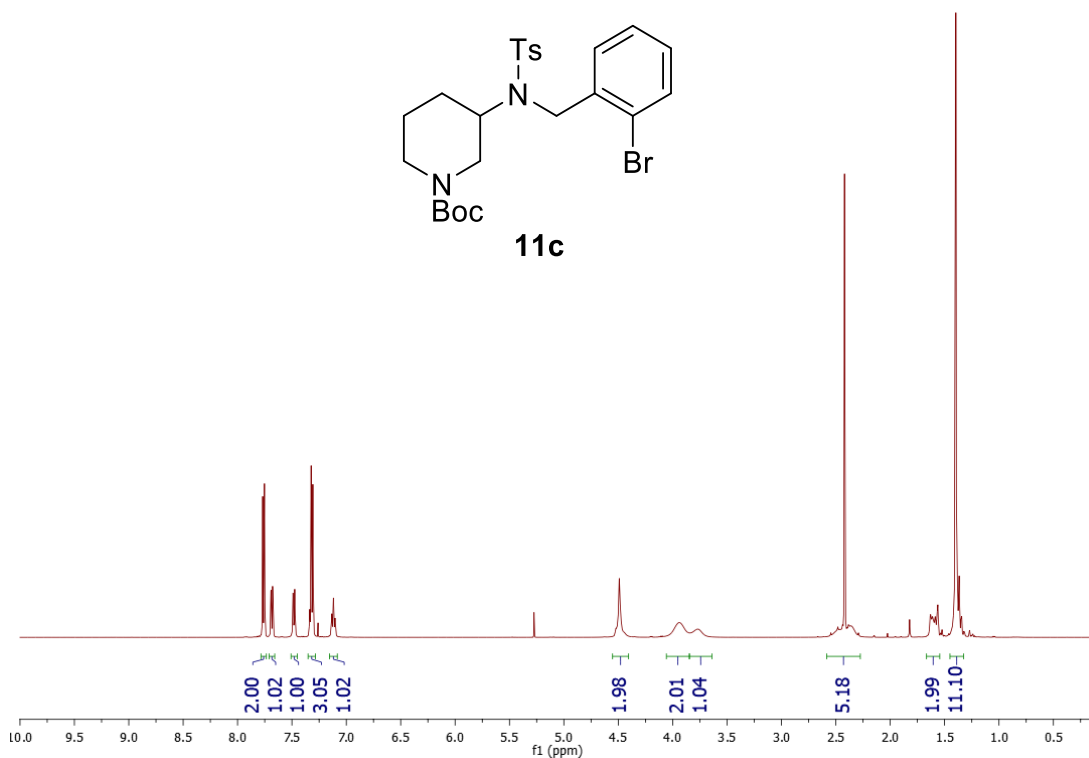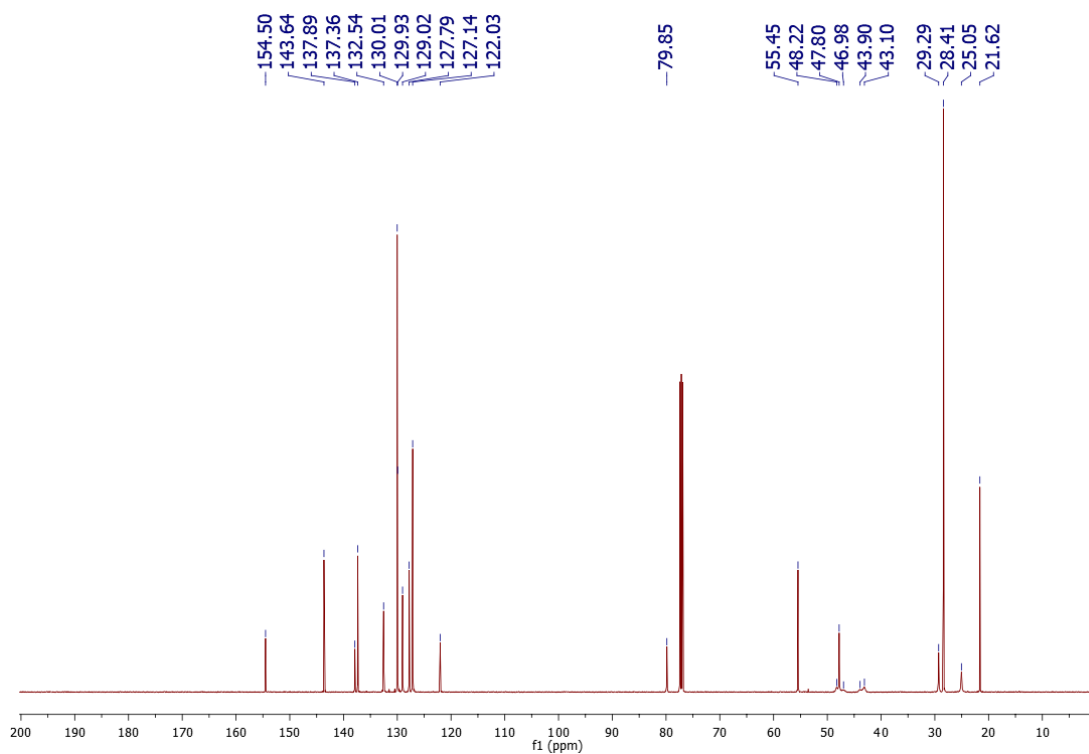



# 6-Tosyl-2,3,4,5,6,7-hexahydro-1,5-methanobenzo[b][1,5]diazonine 7c

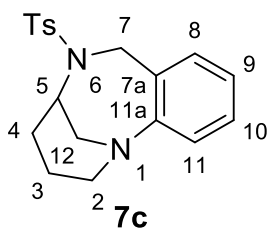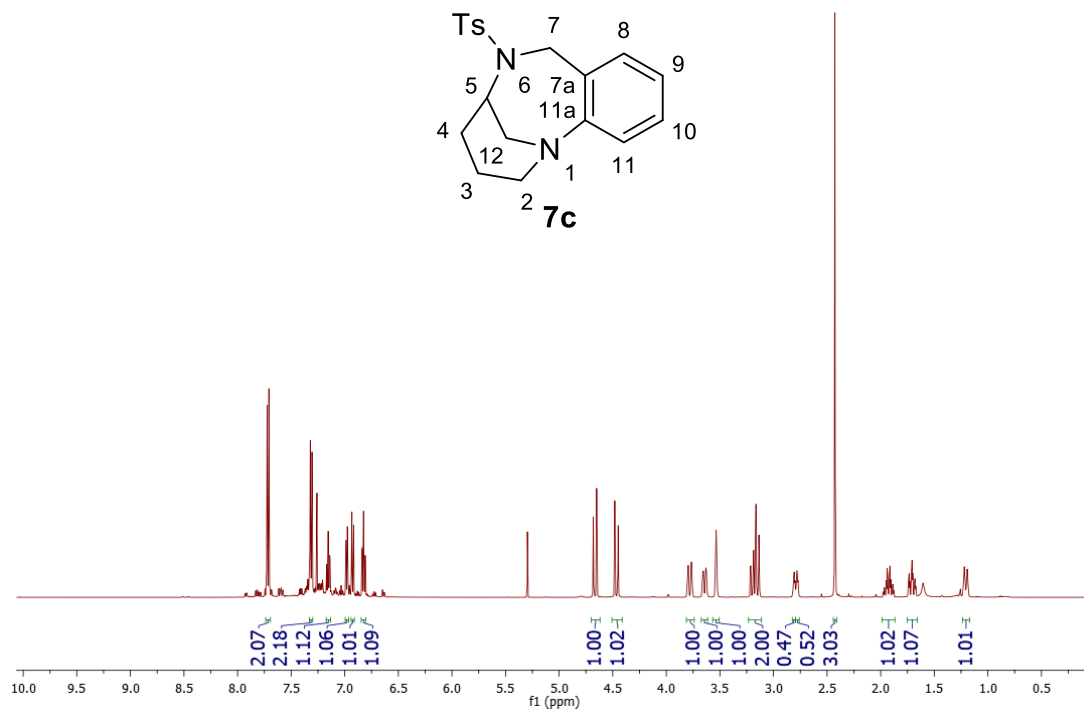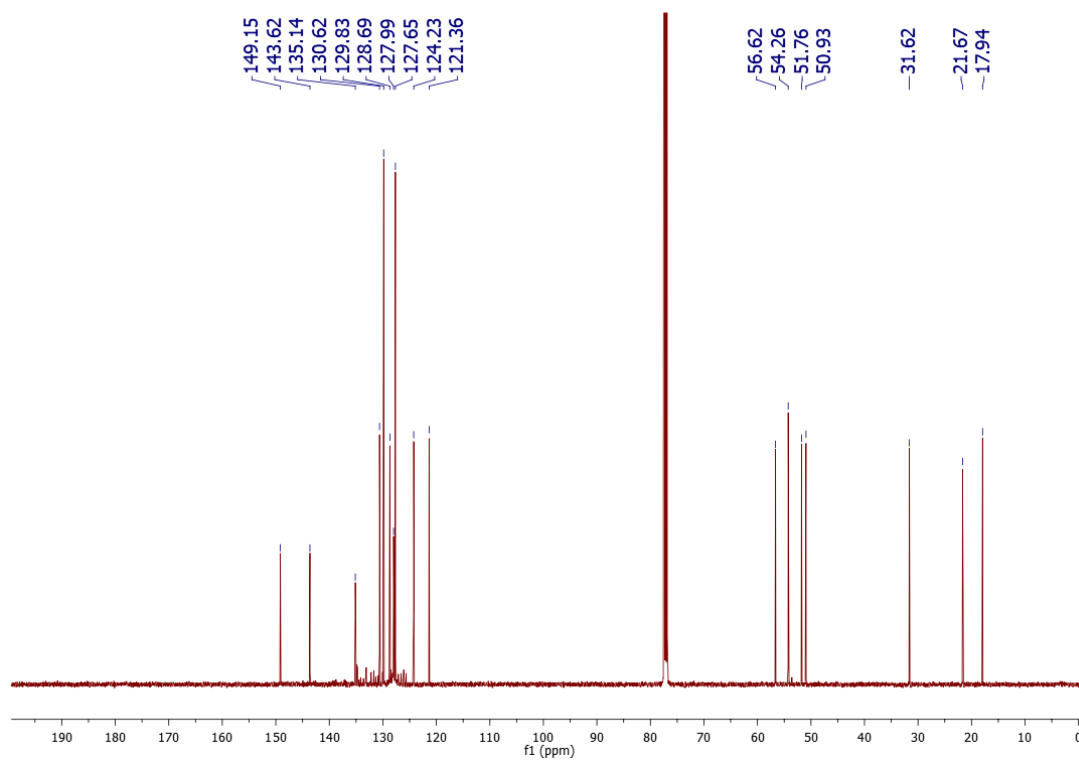

**tert-Butyl 3-((2-bromobenzyl)amino)azepane-1-carboxylate S16**

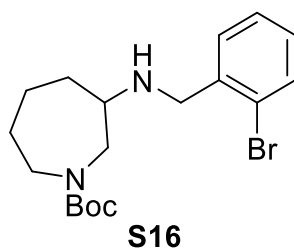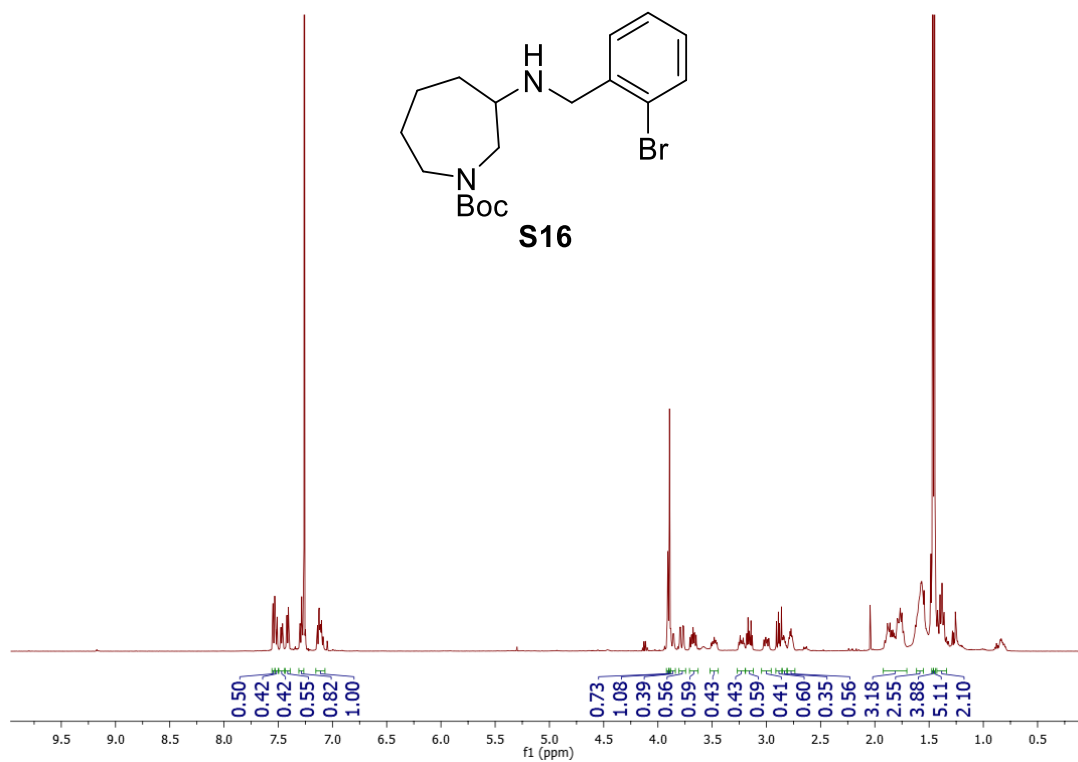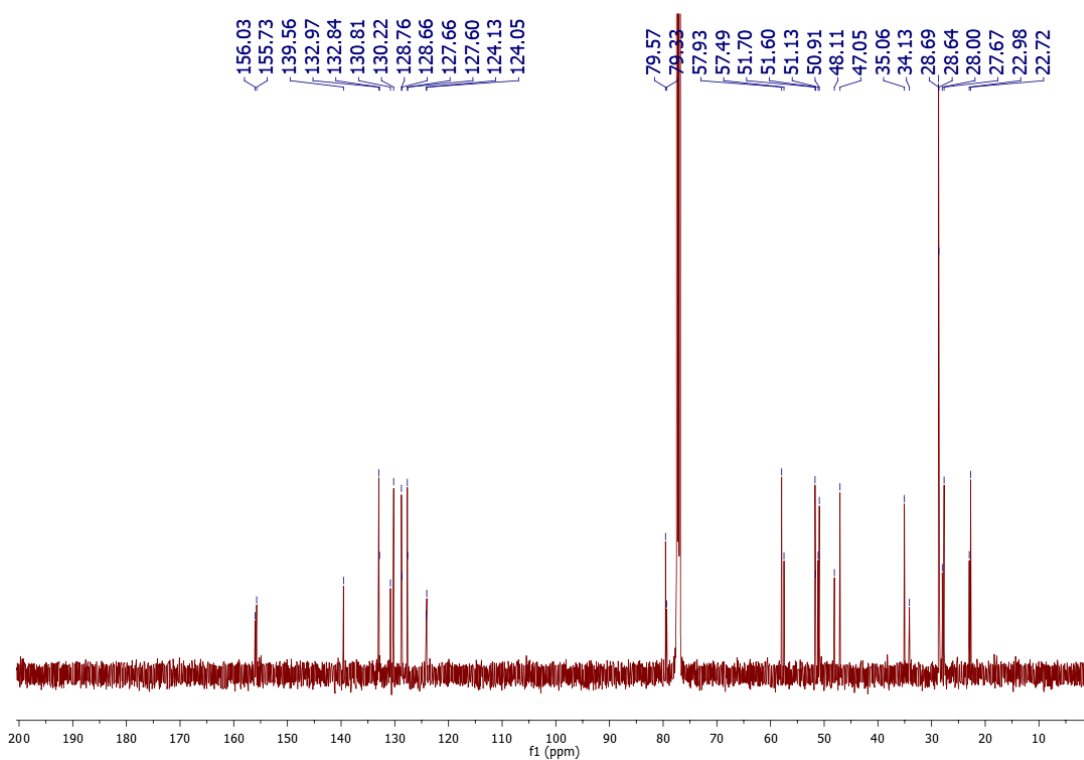

**tert-Butyl 3-(((benzyloxy)carbonyl)(2-bromobenzyl)amino)azepane-1-carboxylate  
11d**

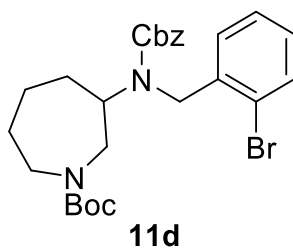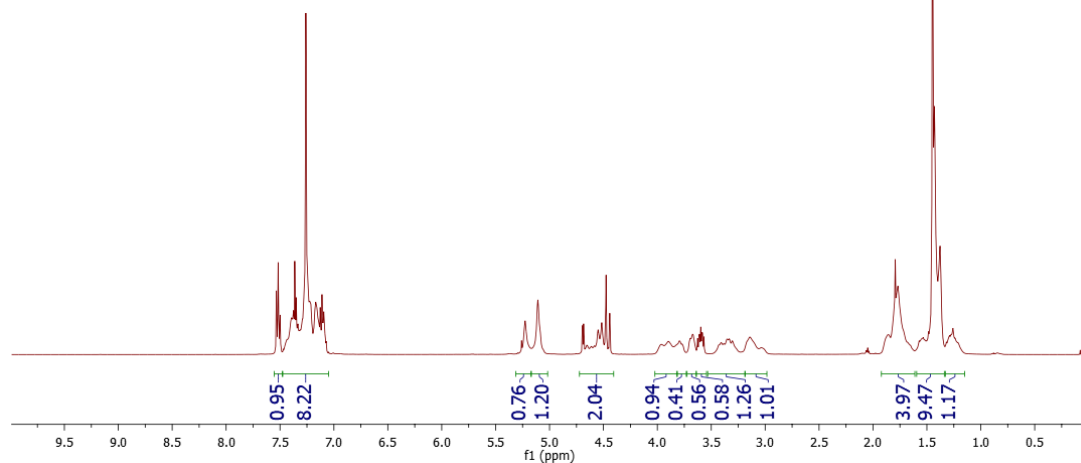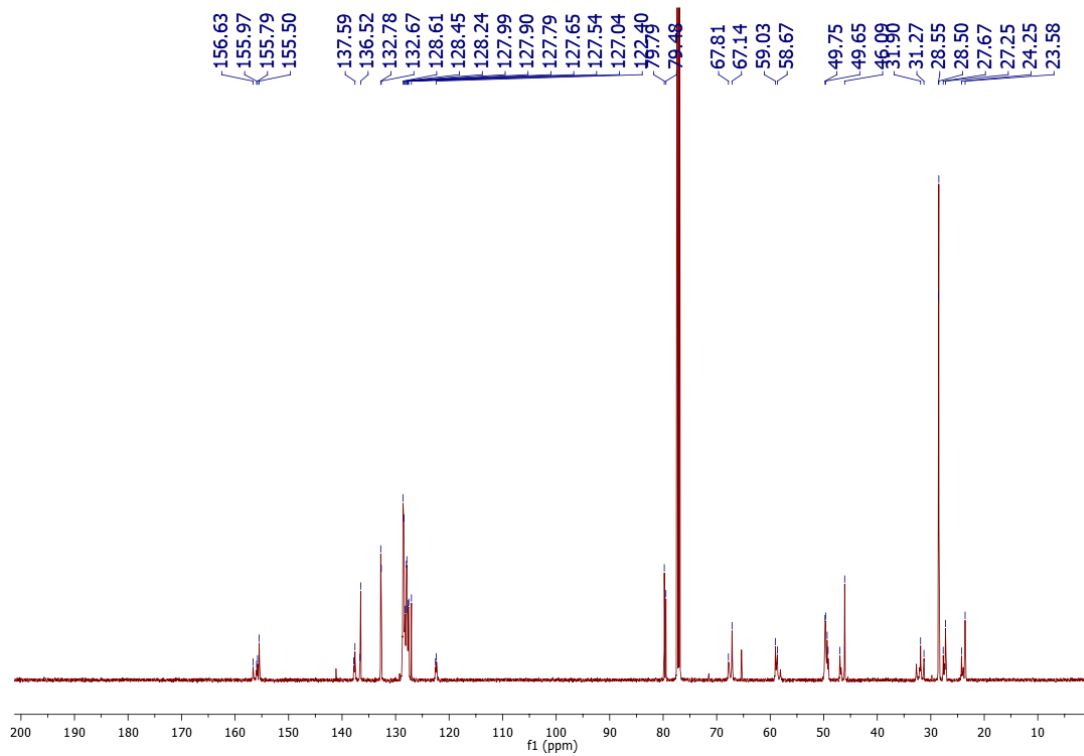

**Benzyl 3,4,5,6-tetrahydro-2H-1,6-methanobenzo[b][1,5]diazecine-7(8H)-carboxylate 7d**

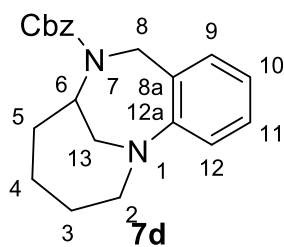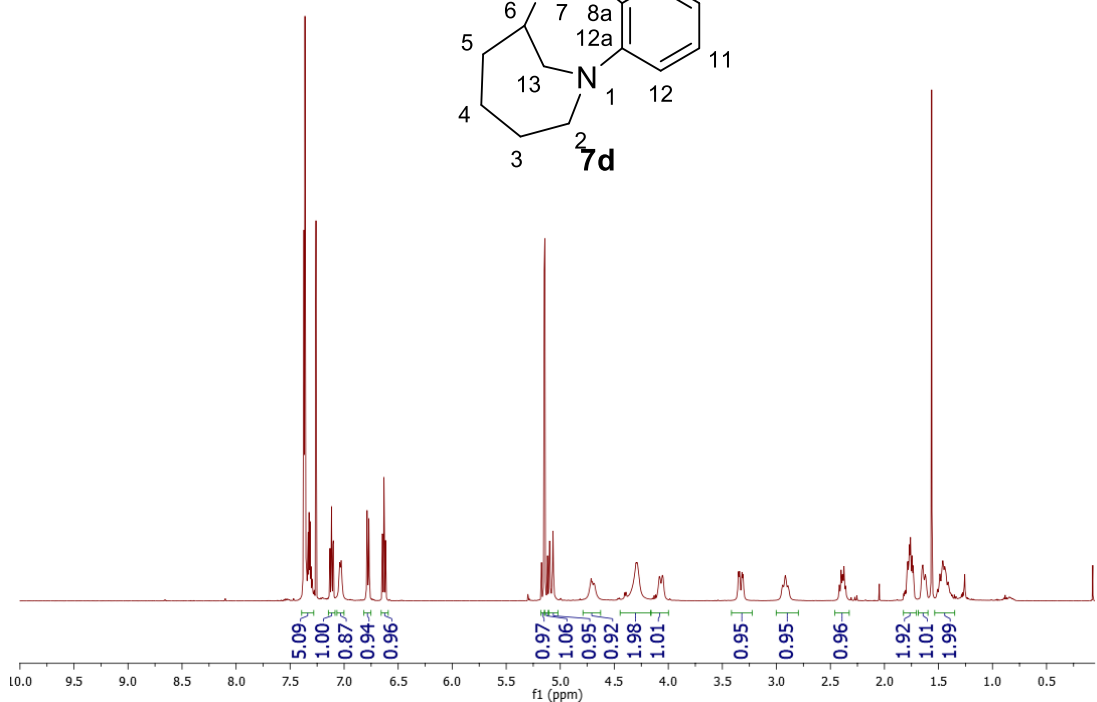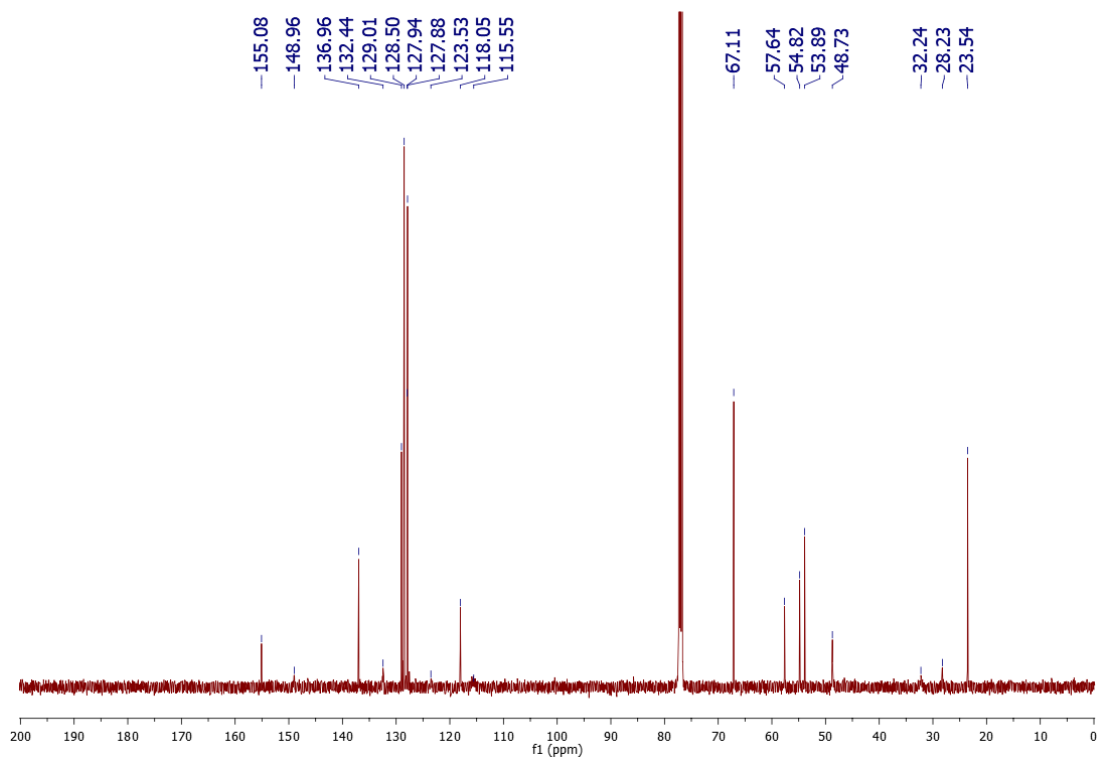

**(E)-1-Bromo-2-(2-nitrovinyl)benzene S17**

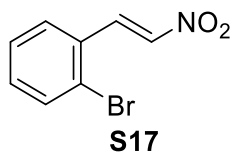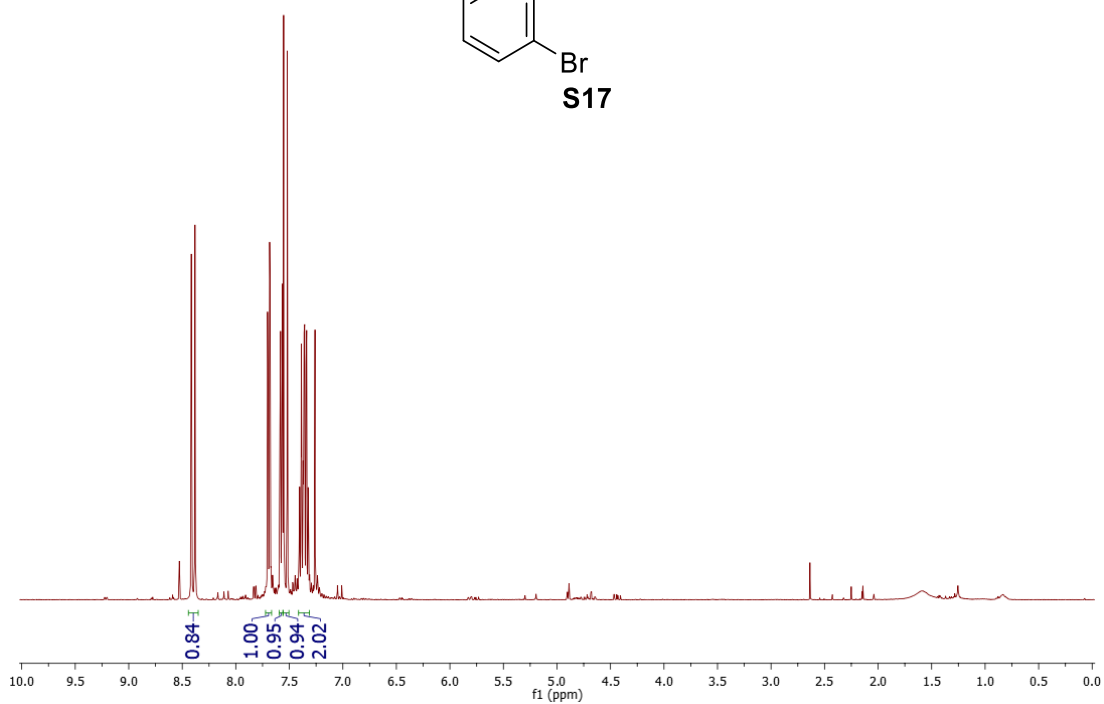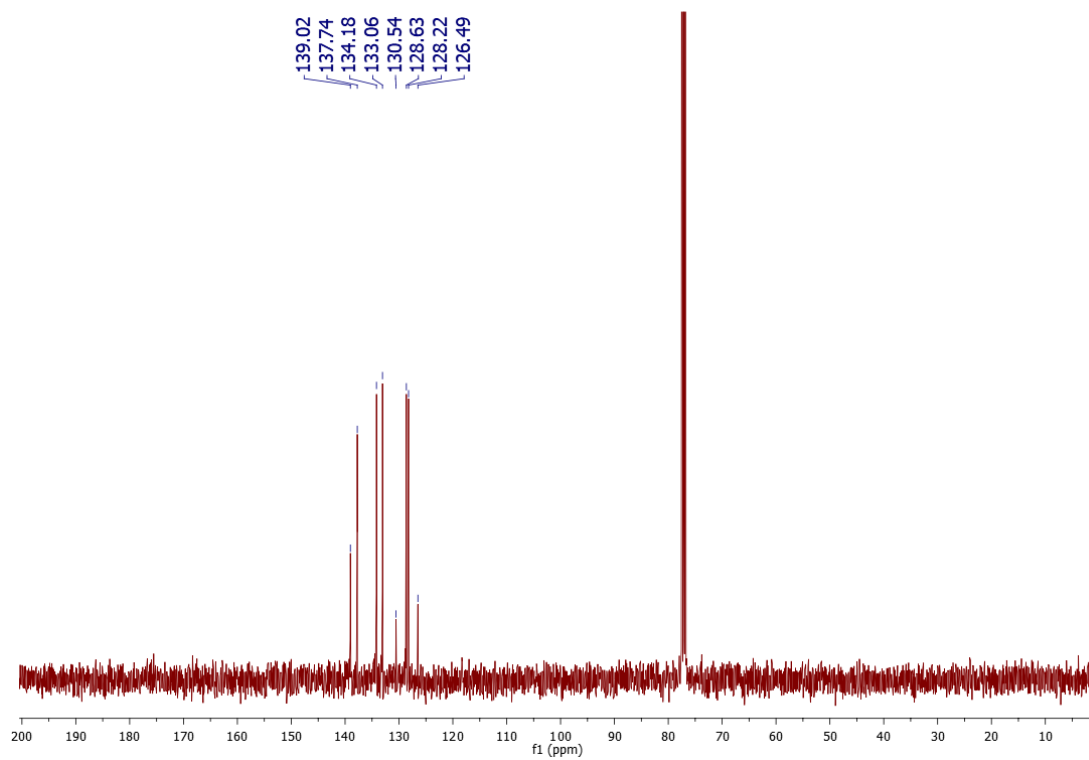

## 2-(2-Bromophenyl)ethan-1-amine 10b

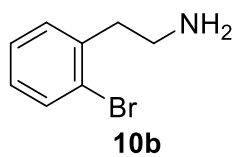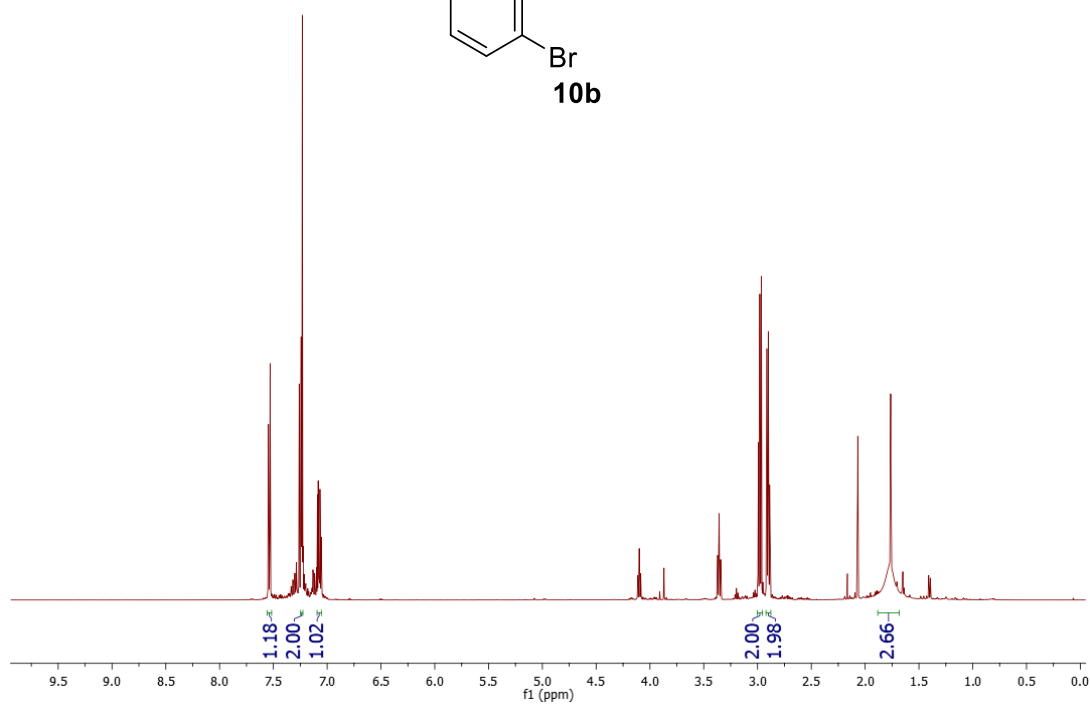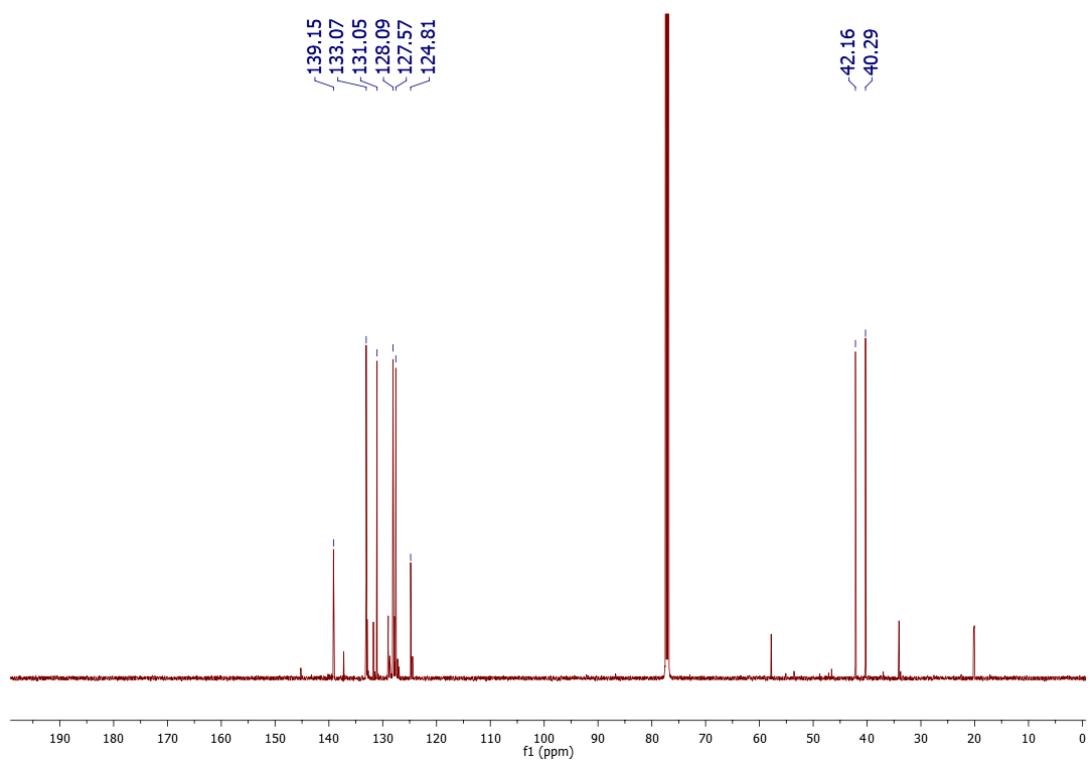

**tert-Butyl 3-((2-bromophenethyl)amino)piperidine-1-carboxylate S18**

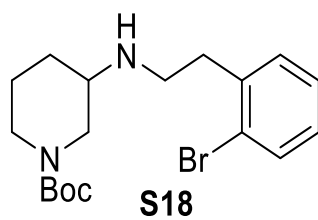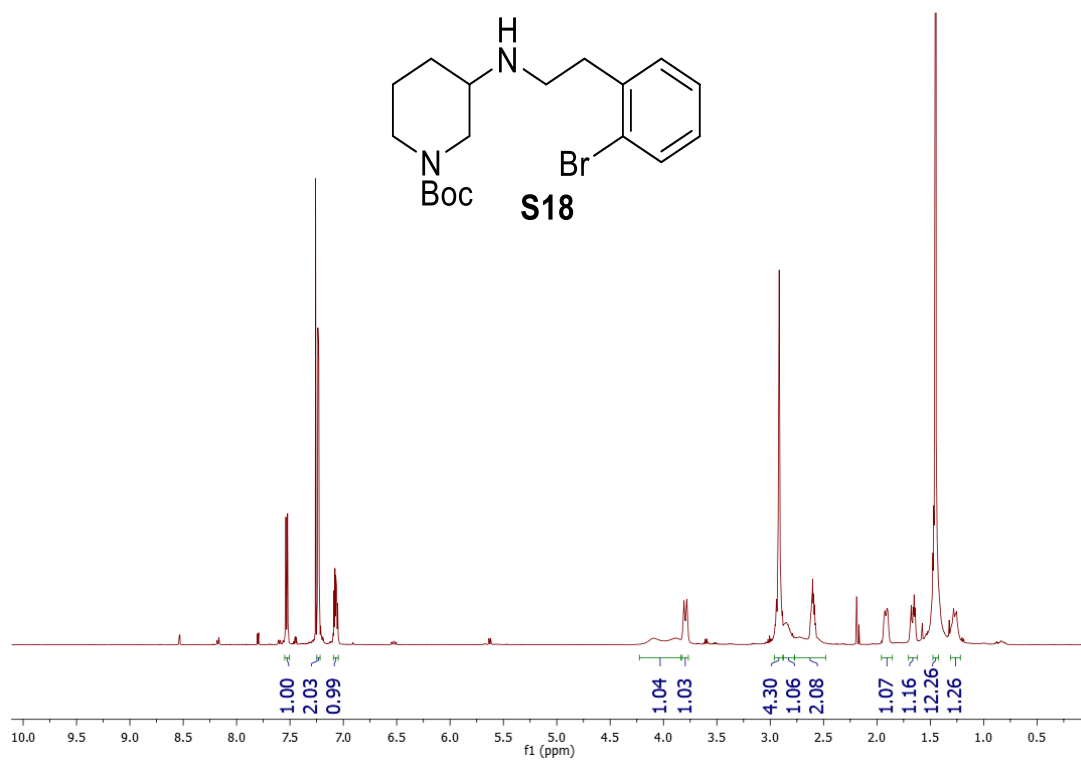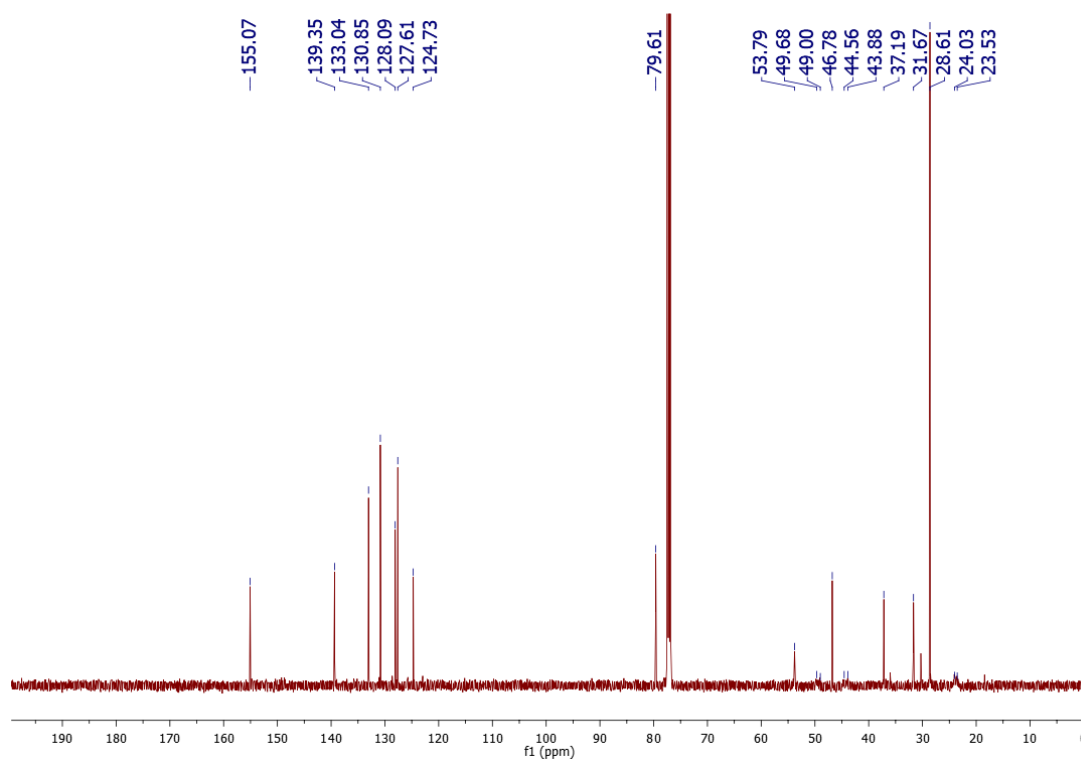

**tert-Butyl 3-(((benzyloxy)carbonyl)(2-bromophenethyl)amino)piperidine-1-carboxylate 11e**

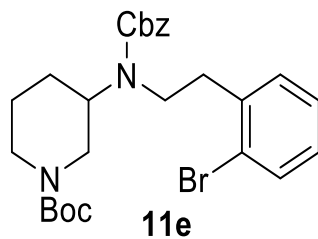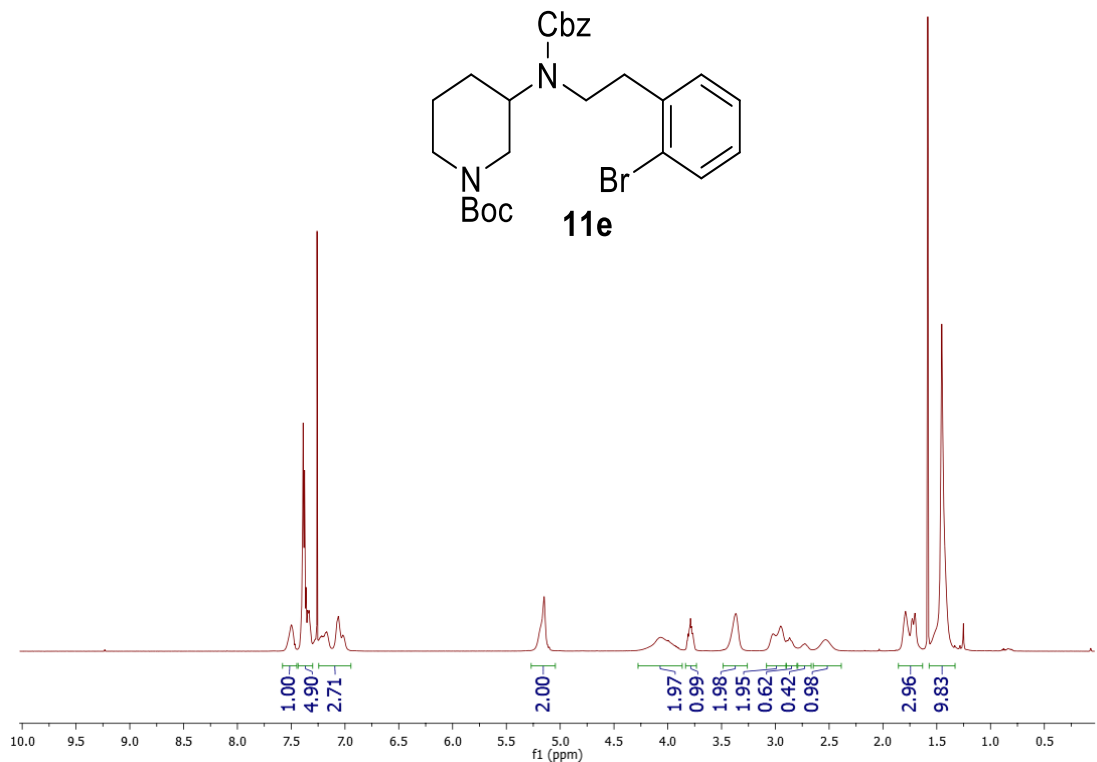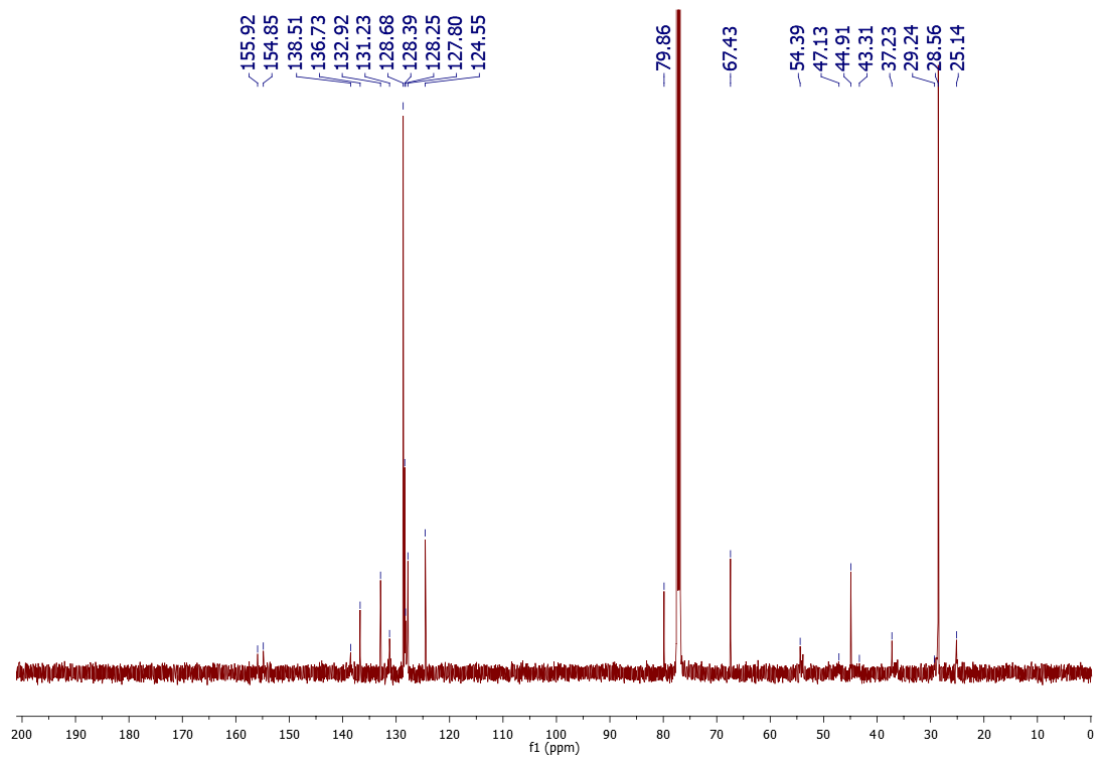



Benzyl  
carboxylate **7e**

2,3,4,5,7,8-hexahydro-6H-1,5-methanobenzo[b][1,6]diazecine-6-

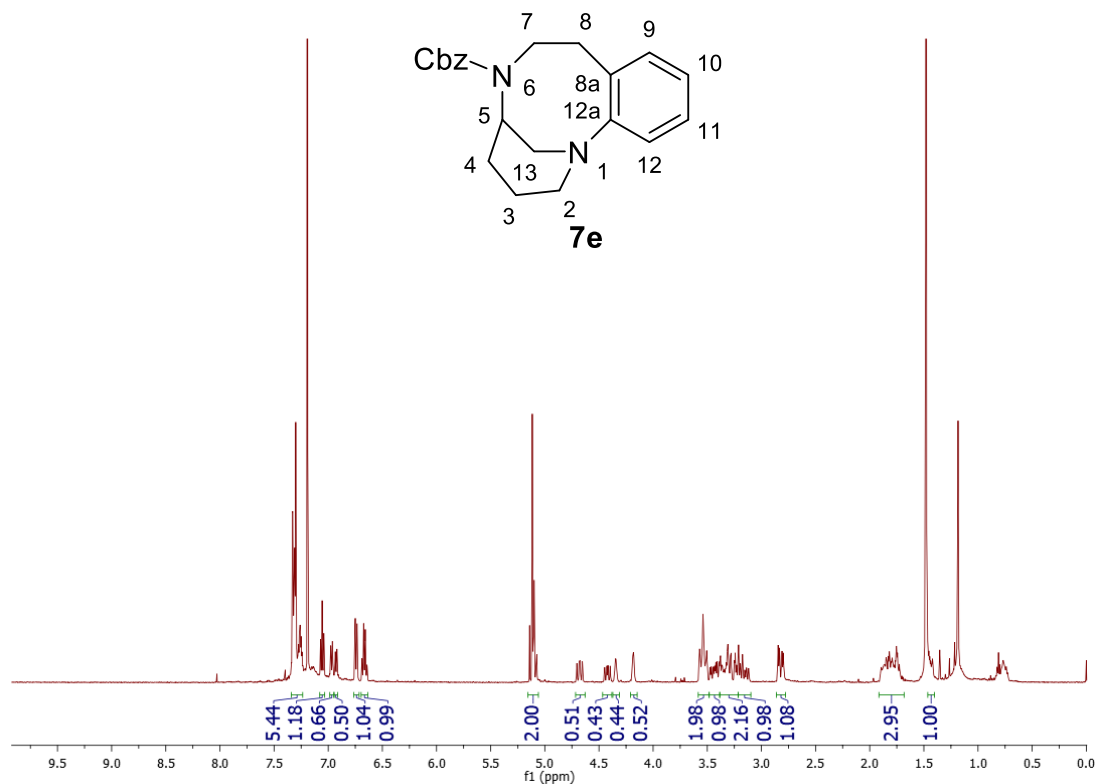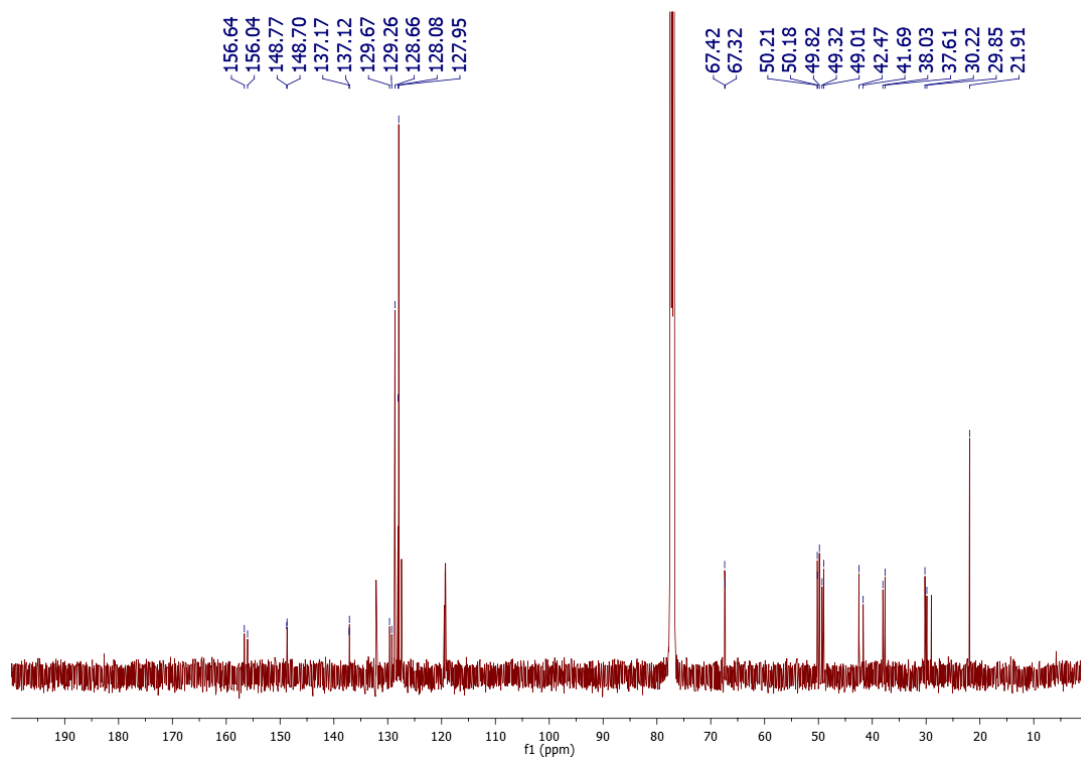

Supplement: d3cc01470c1.pdf [file d3cc01470c1.pdf]
